# Supplementary material for: Protein digestion using a cysteine-specific backbone cleavage reagent
Source: Royal Society of Chemistry journal article supplement (doi:10.1039/d6cb00152a), 2026-05-28
Supplement: d6cb00152a1.xlsx [file d6cb00152a1.xlsx]

## Sheet: evidence (2)
Sequence	CA (C)	CA (N-term)	Deamidation (N)	Oxidation (M)	Missed cleavages	MS/MS m/z	Charge	m/z	Mass
ATLTYEAQLINSGTITAR	0	0	0	0	0	962.516	2	962.013	1922.01
ATTQAYADYR	0	0	0	0	0	580.273	2	580.273	1158.53
ATTQAYADYRLEGAHEELLELAR	0	0	0	0	1	874.442	3	874.105	2619.29
CFGGNLTFEVAK	1	0	0	0	0	720.319	2	720.319	1438.62
CFPPGSGFGIGYR	1	0	0	0	0	1511.64	1	1511.64	1510.63
CFPPGSGFGIGYRELAGR	1	0	0	0	1	1019.97	2	1019.47	2036.92
DILVQIK	0	0	0	0	0	828.52	1	828.519	827.512
DNFFELGGNSLSLIR	0	0	0	0	0	561.29	3	561.29	1680.85
DSEAFRLEHQLPSWQR	0	0	0	0	1	666.999	3	666.998	1997.97
DTLTPYETSEK	0	0	0	0	0	642.305	2	642.304	1282.59
DTLTPYETSEKELEEMLADFDEEEK	0	0	0	0	1	998.113	3	997.778	2990.31
DTLTPYETSEKELEEMLADFDEEEKELMSNPLVR	0	0	0	0	2	1344.96	3	1344.29	4029.86
EGDLNVF	0	0	0	0	0	793.373	1	793.373	792.365
ELEEMLADFDEEEK	0	0	0	0	0	863.873	2	863.872	1725.73
ELEEMLADFDEEEKELMSNPLVR	0	0	0	0	1	923.103	3	922.766	2765.28
ELMSNPLVR	0	0	0	0	0	529.788	2	529.787	1057.56
GSHMASMTGGQQVLPAPEDAATGGTEYVAPR	0	0	0	0	0	1029.82	3	1029.48	3085.42
IYELIAK	0	0	0	0	0	425.258	2	425.258	848.501
LEGAHEELLELAR	0	0	0	0	0	493.933	3	493.932	1478.77
LEGGFVLYGIDFIDDATDYDAMLNR	0	0	0	0	0	1412.66	2	1412.16	2822.31
LEHQLPSWQR	0	0	0	0	0	431.895	3	431.895	1292.66
LVQAVYDETGIEIPLNR	0	0	0	0	0	966.02	2	965.518	1929.02
QQIEAEAGVLHGS	0	0	0	0	0	1338.66	1	1338.66	1337.66
QVGVKDNFFELGGNSLSLIR	0	0	0	0	1	732.062	3	731.727	2192.16
VDETAVVIR	0	0	0	0	0	501.286	2	501.285	1000.56
VDETAVVIRDILVQIK	0	0	0	0	1	605.039	3	604.359	1810.06
VWQDTLGVR	0	0	0	0	0	537.291	2	537.291	1072.57
YVDEIVR	0	0	0	0	0	447.241	2	447.24	892.465

## Sheet: evidence
Sequence	Length	C count	H count	N count	O count	S count	P count	Modifications	Modified sequence	CA (C) Probabilities	Deamidation (N) Probabilities	Oxidation (M) Probabilities	CA (C) Score Diffs	Deamidation (N) Score Diffs	Oxidation (M) Score Diffs	CA (C)	CA (N-term)	Deamidation (N)	Oxidation (M)	Missed cleavages	Proteins	Leading proteins	Leading razor protein	Type	Raw file	Experiment	MS/MS m/z	Charge	m/z	Mass	Uncalibrated - Calibrated m/z [ppm]	Uncalibrated - Calibrated m/z [Da]	Mass error [ppm]	Mass error [Da]	Uncalibrated mass error [ppm]	Uncalibrated mass error [Da]	Max intensity m/z 0	Retention time	Retention length	Calibrated retention time	Calibrated retention time start	Calibrated retention time finish	Retention time calibration	Scan index	Scan index min	Scan index max	Match time difference	Match m/z difference	Match q-value
ATLTYEAQLINSGTITAR	18	83	139	23	29	0	0	Unmodified	_ATLTYEAQLINSGTITAR_							0	0	0	0	0	P20260	P20260	P20260	MULTI-MSMS	20260305_P_MTE_gel_TrpDTT_CA_NCE28	20260305_P_MTE_gel_TrpDTT_CA_NCE28.raw	962.516	2	962.013	1922.01	-0.04163	-4.0049e-05	1.1988	0.0011533	1.1572	0.0011132	962.014	13.562	2.9914	13.562	13.292	16.283	0	0	0	0
ATLTYEAQLINSGTITAR	18	83	139	23	29	0	0	Unmodified	_ATLTYEAQLINSGTITAR_							0	0	0	0	0	P20260	P20260	P20260	MULTI-MSMS	20260305_P_MTE_gel_TrpDTT_CA_NCE28	20260305_P_MTE_gel_TrpDTT_CA_NCE28.raw	962.52	2	962.013	1922.01	-0.04163	-4.0049e-05	3.7965	0.0036523	3.7549	0.0036122	962.517	55.285	0.45638	55.285	55.226	55.682	0	0	0	0
ATTQAYADYR	10	50	74	14	18	0	0	Unmodified	_ATTQAYADYR_							0	0	0	0	0	P20260	P20260	P20260	MULTI-MSMS	20260305_P_MTE_gel_TrpDTT_CA_NCE28	20260305_P_MTE_gel_TrpDTT_CA_NCE28.raw	580.273	2	580.273	1158.53	-0.04163	-2.4157e-05	1.9247	0.0011169	1.8831	0.0010927	580.274	2.3163	0.53994	2.3163	2.0893	2.6292	0	0	0	0
ATTQAYADYR	10	50	74	14	18	0	0	Unmodified	_ATTQAYADYR_							0	0	0	0	0	P20260	P20260	P20260	MULTI-MSMS	20260305_P_MTE_gel_TrpDTT_CA_NCE28	20260305_P_MTE_gel_TrpDTT_CA_NCE28.raw	580.274	2	580.273	1158.53	-0.04163	-2.4157e-05	1.7787	0.0010321	1.7371	0.001008	580.274	3.7066	1.3048	3.7066	2.5602	3.8651	0	0	0	0
ATTQAYADYR	10	50	74	14	18	0	0	Unmodified	_ATTQAYADYR_							0	0	0	0	0	P20260	P20260	P20260	MULTI-MSMS	20260305_P_MTE_gel_TrpDTT_CA_NCE28	20260305_P_MTE_gel_TrpDTT_CA_NCE28.raw	580.274	2	580.273	1158.53	-0.041632	-2.4158e-05	2.1266	0.001234	2.0849	0.0012098	580.274	4.1724	0.94365	4.1724	3.8651	4.8087	0	0	0	0
ATTQAYADYRLEGAHEELLELAR	23	114	178	32	39	0	0	Unmodified	_ATTQAYADYRLEGAHEELLELAR_							0	0	0	0	1	P20260	P20260	P20260	MULTI-MSMS	20260305_P_MTE_gel_TrpDTT_CA_NCE28	20260305_P_MTE_gel_TrpDTT_CA_NCE28.raw	874.442	3	874.105	2619.29	-0.041631	-3.639e-05	1.4507	0.0012681	1.4091	0.0012317	874.441	14.13	1.1515	14.13	14.025	15.177	0	0	0	0
ATTQAYADYRLEGAHEELLELAR	23	114	178	32	39	0	0	Unmodified	_ATTQAYADYRLEGAHEELLELAR_							0	0	0	0	1	P20260	P20260	P20260	MULTI-MSMS	20260305_P_MTE_gel_TrpDTT_CA_NCE28	20260305_P_MTE_gel_TrpDTT_CA_NCE28.raw	656.083	4	655.831	2619.29	-0.041631	-2.7303e-05	1.9295	0.0012654	1.8879	0.0012381	656.083	14.145	1.1716	14.145	14.019	15.19	0	0	0	0
ATTQAYADYRLEGAHEELLELAR	23	114	178	32	39	0	0	Unmodified	_ATTQAYADYRLEGAHEELLELAR_							0	0	0	0	1	P20260	P20260	P20260	MULTI-MSMS	20260305_P_MTE_gel_TrpDTT_CA_NCE28	20260305_P_MTE_gel_TrpDTT_CA_NCE28.raw	874.44	3	874.105	2619.29	-0.04163	-3.6389e-05	1.3278	0.0011606	1.2861	0.0011242	874.44	15.386	1.8816	15.386	14.653	16.534	0	0	0	0
CFGGNLTFEVAK	12	68	90	14	19	1	0	CA (C)	_C(CA (C))FGGNLTFEVAK_	C(1)FGGNLTFEVAK			C(86)FGGNLTFEVAK			1	0	0	0	0	P20260	P20260	P20260	MULTI-MSMS	20260305_P_MTE_gel_TrpDTT_CA_NCE28	20260305_P_MTE_gel_TrpDTT_CA_NCE28.raw	720.319	2	720.319	1438.62	-0.041634	-2.999e-05	1.2152	0.00087533	1.1736	0.00084534	720.32	22.763	2.3087	22.763	22.524	24.833	0	0	0	0
CFGGNLTFEVAK	12	68	90	14	19	1	0	CA (C)	_C(CA (C))FGGNLTFEVAK_	C(1)FGGNLTFEVAK			C(120)FGGNLTFEVAK			1	0	0	0	0	P20260	P20260	P20260	MULTI-MSMS	20260305_P_MTE_gel_TrpDTT_CA_NCE28	20260305_P_MTE_gel_TrpDTT_CA_NCE28.raw	1439.63	1	1439.63	1438.62	-0.041634	-5.9938e-05	-0.35369	-0.00050918	-0.39532	-0.00056912	1439.63	22.775	1.2995	22.775	22.547	23.847	0	0	0	0
CFPPGSGFGIGYR	13	73	90	16	18	1	0	CA (C)	_C(CA (C))FPPGSGFGIGYR_	C(1)FPPGSGFGIGYR			C(240)FPPGSGFGIGYR			1	0	0	0	0	P20260	P20260	P20260	MULTI-MSMS	20260305_P_MTE_gel_TrpDTT_CA_NCE28	20260305_P_MTE_gel_TrpDTT_CA_NCE28.raw	756.326	2	756.324	1510.63	-0.041634	-3.1489e-05	1.3132	0.00099322	1.2716	0.00096173	756.326	23.426	1.9022	23.426	22.8	24.702	0	0	0	0
CFPPGSGFGIGYR	13	73	90	16	18	1	0	CA (C)	_C(CA (C))FPPGSGFGIGYR_	C(1)FPPGSGFGIGYR			C(180)FPPGSGFGIGYR			1	0	0	0	0	P20260	P20260	P20260	MULTI-MSMS	20260305_P_MTE_gel_TrpDTT_CA_NCE28	20260305_P_MTE_gel_TrpDTT_CA_NCE28.raw	1511.64	1	1511.64	1510.63	-0.041634	-6.2936e-05	-0.068672	-0.00010381	-0.11031	-0.00016674	1511.64	23.428	1.572	23.428	22.833	24.405	0	0	0	0
CFPPGSGFGIGYRELAGR	18	95	128	24	25	1	0	CA (C)	_C(CA (C))FPPGSGFGIGYRELAGR_	C(1)FPPGSGFGIGYRELAGR			C(82)FPPGSGFGIGYRELAGR			1	0	0	0	1	P20260	P20260	P20260	MULTI-MSMS	20260305_P_MTE_gel_TrpDTT_CA_NCE28	20260305_P_MTE_gel_TrpDTT_CA_NCE28.raw	1019.97	2	1019.47	2036.92	-0.041634	-4.2444e-05	1.0422	0.0010625	1.0006	0.00102	1019.97	22.445	1.888	22.445	21.855	23.743	0	0	0	0
DILVQIK	7	38	69	9	11	0	0	Unmodified	_DILVQIK_							0	0	0	0	0	P20260	P20260	P20260	MULTI-MSMS	20260305_P_MTE_gel_TrpDTT_CA_NCE28	20260305_P_MTE_gel_TrpDTT_CA_NCE28.raw	828.52	1	828.519	827.512	-0.041631	-3.4492e-05	1.428	0.0011831	1.3864	0.0011486	828.52	10.766	0.67983	10.766	10.595	11.275	0	0	0	0
DILVQIK	7	38	69	9	11	0	0	Unmodified	_DILVQIK_							0	0	0	0	0	P20260	P20260	P20260	MULTI-MSMS	20260305_P_MTE_gel_TrpDTT_CA_NCE28	20260305_P_MTE_gel_TrpDTT_CA_NCE28.raw	414.764	2	414.763	827.512	-0.041631	-1.7267e-05	2.0255	0.00084011	1.9839	0.00082284	414.764	10.782	0.61097	10.782	10.595	11.206	0	0	0	0
DNFFELGGNSLSLIR	15	75	116	20	24	0	0	Unmodified	_DNFFELGGNSLSLIR_							0	0	0	0	0	P20260	P20260	P20260	MULTI-MSMS	20260305_P_MTE_gel_TrpDTT_CA_NCE28	20260305_P_MTE_gel_TrpDTT_CA_NCE28.raw	841.934	2	841.431	1680.85	-0.041631	-3.503e-05	1.3792	0.0011605	1.3375	0.0011254	841.432	20.159	0.57805	20.159	20.063	20.641	0	0	0	0
DNFFELGGNSLSLIR	15	75	116	20	24	0	0	Unmodified	_DNFFELGGNSLSLIR_							0	0	0	0	0	P20260	P20260	P20260	MULTI-MSMS	20260305_P_MTE_gel_TrpDTT_CA_NCE28	20260305_P_MTE_gel_TrpDTT_CA_NCE28.raw	561.29	3	561.29	1680.85	-0.041631	-2.3367e-05	1.9451	0.0010917	1.9034	0.0010684	561.291	20.171	0.27454	20.171	20.089	20.364	0	0	0	0
DSEAFRLEHQLPSWQR	16	88	131	27	27	0	0	Unmodified	_DSEAFRLEHQLPSWQR_							0	0	0	0	1	P20260	P20260	P20260	MULTI-MSMS	20260305_P_MTE_gel_TrpDTT_CA_NCE28	20260305_P_MTE_gel_TrpDTT_CA_NCE28.raw	666.999	3	666.998	1997.97	-0.041632	-2.7768e-05	0.98238	0.00065524	0.94075	0.00062748	667.332	12.225	1.5479	12.225	11.88	13.428	0	0	0	0
DSEAFRLEHQLPSWQR	16	88	131	27	27	0	0	Unmodified	_DSEAFRLEHQLPSWQR_							0	0	0	0	1	P20260	P20260	P20260	MULTI-SECPEP	20260305_P_MTE_gel_TrpDTT_CA_NCE28	20260305_P_MTE_gel_TrpDTT_CA_NCE28.raw	666.282	3	666.998	1997.97	-0.04163	-2.7767e-05	1.8444	0.0012302	1.8028	0.0012025	666.999	13.641	0.71523	13.641	13.374	14.089	0	0	0	0
DTLTPYETSEK	11	55	86	12	23	0	0	Unmodified	_DTLTPYETSEK_							0	0	0	0	0	P20260	P20260	P20260	MULTI-MSMS	20260305_P_MTE_gel_TrpDTT_CA_NCE28	20260305_P_MTE_gel_TrpDTT_CA_NCE28.raw	642.305	2	642.304	1282.59	-0.041632	-2.674e-05	1.1479	0.00073732	1.1063	0.00071057	642.304	5.5514	0.41089	5.5514	5.3269	5.7377	0	0	0	0
DTLTPYETSEKELEEMLADFDEEEK	25	128	195	27	53	1	0	Unmodified	_DTLTPYETSEKELEEMLADFDEEEK_							0	0	0	0	1	P20260	P20260	P20260	MULTI-MSMS	20260305_P_MTE_gel_TrpDTT_CA_NCE28	20260305_P_MTE_gel_TrpDTT_CA_NCE28.raw	998.113	3	997.778	2990.31	-0.041631	-4.1538e-05	0.34971	0.00034894	0.30808	0.0003074	998.112	23.341	0.2772	23.341	23.24	23.517	0	0	0	0
DTLTPYETSEKELEEMLADFDEEEK	25	128	195	27	53	1	0	Unmodified	_DTLTPYETSEKELEEMLADFDEEEK_							0	0	0	0	1	P20260	P20260	P20260	MULTI-MSMS	20260305_P_MTE_gel_TrpDTT_CA_NCE28	20260305_P_MTE_gel_TrpDTT_CA_NCE28.raw	998.114	3	997.778	2990.31	-0.041632	-4.1539e-05	1.5174	0.0015141	1.4758	0.0014725	998.114	23.84	0.5437	23.84	23.455	23.999	0	0	0	0
DTLTPYETSEKELEEMLADFDEEEKELMSNPLVR	34	173	272	40	66	2	0	Unmodified	_DTLTPYETSEKELEEMLADFDEEEKELMSNPLVR_							0	0	0	0	2	P20260	P20260	P20260	MULTI-MSMS	20260305_P_MTE_gel_TrpDTT_CA_NCE28	20260305_P_MTE_gel_TrpDTT_CA_NCE28.raw	1008.97	4	1008.47	4029.86	-0.041632	-4.1985e-05	1.628	0.0016418	1.5863	0.0015998	1008.98	29.251	0.3665	29.251	29.094	29.461	0	0	0	0
DTLTPYETSEKELEEMLADFDEEEKELMSNPLVR	34	173	272	40	66	2	0	Unmodified	_DTLTPYETSEKELEEMLADFDEEEKELMSNPLVR_							0	0	0	0	2	P20260	P20260	P20260	MULTI-MSMS	20260305_P_MTE_gel_TrpDTT_CA_NCE28	20260305_P_MTE_gel_TrpDTT_CA_NCE28.raw	1344.96	3	1344.29	4029.86	-0.041632	-5.5966e-05	1.3747	0.001848	1.333	0.001792	1344.96	29.245	0.33772	29.245	29.102	29.44	0	0	0	0
EGDLNVF	7	35	52	8	13	0	0	Unmodified	_EGDLNVF_							0	0	0	0	0	P20260	P20260	P20260	MULTI-MSMS	20260305_P_MTE_gel_TrpDTT_CA_NCE28	20260305_P_MTE_gel_TrpDTT_CA_NCE28.raw	793.373	1	793.373	792.365	-0.04163	-3.3028e-05	-0.69576	-0.000552	-0.73739	-0.00058503	793.372	12.397	0.38142	12.397	12.285	12.666	0	0	0	0
EGDLNVF	7	35	52	8	13	0	0	Unmodified	_EGDLNVF_							0	0	0	0	0	P20260	P20260	P20260	MULTI-MSMS	20260305_P_MTE_gel_TrpDTT_CA_NCE28	20260305_P_MTE_gel_TrpDTT_CA_NCE28.raw	793.373	1	793.373	792.365	-0.041629	-3.3028e-05	1.8159	0.0014407	1.7743	0.0014077	793.374	14.698	0.33773	14.698	14.595	14.933	0	0	0	0
ELEEMLADFDEEEK	14	73	111	15	31	1	0	Unmodified	_ELEEMLADFDEEEK_							0	0	0	0	0	P20260	P20260	P20260	MULTI-MSMS	20260305_P_MTE_gel_TrpDTT_CA_NCE28	20260305_P_MTE_gel_TrpDTT_CA_NCE28.raw	863.873	2	863.872	1725.73	-0.041633	-3.5966e-05	1.4116	0.0012194	1.3699	0.0011834	863.873	15.583	0.72864	15.583	15.49	16.219	0	0	0	0
ELEEMLADFDEEEKELMSNPLVR	23	118	188	28	44	2	0	Unmodified	_ELEEMLADFDEEEKELMSNPLVR_							0	0	0	0	1	P20260	P20260	P20260	MULTI-MSMS	20260305_P_MTE_gel_TrpDTT_CA_NCE28	20260305_P_MTE_gel_TrpDTT_CA_NCE28.raw	923.103	3	922.766	2765.28	-0.041633	-3.8418e-05	2.0102	0.0018549	1.9686	0.0018165	923.103	24.45	0.69749	24.45	23.96	24.658	0	0	0	0
ELMSNPLVR	9	45	79	13	14	1	0	Unmodified	_ELMSNPLVR_							0	0	0	0	0	P20260	P20260	P20260	MULTI-MSMS	20260305_P_MTE_gel_TrpDTT_CA_NCE28	20260305_P_MTE_gel_TrpDTT_CA_NCE28.raw	529.788	2	529.787	1057.56	-0.041631	-2.2056e-05	1.1705	0.00062011	1.1289	0.00059805	529.787	11.072	0.52386	11.072	10.884	11.408	0	0	0	0
GSHMASMTGGQQVLPAPEDAATGGTEYVAPR	31	129	204	38	46	2	0	Unmodified	_GSHMASMTGGQQVLPAPEDAATGGTEYVAPR_							0	0	0	0	0	P20260	P20260	P20260	MULTI-MSMS	20260305_P_MTE_gel_TrpDTT_CA_NCE28	20260305_P_MTE_gel_TrpDTT_CA_NCE28.raw	1029.82	3	1029.48	3085.42	-0.041632	-4.286e-05	0.55879	0.00057526	0.51716	0.0005324	1029.82	11.182	1.3332	11.182	10.971	12.304	0	0	0	0
GSHMASMTGGQQVLPAPEDAATGGTEYVAPR	31	129	204	38	46	2	0	Unmodified	_GSHMASMTGGQQVLPAPEDAATGGTEYVAPR_							0	0	0	0	0	P20260	P20260	P20260	MULTI-MSMS	20260305_P_MTE_gel_TrpDTT_CA_NCE28	20260305_P_MTE_gel_TrpDTT_CA_NCE28.raw	772.615	4	772.363	3085.42	-0.041633	-3.2156e-05	1.0813	0.00083516	1.0397	0.00080301	772.615	11.186	0.78141	11.186	11.034	11.815	0	0	0	0
IYELIAK	7	41	68	8	11	0	0	Unmodified	_IYELIAK_							0	0	0	0	0	P20260	P20260	P20260	MULTI-MSMS	20260305_P_MTE_gel_TrpDTT_CA_NCE28	20260305_P_MTE_gel_TrpDTT_CA_NCE28.raw	425.258	2	425.258	848.501	-0.041633	-1.7705e-05	0.9482	0.00040323	0.90656	0.00038552	425.258	9.2457	0.4834	9.2457	9.1588	9.6422	0	0	0	0
LEGAHEELLELAR	13	64	106	18	22	0	0	Unmodified	_LEGAHEELLELAR_							0	0	0	0	0	P20260	P20260	P20260	MULTI-MSMS	20260305_P_MTE_gel_TrpDTT_CA_NCE28	20260305_P_MTE_gel_TrpDTT_CA_NCE28.raw	493.933	3	493.932	1478.77	-0.041631	-2.0563e-05	1.6601	0.00081996	1.6184	0.0007994	493.932	11.84	0.74824	11.84	11.51	12.258	0	0	0	0
LEGAHEELLELAR	13	64	106	18	22	0	0	Unmodified	_LEGAHEELLELAR_							0	0	0	0	0	P20260	P20260	P20260	MULTI-MSMS	20260305_P_MTE_gel_TrpDTT_CA_NCE28	20260305_P_MTE_gel_TrpDTT_CA_NCE28.raw	740.395	2	740.394	1478.77	-0.041629	-3.0822e-05	1.7415	0.0012894	1.6998	0.0012586	740.395	11.812	0.63181	11.812	11.523	12.155	0	0	0	0
LEGGFVLYGIDFIDDATDYDAMLNR	25	127	187	29	42	1	0	Unmodified	_LEGGFVLYGIDFIDDATDYDAMLNR_							0	0	0	0	0	P20260	P20260	P20260	MULTI-MSMS	20260305_P_MTE_gel_TrpDTT_CA_NCE28	20260305_P_MTE_gel_TrpDTT_CA_NCE28.raw	1412.66	2	1412.16	2822.31	-0.041631	-5.879e-05	0.37099	0.00052389	0.32935	0.0004651	1412.66	27.234	0.25475	27.234	27.126	27.38	0	0	0	0
LEHQLPSWQR	10	58	88	18	16	0	0	Unmodified	_LEHQLPSWQR_							0	0	0	0	0	P20260	P20260	P20260	MULTI-MSMS	20260305_P_MTE_gel_TrpDTT_CA_NCE28	20260305_P_MTE_gel_TrpDTT_CA_NCE28.raw	431.895	3	431.895	1292.66	-0.04163	-1.798e-05	1.5153	0.00065447	1.4737	0.00063649	431.895	8.1995	1.8996	8.1995	7.4427	9.3423	0	0	0	0
LVQAVYDETGIEIPLNR	17	86	140	22	28	0	0	Unmodified	_LVQAVYDETGIEIPLNR_							0	0	0	0	0	P20260	P20260	P20260	MULTI-MSMS	20260305_P_MTE_gel_TrpDTT_CA_NCE28	20260305_P_MTE_gel_TrpDTT_CA_NCE28.raw	966.02	2	965.518	1929.02	-0.041631	-4.0196e-05	-0.12734	-0.00012295	-0.16897	-0.00016314	966.019	15.362	1.0488	15.362	15.255	16.304	0	0	0	0
LVQAVYDETGIEIPLNR	17	86	140	22	28	0	0	Unmodified	_LVQAVYDETGIEIPLNR_							0	0	0	0	0	P20260	P20260	P20260	MULTI-MSMS	20260305_P_MTE_gel_TrpDTT_CA_NCE28	20260305_P_MTE_gel_TrpDTT_CA_NCE28.raw	644.35	3	644.014	1929.02	-0.041631	-2.6811e-05	0.42752	0.00027533	0.38589	0.00024852	644.349	15.364	0.86363	15.364	15.255	16.119	0	0	0	0
QQIEAEAGVLHGS	13	56	91	17	21	0	0	Unmodified	_QQIEAEAGVLHGS_							0	0	0	0	0	P20260	P20260	P20260	MULTI-MSMS	20260305_P_MTE_gel_TrpDTT_CA_NCE28	20260305_P_MTE_gel_TrpDTT_CA_NCE28.raw	669.837	2	669.836	1337.66	-0.04163	-2.7885e-05	0.12923	8.6566e-05	0.087605	5.8681e-05	669.837	7.2894	0.14993	7.2894	7.1969	7.3468	0	0	0	0
QQIEAEAGVLHGS	13	56	91	17	21	0	0	Unmodified	_QQIEAEAGVLHGS_							0	0	0	0	0	P20260	P20260	P20260	MULTI-MSMS	20260305_P_MTE_gel_TrpDTT_CA_NCE28	20260305_P_MTE_gel_TrpDTT_CA_NCE28.raw	1338.66	1	1338.66	1337.66	-0.041631	-5.5729e-05	-0.38378	-0.00051375	-0.42541	-0.00056948	1338.66	7.296	0.12341	7.296	7.217	7.3404	0	0	0	0
QVGVKDNFFELGGNSLSLIR	20	98	157	27	30	0	0	Unmodified	_QVGVKDNFFELGGNSLSLIR_							0	0	0	0	1	P20260	P20260	P20260	MULTI-MSMS	20260305_P_MTE_gel_TrpDTT_CA_NCE28	20260305_P_MTE_gel_TrpDTT_CA_NCE28.raw	732.062	3	731.727	2192.16	-0.041631	-3.0463e-05	1.3779	0.0010082	1.3362	0.00097775	732.062	18.685	0.32293	18.685	18.607	18.93	0	0	0	0
QVGVKDNFFELGGNSLSLIR	20	98	157	27	30	0	0	Unmodified	_QVGVKDNFFELGGNSLSLIR_							0	0	0	0	1	P20260	P20260	P20260	MULTI-SECPEP	20260305_P_MTE_gel_TrpDTT_CA_NCE28	20260305_P_MTE_gel_TrpDTT_CA_NCE28.raw	731.459	3	731.727	2192.16	-0.041631	-3.0463e-05	1.2003	0.00087833	1.1587	0.00084787	731.728	19.537	0.99347	19.537	18.93	19.923	0	0	0	0
VDETAVVIR	9	43	76	12	15	0	0	Unmodified	_VDETAVVIR_							0	0	0	0	0	P20260	P20260	P20260	MULTI-MSMS	20260305_P_MTE_gel_TrpDTT_CA_NCE28	20260305_P_MTE_gel_TrpDTT_CA_NCE28.raw	501.286	2	501.285	1000.56	-0.041628	-2.0868e-05	1.9651	0.00098506	1.9234	0.00096419	501.286	6.9594	0.12245	6.9594	6.8736	6.9961	0	0	0	0
VDETAVVIRDILVQIK	16	81	143	21	25	0	0	Unmodified	_VDETAVVIRDILVQIK_							0	0	0	0	1	P20260	P20260	P20260	MULTI-SECPEP	20260305_P_MTE_gel_TrpDTT_CA_NCE28	20260305_P_MTE_gel_TrpDTT_CA_NCE28.raw	605.039	3	604.359	1810.06	-0.041627	-2.5157e-05	0.6521	0.0003941	0.61047	0.00036895	604.36	21.496	0.1644	21.496	21.441	21.605	0	0	0	0
VWQDTLGVR	9	48	76	14	14	0	0	Unmodified	_VWQDTLGVR_							0	0	0	0	0	P20260	P20260	P20260	MULTI-MSMS	20260305_P_MTE_gel_TrpDTT_CA_NCE28	20260305_P_MTE_gel_TrpDTT_CA_NCE28.raw	537.291	2	537.291	1072.57	-0.041631	-2.2368e-05	-0.66749	-0.00035864	-0.70912	-0.000381	537.29	9.7858	0.67031	9.7858	9.5981	10.268	0	0	0	0
YVDEIVR	7	40	64	10	13	0	0	Unmodified	_YVDEIVR_							0	0	0	0	0	P20260	P20260	P20260	MULTI-MSMS	20260305_P_MTE_gel_TrpDTT_CA_NCE28	20260305_P_MTE_gel_TrpDTT_CA_NCE28.raw	447.241	2	447.24	892.465	-0.041631	-1.8619e-05	1.4553	0.00065087	1.4137	0.00063225	447.241	5.9992	0.23336	5.9992	5.8669	6.1003	0	0	0	0
YVDEIVR	7	40	64	10	13	0	0	Unmodified	_YVDEIVR_							0	0	0	0	0	P20260	P20260	P20260	MULTI-MSMS	20260305_P_MTE_gel_TrpDTT_CA_NCE28	20260305_P_MTE_gel_TrpDTT_CA_NCE28.raw	893.473	1	893.473	892.465	-0.041631	-3.7196e-05	0.91096	0.00081391	0.86932	0.00077672	893.473	6.0008	0.22666	6.0008	5.8736	6.1003	0	0	0	0
YVDEIVR	7	40	64	10	13	0	0	Unmodified	_YVDEIVR_							0	0	0	0	0	P20260	P20260	P20260	MULTI-MSMS	20260305_P_MTE_gel_TrpDTT_CA_NCE28	20260305_P_MTE_gel_TrpDTT_CA_NCE28.raw	447.241	2	447.24	892.465	-0.041631	-1.8619e-05	1.9644	0.00087856	1.9228	0.00085994	447.241	6.4593	0.96145	6.4593	6.1912	7.1527	0	0	0	0
[truncated: 30 more columns]
