# Supplementary material for: Protein digestion using a cysteine-specific backbone cleavage reagent
Source: Royal Society of Chemistry journal article supplement (doi:10.1039/d6cb00152a), 2026-05-28
Supplement: d6cb00152a2.pdf [file d6cb00152a2.pdf]

## pH value characterization (24 h)

| Lane               | 1 | 2    | 3     | 4 | 5 | 6 | 7  | 8  | 9        | 10 | 11 | 12 | 13 | 14 |  |
|--------------------|---|------|-------|---|---|---|----|----|----------|----|----|----|----|----|--|
| Buffer(pH)         |   |      | 6     | 7 | 8 | 9 | 10 | 11 | 6        | 7  | 8  | 9  | 10 | 11 |  |
| Denature condition | L | Ctrl | -     |   |   |   |    |    | 8 M Urea |    |    |    |    |    |  |
| Reaction Temp.     |   |      | 25 °C |   |   |   |    |    |          |    |    |    |    |    |  |
| Reaction time (h)  |   |      | 24    |   |   |   |    |    |          |    |    |    |    |    |  |

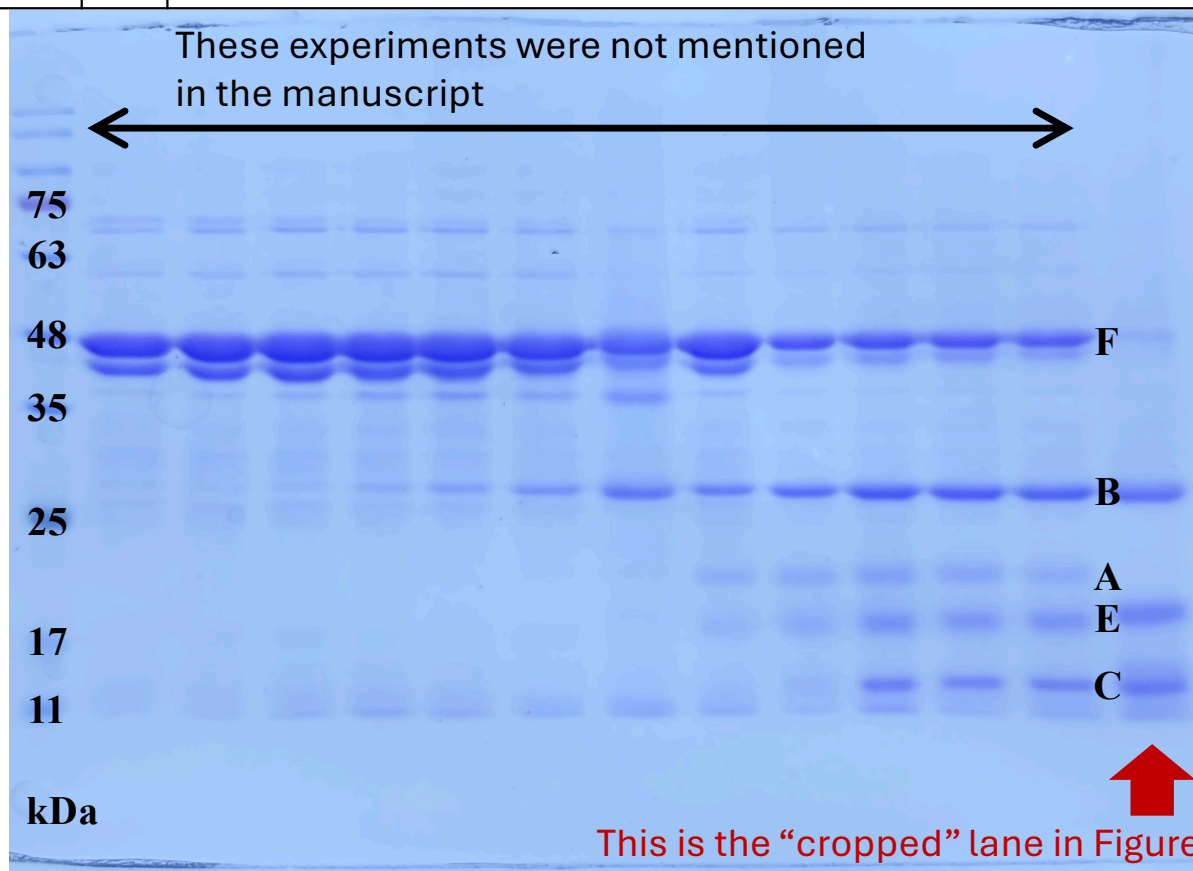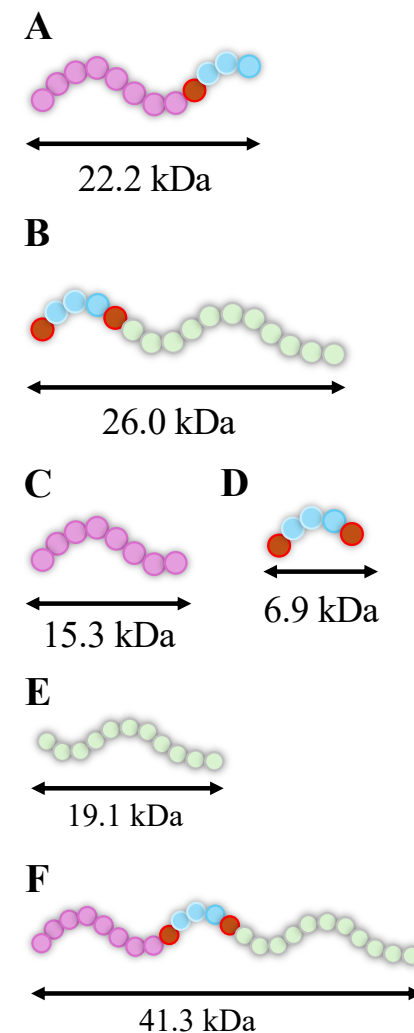

(2/26)

# pH value characterization (24 h)

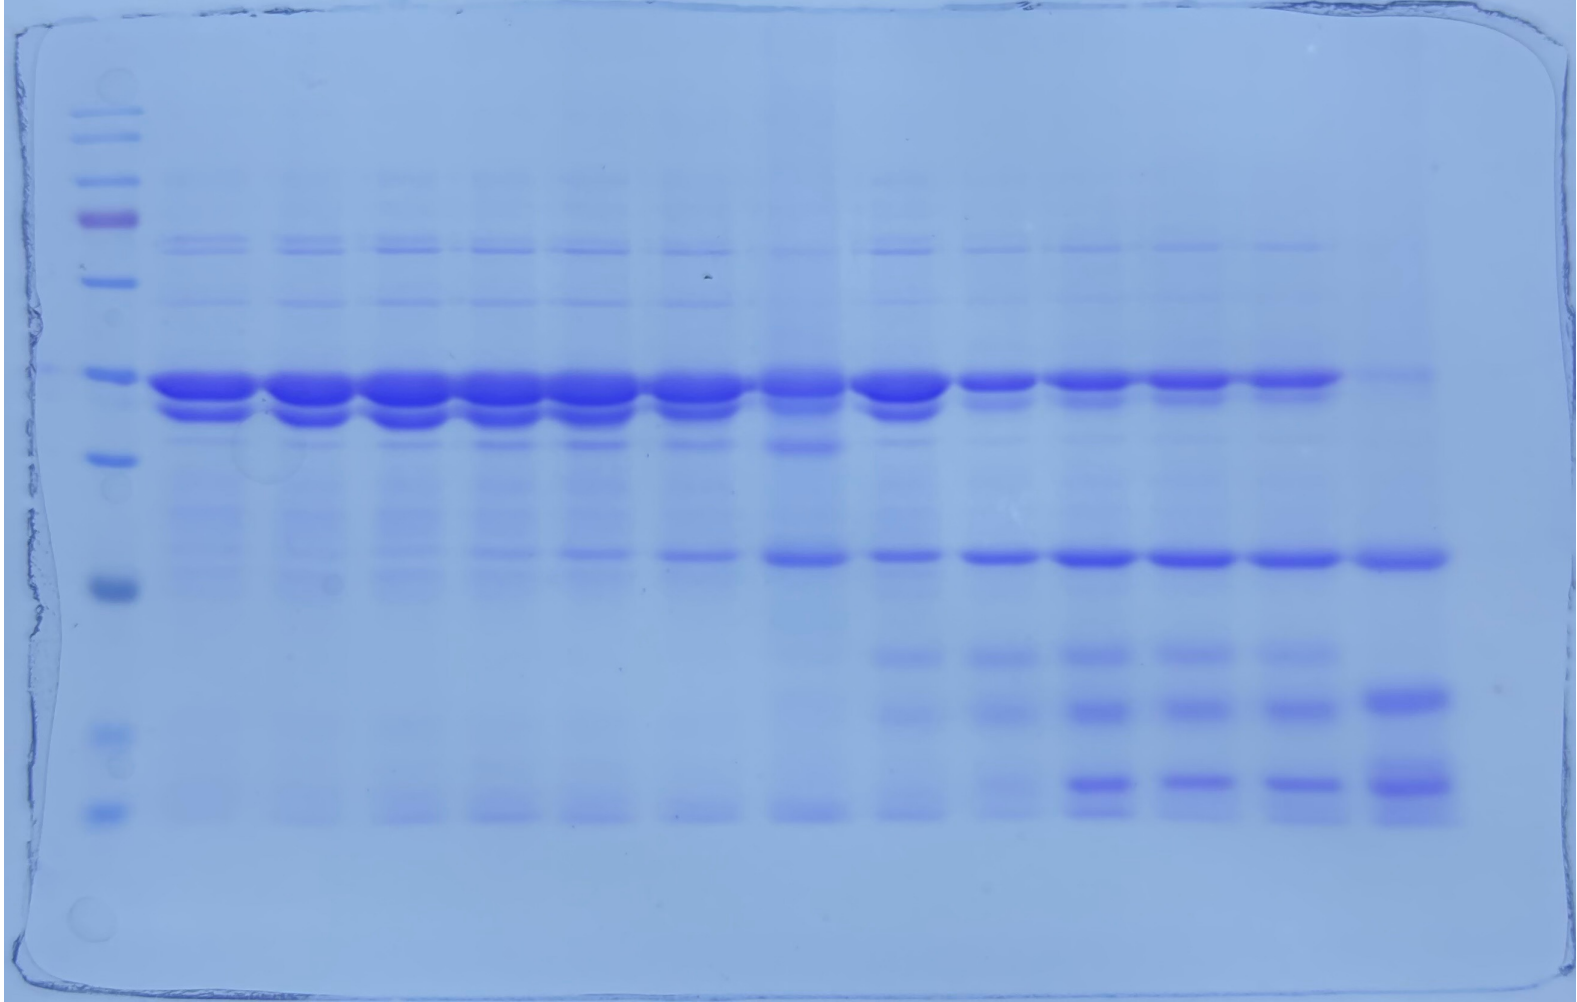

(2/26)
