# Supplementary material for: Protein digestion using a cysteine-specific backbone cleavage reagent
Source: Royal Society of Chemistry journal article supplement (doi:10.1039/d6cb00152a), 2026-05-28
Supplement: d6cb00152a3.pdf [file d6cb00152a3.pdf]

## pH value characterization (24 h)

| Lane               | 1 | 2    | 3     | 4 | 5  | 6        | 7 | 8  |
|--------------------|---|------|-------|---|----|----------|---|----|
| Buffer(pH)         |   |      | 8     | 9 | 10 | 8        | 9 | 10 |
| Denature condition | L | Ctrl | -     |   |    | 8 M Urea |   |    |
| Reaction Temp.     |   |      | 25 °C |   |    |          |   |    |
| Reaction time (h)  |   |      | 24    |   |    |          |   |    |

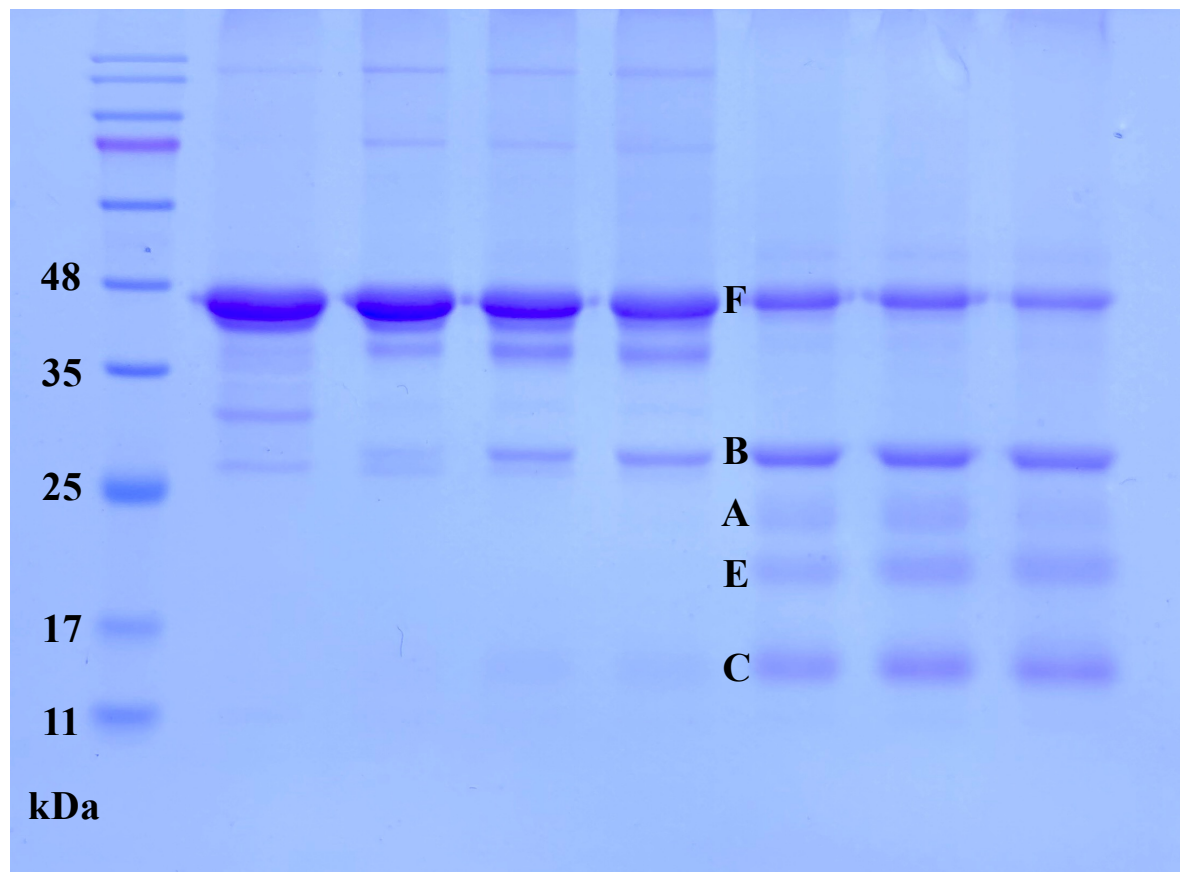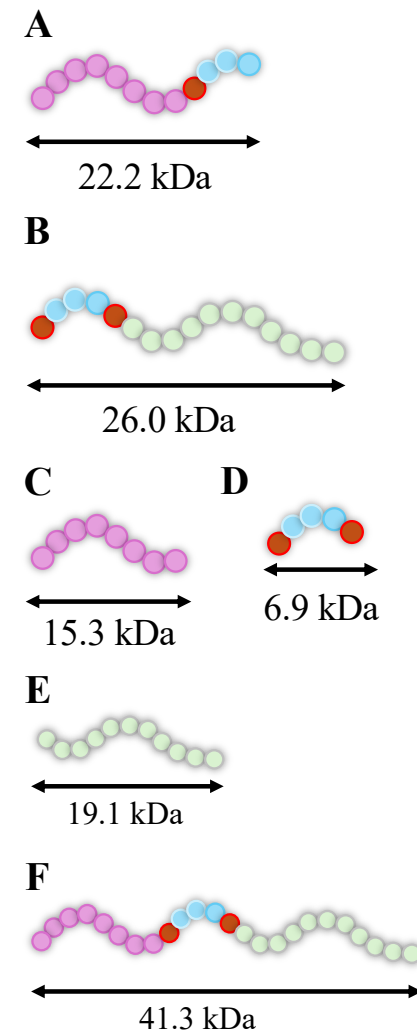

(1/14)

## pH value characterization (24 h)

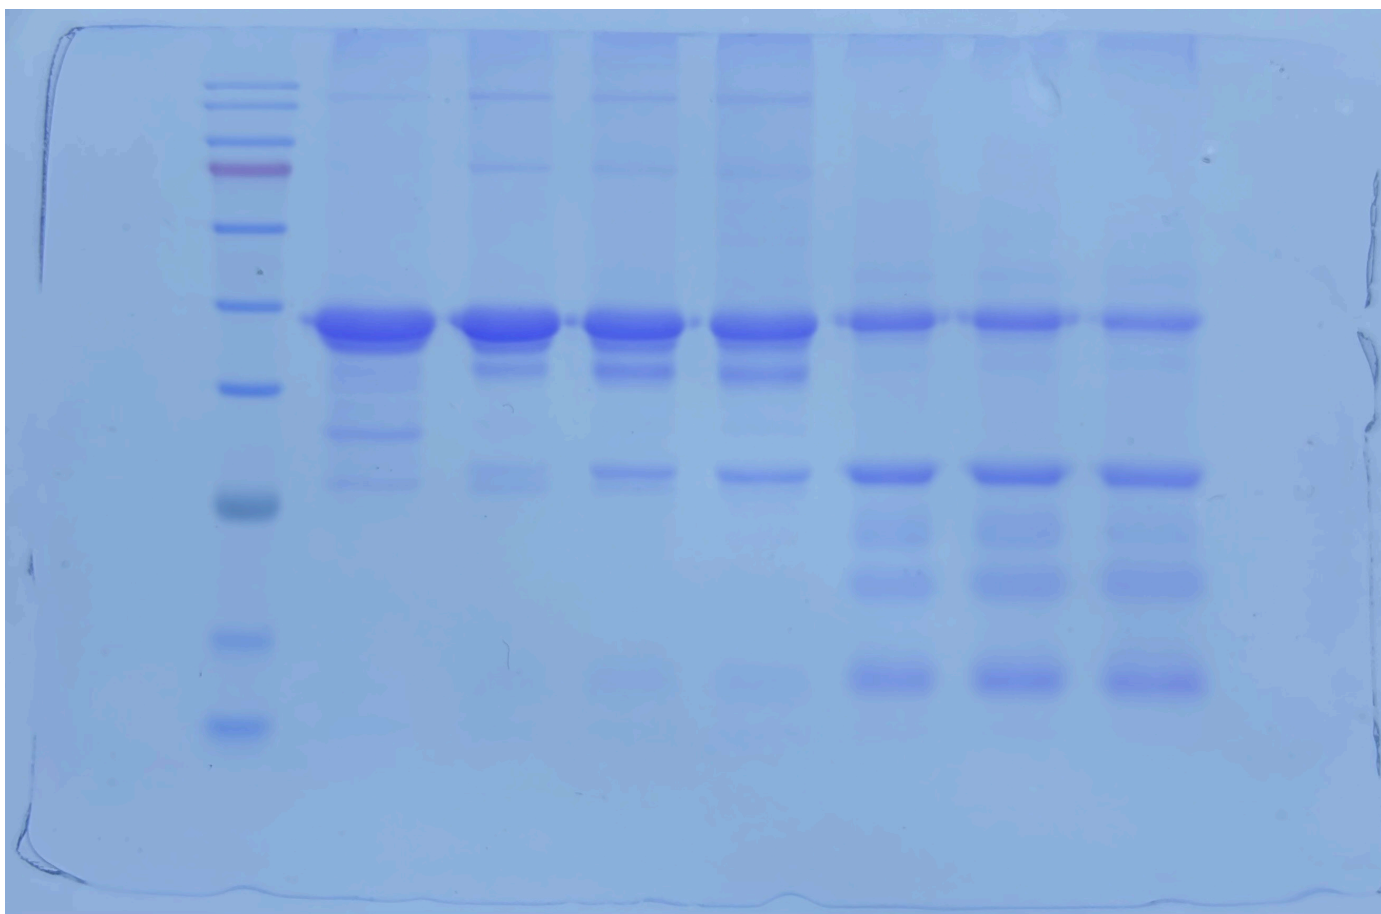

(1/14)
