# Supplementary material for: Protein digestion using a cysteine-specific backbone cleavage reagent
Source: Royal Society of Chemistry journal article supplement (doi:10.1039/d6cb00152a), 2026-05-28

## Denature condition characterization

| Lane               | 1 | 2    | 3     | 4     | 5        | 6       |
|--------------------|---|------|-------|-------|----------|---------|
| Buffer(pH)         |   |      | 10    |       |          |         |
| Denature condition |   |      | -     | 95 °C | 8 M Urea | 10% SDS |
| Reaction Temp.     | L | Ctrl | 25 °C |       |          |         |
| Reaction time (h)  |   |      | 24    |       |          |         |

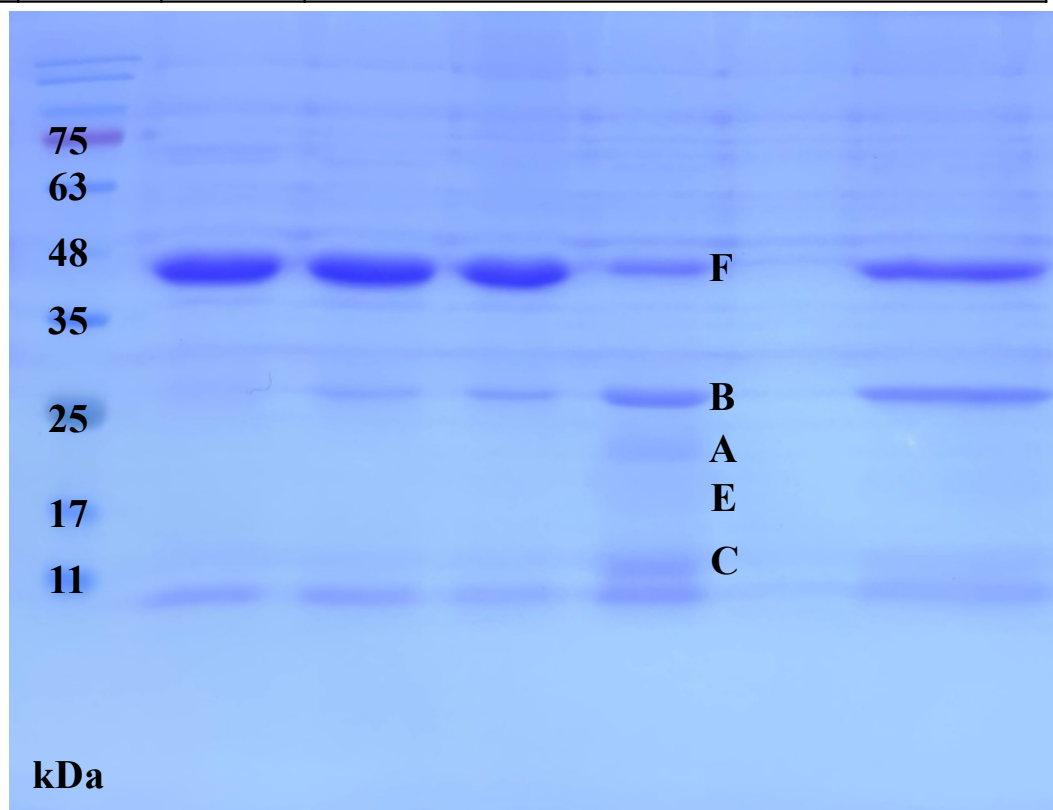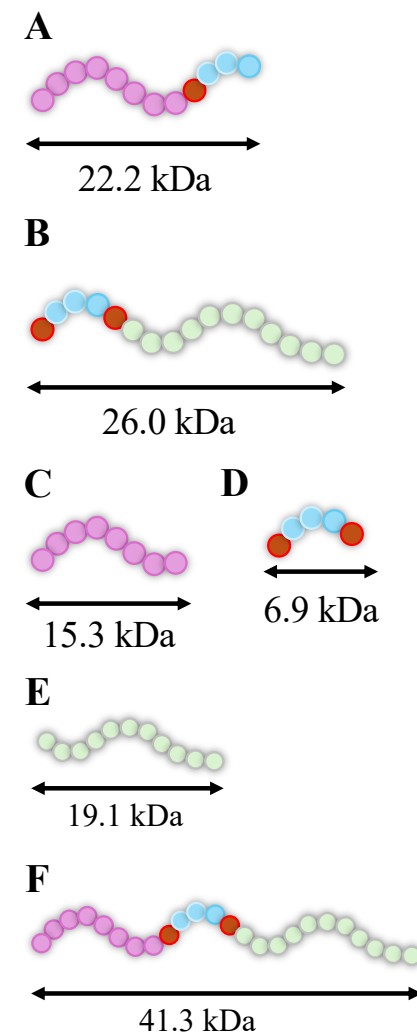

(By Jay)  
 (2/8)

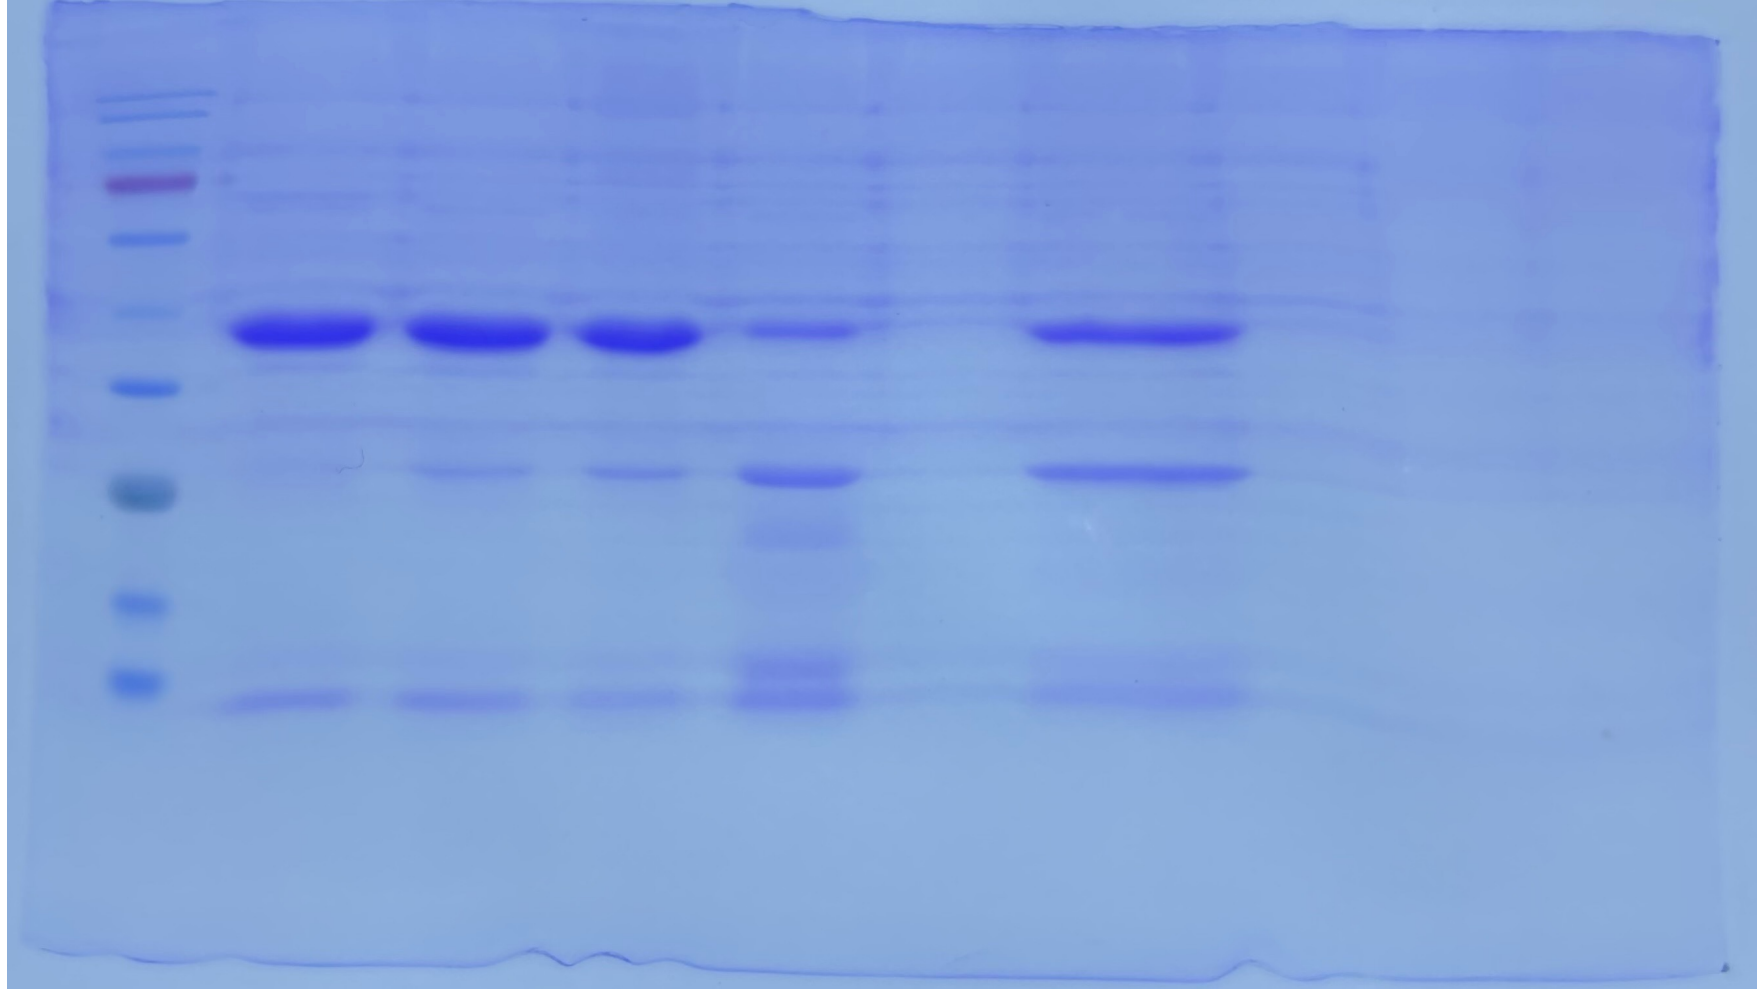

Supplement: d6cb00152a4.pdf [file d6cb00152a4.pdf]
