# Supplementary material for: Protein digestion using a cysteine-specific backbone cleavage reagent
Source: Royal Society of Chemistry journal article supplement (doi:10.1039/d6cb00152a), 2026-05-28
Supplement: d6cb00152a5.xlsx [file d6cb00152a5.xlsx]

## Sheet: Protein_Summary
Entry_PDB	Entry_Name	Total_AA	a. Reagent 1_Sites	b. Trypsin_Sites	c. Chymotrypsin_Sites	d. Trypsin+Chymo_Sites	e. Trypsin+Reagent 1_Sites	f. Chymo+Reagent 1_Sites
A0A1B0GTW7	CIROP_HUMAN	788	29	60	50	110	83	75
A0JNW5	BLT3B_HUMAN	1464	25	151	91	242	175	115
A0JP26	POTB3_HUMAN	581	22	81	20	101	100	40
A0PK11	CLRN2_HUMAN	232	5	16	25	41	21	30
A1A4S6	RHG10_HUMAN	786	11	98	62	160	107	71
A1A519	F170A_HUMAN	330	10	38	15	53	47	24
A1L190	SYCE3_HUMAN	88	1	12	5	17	13	6
A1L3X0	ELOV7_HUMAN	281	6	27	57	84	32	63
A1X283	SPD2B_HUMAN	911	8	112	58	170	120	64
A2A2Y4	FRMD3_HUMAN	597	16	74	56	130	88	71
A2RU14	TM218_HUMAN	115	1	5	15	20	6	16
A2RUB6	CCD66_HUMAN	948	16	146	41	187	160	56
A2RUC4	TYW5_HUMAN	315	3	43	35	78	46	38
A3KN83	SBNO1_HUMAN	1393	12	175	89	264	185	100
A4D1B5	GSAP_HUMAN	854	22	79	80	159	98	101
A4GXA9	EME2_HUMAN	379	9	38	17	55	47	25
A5D8V7	ODAD3_HUMAN	595	3	104	24	128	107	27
A5PLL7	PEDS1_HUMAN	270	8	22	29	51	30	34
A6BM72	MEG11_HUMAN	1044	146	59	75	134	192	217
A6H8Y1	BDP1_HUMAN	2624	29	341	72	413	369	101
A6NCS4	NKX26_HUMAN	301	6	38	18	56	43	24
A6NFY7	SDHF1_HUMAN	115	1	19	5	24	20	6
A6NGG8	PCARE_HUMAN	1288	30	136	46	182	164	73
A6NI61	MYMK_HUMAN	221	8	20	30	50	28	38
A6NKB5	PCX2_HUMAN	2137	50	187	164	351	235	204
A6NNB3	IFM5_HUMAN	132	3	14	12	26	16	15
A6QL63	ABTB3_HUMAN	1104	31	100	69	169	129	98
A7E2V4	ZSWM8_HUMAN	1837	38	153	110	263	188	144
A7MCY6	TBKB1_HUMAN	615	16	62	26	88	77	41
A7MD48	SRRM4_HUMAN	611	8	145	27	172	151	35
A7XYQ1	SOBP_HUMAN	873	22	77	30	107	96	48
A8MQ03	CRTP1_HUMAN	144	17	7	5	12	23	21
A8MW99	MEI4_HUMAN	385	6	38	33	71	43	39
A9UHW6	MI4GD_HUMAN	222	6	24	20	44	30	26
B1AK53	ESPN_HUMAN	854	16	84	30	114	99	46
B2RUY7	VWC2L_HUMAN	222	27	17	14	31	42	39
B3KU38	IQIP1_HUMAN	563	8	65	18	83	73	26
B6A8C7	TARM1_HUMAN	271	6	21	23	44	26	29
B7U540	KCJ18_HUMAN	433	10	44	41	85	51	50
C9JRZ8	AK1BF_HUMAN	316	3	37	33	70	40	35
D3W0D1	KLRF2_HUMAN	207	9	16	29	45	23	37
O00115	DNS2A_HUMAN	360	9	26	38	64	35	46
O00116	ADAS_HUMAN	658	14	74	56	130	87	69
O00159	MYO1C_HUMAN	1063	15	149	92	241	162	104
O00161	SNP23_HUMAN	211	6	27	4	31	32	10
O00168	PLM_HUMAN	92	3	13	7	20	14	9
O00214	LEG8_HUMAN	317	3	36	28	64	39	30
O00237	RN103_HUMAN	685	18	66	88	154	83	104
O00254	PAR3_HUMAN	374	14	21	60	81	34	70
O00268	TAF4_HUMAN	1085	5	82	22	104	86	26
O00291	HIP1_HUMAN	1037	19	123	51	174	142	69
O00300	TR11B_HUMAN	401	25	52	32	84	74	55
O00322	UPK1A_HUMAN	258	10	15	34	49	25	43
O00329	PK3CD_HUMAN	1044	30	118	86	204	147	112
O00330	ODPX_HUMAN	501	4	59	23	82	63	27
O00337	S28A1_HUMAN	649	20	49	68	117	69	87
O00400	ACATN_HUMAN	549	9	43	66	109	51	73
O00409	FOXN3_HUMAN	490	9	54	28	82	62	36
O00422	SAP18_HUMAN	153	1	22	11	33	23	12
O00444	PLK4_HUMAN	970	13	106	77	183	117	90
O00453	LST1_HUMAN	97	4	13	5	18	17	9
O00462	MANBA_HUMAN	879	17	69	115	184	85	132
O00478	BT3A3_HUMAN	584	9	59	47	106	68	55
O00487	PSDE_HUMAN	310	3	29	18	47	32	21
O00505	IMA4_HUMAN	521	9	42	28	70	50	36
O00506	STK25_HUMAN	426	4	51	32	83	55	36
O00507	USP9Y_HUMAN	2555	61	252	221	473	305	281
O00560	SDCB1_HUMAN	298	3	28	12	40	31	15
O00591	GBRP_HUMAN	440	7	40	59	99	47	66
O00622	CCN1_HUMAN	381	38	49	21	70	81	58
O00624	NPT3_HUMAN	439	11	23	46	69	34	56
O00635	TRI38_HUMAN	465	22	55	38	93	74	57
O00712	NFIB_HUMAN	420	6	47	30	77	53	36
O00746	NDKD_HUMAN	187	1	21	14	35	21	15
O00748	EST2_HUMAN	559	6	40	49	89	46	55
O00762	UBE2C_HUMAN	179	2	18	13	31	20	15
O14497	ARI1A_HUMAN	2285	16	147	112	259	161	128
O14503	BHE40_HUMAN	412	8	47	19	66	54	25
O14508	SOCS2_HUMAN	198	5	25	17	42	28	22
O14519	CDKA1_HUMAN	115	1	11	6	17	12	7
O14524	NEMP1_HUMAN	444	14	42	52	94	54	63
O14548	CO72L_HUMAN	114	1	12	15	27	13	15
O14561	ACPM_HUMAN	156	3	15	10	25	18	13
O14613	BORG1_HUMAN	210	1	16	10	26	17	11
O14618	CCS_HUMAN	274	9	22	8	30	30	17
O14628	ZN195_HUMAN	629	40	76	60	136	102	100
O14638	ENPP3_HUMAN	875	34	81	89	170	111	121
O14640	DVL1_HUMAN	695	7	75	41	116	81	48
O14654	IRS4_HUMAN	1257	18	140	79	219	154	95
O14657	TOR1B_HUMAN	336	6	40	34	74	46	39
O14744	ANM5_HUMAN	637	12	61	63	124	71	73
O14756	H17B6_HUMAN	317	6	33	33	66	39	38
O14757	CHK1_HUMAN	476	10	63	42	105	73	51
O14763	TR10B_HUMAN	440	18	47	17	64	62	34
O14788	TNF11_HUMAN	317	4	33	33	66	37	37
O14804	TAAR5_HUMAN	337	14	23	49	72	37	61
O14813	PHX2A_HUMAN	284	6	29	21	50	34	27
O14843	FFAR3_HUMAN	346	11	23	42	65	34	52
O14908	GIPC1_HUMAN	333	2	41	20	61	43	21
O14910	LIN7A_HUMAN	233	2	29	9	38	31	10
O14925	TIM23_HUMAN	209	3	15	18	33	17	21
O14926	FSCN2_HUMAN	492	12	60	48	108	71	59
O14933	UB2L6_HUMAN	153	3	14	11	25	17	14
O14939	PLD2_HUMAN	933	14	103	88	191	115	101
O14958	CASQ2_HUMAN	399	2	39	44	83	41	46
O14960	LECT2_HUMAN	151	6	15	11	26	21	16
O14967	CLGN_HUMAN	610	8	63	57	120	70	64
O14975	S27A2_HUMAN	620	14	74	71	145	88	84
O14979	HNRDL_HUMAN	420	3	58	41	99	60	43
O14994	SYN3_HUMAN	580	4	50	36	86	54	39
O15067	PUR4_HUMAN	1338	29	110	86	196	136	112
O15078	CE290_HUMAN	2479	12	439	81	520	451	93
O15111	IKKA_HUMAN	745	20	75	52	127	93	70
O15119	TBX3_HUMAN	743	7	70	46	116	76	53
O15120	PLCB_HUMAN	278	7	27	26	53	33	32
O15127	SCAM2_HUMAN	329	8	17	44	61	25	50
O15156	ZBT7B_HUMAN	539	16	46	26	72	62	42
O15162	PLS1_HUMAN	318	18	18	24	42	35	42
O15169	AXIN1_HUMAN	862	16	110	51	161	124	65
O15230	LAMA5_HUMAN	3695	220	308	224	532	491	434
O15232	MATN3_HUMAN	486	28	48	25	73	73	52
O15245	S22A1_HUMAN	554	16	39	57	96	54	72
O15247	CLIC2_HUMAN	247	5	32	26	58	37	30
O15259	NPHP1_HUMAN	732	10	80	52	132	89	60
O15260	SURF4_HUMAN	269	4	19	38	57	23	42
O15263	DFB4A_HUMAN	64	6	7	8	15	12	13
O15265	ATX7_HUMAN	892	20	94	28	122	112	46
O15266	SHOX_HUMAN	292	4	40	15	55	43	19
O15269	SPTC1_HUMAN	473	10	53	37	90	61	45
O15297	PPM1D_HUMAN	605	13	76	30	106	88	43
O15318	RPC7_HUMAN	223	1	36	18	54	36	19
O15370	SOX12_HUMAN	315	3	37	14	51	40	15
O15389	SIGL5_HUMAN	551	16	46	42	88	61	58
O15399	NMDE4_HUMAN	1336	25	121	107	228	143	130
O15400	STX7_HUMAN	261	2	31	11	42	33	13
O15446	RPA34_HUMAN	510	5	71	10	81	76	14
O15484	CAN5_HUMAN	640	17	78	62	140	93	77
O15488	GLYG2_HUMAN	501	10	34	39	73	43	48
O15511	ARPC5_HUMAN	151	1	20	8	28	21	9
O15520	FGF10_HUMAN	208	9	28	22	50	37	31
O15533	TPSN_HUMAN	448	6	30	30	60	36	36
O15540	FABP7_HUMAN	132	2	16	12	28	18	13
O15541	R113A_HUMAN	343	13	48	28	76	58	39
O15551	CLD3_HUMAN	220	9	15	17	32	24	26
O15554	KCNN4_HUMAN	427	9	49	31	80	57	40
O42043	ENK18_HUMAN	560	18	46	45	91	62	61
O43143	DHX15_HUMAN	795	14	104	56	160	117	68
O43155	FLRT2_HUMAN	660	15	58	48	106	72	58
O43166	SI1L1_HUMAN	1804	21	215	120	335	235	140
O43172	PRP4_HUMAN	522	12	65	40	105	75	50
O43196	MSH5_HUMAN	834	15	81	59	140	95	74
O43237	DC1L2_HUMAN	492	5	56	31	87	59	35
O43264	ZW10_HUMAN	779	15	90	51	141	102	65
O43294	TGFI1_HUMAN	461	27	35	36	71	59	57
O43310	CTIF_HUMAN	598	10	73	33	106	83	43
O43323	DHH_HUMAN	396	6	49	28	77	54	34
O43395	PRPF3_HUMAN	683	3	120	33	153	122	36
O43439	MTG8R_HUMAN	604	14	68	29	97	81	41
O43464	HTRA2_HUMAN	458	1	47	22	69	48	23
O43474	KLF4_HUMAN	513	14	44	29	73	57	43
O43521	B2L11_HUMAN	198	4	19	16	35	23	20
O43525	KCNQ3_HUMAN	872	8	103	77	180	111	85
O43526	KCNQ2_HUMAN	872	20	107	75	182	127	94
O43529	CHSTA_HUMAN	356	6	47	46	93	53	51
O43543	XRCC2_HUMAN	280	12	27	27	54	36	35
O43548	TGM5_HUMAN	720	17	63	68	131	79	83
O43556	SGCE_HUMAN	437	7	40	37	77	46	43
O43566	RGS14_HUMAN	566	9	60	26	86	69	34
O43581	SYT7_HUMAN	403	6	59	29	88	65	34
O43593	HAIR_HUMAN	1189	45	104	62	166	142	105
O43598	DNPH1_HUMAN	174	2	18	14	32	20	15
O43603	GALR2_HUMAN	387	16	32	35	67	48	50
O43609	SPY1_HUMAN	319	26	35	13	48	57	38
O43715	TRIA1_HUMAN	76	4	11	8	19	15	12
O43719	HTSF1_HUMAN	755	10	103	51	154	112	60
O43761	SNG3_HUMAN	229	4	16	29	45	19	32
O43763	TLX2_HUMAN	284	1	32	16	48	33	17
O43808	PM34_HUMAN	307	2	37	28	65	39	30
O43818	U3IP2_HUMAN	475	11	61	26	87	72	37
O43823	AKAP8_HUMAN	692	10	84	54	138	94	64
O43825	B3GT2_HUMAN	422	8	50	52	102	57	58
O43826	G6PT1_HUMAN	429	7	28	56	84	35	63
O43827	ANGL7_HUMAN	346	9	40	39	79	48	47
O43854	EDIL3_HUMAN	480	24	51	44	95	73	68
O43865	SAHH2_HUMAN	530	19	61	38	99	79	54
O43866	CD5L_HUMAN	347	27	34	23	57	57	50
O43868	S28A2_HUMAN	658	20	48	71	119	67	90
O43897	TLL1_HUMAN	1013	40	110	103	213	148	139
O43903	GAS2_HUMAN	313	11	44	19	63	54	28
O43913	ORC5_HUMAN	435	9	48	46	94	56	54
O43914	TYOBP_HUMAN	113	3	9	6	15	12	9
O60235	TM11D_HUMAN	418	9	35	34	69	44	43
O60264	SMCA5_HUMAN	1052	12	162	86	248	171	96
O60266	ADCY3_HUMAN	1144	21	113	105	218	133	125
O60281	ZN292_HUMAN	2723	86	310	151	461	383	231
O60284	ST18_HUMAN	1047	31	121	37	158	146	67
O60307	MAST3_HUMAN	1309	14	150	74	224	164	87
O60315	ZEB2_HUMAN	1214	26	138	67	205	160	90
O60381	HBP1_HUMAN	514	16	51	40	91	66	54
O60393	NOBOX_HUMAN	691	18	58	30	88	75	46
O60449	LY75_HUMAN	1722	64	174	211	385	227	271
O60469	DSCAM_HUMAN	2012	31	197	147	344	224	176
O60481	ZIC3_HUMAN	467	10	40	34	74	49	44
O60502	OGA_HUMAN	916	19	88	82	170	106	96
O60519	CRBL2_HUMAN	120	3	27	5	32	30	7
O60548	FOXD2_HUMAN	495	9	32	29	61	41	38
O60568	PLOD3_HUMAN	738	10	76	80	156	86	87
O60635	TSN1_HUMAN	241	11	13	32	45	22	41
O60636	TSN2_HUMAN	221	11	19	27	46	29	38
O60667	FCMR_HUMAN	390	6	44	27	71	49	33
O60678	ANM3_HUMAN	531	12	54	49	103	66	60
O60682	MUSC_HUMAN	206	4	28	7	35	31	11
O60687	SRPX2_HUMAN	465	22	53	43	96	70	63
O60706	ABCC9_HUMAN	1549	25	140	141	281	164	161
O60729	CC14B_HUMAN	498	14	68	52	120	81	64
O60741	HCN1_HUMAN	890	11	81	74	155	92	84
O60759	CYTIP_HUMAN	359	8	41	23	64	49	30
O60784	TOM1_HUMAN	492	5	45	20	65	50	25
O60831	PRAF2_HUMAN	178	6	17	11	28	22	16
O60879	DIAP2_HUMAN	1101	13	154	65	219	167	78
O60882	MMP20_HUMAN	483	3	53	56	109	55	59
O60884	DNJA2_HUMAN	412	11	55	26	81	63	37
O60909	B4GT2_HUMAN	372	7	42	36	78	48	43
O60921	HUS1_HUMAN	280	7	31	15	46	38	21
O60930	RNH1_HUMAN	286	5	39	26	65	44	31
O60938	KERA_HUMAN	352	7	34	29	63	41	34
O60939	SCN2B_HUMAN	215	6	24	17	41	29	23
O60941	DTNB_HUMAN	627	15	72	35	107	84	49
O60942	MCE1_HUMAN	597	16	79	53	132	92	67
O75019	LIRA1_HUMAN	489	11	34	40	74	41	50
O75022	LIRB3_HUMAN	631	9	50	49	99	55	57
O75072	FKTN_HUMAN	461	9	57	62	119	66	70
O75077	ADA23_HUMAN	832	45	85	63	148	125	105
O75132	ZBED4_HUMAN	1171	30	128	76	204	155	104
O75151	PHF2_HUMAN	1096	17	153	67	220	168	82
O75159	SOCS5_HUMAN	536	16	72	40	112	84	56
O75175	CNOT3_HUMAN	753	4	78	46	124	81	50
O75177	CREST_HUMAN	396	2	9	32	41	11	34
O75190	DNJB6_HUMAN	326	1	49	35	84	50	36
O75191	XYLB_HUMAN	536	13	41	46	87	53	58
O75309	CAD16_HUMAN	829	9	53	48	101	61	57
O75319	DUS11_HUMAN	330	6	46	36	82	51	42
O75334	LIPA2_HUMAN	1257	9	181	44	225	189	53
O75339	CILP1_HUMAN	1184	40	142	97	239	175	134
O75344	FKBP6_HUMAN	327	8	41	31	72	48	38
O75365	TP4A3_HUMAN	173	6	25	13	38	30	18
O75367	H2AY_HUMAN	369	3	58	17	75	60	20
O75369	FLNB_HUMAN	2602	38	241	185	426	274	222
O75376	NCOR1_HUMAN	2440	16	284	98	382	300	114
O75379	VAMP4_HUMAN	141	1	24	8	32	25	9
O75390	CISY_HUMAN	466	4	46	38	84	50	42
O75396	SC22B_HUMAN	215	3	26	22	48	28	25
O75438	NDUB1_HUMAN	58	1	9	6	15	10	7
O75443	TECTA_HUMAN	2155	146	170	236	406	303	367
O75449	KTNA1_HUMAN	491	5	71	34	105	75	39
O75469	NR1I2_HUMAN	434	16	56	36	92	70	51
O75475	PSIP1_HUMAN	530	2	102	16	118	103	18
O75486	SUPT3_HUMAN	317	5	39	22	61	44	26
O75503	CLN5_HUMAN	358	7	34	56	90	41	59
O75554	WBP4_HUMAN	376	3	59	28	87	61	29
O75558	STX11_HUMAN	287	8	44	15	59	52	22
O75564	JERKY_HUMAN	556	12	67	45	112	76	56
O75594	PGRP1_HUMAN	196	7	16	16	32	23	22
O75610	LFTY1_HUMAN	366	9	40	23	63	47	32
O75618	DEDD_HUMAN	318	8	48	20	68	55	27
O75628	REM1_HUMAN	298	5	40	14	54	44	19
O75629	CREG1_HUMAN	220	2	18	19	37	20	20
O75638	CTAG2_HUMAN	210	3	23	6	29	25	9
O75648	MTU1_HUMAN	421	10	51	43	94	61	53
O75674	TM1L1_HUMAN	476	3	39	24	63	42	27
O75679	RFPL3_HUMAN	317	16	32	19	51	47	35
O75683	SURF6_HUMAN	361	2	99	9	108	101	11
O75752	B3GL1_HUMAN	331	6	32	51	83	38	55
O75762	TRPA1_HUMAN	1119	28	112	96	208	136	119
O75781	PALM_HUMAN	387	3	50	5	55	51	8
O75807	PR15A_HUMAN	674	8	68	37	105	76	44
O75815	BCAR3_HUMAN	825	17	94	50	144	109	66
O75821	EIF3G_HUMAN	320	5	45	21	66	48	26
O75828	CBR3_HUMAN	277	7	34	14	48	41	21
O75838	CIB2_HUMAN	187	4	20	21	41	24	25
O75864	PPR37_HUMAN	691	12	67	22	89	79	34
O75879	GATB_HUMAN	557	8	66	29	95	73	37
O75882	ATRN_HUMAN	1429	88	123	138	261	200	217
O75884	RBBP9_HUMAN	186	4	18	20	38	22	24
O75897	ST1C4_HUMAN	302	3	41	36	77	44	39
O75928	PIAS2_HUMAN	621	17	58	32	90	74	47
O75935	DCTN3_HUMAN	186	2	22	10	32	24	12
O75952	CABYR_HUMAN	493	3	35	17	52	38	20
O75956	CDKA2_HUMAN	126	1	9	7	16	10	8
O75969	AKAP3_HUMAN	853	13	100	54	154	112	67
O76027	ANXA9_HUMAN	345	4	37	20	57	40	24
O76039	CDKL5_HUMAN	960	6	123	56	179	128	61
O76074	PDE5A_HUMAN	875	25	95	66	161	119	88
O76075	DFFB_HUMAN	338	11	49	30	79	60	41
O76093	FGF18_HUMAN	207	6	35	19	54	41	25
O77932	DXO_HUMAN	396	8	40	43	83	48	49
O94762	RECQ5_HUMAN	991	30	129	66	195	157	91
O94768	ST17B_HUMAN	372	10	35	28	63	45	38
O94805	ACL6B_HUMAN	426	8	40	34	74	47	42
O94808	GFPT2_HUMAN	682	14	86	49	135	98	62
O94810	RGS11_HUMAN	467	9	56	41	97	65	48
O94818	NOL4_HUMAN	638	7	78	38	116	85	44
O94876	TMCC1_HUMAN	653	7	74	30	104	80	37
O94889	KLH18_HUMAN	574	22	45	48	93	62	69
O94898	LRIG2_HUMAN	1065	25	85	73	158	110	96
O94901	SUN1_HUMAN	785	12	74	63	137	83	75
O94923	GLCE_HUMAN	617	6	74	71	145	77	77
O94964	MTCL2_HUMAN	1661	31	225	72	297	253	103
O94983	CMTA2_HUMAN	1202	24	122	76	198	139	98
O94985	CSTN1_HUMAN	981	22	85	70	155	106	92
O94993	SOX30_HUMAN	753	7	59	41	100	66	48
O95047	OR2A4_HUMAN	310	12	22	32	54	34	42
O95049	ZO3_HUMAN	919	2	114	48	162	116	50
O95125	ZN202_HUMAN	648	24	66	42	108	86	65
O95153	RIMB1_HUMAN	1857	41	189	64	253	223	102
O95154	ARK73_HUMAN	331	7	31	33	64	38	40
O95155	UBE4B_HUMAN	1302	24	133	98	231	152	121
O95169	NDUB8_HUMAN	186	2	20	20	40	22	22
O95208	EPN2_HUMAN	641	4	55	32	87	59	36
O95237	LRAT_HUMAN	230	4	23	21	44	27	23
O95248	MTMR5_HUMAN	1868	37	198	134	332	231	165
O95260	ATE1_HUMAN	518	16	64	51	115	77	65
O95274	LYPD3_HUMAN	346	19	28	13	41	44	31
O95294	RASL1_HUMAN	804	16	96	55	151	109	70
O95298	NDUC2_HUMAN	119	1	18	17	35	19	17
O95342	ABCBB_HUMAN	1321	20	130	124	254	149	142
O95343	SIX3_HUMAN	332	5	37	21	58	42	26
O95352	ATG7_HUMAN	703	20	65	63	128	82	81
O95361	TRI16_HUMAN	564	17	62	47	109	79	59
O95373	IPO7_HUMAN	1038	23	86	87	173	107	108
O95393	BMP10_HUMAN	424	9	43	34	77	52	41
O95394	AGM1_HUMAN	542	8	53	40	93	60	46
O95415	BRI3_HUMAN	125	8	8	12	20	15	20
O95427	PIGN_HUMAN	931	10	74	124	198	84	133
O95429	BAG4_HUMAN	457	4	29	31	60	33	35
O95447	LCA5L_HUMAN	670	7	120	29	149	127	36
O95466	FMNL1_HUMAN	1100	13	124	63	187	137	76
O95470	SGPL1_HUMAN	568	10	68	58	126	77	67
O95479	G6PE_HUMAN	791	10	70	72	142	79	82
O95497	VNN1_HUMAN	513	13	34	55	89	46	68
O95528	GTR10_HUMAN	541	10	33	47	80	43	56
O95544	NADK_HUMAN	446	12	44	31	75	56	41
O95571	ETHE1_HUMAN	254	9	23	15	38	31	24
O95622	ADCY5_HUMAN	1261	34	122	98	220	155	130
O95630	STABP_HUMAN	424	10	48	26	74	58	34
O95670	VATG2_HUMAN	118	1	21	3	24	22	4
O95674	CDS2_HUMAN	445	10	35	70	105	43	79
O95714	HERC2_HUMAN	4834	116	473	280	753	580	386
O95741	CPNE6_HUMAN	557	16	52	48	100	65	64
O95750	FGF19_HUMAN	216	5	21	18	39	26	23
O95758	PTBP3_HUMAN	552	5	49	35	84	54	40
O95782	AP2A1_HUMAN	977	19	102	67	169	121	86
O95793	STAU1_HUMAN	577	5	66	26	92	70	31
O95807	TM50A_HUMAN	157	4	10	25	35	13	29
O95835	LATS1_HUMAN	1130	9	117	74	191	124	83
O95843	GUC1C_HUMAN	209	1	22	20	42	23	21
O95876	FRITZ_HUMAN	746	20	86	58	144	105	75
O95881	TXD12_HUMAN	172	3	17	15	32	20	17
O95886	DLGP3_HUMAN	979	17	121	54	175	136	68
O95905	ECD_HUMAN	644	11	62	51	113	71	60
O95907	MOT3_HUMAN	504	11	32	39	71	42	49
O95944	NCTR2_HUMAN	276	7	22	21	43	28	25
O95977	S1PR4_HUMAN	384	14	37	35	72	50	47
O95990	F107A_HUMAN	144	1	29	5	34	30	6
O95996	APCL_HUMAN	2303	38	260	69	329	290	104
O96000	NDUBA_HUMAN	172	5	29	17	46	33	22
O96004	HAND1_HUMAN	215	2	29	12	41	30	14
O96005	CLPT1_HUMAN	669	4	59	85	144	63	88
P00338	LDHA_HUMAN	332	5	39	20	59	44	25
P00374	DYR_HUMAN	187	1	24	15	39	25	16
P00480	OTC_HUMAN	354	3	39	30	69	41	33
P00505	AATM_HUMAN	430	7	47	40	87	54	45
P00519	ABL1_HUMAN	1130	14	133	69	202	147	81
P01011	AACT_HUMAN	423	3	41	37	78	44	39
P01185	NEU2_HUMAN	164	17	15	11	26	29	28
P01270	PTHY_HUMAN	115	1	20	3	23	21	4
P01308	INS_HUMAN	110	6	7	9	16	13	14
P01571	IFN17_HUMAN	189	5	19	17	36	24	22
P01579	IFNG_HUMAN	166	3	29	19	48	32	21
P01597	KV139_HUMAN	117	3	8	11	19	10	13
P01615	KVD28_HUMAN	120	2	6	10	16	8	11
P01732	CD8A_HUMAN	235	9	18	21	39	25	28
P01764	HV323_HUMAN	117	3	10	14	24	13	16
P01825	HV459_HUMAN	116	2	9	16	25	11	17
P01877	IGHA2_HUMAN	391	15	25	25	50	40	40
P01909	DQA1_HUMAN	254	5	16	21	37	21	25
P02452	CO1A1_HUMAN	1464	18	120	38	158	138	55
P02538	K2C6A_HUMAN	564	5	66	35	101	71	40
P02649	APOE_HUMAN	317	2	47	16	63	49	18
P02679	FIBG_HUMAN	453	11	43	54	97	53	63
P02743	SAMP_HUMAN	223	2	18	27	45	20	29
P02745	C1QA_HUMAN	245	5	24	17	41	29	21
P02747	C1QC_HUMAN	245	4	19	19	38	23	22
P02748	CO9_HUMAN	559	26	68	52	120	88	78
P02771	FETA_HUMAN	609	32	59	51	110	89	83
P02774	VTDB_HUMAN	474	28	56	33	89	83	60
P02776	PLF4_HUMAN	101	5	10	4	14	15	8
P02786	TFR1_HUMAN	760	8	82	79	161	89	84
P03915	NU5M_HUMAN	603	6	29	61	90	35	67
P03951	FA11_HUMAN	625	36	67	57	124	99	91
P03956	MMP1_HUMAN	469	3	53	57	110	55	60
P03999	OPSB_HUMAN	345	15	24	54	78	39	66
P04062	GBA1_HUMAN	536	8	44	56	100	52	63
P04080	CYTB_HUMAN	98	1	10	9	19	11	10
P04090	REL2_HUMAN	185	7	23	13	36	29	19
P04155	TFF1_HUMAN	84	8	5	4	9	13	11
P04179	SODM_HUMAN	222	3	21	22	43	24	25
P04180	LCAT_HUMAN	440	6	28	49	77	34	54
P04198	MYCN_HUMAN	464	7	49	18	67	55	25
P04201	MAS_HUMAN	325	9	27	43	70	34	51
P04275	VWF_HUMAN	2813	234	240	184	424	458	407
P04406	G3P_HUMAN	335	3	35	26	61	38	29
P04626	ERBB2_HUMAN	1255	59	102	83	185	155	139
P04731	MT1A_HUMAN	61	20	8	0	8	24	20
P04844	RPN2_HUMAN	631	2	46	53	99	48	55
P05106	ITB3_HUMAN	788	56	75	54	129	126	106
P05177	CP1A2_HUMAN	516	7	52	49	101	56	55
P05362	ICAM1_HUMAN	532	14	49	22	71	60	36
P05386	RLA1_HUMAN	114	2	7	5	12	9	7
P05451	REG1A_HUMAN	166	7	14	23	37	21	27
P05452	TETN_HUMAN	202	7	21	17	38	26	24
P05813	CRBA1_HUMAN	215	5	20	26	46	25	30
P05814	CASB_HUMAN	226	1	15	9	24	16	10
P05976	MYL1_HUMAN	194	1	22	11	33	23	12
P05997	CO5A2_HUMAN	1499	17	123	33	156	140	49
P06028	GLPB_HUMAN	91	1	6	5	11	7	6
P06126	CD1A_HUMAN	327	8	23	36	59	30	42
P06734	FCER2_HUMAN	321	10	35	23	58	43	32
P06756	ITAV_HUMAN	1048	19	100	93	193	117	110
P06865	HEXA_HUMAN	529	8	44	66	110	51	73
P07197	NFM_HUMAN	916	1	146	30	176	146	31
P07359	GP1BA_HUMAN	652	9	45	41	86	53	49
P07384	CAN1_HUMAN	714	11	88	80	168	98	90
P07438	MT1B_HUMAN	61	21	9	0	9	24	21
P07492	GRP_HUMAN	148	1	22	5	27	23	6
P07510	ACHG_HUMAN	517	15	34	44	78	48	56
P07737	PROF1_HUMAN	140	3	15	11	26	16	14
P07902	GALT_HUMAN	379	5	37	31	68	42	36
P07910	HNRPC_HUMAN	306	1	47	14	61	48	15
P07942	LAMB1_HUMAN	1786	127	162	120	282	272	240
P07998	RNAS1_HUMAN	156	8	19	9	28	26	16
P08172	ACM2_HUMAN	466	13	42	41	83	55	52
P08253	MMP2_HUMAN	660	19	67	83	150	85	95
P08519	APOA_HUMAN	2040	109	129	185	314	234	245
P08572	CO4A2_HUMAN	1712	21	151	70	221	169	90
P08620	FGF4_HUMAN	206	2	24	17	41	26	18
P08621	RU17_HUMAN	437	1	111	22	133	112	22
P08637	FCG3A_HUMAN	254	5	27	31	58	29	34
P08648	ITA5_HUMAN	1049	20	77	93	170	95	111
P08670	VIME_HUMAN	466	1	62	24	86	63	25
P08700	IL3_HUMAN	152	2	13	8	21	15	10
P08865	RSSA_HUMAN	295	2	26	26	52	28	28
P08887	IL6RA_HUMAN	468	12	42	37	79	53	49
P08922	ROS1_HUMAN	2347	49	188	245	433	233	290
P09017	HXC4_HUMAN	264	5	31	17	48	36	22
P09038	FGF2_HUMAN	288	6	51	16	67	56	21
P09086	PO2F2_HUMAN	479	4	34	20	54	37	23
P09466	PAEP_HUMAN	180	6	16	13	29	22	19
P09467	F16P1_HUMAN	338	7	40	24	64	47	31
P09493	TPM1_HUMAN	284	1	53	7	60	53	8
P09496	CLCA_HUMAN	248	2	23	18	41	25	20
P09525	ANXA4_HUMAN	319	4	46	24	70	49	28
P09543	CN37_HUMAN	421	7	63	37	100	70	42
P09544	WNT2_HUMAN	360	24	50	33	83	71	55
P09603	CSF1_HUMAN	554	12	41	27	68	52	38
P09668	CATH_HUMAN	335	12	30	41	71	42	52
P09683	SECR_HUMAN	121	1	11	5	16	12	6
P09758	TACD2_HUMAN	323	12	45	16	61	54	27
P09769	FGR_HUMAN	529	11	52	54	106	63	64
P09848	LPH_HUMAN	1927	19	176	238	414	194	253
P09874	PARP1_HUMAN	1014	14	153	72	225	165	84
P09884	DPOLA_HUMAN	1462	31	187	120	307	215	148
P09912	IFI6_HUMAN	130	3	7	10	17	9	13
P09914	IFIT1_HUMAN	478	8	67	43	110	73	51
P09936	UCHL1_HUMAN	223	6	24	14	38	29	20
P0C024	NUDT7_HUMAN	238	4	26	19	45	30	23
P0C5Z0	H2AB2_HUMAN	115	1	17	5	22	18	6
P0C7P0	CISD3_HUMAN	127	6	22	9	31	28	12
P0C870	JMJD7_HUMAN	316	7	23	35	58	29	41
P0CAP2	GRL1A_HUMAN	368	6	54	16	70	60	22
P0CG20	PRR35_HUMAN	571	12	47	19	66	57	30
P0DMS8	AA3R_HUMAN	318	10	24	42	66	34	52
P0DP58	LYNX1_HUMAN	116	10	7	10	17	15	19
P0DPB6	RPAC2_HUMAN	133	3	17	8	25	20	10
P0DPH7	TBA3C_HUMAN	450	12	39	40	79	50	50
P0DPK4	NT2NC_HUMAN	293	40	21	23	44	55	60
P0DPQ6	DT3UO_HUMAN	34	2	7	3	10	8	5
P0DTE4	UD2A1_HUMAN	527	12	53	57	110	65	69
P10153	RNAS2_HUMAN	161	9	12	11	23	20	20
P10176	COX8A_HUMAN	69	1	7	4	11	8	5
P10276	RARA_HUMAN	462	18	47	25	72	62	42
P10523	ARRS_HUMAN	405	3	49	28	77	52	31
P10619	PPGB_HUMAN	480	9	38	60	98	46	69
P10620	MGST1_HUMAN	155	1	18	19	37	19	20
P10632	CP2C8_HUMAN	490	14	60	45	105	74	59
P10635	CP2D6_HUMAN	497	6	44	45	89	50	50
P10645	CMGA_HUMAN	457	3	54	11	65	56	14
P10646	TFPI1_HUMAN	304	19	42	34	76	60	50
P10721	KIT_HUMAN	976	24	97	93	190	119	115
P10767	FGF6_HUMAN	208	2	24	20	44	26	21
P10909	CLUS_HUMAN	449	10	56	38	94	65	48
P10911	MCF2_HUMAN	925	17	109	82	191	125	96
P11055	MYH3_HUMAN	1940	19	310	108	418	324	123
P11137	MTAP2_HUMAN	1827	8	215	70	285	222	77
P11233	RALA_HUMAN	206	3	35	17	52	37	20
P11308	ERG_HUMAN	479	5	44	41	85	49	46
P11441	UBL4A_HUMAN	157	1	23	7	30	24	8
P11464	PSG1_HUMAN	419	7	38	40	78	45	47
P11686	PSPC_HUMAN	197	6	12	11	23	18	17
P11766	ADHX_HUMAN	374	15	38	24	62	52	38
P11801	KPSH1_HUMAN	424	6	67	30	97	72	36
P12004	PCNA_HUMAN	261	6	24	16	40	28	22
P12035	K2C3_HUMAN	628	3	60	48	108	63	51
P12036	NFH_HUMAN	1020	4	200	20	220	203	24
P12694	ODBA_HUMAN	445	5	50	43	93	55	47
P12814	ACTN1_HUMAN	892	10	102	71	173	110	77
P12830	CADH1_HUMAN	882	8	67	66	133	75	73
P13051	UNG_HUMAN	313	3	34	28	62	37	31
P13164	IFM1_HUMAN	125	3	9	13	22	11	15
P13284	GILT_HUMAN	250	11	16	20	36	26	31
P13378	HXD8_HUMAN	290	5	32	24	56	37	29
P13473	LAMP2_HUMAN	410	10	26	40	66	35	50
P13489	RINI_HUMAN	461	32	38	13	51	69	44
P13591	NCAM1_HUMAN	858	15	77	63	140	89	78
P13646	K1C13_HUMAN	458	6	47	27	74	53	33
P13647	K2C5_HUMAN	590	4	66	42	108	70	46
P13671	CO6_HUMAN	934	64	110	79	189	163	140
P13686	PPA5_HUMAN	325	3	32	35	67	35	38
P13688	CEAM1_HUMAN	526	8	31	38	69	39	45
P13716	HEM2_HUMAN	330	8	33	25	58	39	33
P13765	DOB_HUMAN	273	5	25	26	51	30	31
P13866	SC5A1_HUMAN	664	15	48	73	121	61	84
P13928	ANXA8_HUMAN	327	4	42	25	67	44	29
P13994	YJU2B_HUMAN	396	8	61	22	83	67	29
P14060	3BHS1_HUMAN	373	5	39	38	77	44	43
P14136	GFAP_HUMAN	432	1	67	18	85	68	19
P14174	MIF_HUMAN	115	3	7	10	17	10	13
P14317	HCLS1_HUMAN	486	2	62	34	96	63	36
P14550	AK1A1_HUMAN	325	6	35	26	61	41	32
P14649	MYL6B_HUMAN	208	2	25	13	38	27	15
P14652	HXB2_HUMAN	356	9	28	20	48	37	29
P14678	RSMB_HUMAN	240	3	25	5	30	27	8
P14735	IDE_HUMAN	1019	14	115	104	219	129	116
P14784	IL2RB_HUMAN	551	13	36	48	84	47	60
P14867	GBRA1_HUMAN	456	5	52	49	101	57	54
P14920	OXDA_HUMAN	347	5	32	35	67	37	40
P15090	FABP4_HUMAN	132	2	19	10	29	21	12
P15104	GLNA_HUMAN	373	11	40	37	77	49	47
P15170	ERF3A_HUMAN	499	11	61	31	92	72	41
P15260	INGR1_HUMAN	489	12	38	36	74	50	46
P15313	VATB1_HUMAN	513	7	49	36	85	56	43
P15374	UCHL3_HUMAN	230	3	20	17	37	23	20
P15391	CD19_HUMAN	556	8	43	46	89	51	52
P15428	PGDH_HUMAN	266	4	23	19	42	27	22
P15514	AREG_HUMAN	252	6	33	16	49	37	21
P15529	MCP_HUMAN	392	18	35	42	77	50	58
P15814	IGLL1_HUMAN	213	4	20	11	31	23	15
P15848	ARSB_HUMAN	533	9	50	48	98	56	57
P15880	RS2_HUMAN	293	5	47	21	68	50	26
P15923	TFE2_HUMAN	654	2	52	27	79	54	29
P15941	MUC1_HUMAN	1255	3	19	28	47	22	31
P16112	PGCA_HUMAN	2530	34	95	120	215	125	150
P16234	PGFRA_HUMAN	1089	17	106	87	193	118	103
P16383	GCFC2_HUMAN	781	10	110	44	154	119	53
P16389	KCNA2_HUMAN	499	8	39	57	96	47	64
P16410	CTLA4_HUMAN	223	9	16	23	39	25	31
P16455	MGMT_HUMAN	207	5	18	11	29	23	16
P16473	TSHR_HUMAN	764	24	67	80	147	91	103
P16591	FER_HUMAN	822	11	111	56	167	119	67
P16615	AT2A2_HUMAN	1042	29	97	75	172	123	103
P16870	CBPE_HUMAN	476	7	45	42	87	52	49
P17022	ZNF18_HUMAN	549	17	56	37	93	70	53
P17023	ZNF19_HUMAN	458	22	48	41	89	70	62
P17040	ZSC20_HUMAN	1043	41	117	78	195	146	119
P17050	NAGAB_HUMAN	411	9	30	38	68	38	47
P17252	KPCA_HUMAN	672	20	86	68	154	104	85
P17405	ASM_HUMAN	631	18	46	60	106	63	76
P17509	HXB6_HUMAN	224	6	29	24	53	34	30
P17540	KCRS_HUMAN	419	9	58	30	88	67	38
P17643	TYRP1_HUMAN	537	17	44	52	96	59	69
P17676	CEBPB_HUMAN	345	7	36	22	58	43	29
P17787	ACHB2_HUMAN	502	14	47	53	100	60	67
P17812	PYRG1_HUMAN	591	12	65	48	113	75	58
P17861	XBP1_HUMAN	261	3	29	10	39	32	13
P17947	SPI1_HUMAN	270	2	32	23	55	34	25
P17987	TCPA_HUMAN	556	9	66	20	86	75	29
P18074	ERCC2_HUMAN	760	14	90	68	158	102	79
P18075	BMP7_HUMAN	431	7	44	44	88	51	50
P18084	ITB5_HUMAN	799	58	75	58	133	126	114
P18124	RL7_HUMAN	248	1	61	21	82	62	22
P18440	ARY1_HUMAN	290	5	32	35	67	37	38
P18510	IL1RA_HUMAN	177	6	18	16	34	24	22
P18621	RL17_HUMAN	184	4	39	10	49	42	14
P18669	PGAM1_HUMAN	254	2	33	21	54	35	23
P18848	ATF4_HUMAN	351	5	38	19	57	43	24
P18858	DNLI1_HUMAN	919	11	119	46	165	129	56
P19021	AMD_HUMAN	973	15	94	83	177	108	94
P19099	C11B2_HUMAN	503	7	54	44	98	60	51
P19113	DCHS_HUMAN	662	19	74	55	129	93	74
P19224	UD16_HUMAN	532	11	56	59	115	64	69
P19367	HXK1_HUMAN	917	20	118	62	180	137	82
P19438	TNR1A_HUMAN	455	30	45	31	76	72	61
P19484	TFEB_HUMAN	476	1	46	17	63	47	18
P19532	TFE3_HUMAN	575	1	51	14	65	52	15
P19634	SL9A1_HUMAN	815	9	72	71	143	79	79
P19835	CEL_HUMAN	753	6	56	61	117	61	67
P19875	CXCL2_HUMAN	107	4	16	0	16	19	4
P20036	DPA1_HUMAN	260	4	17	25	42	21	29
P20061	TCO1_HUMAN	433	9	30	40	70	39	49
P20132	SDHL_HUMAN	328	6	30	19	49	36	24
P20292	AL5AP_HUMAN	161	2	11	25	36	13	27
P20338	RAB4A_HUMAN	218	5	26	20	46	31	25
P20618	PSB1_HUMAN	241	4	28	21	49	31	25
P20700	LMNB1_HUMAN	586	5	87	22	109	90	27
P20794	MAK_HUMAN	623	4	75	50	125	79	54
P20815	CP3A5_HUMAN	502	5	59	48	107	64	53
P20823	HNF1A_HUMAN	631	3	41	27	68	44	30
P20851	C4BPB_HUMAN	252	17	22	24	46	39	38
P21127	CD11B_HUMAN	795	3	139	38	177	142	41
P21128	ENDOU_HUMAN	410	22	38	49	87	55	71
P21359	NF1_HUMAN	2839	63	286	206	492	345	265
P21439	MDR3_HUMAN	1286	10	133	121	254	142	131
P21583	SCF_HUMAN	273	5	32	23	55	37	28
P21589	5NTD_HUMAN	574	10	57	47	104	64	57
P21675	TAF1_HUMAN	1893	25	231	125	356	252	148
P21709	EPHA1_HUMAN	976	29	90	71	161	115	100
P21728	DRD1_HUMAN	446	16	36	45	81	52	58
P21757	MSRE_HUMAN	451	8	44	25	69	52	32
P21796	VDAC1_HUMAN	283	2	31	29	60	33	31
P21815	SIAL_HUMAN	317	1	23	28	51	24	29
P21860	ERBB3_HUMAN	1342	60	125	88	213	180	148
P21926	CD9_HUMAN	228	10	21	29	50	30	39
P21980	TGM2_HUMAN	687	20	70	59	129	88	77
P22105	TENX_HUMAN	4244	123	374	273	647	472	395
P22303	ACES_HUMAN	614	8	49	63	112	56	71
P22304	IDS_HUMAN	550	7	40	56	96	46	63
P22307	SCP2_HUMAN	547	12	56	42	98	67	54
P22455	FGFR4_HUMAN	802	16	73	53	126	87	69
P22570	ADRO_HUMAN	491	8	51	33	84	57	39
P22674	CCNO_HUMAN	350	17	34	19	53	49	36
P22732	GTR5_HUMAN	501	8	32	48	80	40	55
P22735	TGM1_HUMAN	817	14	72	67	139	84	79
P22897	MRC1_HUMAN	1456	52	145	184	329	192	229
P23083	HV102_HUMAN	117	2	10	16	26	12	17
P23193	TCEA1_HUMAN	301	8	52	12	64	58	19
P23409	MYF6_HUMAN	242	8	30	11	41	37	19
P23416	GLRA2_HUMAN	452	8	54	51	105	62	57
P23458	JAK1_HUMAN	1154	32	155	101	256	182	131
P23468	PTPRD_HUMAN	1912	18	191	158	349	207	175
P23786	CPT2_HUMAN	658	9	70	62	132	78	69
P23921	RIR1_HUMAN	792	16	89	73	162	104	89
P23942	PRPH2_HUMAN	346	12	36	40	76	46	52
P24278	ZBT25_HUMAN	435	14	40	29	69	52	41
P24666	PPAC_HUMAN	158	8	20	14	34	27	22
P25025	CXCR2_HUMAN	360	9	30	42	72	39	50
P25098	ARBK1_HUMAN	689	14	94	62	156	106	74
P25103	NK1R_HUMAN	407	11	28	54	82	38	63
P25106	ACKR3_HUMAN	362	14	25	49	74	39	61
P25440	BRD2_HUMAN	801	5	108	34	142	113	39
P25445	TNR6_HUMAN	335	21	46	13	59	61	32
P25788	PSA3_HUMAN	255	4	30	24	54	33	28
P25874	UCP1_HUMAN	307	8	29	22	51	37	29
P25929	NPY1R_HUMAN	384	12	31	48	79	43	59
P25940	CO5A3_HUMAN	1745	12	159	53	212	171	63
P26022	PTX3_HUMAN	381	10	30	26	56	40	35
P26038	MOES_HUMAN	577	2	101	36	137	103	37
P26368	U2AF2_HUMAN	475	6	65	34	99	71	38
P26439	3BHS2_HUMAN	372	5	38	38	76	43	43
P26447	S10A4_HUMAN	101	4	16	10	26	20	13
P26639	SYTC_HUMAN	723	16	94	74	168	108	89
P26885	FKBP2_HUMAN	142	3	21	9	30	24	12
P27037	AVR2A_HUMAN	513	19	49	44	93	67	62
P27144	KAD4_HUMAN	223	2	26	15	41	28	17
P27338	AOFB_HUMAN	520	9	60	45	105	67	52
P27352	IF_HUMAN	417	6	28	30	58	34	36
P27482	CALL3_HUMAN	149	1	18	9	27	19	10
P27539	GDF1_HUMAN	372	12	36	16	52	48	27
P27694	RFA1_HUMAN	616	11	66	49	115	75	60
P27695	APEX1_HUMAN	318	7	44	27	71	50	34
P28039	AOAH_HUMAN	575	16	57	49	106	73	63
P28069	PIT1_HUMAN	291	8	37	19	56	45	26
P28330	ACADL_HUMAN	430	7	51	35	86	56	42
P28335	5HT2C_HUMAN	458	11	45	38	83	54	47
P28340	DPOD1_HUMAN	1107	26	127	77	204	151	101
P28347	TEAD1_HUMAN	426	7	47	35	82	54	42
P28360	MSX1_HUMAN	303	1	29	17	46	30	18
P28370	SMCA1_HUMAN	1042	12	167	87	254	176	97
P28562	DUS1_HUMAN	367	12	31	28	59	43	40
P28698	MZF1_HUMAN	734	30	83	40	123	109	70
P29017	CD1C_HUMAN	333	7	17	39	56	24	46
P29034	S10A2_HUMAN	98	4	9	9	18	13	13
P29084	T2EB_HUMAN	291	1	52	18	70	53	19
P29275	AA2BR_HUMAN	332	14	21	36	57	34	49
P29353	SHC1_HUMAN	583	9	52	29	81	61	38
P29371	NK3R_HUMAN	465	10	40	59	99	50	65
P29375	KDM5A_HUMAN	1690	50	231	114	345	278	157
P29400	CO4A5_HUMAN	1685	20	109	38	147	126	57
P29475	NOS1_HUMAN	1434	24	164	116	280	185	137
P29508	SPB3_HUMAN	390	1	47	42	89	48	43
P29536	LMOD1_HUMAN	600	3	120	13	133	123	15
P29622	KAIN_HUMAN	427	3	41	47	88	44	50
P29728	OAS2_HUMAN	719	17	86	75	161	101	90
P29966	MARCS_HUMAN	332	3	27	6	33	30	9
P30043	BLVRB_HUMAN	206	2	19	9	28	20	11
P30260	CDC27_HUMAN	824	19	84	67	151	102	84
P30281	CCND3_HUMAN	292	12	31	15	46	42	27
P30307	MPIP3_HUMAN	473	15	58	29	87	69	43
P30542	AA1R_HUMAN	326	9	25	38	63	32	45
P30838	AL3A1_HUMAN	453	7	44	32	76	51	39
P30968	GNRHR_HUMAN	328	8	27	47	74	35	55
P31040	SDHA_HUMAN	664	18	68	50	118	85	68
P31269	HXA9_HUMAN	272	4	30	24	54	33	28
P31271	HXA13_HUMAN	388	6	35	29	64	41	34
P31276	HXC13_HUMAN	330	7	34	24	58	41	30
P31391	SSR4_HUMAN	388	14	30	34	64	43	47
P31645	SC6A4_HUMAN	630	18	39	89	128	57	105
P31785	IL2RG_HUMAN	369	10	26	41	67	35	51
P31941	ABC3A_HUMAN	199	6	19	25	44	25	31
P31948	STIP1_HUMAN	543	11	87	40	127	95	51
P31949	S10AB_HUMAN	105	2	13	10	23	14	12
P32239	GASR_HUMAN	447	15	38	30	68	51	44
P32241	VIPR1_HUMAN	457	16	37	57	94	53	71
P32246	CCR1_HUMAN	355	7	31	51	82	38	58
P32298	GRK4_HUMAN	578	21	88	57	145	109	75
P32320	CDD_HUMAN	146	9	12	10	22	21	18
P32321	DCTD_HUMAN	178	8	21	14	35	28	22
P32322	P5CR1_HUMAN	319	4	29	11	40	32	14
P32754	HPPD_HUMAN	393	3	46	41	87	48	43
P32881	IFNA8_HUMAN	189	4	21	19	40	25	23
P32942	ICAM3_HUMAN	547	17	42	32	74	57	47
P32970	CD70_HUMAN	193	8	15	11	26	23	19
P33763	S10A5_HUMAN	92	2	14	8	22	16	10
P33981	TTK_HUMAN	857	17	108	57	165	124	74
P33991	MCM4_HUMAN	863	10	103	46	149	112	56
P34897	GLYM_HUMAN	504	8	60	38	98	67	45
P34910	EVI2B_HUMAN	448	6	27	23	50	32	28
P34949	MPI_HUMAN	423	10	32	29	61	42	39
P34982	OR1D2_HUMAN	312	11	22	38	60	33	47
P34995	PE2R1_HUMAN	402	11	36	25	61	46	35
P35221	CTNA1_HUMAN	906	12	119	37	156	130	48
P35232	PHB1_HUMAN	272	1	28	18	46	29	19
P35237	SPB6_HUMAN	376	6	41	39	80	46	43
P35241	RADI_HUMAN	583	2	99	38	137	101	39
P35243	RECO_HUMAN	200	2	27	21	48	29	23
P35270	SPRE_HUMAN	261	5	29	12	41	34	16
P35321	SPR1A_HUMAN	89	8	11	0	11	19	8
P35326	SPR2A_HUMAN	72	11	8	1	9	16	12
P35414	APJ_HUMAN	380	14	29	50	79	42	61
P35452	HXD12_HUMAN	270	4	31	22	53	35	26
P35462	DRD3_HUMAN	400	16	33	38	71	49	53
P35555	FBN1_HUMAN	2871	361	225	185	410	537	535
P35556	FBN2_HUMAN	2912	363	209	194	403	527	548
P35573	GDE_HUMAN	1532	38	160	152	312	193	184
P35637	FUS_HUMAN	526	4	49	49	98	52	53
P35670	ATP7B_HUMAN	1465	29	120	68	188	147	95
P35712	SOX6_HUMAN	828	7	91	32	123	98	38
P35858	ALS_HUMAN	605	13	52	38	90	65	50
P35914	HMGCL_HUMAN	325	8	32	16	48	40	24
P36021	MOT8_HUMAN	539	10	38	59	97	48	67
P36222	CH3L1_HUMAN	383	7	40	43	83	47	49
P36382	CXA5_HUMAN	358	11	35	34	69	44	45
P36406	TRI23_HUMAN	574	26	59	31	90	83	56
P36776	LONM_HUMAN	959	9	120	58	178	128	66
P36871	PGM1_HUMAN	562	5	60	50	110	65	55
P36897	TGFR1_HUMAN	503	19	51	35	86	69	52
P36941	TNR3_HUMAN	435	25	27	23	50	47	47
P36959	GMPR1_HUMAN	345	8	36	24	60	44	32
P37023	ACVL1_HUMAN	503	18	49	32	81	67	48
P37059	DHB2_HUMAN	387	12	37	42	79	49	53
P37198	NUP62_HUMAN	522	3	29	33	62	32	36
P37235	HPCL1_HUMAN	193	2	25	21	46	27	23
P37802	TAGL2_HUMAN	199	3	22	14	36	25	17
P38571	LICH_HUMAN	399	7	32	51	83	39	57
P38935	SMBP2_HUMAN	993	16	133	44	177	147	58
P39023	RL3_HUMAN	403	5	84	32	116	89	35
P40121	CAPG_HUMAN	348	5	35	27	62	40	31
P40145	ADCY8_HUMAN	1251	23	120	106	226	140	127
P40222	TXLNA_HUMAN	546	6	88	14	102	94	19
P40259	CD79B_HUMAN	229	5	25	18	43	29	22
P40425	PBX2_HUMAN	430	5	45	22	67	49	27
P40429	RL13A_HUMAN	203	1	49	16	65	49	17
P40616	ARL1_HUMAN	181	2	20	18	38	21	20
P40925	MDHC_HUMAN	334	4	41	21	62	45	25
P41091	IF2G_HUMAN	472	10	53	20	73	63	30
P41145	OPRK_HUMAN	380	12	31	40	71	42	50
P41146	OPRX_HUMAN	370	14	29	34	63	43	46
P41159	LEP_HUMAN	167	3	11	12	23	14	15
P41181	AQP2_HUMAN	271	4	17	21	38	21	25
P41225	SOX3_HUMAN	446	1	35	20	55	36	21
P41240	CSK_HUMAN	450	10	54	39	93	63	48
P41252	SYIC_HUMAN	1262	23	143	120	263	163	142
P41440	S19A1_HUMAN	591	11	44	64	108	54	75
P41968	MC3R_HUMAN	323	18	13	36	49	31	51
P42126	ECI1_HUMAN	302	5	33	18	51	38	22
P42224	STAT1_HUMAN	750	10	87	63	150	96	72
P42331	RHG25_HUMAN	645	9	88	44	132	95	53
P42566	EPS15_HUMAN	896	11	82	56	138	92	63
P42658	DPP6_HUMAN	865	11	90	82	172	99	92
P42680	TEC_HUMAN	631	15	89	73	162	102	86
P42685	FRK_HUMAN	505	8	55	58	113	63	66
P43005	EAA3_HUMAN	524	6	42	39	81	47	43
P43007	SATT_HUMAN	532	7	36	31	67	41	38
P43268	ETV4_HUMAN	484	7	38	48	86	45	55
P43358	MAGA4_HUMAN	317	4	28	20	48	31	24
P43487	RANG_HUMAN	201	3	33	12	45	36	15
P43489	TNR4_HUMAN	277	20	20	8	28	37	27
P43629	KI3L1_HUMAN	444	10	37	35	72	44	44
P43681	ACHA4_HUMAN	627	18	56	50	106	72	66
P45452	MMP13_HUMAN	471	4	47	55	102	49	58
P45973	CBX5_HUMAN	191	3	37	14	51	39	17
P46020	KPB1_HUMAN	1223	18	120	94	214	135	112
P46059	S15A1_HUMAN	708	11	54	79	133	63	89
P46060	RAGP1_HUMAN	587	8	58	25	83	65	32
P46089	GPR3_HUMAN	330	13	15	31	46	28	42
P46094	XCR1_HUMAN	333	13	24	54	78	36	64
P46098	5HT3A_HUMAN	478	8	40	54	94	47	62
P46100	ATRX_HUMAN	2492	43	407	119	526	446	156
P46109	CRKL_HUMAN	303	2	31	24	55	33	26
P46597	ASMT_HUMAN	345	9	30	34	64	37	43
P46695	IEX1_HUMAN	156	3	14	8	22	17	10
P46934	NEDD4_HUMAN	1319	22	136	109	245	158	131
P47211	GALR1_HUMAN	349	10	31	40	71	40	47
P47710	CASA1_HUMAN	185	4	17	11	28	20	14
P47712	PA24A_HUMAN	749	9	75	74	149	83	83
P47736	RPGP1_HUMAN	663	9	69	51	120	76	59
P47756	CAPZB_HUMAN	272	6	37	18	55	43	24
P47870	GBRB2_HUMAN	512	4	62	60	122	66	64
P47871	GLR_HUMAN	477	14	44	56	100	56	68
P47900	P2RY1_HUMAN	373	10	35	52	87	44	61
P47914	RL29_HUMAN	159	1	43	5	48	44	6
P48039	MTR1A_HUMAN	350	10	26	43	69	36	51
P48066	S6A11_HUMAN	632	27	44	83	127	71	108
P48304	REG1B_HUMAN	166	7	15	22	37	22	26
P48506	GSH1_HUMAN	637	14	72	55	127	83	69
P48509	CD151_HUMAN	253	15	22	27	49	37	42
P48547	KCNC1_HUMAN	511	10	49	61	110	59	68
P48728	GCST_HUMAN	403	10	42	20	62	51	30
P48730	KC1D_HUMAN	415	5	62	36	98	67	38
P48735	IDHP_HUMAN	452	8	57	41	98	64	49
P48742	LHX1_HUMAN	406	16	44	31	75	55	46
P48775	T23O_HUMAN	406	3	53	48	101	56	50
P48960	AGRE5_HUMAN	835	49	66	75	141	111	118
P49019	HCAR3_HUMAN	387	15	38	49	87	52	62
P49137	MAPK2_HUMAN	400	7	49	27	76	55	34
P49189	AL9A1_HUMAN	494	16	47	41	88	62	57
P49238	CX3C1_HUMAN	355	10	26	50	76	35	59
P49247	RPIA_HUMAN	311	5	32	19	51	37	23
P49279	NRAM1_HUMAN	550	10	33	59	92	43	69
P49326	FMO5_HUMAN	533	8	63	48	111	70	56
P49356	FNTB_HUMAN	437	16	29	44	73	43	56
P49450	CENPA_HUMAN	140	1	27	8	35	28	9
P49458	SRP09_HUMAN	86	2	14	7	21	16	9
P49593	PPM1F_HUMAN	454	3	43	26	69	46	29
P49619	DGKG_HUMAN	791	28	89	63	152	111	86
P49639	HXA1_HUMAN	335	7	29	24	53	36	31
P49641	MA2A2_HUMAN	1150	12	108	113	221	120	123
P49643	PRI2_HUMAN	509	8	69	50	119	77	56
P49703	ARL4D_HUMAN	201	1	30	12	42	31	13
P49715	CEBPA_HUMAN	358	4	34	15	49	38	19
P49748	ACADV_HUMAN	655	7	71	44	115	78	49
P49761	CLK3_HUMAN	490	13	86	50	136	98	63
P49767	VEGFC_HUMAN	419	38	44	31	75	75	69
P49771	FLT3L_HUMAN	235	7	17	15	32	22	21
P49790	NU153_HUMAN	1475	28	119	101	220	140	129
P49821	NDUV1_HUMAN	464	12	53	35	88	65	47
P49842	WHR1_HUMAN	254	3	34	19	53	37	22
P49863	GRAK_HUMAN	264	9	29	21	50	37	30
P49895	IOD1_HUMAN	249	4	26	28	54	29	32
P49901	MCSP_HUMAN	116	20	10	0	10	28	20
P49908	SEPP1_HUMAN	381	17	42	18	60	56	33
P50151	GBG10_HUMAN	68	3	7	2	9	10	4
P50213	IDH3A_HUMAN	366	8	38	23	61	44	31
P50226	ST1A2_HUMAN	295	2	34	35	69	35	37
P50406	5HT6R_HUMAN	440	14	29	32	61	42	44
P50416	CPT1A_HUMAN	773	12	88	84	172	97	94
P50458	LHX2_HUMAN	406	15	47	25	72	58	38
P50461	CSRP3_HUMAN	194	16	25	18	43	37	32
P50479	PDLI4_HUMAN	330	9	32	14	46	40	22
P50552	VASP_HUMAN	380	3	42	15	57	45	18
P50553	ASCL1_HUMAN	236	2	22	15	37	23	17
P50748	KNTC1_HUMAN	2209	46	226	173	399	268	212
P50895	BCAM_HUMAN	628	14	55	33	88	69	46
P50897	PPT1_HUMAN	306	8	27	29	56	33	37
P50993	AT1A2_HUMAN	1020	23	106	71	177	126	90
P51114	FXR1_HUMAN	621	6	90	36	126	95	42
P51168	SCNNB_HUMAN	640	22	53	65	118	75	85
P51512	MMP16_HUMAN	607	8	64	73	137	71	80
P51530	DNA2_HUMAN	1060	30	126	71	197	155	96
P51531	SMCA2_HUMAN	1590	11	220	86	306	229	96
P51532	SMCA4_HUMAN	1647	10	224	83	307	233	92
P51617	IRAK1_HUMAN	712	17	56	43	99	73	56
P51648	AL3A2_HUMAN	485	8	54	41	95	62	49
P51795	CLCN5_HUMAN	816	17	69	84	153	85	99
P51797	CLCN6_HUMAN	869	25	77	85	162	98	107
P51813	BMX_HUMAN	675	13	88	69	157	100	81
P51817	PRKX_HUMAN	358	3	43	38	81	46	41
P51857	AK1D1_HUMAN	326	6	37	29	66	43	33
P51884	LUM_HUMAN	338	6	34	30	64	40	34
P51946	CCNH_HUMAN	323	8	42	30	72	48	37
P51956	NEK3_HUMAN	506	9	65	37	102	73	45
P51959	CCNG1_HUMAN	295	11	39	23	62	46	34
P51970	NDUA8_HUMAN	172	8	23	17	40	29	25
P52597	HNRPF_HUMAN	415	6	37	44	81	43	49
P52732	KIF11_HUMAN	1056	18	131	47	178	146	63
P52739	ZN131_HUMAN	623	18	68	37	105	83	54
P52789	HXK2_HUMAN	917	25	113	60	173	137	85
P52798	EFNA4_HUMAN	201	7	18	21	39	25	28
P52799	EFNB2_HUMAN	333	8	36	27	63	43	33
P52849	NDST2_HUMAN	883	10	86	94	180	94	102
P52952	NKX25_HUMAN	324	7	36	21	57	41	28
P52961	NAR1_HUMAN	327	6	26	32	58	30	38
P53365	ARFP2_HUMAN	341	2	38	23	61	39	25
P53618	COPB_HUMAN	953	20	105	54	159	123	72
P53674	CRBB1_HUMAN	252	1	27	28	55	28	29
P53701	CCHL_HUMAN	268	7	32	27	59	38	34
P53804	TTC3_HUMAN	2025	55	266	147	413	311	195
P54098	DPOG1_HUMAN	1239	20	137	101	238	154	118
P54105	ICLN_HUMAN	237	3	13	17	30	16	20
P54198	HIRA_HUMAN	1017	26	106	60	166	130	84
P54289	CA2D1_HUMAN	1103	20	107	111	218	127	130
P54296	MYOM2_HUMAN	1465	27	168	132	300	191	156
P54315	LIPR1_HUMAN	467	13	42	47	89	54	59
P54707	AT12A_HUMAN	1039	15	106	82	188	119	96
P54710	ATNG_HUMAN	66	1	9	7	16	9	8
P54802	ANAG_HUMAN	743	8	58	85	143	66	91
P54821	PRRX1_HUMAN	245	1	31	14	45	32	15
P54840	GYS2_HUMAN	703	11	81	77	158	92	86
P54845	NRL_HUMAN	237	3	29	12	41	31	15
P54855	UDB15_HUMAN	530	9	55	64	119	64	71
P54920	SNAA_HUMAN	295	8	34	28	62	41	34
P55000	SLUR1_HUMAN	103	11	7	6	13	16	16
P55036	PSMD4_HUMAN	377	4	39	13	52	43	16
P55072	TERA_HUMAN	806	12	98	45	143	110	56
P55157	MTP_HUMAN	894	11	106	65	171	117	76
P55196	AFAD_HUMAN	1824	18	238	106	344	254	122
P55259	GP2_HUMAN	537	29	39	41	80	65	67
P55263	ADK_HUMAN	362	7	42	31	73	49	38
P55287	CAD11_HUMAN	796	8	68	62	130	76	69
P55327	TPD52_HUMAN	224	1	25	13	38	26	14
P55809	SCOT1_HUMAN	520	8	59	34	93	66	42
P55854	SUMO3_HUMAN	103	1	12	6	18	13	6
P56270	MAZ_HUMAN	477	17	40	17	57	55	34
P56381	ATP5E_HUMAN	51	1	11	5	16	12	6
P56470	LEG4_HUMAN	323	2	27	39	66	28	41
P56559	ARL4C_HUMAN	192	3	26	13	39	28	16
P56589	PEX3_HUMAN	373	7	37	24	61	43	31
P56645	PER3_HUMAN	1201	26	111	74	185	134	96
P56851	EP3B_HUMAN	147	6	18	19	37	22	25
P56880	CLD20_HUMAN	219	8	13	16	29	20	23
P56962	STX17_HUMAN	302	4	40	12	52	42	16
P56975	NRG3_HUMAN	720	18	68	43	111	83	57
P57075	UBS3A_HUMAN	661	21	68	56	124	86	75
P57088	TMM33_HUMAN	247	6	21	27	48	27	31
P57678	GEMI4_HUMAN	1058	31	99	88	187	127	117
P57730	CAR18_HUMAN	90	4	14	2	16	18	6
P57735	RAB25_HUMAN	213	2	23	18	41	25	20
P57737	CORO7_HUMAN	925	19	84	55	139	101	72
P57771	RGS8_HUMAN	180	4	30	16	46	34	20
P58397	ATS12_HUMAN	1594	87	167	114	281	246	190
P58418	CLRN1_HUMAN	232	7	16	33	49	23	38
P59044	NLRP6_HUMAN	892	26	113	51	164	138	74
P59666	DEF3_HUMAN	94	6	9	6	15	15	10
P59827	BPIB4_HUMAN	614	6	45	27	72	50	32
P59998	ARPC4_HUMAN	168	2	22	14	36	24	16
P60022	DEFB1_HUMAN	68	7	7	7	14	13	14
P60033	CD81_HUMAN	236	12	13	27	40	24	39
P60174	TPIS_HUMAN	249	5	27	17	44	32	22
P60368	KR102_HUMAN	255	69	4	2	6	73	71
P60370	KR105_HUMAN	271	74	2	3	5	76	77
P60412	KR10B_HUMAN	298	77	9	5	14	85	81
P60763	RAC3_HUMAN	192	7	21	13	34	26	20
P61020	RAB5B_HUMAN	215	4	23	17	40	27	21
P61088	UBE2N_HUMAN	152	1	18	11	29	19	12
P61106	RAB14_HUMAN	215	4	22	20	42	26	24
P61158	ARP3_HUMAN	418	8	44	43	87	52	51
P61160	ARP2_HUMAN	394	5	49	31	80	53	36
P61163	ACTZ_HUMAN	376	2	46	37	83	48	38
P61204	ARF3_HUMAN	181	1	22	15	37	23	16
P61247	RS3A_HUMAN	264	4	51	16	67	55	19
P61266	STX1B_HUMAN	288	4	46	11	57	49	15
P61587	RND3_HUMAN	244	9	31	14	45	39	22
P61927	RL37_HUMAN	97	4	28	7	35	30	11
P61952	GBG11_HUMAN	73	2	14	2	16	15	4
P61956	SUMO2_HUMAN	95	1	12	6	18	13	6
P61968	LMO4_HUMAN	165	15	15	13	28	26	27
P61970	NTF2_HUMAN	127	3	7	14	21	10	17
P62258	1433E_HUMAN	255	3	32	19	51	35	22
P62266	RS23_HUMAN	143	3	31	8	39	32	11
P62280	RS11_HUMAN	158	3	34	15	49	36	18
P62304	RUXE_HUMAN	92	1	13	7	20	14	8
P62745	RHOB_HUMAN	196	8	25	13	38	33	20
P62826	RAN_HUMAN	216	3	26	22	48	29	25
P62952	BLCAP_HUMAN	87	7	1	14	15	8	20
P63096	GNAI1_HUMAN	354	10	48	34	82	58	43
P63098	CANB1_HUMAN	170	2	21	14	35	23	15
P63104	1433Z_HUMAN	245	3	31	19	50	34	22
P63128	POK9_HUMAN	1117	20	119	72	191	137	91
P63172	DYLT1_HUMAN	113	4	7	11	18	11	14
P67870	CSK2B_HUMAN	215	6	17	25	42	22	26
P67936	TPM4_HUMAN	248	2	43	4	47	44	6
P68036	UB2L3_HUMAN	154	3	23	12	35	25	14
P68363	TBA1B_HUMAN	451	12	39	40	79	50	50
P68543	UBX2A_HUMAN	259	4	32	18	50	35	22
P78332	RBM6_HUMAN	1123	11	178	89	267	188	98
P78357	CNTP1_HUMAN	1384	36	117	165	282	147	195
P78364	PHC1_HUMAN	1004	11	64	24	88	73	33
P78383	S35B1_HUMAN	322	7	25	39	64	32	46
P78406	RAE1L_HUMAN	368	11	35	37	72	42	47
P78412	IRX6_HUMAN	446	14	48	28	76	62	42
P78413	IRX4_HUMAN	519	9	47	29	76	55	36
P78504	JAG1_HUMAN	1218	131	107	86	193	225	206
P78508	KCJ10_HUMAN	379	5	37	36	73	42	41
P78543	BTG2_HUMAN	158	5	15	10	25	19	15
P78562	PHEX_HUMAN	749	10	98	83	181	105	92
P80098	CCL7_HUMAN	99	5	17	7	24	22	12
P80188	NGAL_HUMAN	198	3	23	22	45	25	25
P80303	NUCB2_HUMAN	420	2	66	29	95	68	30
P80404	GABT_HUMAN	500	12	57	43	100	68	53
P81534	D103A_HUMAN	67	6	14	6	20	17	11
P82094	TMF1_HUMAN	1093	9	139	35	174	148	44
P82673	RT35_HUMAN	323	5	47	18	65	50	21
P82932	RT06_HUMAN	125	1	19	7	26	20	8
P83876	TXN4A_HUMAN	142	2	17	18	35	19	20
P83916	CBX1_HUMAN	185	2	33	12	45	34	14
P84103	SRSF3_HUMAN	164	4	43	12	55	47	16
P84243	H33_HUMAN	136	1	29	7	36	30	8
P84996	ALEX_HUMAN	626	9	73	17	90	81	26
P85298	RHG08_HUMAN	464	5	53	48	101	58	53
P98066	TSG6_HUMAN	277	8	29	37	66	37	43
P98082	DAB2_HUMAN	770	2	68	50	118	70	52
P98155	VLDLR_HUMAN	873	67	79	57	136	136	123
P98194	AT2C1_HUMAN	919	20	88	57	145	105	75
P98198	AT8B2_HUMAN	1209	22	121	136	257	141	154
P99999	CYC_HUMAN	105	2	20	9	29	21	11
Q00325	S25A3_HUMAN	362	8	39	43	82	46	50
Q00341	VIGLN_HUMAN	1268	11	181	46	227	189	57
Q00537	CDK17_HUMAN	523	5	67	36	103	72	40
Q00587	BORG5_HUMAN	391	2	33	16	49	35	17
Q00G26	PLIN5_HUMAN	463	12	45	17	62	56	29
Q00LT1	PRCD_HUMAN	54	1	8	3	11	9	4
Q01064	PDE1B_HUMAN	536	9	56	43	99	65	51
Q01081	U2AF1_HUMAN	240	9	44	22	66	51	30
Q01118	SCN7A_HUMAN	1682	40	169	209	378	205	246
Q01151	CD83_HUMAN	205	7	23	16	39	29	23
Q01201	RELB_HUMAN	579	13	57	31	88	70	44
Q01362	FCERB_HUMAN	244	6	17	20	37	22	26
Q01518	CAP1_HUMAN	475	8	53	28	81	60	36
Q01534	TSPY1_HUMAN	308	4	33	24	57	37	27
Q01581	HMCS1_HUMAN	520	10	47	45	92	56	52
Q01668	CAC1D_HUMAN	2161	45	217	212	429	258	255
Q01718	ACTHR_HUMAN	297	10	22	37	59	32	42
Q01740	FMO1_HUMAN	532	11	50	59	109	59	69
Q01813	PFKAP_HUMAN	784	16	88	55	143	103	68
Q01814	AT2B2_HUMAN	1243	21	132	78	210	150	97
Q01892	SPIB_HUMAN	262	4	27	23	50	31	27
Q01968	OCRL_HUMAN	901	22	107	82	189	125	100
Q01974	ROR2_HUMAN	943	29	80	69	149	108	92
Q02040	AK17A_HUMAN	695	11	145	29	174	154	40
Q02083	NAAA_HUMAN	359	3	37	34	71	40	36
Q02094	RHAG_HUMAN	409	5	21	44	65	26	49
Q02108	GCYA1_HUMAN	690	23	77	53	130	100	72
Q02413	DSG1_HUMAN	1049	18	75	67	142	93	83
Q02446	SP4_HUMAN	784	11	42	15	57	53	25
Q02548	PAX5_HUMAN	391	3	35	23	58	38	26
Q02575	HEN1_HUMAN	133	2	21	6	27	23	8
Q02742	GCNT1_HUMAN	428	9	54	44	98	63	52
Q02747	GUC2A_HUMAN	115	7	8	6	14	15	13
Q02928	CP4AB_HUMAN	519	8	55	41	96	61	49
Q03112	MECOM_HUMAN	1230	31	136	82	218	161	109
Q03403	TFF2_HUMAN	129	15	10	10	20	24	23
Q03405	UPAR_HUMAN	335	29	29	17	46	55	46
Q04725	TLE2_HUMAN	743	21	59	43	102	79	64
Q04741	EMX1_HUMAN	290	2	36	19	55	38	21
Q04756	HGFA_HUMAN	655	39	53	53	106	87	85
Q05329	DCE2_HUMAN	585	15	58	56	114	71	70
Q05586	NMDZ1_HUMAN	938	12	110	81	191	121	92
Q05682	CALD1_HUMAN	793	1	182	22	204	182	23
Q05823	RN5A_HUMAN	741	14	97	51	148	111	64
Q05D32	CTSL2_HUMAN	466	3	55	33	88	58	36
Q06203	PUR1_HUMAN	517	14	55	36	91	66	49
Q06495	NPT2A_HUMAN	639	13	44	43	87	56	55
Q06945	SOX4_HUMAN	474	4	41	23	64	45	25
Q07065	CKAP4_HUMAN	602	2	75	19	94	77	20
Q07108	CD69_HUMAN	199	9	17	24	41	24	33
Q07283	TRHY_HUMAN	1943	8	537	77	614	543	84
Q07326	PIGF_HUMAN	219	9	13	31	44	21	40
Q08209	PP2BA_HUMAN	521	12	56	45	101	68	57
Q08345	DDR1_HUMAN	913	17	84	74	158	99	90
Q08554	DSC1_HUMAN	894	26	91	65	156	115	88
Q08623	HDHD1_HUMAN	228	3	21	17	38	23	20
Q08708	CLM6_HUMAN	224	4	22	14	36	25	16
Q08945	SSRP1_HUMAN	709	6	116	61	177	122	67
Q08AM6	VAC14_HUMAN	782	18	81	55	136	99	71
Q09028	RBBP4_HUMAN	425	5	31	35	66	36	40
Q09161	NCBP1_HUMAN	790	19	88	74	162	105	92
Q0D2K3	RIPP1_HUMAN	151	3	10	8	18	13	11
Q0IIM8	TBC8B_HUMAN	1120	26	126	115	241	149	139
Q0PNE2	ELP6_HUMAN	266	6	23	24	47	29	28
Q0VAK6	LMOD3_HUMAN	560	3	80	23	103	82	26
Q0VD86	INCA1_HUMAN	236	5	25	13	38	29	18
Q0VDF9	HSP7E_HUMAN	509	12	54	25	79	63	37
Q0VG99	MESP2_HUMAN	397	13	30	22	52	42	34
Q0WX57	U17LO_HUMAN	530	17	56	35	91	71	52
Q10570	CPSF1_HUMAN	1443	22	145	116	261	165	136
Q10571	MN1_HUMAN	1320	12	75	60	135	86	72
Q12769	NU160_HUMAN	1436	41	117	121	238	155	157
Q12794	HYAL1_HUMAN	435	11	29	47	76	37	56
Q12797	ASPH_HUMAN	758	8	91	52	143	98	60
Q12830	BPTF_HUMAN	3046	48	370	123	493	411	165
Q12836	ZP4_HUMAN	540	24	43	38	81	65	61
Q12860	CNTN1_HUMAN	1018	15	96	93	189	111	107
Q12888	TP53B_HUMAN	1972	36	174	71	245	208	106
Q12899	TRI26_HUMAN	539	14	69	40	109	82	52
Q12947	FOXF2_HUMAN	444	11	27	34	61	37	45
Q12962	TAF10_HUMAN	218	2	16	11	27	18	13
Q12965	MYO1E_HUMAN	1108	10	140	105	245	147	113
Q12967	GNDS_HUMAN	914	18	92	59	151	108	76
Q12982	BNIP2_HUMAN	314	3	36	26	62	38	29
Q12996	CSTF3_HUMAN	717	8	104	70	174	109	77
Q13042	CDC16_HUMAN	620	14	67	68	135	79	81
Q13043	STK4_HUMAN	487	4	57	33	90	61	36
Q13075	BIRC1_HUMAN	1403	42	141	127	268	179	167
Q13111	CAF1A_HUMAN	956	21	146	42	188	167	62
Q13117	DAZ2_HUMAN	558	5	23	73	96	28	78
Q13133	NR1H3_HUMAN	447	12	52	27	79	62	39
Q13158	FADD_HUMAN	208	4	27	8	35	31	12
Q13162	PRDX4_HUMAN	271	4	27	26	53	31	30
Q13177	PAK2_HUMAN	524	5	60	30	90	64	34
Q13216	ERCC8_HUMAN	396	13	39	34	73	52	47
Q13253	NOGG_HUMAN	232	10	27	16	43	33	25
Q13255	GRM1_HUMAN	1194	33	110	99	209	141	131
Q13257	MD2L1_HUMAN	205	3	23	18	41	25	21
Q13263	TIF1B_HUMAN	835	31	79	36	115	109	62
Q13275	SEM3F_HUMAN	785	21	89	68	157	108	87
Q13309	SKP2_HUMAN	424	14	41	27	68	51	40
Q13319	CD5R2_HUMAN	367	8	43	21	64	48	29
Q13325	IFIT5_HUMAN	482	8	69	50	119	77	58
Q13368	MPP3_HUMAN	585	7	71	37	108	78	44
Q13410	BT1A1_HUMAN	526	10	56	42	98	65	51
Q13416	ORC2_HUMAN	577	1	73	42	115	74	43
Q13427	PPIG_HUMAN	754	9	207	33	240	214	42
Q13428	TCOF_HUMAN	1488	4	200	10	210	203	14
Q13435	SF3B2_HUMAN	895	2	121	42	163	123	43
Q13439	GOGA4_HUMAN	2230	16	371	69	440	383	85
Q13449	LSAMP_HUMAN	338	9	36	19	55	42	28
Q13459	MYO9B_HUMAN	2157	28	300	141	441	324	167
Q13470	TNK1_HUMAN	666	11	67	36	103	76	46
Q13485	SMAD4_HUMAN	552	14	44	33	77	55	44
Q13489	BIRC3_HUMAN	604	22	62	47	109	78	67
Q13491	GPM6B_HUMAN	265	16	13	35	48	27	50
Q13509	TBB3_HUMAN	450	8	37	40	77	45	47
Q13564	ULA1_HUMAN	534	8	56	44	100	62	50
Q13573	SNW1_HUMAN	536	1	102	30	132	103	31
Q13586	STIM1_HUMAN	685	5	84	34	118	89	38
Q13601	KRR1_HUMAN	381	4	77	20	97	81	24
Q13616	CUL1_HUMAN	776	12	104	69	173	113	79
Q13630	FCL_HUMAN	321	4	32	33	65	36	37
Q13698	CAC1S_HUMAN	1873	41	174	196	370	208	233
Q13705	AVR2B_HUMAN	512	19	47	44	91	64	60
Q13724	MOGS_HUMAN	837	3	76	77	153	78	80
Q13751	LAMB3_HUMAN	1172	68	124	61	185	178	126
Q13769	THOC5_HUMAN	683	13	89	47	136	100	60
Q13794	APR_HUMAN	54	2	11	3	14	13	4
Q13822	ENPP2_HUMAN	863	33	91	91	182	118	124
Q13867	BLMH_HUMAN	455	11	50	49	99	58	59
Q13882	PTK6_HUMAN	451	10	52	45	97	62	54
Q13884	SNTB1_HUMAN	538	6	62	30	92	68	35
Q13976	KGP1_HUMAN	671	11	91	61	152	101	71
Q14031	CO4A6_HUMAN	1691	21	134	50	184	153	69
Q14140	SRTD2_HUMAN	314	6	22	16	38	28	21
Q14147	DHX34_HUMAN	1143	20	134	77	211	153	96
Q14152	EIF3A_HUMAN	1382	7	297	74	371	304	80
Q14168	MPP2_HUMAN	576	6	67	42	109	72	48
Q14188	TFDP2_HUMAN	446	7	50	24	74	56	31
Q14242	SELPL_HUMAN	412	3	20	12	32	23	15
Q14246	AGRE1_HUMAN	886	59	65	82	147	120	137
Q14289	FAK2_HUMAN	1009	23	117	75	192	136	97
Q14315	FLNC_HUMAN	2725	45	259	182	441	298	225
Q14392	LRC32_HUMAN	662	18	45	30	75	63	48
Q14416	GRM2_HUMAN	872	31	80	87	167	107	117
Q14451	GRB7_HUMAN	532	15	61	38	99	76	50
Q14469	HES1_HUMAN	280	4	26	12	38	30	16
Q14493	SLBP_HUMAN	270	5	44	20	64	47	25
Q14515	SPRL1_HUMAN	664	15	66	32	98	80	47
Q14520	HABP2_HUMAN	560	37	52	52	104	87	84
Q14524	SCN5A_HUMAN	2016	42	176	207	383	213	244
Q14563	SEM3A_HUMAN	771	19	94	77	171	112	94
Q14566	MCM6_HUMAN	821	17	100	55	155	115	71
Q14596	NBR1_HUMAN	966	20	85	50	135	105	67
Q14644	RASA3_HUMAN	834	21	107	86	193	127	105
Q14667	BLTP2_HUMAN	2235	45	228	164	392	270	205
Q14669	TRIPC_HUMAN	2067	34	250	120	370	282	154
Q14684	RRP1B_HUMAN	758	7	124	40	164	131	44
Q14686	NCOA6_HUMAN	2063	6	117	34	151	123	40
Q14738	2A5D_HUMAN	602	6	82	53	135	86	58
Q14739	LBR_HUMAN	615	7	71	79	150	78	83
Q14774	HLX_HUMAN	488	5	40	25	65	45	28
Q14790	CASP8_HUMAN	479	13	57	38	95	67	50
Q14802	FXYD3_HUMAN	87	4	6	6	12	8	10
Q14839	CHD4_HUMAN	1912	27	270	134	404	295	158
Q14849	STAR3_HUMAN	445	4	49	52	101	53	55
Q14896	MYPC3_HUMAN	1274	21	146	93	239	163	113
Q14919	NC2A_HUMAN	205	2	26	8	34	28	10
Q14938	NFIX_HUMAN	502	9	48	39	87	57	46
Q14940	SL9A5_HUMAN	896	14	84	76	160	98	89
Q14943	KI3S1_HUMAN	382	12	38	33	71	46	44
Q14995	NR1D2_HUMAN	579	18	62	36	98	77	54
Q14C86	GAPD1_HUMAN	1478	26	156	84	240	180	109
Q14CM0	FRPD4_HUMAN	1322	21	134	72	206	153	93
Q14CW9	AT7L3_HUMAN	347	10	47	22	69	54	31
Q14CX7	NAA25_HUMAN	972	16	122	85	207	136	98
Q14CZ0	HAPR1_HUMAN	275	4	36	15	51	40	19
Q15020	SART3_HUMAN	963	15	133	75	208	147	89
Q15021	CND1_HUMAN	1401	25	157	79	236	180	101
Q15024	EXOS7_HUMAN	291	11	32	16	48	42	27
Q15027	ACAP1_HUMAN	740	16	89	39	128	105	54
Q15034	HERC3_HUMAN	1050	26	85	101	186	110	126
Q15038	DAZP2_HUMAN	168	1	4	12	16	5	13
Q15051	IQCB1_HUMAN	598	8	83	39	122	90	45
Q15056	IF4H_HUMAN	248	1	37	22	59	38	22
Q15070	OXA1L_HUMAN	435	7	40	33	73	46	40
Q15077	P2RY6_HUMAN	328	15	31	38	69	46	52
Q15120	PDK3_HUMAN	406	3	49	48	97	52	51
Q15125	EBP_HUMAN	230	4	16	34	50	20	38
Q15172	2A5A_HUMAN	486	6	63	47	110	68	51
Q15185	TEBP_HUMAN	160	5	20	15	35	25	19
Q15269	PWP2_HUMAN	919	17	93	92	185	107	108
Q15276	RABE1_HUMAN	862	7	120	31	151	126	38
Q15283	RASA2_HUMAN	850	24	104	75	179	126	97
Q15319	PO4F3_HUMAN	338	5	33	17	50	38	21
Q15326	ZMY11_HUMAN	602	25	104	45	149	125	66
Q15329	E2F5_HUMAN	346	4	29	13	42	33	17
Q15366	PCBP2_HUMAN	365	7	28	11	39	35	18
Q15386	UBE3C_HUMAN	1083	19	114	108	222	130	125
Q15393	SF3B3_HUMAN	1217	19	113	99	212	129	117
Q15418	KS6A1_HUMAN	735	7	85	62	147	91	68
Q15435	PP1R7_HUMAN	360	2	46	14	60	47	16
Q15459	SF3A1_HUMAN	793	1	86	44	130	87	45
Q15543	TAF13_HUMAN	124	1	19	10	29	19	11
Q15573	TAF1A_HUMAN	450	4	62	58	120	66	62
Q15582	BGH3_HUMAN	683	11	68	36	104	79	47
Q155Q3	DIXC1_HUMAN	683	8	83	32	115	90	40
Q15643	TRIPB_HUMAN	1979	12	270	57	327	281	69
Q15645	PCH2_HUMAN	432	6	46	30	76	51	36
Q15646	OASL_HUMAN	514	9	61	49	110	69	57
Q15648	MED1_HUMAN	1581	17	154	67	221	170	84
Q15652	JHD2C_HUMAN	2540	36	307	133	440	338	166
Q15654	TRIP6_HUMAN	476	26	42	26	68	65	50
Q15726	KISS1_HUMAN	138	2	13	7	20	15	9
Q15735	PI5PA_HUMAN	1006	8	86	60	146	93	68
Q15738	NSDHL_HUMAN	373	5	37	35	72	41	40
Q15744	CEBPE_HUMAN	281	5	36	15	51	41	20
Q15746	MYLK_HUMAN	1914	48	217	105	322	263	153
Q15811	ITSN1_HUMAN	1721	15	225	102	327	237	114
Q15813	TBCE_HUMAN	527	11	61	31	92	69	42
Q15818	NPTX1_HUMAN	432	9	44	27	71	52	36
Q15835	GRK1_HUMAN	563	11	69	58	127	79	67
Q15836	VAMP3_HUMAN	100	1	13	7	20	14	8
Q15848	ADIPO_HUMAN	244	2	19	25	44	21	27
Q16181	SEPT7_HUMAN	437	5	71	26	97	76	31
Q16270	IBP7_HUMAN	282	18	30	7	37	48	24
Q16281	CNGA3_HUMAN	694	7	88	61	149	94	67
Q16342	PDCD2_HUMAN	344	19	32	29	61	49	46
Q16363	LAMA4_HUMAN	1823	46	192	142	334	230	186
Q16514	TAF12_HUMAN	161	2	19	7	26	21	9
Q16533	SNPC1_HUMAN	368	4	66	30	96	69	33
Q16548	B2LA1_HUMAN	175	5	19	21	40	24	25
Q16563	SYPL1_HUMAN	259	6	18	34	52	24	39
Q16568	CART_HUMAN	116	6	18	4	22	23	10
Q16572	VACHT_HUMAN	532	7	34	45	79	41	52
Q16584	M3K11_HUMAN	847	11	96	52	148	107	63
Q16594	TAF9_HUMAN	264	2	30	12	42	32	13
Q16617	NKG7_HUMAN	165	5	2	18	20	7	22
Q16627	CCL14_HUMAN	93	4	11	11	22	15	15
Q16629	SRSF7_HUMAN	238	4	62	19	81	65	23
Q16637	SMN_HUMAN	294	8	27	19	46	33	27
Q16659	MK06_HUMAN	721	11	68	61	129	78	70
Q16665	HIF1A_HUMAN	826	15	82	49	131	96	62
Q16667	CDKN3_HUMAN	212	12	22	14	36	34	25
Q16696	CP2AD_HUMAN	494	3	65	58	123	68	60
Q16718	NDUA5_HUMAN	116	1	17	6	23	18	7
Q16798	MAON_HUMAN	604	11	61	47	108	71	57
Q16821	PPR3A_HUMAN	1122	23	115	72	187	136	93
Q16825	PTN21_HUMAN	1174	16	127	87	214	142	102
Q16836	HCDH_HUMAN	314	1	40	23	63	41	24
Q16849	PTPRN_HUMAN	979	17	81	48	129	97	63
Q16878	CDO1_HUMAN	200	4	20	17	37	24	21
Q16891	MIC60_HUMAN	758	7	92	34	126	99	40
Q17R31	TATD3_HUMAN	274	4	31	13	44	35	17
Q17RB8	LONF1_HUMAN	773	32	98	56	154	126	82
Q17RW2	COOA1_HUMAN	1714	15	166	67	233	181	80
Q1RMZ1	SAMTR_HUMAN	405	11	48	37	85	58	47
Q1W6H9	F110C_HUMAN	321	5	46	12	58	49	16
Q24JP5	T132A_HUMAN	1023	17	90	52	142	107	68
Q29RF7	PDS5A_HUMAN	1337	27	170	79	249	195	104
Q2KHT3	CL16A_HUMAN	1053	17	93	72	165	108	89
Q2M1P5	KIF7_HUMAN	1343	16	188	46	234	204	62
Q2M1Z3	RHG31_HUMAN	1444	24	137	61	198	161	84
Q2M385	MPEG1_HUMAN	716	18	62	63	125	77	78
Q2M389	WASC4_HUMAN	1173	18	147	118	265	163	136
Q2NKJ3	CTC1_HUMAN	1217	43	100	82	182	141	121
Q2PPJ7	RGPA2_HUMAN	1873	43	182	150	332	220	190
Q2QGD7	ZXDC_HUMAN	858	25	75	37	112	95	62
Q2TAC2	CCD57_HUMAN	915	5	134	21	155	137	26
Q2TAC6	KIF19_HUMAN	998	10	139	35	174	147	45
Q2TAK8	PWP3A_HUMAN	710	19	101	35	136	119	53
Q2TAL6	VWC2_HUMAN	325	29	34	16	50	60	44
Q2TBA0	KLH40_HUMAN	621	17	68	53	121	81	69
Q2WEN9	CEA16_HUMAN	425	7	29	29	58	36	35
Q30154	DRB5_HUMAN	266	5	25	27	52	30	31
Q3KNS6	ZN829_HUMAN	432	24	53	37	90	77	59
Q3KNV8	PCGF3_HUMAN	242	12	36	16	52	47	27
Q3KR37	ASTRB_HUMAN	738	13	88	67	155	101	79
Q3KRB8	RHGBB_HUMAN	267	6	36	20	56	42	26
Q3LI59	KR212_HUMAN	83	18	4	17	21	21	35
Q3LI64	KRA61_HUMAN	71	9	3	18	21	12	26
Q3LI72	KR195_HUMAN	72	4	3	22	25	7	26
Q3LI76	KR151_HUMAN	137	15	6	19	25	21	31
Q3LXA3	TKFC_HUMAN	575	6	53	16	69	59	22
Q3MUY2	PIGY_HUMAN	71	2	2	11	13	4	13
Q3SXY7	LRIT3_HUMAN	679	22	56	47	103	76	67
Q3SY84	K2C71_HUMAN	523	9	68	30	98	76	39
Q3YBM2	T176B_HUMAN	270	8	20	18	38	28	26
Q3ZCM7	TBB8_HUMAN	444	9	36	40	76	45	48
Q495M9	USH1G_HUMAN	461	7	63	25	88	69	31
Q496J9	SV2C_HUMAN	727	18	63	98	161	79	115
Q496M5	PLK5_HUMAN	336	7	21	21	42	28	28
Q49A88	CCD14_HUMAN	953	17	125	37	162	139	54
Q4FZB7	KMT5B_HUMAN	885	22	141	49	190	160	70
Q4G0J3	LARP7_HUMAN	582	5	124	26	150	128	31
Q4G0N8	SL9C1_HUMAN	1177	21	115	131	246	134	151
Q4G163	FBX43_HUMAN	708	22	97	39	136	116	59
Q4KWH8	PLCH1_HUMAN	1693	37	207	109	316	242	141
Q4U2R8	S22A6_HUMAN	563	13	41	49	90	53	61
Q504T8	MIDN_HUMAN	468	11	48	14	62	57	25
Q53EP0	FND3B_HUMAN	1204	38	99	96	195	136	133
Q53ET0	CRTC2_HUMAN	693	4	46	25	71	50	29
Q53FA7	QORX_HUMAN	332	3	27	22	49	30	25
Q53FZ2	ACSM3_HUMAN	586	10	71	57	128	79	66
Q53GL0	PKHO1_HUMAN	409	4	66	18	84	68	21
Q53GL7	PAR10_HUMAN	1025	17	78	40	118	93	56
Q53QV2	LBH_HUMAN	105	4	11	5	16	14	9
Q53RT3	APRV1_HUMAN	343	3	32	24	56	35	27
Q53S33	BOLA3_HUMAN	107	1	17	5	22	18	6
Q53TS8	CTSRT_HUMAN	1820	15	241	118	359	254	131
Q56P42	PYDC2_HUMAN	97	2	8	6	14	10	8
Q58DX5	NADL2_HUMAN	795	12	76	61	137	87	71
Q5DID0	UROL1_HUMAN	1318	44	100	94	194	142	133
Q5H9R7	PP6R3_HUMAN	873	17	73	50	123	88	66
Q5HYN5	CT451_HUMAN	189	4	37	10	47	39	14
Q5HYW2	NHSL2_HUMAN	1225	11	125	49	174	135	60
Q5I7T1	AG10B_HUMAN	473	14	37	91	128	51	99
Q5IJ48	CRUM2_HUMAN	1285	109	73	70	143	168	175
Q5J8X5	M4A13_HUMAN	152	3	11	22	33	14	25
Q5JPE7	NOMO2_HUMAN	1267	19	109	109	218	127	124
Q5JRA6	TGO1_HUMAN	1907	12	215	95	310	226	107
Q5JSP0	FGD3_HUMAN	725	15	78	34	112	92	47
Q5JTY5	ZNG1C_HUMAN	395	6	40	18	58	46	24
Q5JUK3	KCNT1_HUMAN	1230	33	127	108	235	159	138
Q5JWF2	GNAS1_HUMAN	1037	13	101	64	165	113	76
Q5M9N0	CD158_HUMAN	1113	9	170	27	197	178	36
Q5NUL3	FFAR4_HUMAN	361	11	35	35	70	46	44
Q5QP82	DCA10_HUMAN	559	19	55	34	89	72	53
Q5SQI0	ATAT_HUMAN	421	4	49	22	71	53	26
Q5SQN1	SNP47_HUMAN	464	5	60	23	83	65	28
Q5SW79	CE170_HUMAN	1584	7	218	61	279	222	67
Q5SWA1	PR15B_HUMAN	713	17	61	50	111	78	64
Q5SXH7	PKHS1_HUMAN	465	12	47	40	87	58	48
Q5T0F9	C2D1B_HUMAN	858	4	101	30	131	103	34
Q5T124	UBX11_HUMAN	520	8	55	26	81	62	34
Q5T1H1	EYS_HUMAN	3165	223	228	277	505	437	475
Q5T2D2	TRML2_HUMAN	321	7	34	23	57	40	28
Q5T2S8	ODAD2_HUMAN	1044	27	133	49	182	154	76
Q5T3U5	MRP7_HUMAN	1492	27	111	102	213	135	126
Q5T4F7	SFRP5_HUMAN	317	17	38	23	61	53	40
Q5T4T6	SYC2L_HUMAN	812	9	107	60	167	114	68
Q5T5P2	SKT_HUMAN	1943	11	233	73	306	241	83
Q5T6F0	DCA12_HUMAN	453	10	55	42	97	64	51
Q5T749	KPRP_HUMAN	579	54	46	32	78	94	82
Q5T752	LCE1D_HUMAN	114	22	10	0	10	27	22
Q5T753	LCE1E_HUMAN	118	23	9	0	9	26	23
Q5T7B8	KIF24_HUMAN	1368	24	150	83	233	169	105
Q5T7N3	KANK4_HUMAN	995	11	82	39	121	92	50
Q5T7P3	LCE1B_HUMAN	118	24	10	0	10	28	24
Q5T9G4	ARM12_HUMAN	340	9	37	23	60	44	32
Q5TA45	INT11_HUMAN	600	13	69	48	117	80	60
Q5TA50	CPTP_HUMAN	214	4	24	18	42	28	21
Q5TA76	LCE3A_HUMAN	89	15	9	0	9	20	15
Q5TAT6	CODA1_HUMAN	717	8	77	7	84	85	15
Q5TCM9	LCE5A_HUMAN	118	24	9	0	9	27	24
Q5TCS8	KAD9_HUMAN	1911	25	238	141	379	258	162
Q5TD94	RSH4A_HUMAN	716	4	56	56	112	58	60
Q5TDH0	DDI2_HUMAN	399	8	39	18	57	46	25
Q5TGU0	TSPO2_HUMAN	170	3	8	21	29	11	22
Q5THR3	EFCB6_HUMAN	1501	33	206	136	342	238	163
Q5TIA1	MEI1_HUMAN	1274	32	106	81	187	134	111
Q5UE93	PI3R6_HUMAN	754	15	79	45	124	93	56
Q5VT06	CE350_HUMAN	3117	28	443	142	585	471	168
Q5VT99	LRC38_HUMAN	294	13	25	20	45	37	33
Q5VTD9	GFI1B_HUMAN	330	13	37	26	63	48	38
Q5VTE6	ANGE2_HUMAN	544	20	56	47	103	73	65
Q5VTH2	FLTOP_HUMAN	177	1	20	10	30	21	11
Q5VTY9	HHAT_HUMAN	493	14	31	82	113	43	92
Q5VU43	MYOME_HUMAN	2346	24	279	76	355	301	99
Q5VWC8	HACD4_HUMAN	232	4	18	41	59	22	44
Q5VWZ2	LYPL1_HUMAN	237	5	23	17	40	27	22
Q5VXI9	LIPN_HUMAN	398	4	34	53	87	38	57
Q5VXU9	SHOC1_HUMAN	1444	37	141	122	263	175	154
Q5VYK3	ECM29_HUMAN	1845	32	194	98	292	224	129
Q5VZY2	PLPP4_HUMAN	271	10	24	28	52	33	37
Q5W041	ARMC3_HUMAN	872	14	109	46	155	122	59
Q5XKL5	BTBD8_HUMAN	1792	42	210	85	295	246	125
Q5XKP0	MIC13_HUMAN	118	1	13	12	25	14	13
Q5XXA6	ANO1_HUMAN	986	18	129	109	238	147	127
Q5ZPR3	CD276_HUMAN	534	13	31	33	64	43	45
Q60I27	AL2CL_HUMAN	953	23	94	76	170	114	96
Q63HQ2	EGFLA_HUMAN	1017	31	97	82	179	126	110
Q63ZY6	NSN5C_HUMAN	315	11	33	16	49	42	27
Q66GS9	CP135_HUMAN	1140	8	193	38	231	200	46
Q66K80	RUAS1_HUMAN	236	6	22	14	36	27	19
Q684P5	RPGP2_HUMAN	730	9	82	52	134	89	59
Q685J3	MUC17_HUMAN	4493	24	96	75	171	117	98
Q687X5	STEA4_HUMAN	459	10	47	49	96	57	58
Q68CZ6	HAUS3_HUMAN	603	7	76	38	114	82	44
Q68D06	SLN13_HUMAN	897	26	98	74	172	122	95
Q68DD2	PA24F_HUMAN	849	15	73	71	144	86	83
Q68E01	INT3_HUMAN	1043	27	108	67	175	132	90
Q68EM7	RHG17_HUMAN	881	7	80	37	117	87	44
Q68G74	LHX8_HUMAN	356	21	41	20	61	57	40
Q69YH5	CDCA2_HUMAN	1023	27	146	44	190	170	69
Q6AI14	SL9A4_HUMAN	798	11	75	90	165	86	100
Q6DN12	MCTP2_HUMAN	878	15	111	67	178	125	80
Q6DN72	FCRL6_HUMAN	434	14	40	29	69	51	42
Q6DN90	IQEC1_HUMAN	963	15	121	57	178	136	69
Q6ECI4	ZN470_HUMAN	717	43	91	54	145	130	97
Q6EMB2	TTLL5_HUMAN	1281	17	141	85	226	156	101
Q6FI81	CPIN1_HUMAN	312	10	33	12	45	42	22
Q6GMV2	SMYD5_HUMAN	418	22	39	31	70	60	50
Q6GPH4	XAF1_HUMAN	301	22	41	16	57	60	33
Q6GYQ0	RGPA1_HUMAN	2036	33	193	149	342	225	179
Q6IA17	SIGIR_HUMAN	410	10	39	34	73	47	42
Q6IBW4	CNDH2_HUMAN	605	8	60	42	102	68	49
Q6ICB0	DESI1_HUMAN	168	2	9	15	24	11	17
Q6ICB4	SESQ2_HUMAN	259	8	25	20	45	30	28
Q6IE81	JADE1_HUMAN	842	28	118	55	173	141	81
Q6IN84	MRM1_HUMAN	353	8	35	13	48	43	21
Q6IQ22	RAB12_HUMAN	244	6	36	16	52	41	20
Q6IQ23	PKHA7_HUMAN	1121	10	154	65	219	163	73
Q6IQ26	DEN5A_HUMAN	1287	27	143	107	250	167	132
Q6IWH7	ANO7_HUMAN	933	21	93	110	203	114	130
Q6MZP7	LIN54_HUMAN	749	24	61	21	82	83	42
Q6NS38	ALKB2_HUMAN	261	3	39	22	61	42	25
Q6NSW7	NANP8_HUMAN	305	9	23	25	48	32	33
Q6NUI2	GPAT2_HUMAN	795	25	66	61	127	89	83
Q6NUI6	CHADL_HUMAN	762	22	82	27	109	102	48
Q6NVH7	SWAP1_HUMAN	229	4	15	12	27	19	16
Q6NW34	RMP64_HUMAN	567	15	85	35	120	99	48
Q6NW40	RGMB_HUMAN	437	17	36	28	64	52	43
Q6P1W5	CA094_HUMAN	598	12	56	35	91	68	47
Q6P2D0	ZFP1_HUMAN	407	17	56	39	95	73	55
Q6P2D8	XRRA1_HUMAN	792	12	101	50	151	113	61
Q6P2P2	ANM9_HUMAN	845	19	69	61	130	87	80
Q6P3W2	DJC24_HUMAN	149	6	15	13	28	19	19
Q6P461	ACSM6_HUMAN	480	16	49	46	95	62	60
Q6P4A8	LYLAP_HUMAN	553	5	58	68	126	63	73
Q6P4F1	OFUT3_HUMAN	479	10	62	58	120	72	68
Q6P4R8	NFRKB_HUMAN	1299	8	127	53	180	135	60
Q6P988	NOTUM_HUMAN	496	17	51	39	90	66	54
Q6PCB0	VWA1_HUMAN	445	2	32	24	56	34	26
Q6PGN9	PSRC1_HUMAN	363	2	50	5	55	52	7
Q6PGP7	SKI3_HUMAN	1564	37	179	123	302	212	155
Q6PIU1	KCNV1_HUMAN	500	15	48	49	97	62	63
Q6PIU2	NCEH1_HUMAN	408	5	35	41	76	40	46
Q6PJG6	BRAT1_HUMAN	821	30	55	44	99	83	73
Q6PJT7	ZC3HE_HUMAN	736	17	80	41	121	94	58
Q6Q759	SPG17_HUMAN	2223	21	274	144	418	292	162
Q6R327	RICTR_HUMAN	1708	37	188	106	294	221	141
Q6RFH8	DUX4C_HUMAN	374	4	41	18	59	45	22
Q6S5L8	SHC4_HUMAN	630	19	63	31	94	81	47
Q6SJ93	F111B_HUMAN	734	21	102	66	168	120	84
Q6TCH7	PAQR3_HUMAN	311	12	20	52	72	32	61
Q6TFL4	KLH24_HUMAN	600	24	63	60	123	84	82
Q6U736	OPN5_HUMAN	354	12	31	49	80	43	59
Q6UB28	MAP12_HUMAN	335	7	27	22	49	33	29
Q6UB35	C1TM_HUMAN	978	16	105	46	151	120	62
Q6ULP2	AFTIN_HUMAN	936	14	71	55	126	84	69
Q6UVW9	CLC2A_HUMAN	174	6	19	24	43	24	29
Q6UW63	PLGT2_HUMAN	502	9	67	57	124	76	63
Q6UW88	EPGN_HUMAN	154	9	12	16	28	18	23
Q6UWE0	LRSM1_HUMAN	723	18	88	25	113	105	43
Q6UWF3	SCIMP_HUMAN	145	2	15	13	28	17	14
Q6UWJ1	SL9D1_HUMAN	677	9	66	53	119	74	62
Q6UWP7	LCLT1_HUMAN	414	8	47	58	105	55	63
Q6UX15	LAYN_HUMAN	382	12	38	32	70	49	44
Q6UX27	VSTM1_HUMAN	236	6	18	16	34	22	21
Q6UXD5	SE6L2_HUMAN	910	27	52	59	111	76	85
Q6UXH0	ANGL8_HUMAN	198	1	21	8	29	22	9
Q6UXN8	CLC9A_HUMAN	241	14	20	25	45	32	37
Q6UXS9	CASPC_HUMAN	341	5	30	30	60	34	35
Q6UXZ3	CLM5_HUMAN	194	4	17	17	34	20	19
Q6UXZ4	UNC5D_HUMAN	953	37	82	74	156	116	105
Q6V0L0	CP26C_HUMAN	522	11	58	35	93	69	45
Q6V1P9	PCD23_HUMAN	3371	34	232	248	480	264	280
Q6WKZ4	RFIP1_HUMAN	1283	7	137	41	178	144	48
Q6WN34	CRDL2_HUMAN	429	32	47	25	72	75	54
Q6X4W1	NSMF_HUMAN	530	8	78	40	118	86	47
Q6XPS3	TPTE2_HUMAN	522	7	67	63	130	74	70
Q6XUX3	DUSTY_HUMAN	929	26	104	61	165	125	86
Q6XZB0	LIPI_HUMAN	460	17	50	52	102	66	68
Q6YN16	HSDL2_HUMAN	418	5	45	29	74	50	34
Q6ZMJ2	SCAR5_HUMAN	495	12	61	22	83	72	34
Q6ZMP0	THSD4_HUMAN	1018	60	99	72	171	152	131
Q6ZMS7	ZN783_HUMAN	546	13	69	28	97	82	40
Q6ZMT4	KDM7A_HUMAN	941	23	116	72	188	135	93
Q6ZMU5	TRI72_HUMAN	477	16	50	27	77	66	40
Q6ZMZ0	RN19B_HUMAN	732	35	68	33	101	101	65
Q6ZNB7	ALKMO_HUMAN	445	4	30	70	100	33	73
Q6ZNC8	MBOA1_HUMAN	495	10	36	73	109	45	81
Q6ZNE9	RUFY4_HUMAN	571	19	77	27	104	93	45
Q6ZNH5	ZN497_HUMAN	498	31	59	31	90	87	62
Q6ZPD8	DG2L6_HUMAN	337	3	32	49	81	35	51
Q6ZRF8	RN207_HUMAN	634	24	68	31	99	87	53
Q6ZRI0	OTOG_HUMAN	2925	206	200	176	376	392	372
Q6ZRQ5	MMS22_HUMAN	1243	33	118	124	242	148	155
Q6ZS10	CL17A_HUMAN	378	15	28	35	63	41	49
Q6ZSG1	ARK2C_HUMAN	346	7	32	20	52	37	27
Q6ZSM3	MOT12_HUMAN	516	21	35	58	93	54	79
Q6ZTW0	TPGS1_HUMAN	290	4	34	16	50	38	20
Q6ZUJ8	BCAP_HUMAN	805	14	80	54	134	90	67
Q6ZUM4	RHG27_HUMAN	889	12	85	67	152	96	79
Q6ZV73	FGD6_HUMAN	1430	33	172	86	258	200	118
Q6ZW61	BBS12_HUMAN	710	22	53	53	106	73	74
Q6ZWK4	RHEX_HUMAN	172	3	10	14	24	13	17
Q70CQ2	UBP34_HUMAN	3546	101	323	283	606	416	380
Q70EL3	UBP50_HUMAN	339	21	33	39	72	51	58
Q70IA6	MOB2_HUMAN	237	6	24	25	49	29	30
Q70YC5	ZN365_HUMAN	407	7	61	22	83	64	29
Q70Z35	PREX2_HUMAN	1606	46	202	120	322	244	161
Q71DI3	H32_HUMAN	136	1	29	7	36	30	8
Q71F56	MD13L_HUMAN	2210	51	172	150	322	216	197
Q71RC2	LARP4_HUMAN	724	12	74	48	122	85	59
Q71SY5	MED25_HUMAN	747	9	40	36	76	49	45
Q75V66	ANO5_HUMAN	913	13	98	129	227	110	142
Q76EJ3	S35D2_HUMAN	337	6	21	38	59	27	44
Q76FK4	NOL8_HUMAN	1167	16	187	61	248	202	76
Q76I76	SSH2_HUMAN	1423	29	130	69	199	158	98
Q76L83	ASXL2_HUMAN	1435	23	157	46	203	177	66
Q7L190	DPPA4_HUMAN	304	6	45	11	56	50	15
Q7L2R6	ZN765_HUMAN	523	31	75	53	128	93	83
Q7L3B6	CD37L_HUMAN	337	9	39	30	69	47	38
Q7L3V2	BOP_HUMAN	364	10	23	24	47	32	32
Q7L513	FCRLA_HUMAN	359	8	22	26	48	29	33
Q7L5D6	GET4_HUMAN	327	4	30	33	63	34	36
Q7L8J4	3BP5L_HUMAN	393	4	52	10	62	55	14
Q7L8S5	OTU6A_HUMAN	288	3	42	19	61	44	21
Q7RTN6	STRAA_HUMAN	431	6	35	37	72	41	43
Q7RTU3	OLIG3_HUMAN	272	4	28	8	36	32	12
Q7RTU4	BHA09_HUMAN	235	7	33	4	37	38	11
Q7Z3B1	NEGR1_HUMAN	354	12	25	29	54	35	41
Q7Z3E5	ARMC9_HUMAN	818	13	86	57	143	98	70
Q7Z3I7	ZN572_HUMAN	529	34	58	47	105	81	79
Q7Z3Q1	S46A3_HUMAN	461	14	28	69	97	41	81
Q7Z3S7	CA2D4_HUMAN	1137	23	99	104	203	121	126
Q7Z3S9	NT2NA_HUMAN	236	33	16	20	36	44	50
Q7Z3Y8	K1C27_HUMAN	459	11	46	22	68	57	31
Q7Z3Y9	K1C26_HUMAN	468	13	46	25	71	58	35
Q7Z3Z4	PIWL4_HUMAN	852	23	100	72	172	121	95
Q7Z403	TMC6_HUMAN	805	24	76	71	147	99	94
Q7Z410	TMPS9_HUMAN	1059	38	92	69	161	125	105
Q7Z418	KCNKI_HUMAN	384	15	31	49	80	45	61
Q7Z419	R144B_HUMAN	303	33	30	18	48	63	46
Q7Z4G4	TRM11_HUMAN	463	7	56	53	109	62	60
Q7Z4K8	TRI46_HUMAN	759	32	82	46	128	114	75
Q7Z4N8	P4HA3_HUMAN	544	6	56	54	110	62	59
Q7Z4V0	ZN438_HUMAN	828	23	102	38	140	121	59
Q7Z591	AKNA_HUMAN	1439	14	138	58	196	152	71
Q7Z5P9	MUC19_HUMAN	8384	134	408	223	631	531	346
Q7Z614	SNX20_HUMAN	316	9	43	22	65	50	31
Q7Z6J0	SH3R1_HUMAN	888	20	75	32	107	92	51
Q7Z6M3	MILR1_HUMAN	343	12	38	31	69	48	41
Q7Z7H8	RM10_HUMAN	261	4	29	11	40	33	15
Q7Z7M0	MEGF8_HUMAN	2845	195	209	210	419	383	388
Q86SJ2	AMGO2_HUMAN	522	17	51	43	94	66	60
Q86SK9	SCD5_HUMAN	330	4	36	42	78	40	44
Q86SQ9	DHDDS_HUMAN	333	8	46	28	74	51	34
Q86SR1	GLT10_HUMAN	603	13	79	59	138	92	71
Q86TB9	PATL1_HUMAN	770	6	81	40	121	87	46
Q86TI0	TBCD1_HUMAN	1168	23	138	77	215	159	97
Q86TU7	SETD3_HUMAN	594	6	75	52	127	79	57
Q86U70	LDB1_HUMAN	411	11	43	37	80	53	47
Q86U86	PB1_HUMAN	1689	22	231	133	364	250	155
Q86UC2	RSPH3_HUMAN	560	10	70	32	102	80	42
Q86UD4	ZN329_HUMAN	541	32	69	38	107	95	70
Q86UE6	LRRT1_HUMAN	522	19	42	43	85	59	61
Q86UL3	GPAT4_HUMAN	456	8	56	48	104	64	54
Q86UP2	KTN1_HUMAN	1357	5	217	43	260	220	48
Q86UT6	NLRX1_HUMAN	975	18	95	67	162	112	82
Q86UT8	CATAC_HUMAN	332	9	48	26	74	55	33
Q86UY6	NAA40_HUMAN	237	10	35	23	58	45	32
Q86V42	F124A_HUMAN	546	11	50	39	89	60	46
Q86VD7	S2542_HUMAN	318	1	40	31	71	41	32
Q86VH2	KIF27_HUMAN	1401	20	208	62	270	226	82
Q86VI4	LAP4B_HUMAN	317	11	30	29	59	41	39
Q86VP1	TAXB1_HUMAN	789	19	103	55	158	118	72
Q86VV8	RTTN_HUMAN	2226	67	184	132	316	247	195
Q86VW1	S22AG_HUMAN	577	13	43	77	120	55	89
Q86VX9	MON1A_HUMAN	652	10	74	50	124	81	59
Q86W24	NAL14_HUMAN	1093	52	118	88	206	164	135
Q86W50	MET16_HUMAN	562	14	75	36	111	87	48
Q86W92	LIPB1_HUMAN	1011	10	131	53	184	140	62
Q86WA6	BPHL_HUMAN	291	3	36	26	62	39	29
Q86WA8	LONP2_HUMAN	852	9	101	33	134	110	42
Q86WG5	MTMRD_HUMAN	1849	36	192	151	343	226	183
Q86WT1	IT70A_HUMAN	665	14	64	66	130	77	76
Q86WU2	LDHD_HUMAN	507	15	46	28	74	60	42
Q86WX3	AROS_HUMAN	136	2	31	7	38	33	9
Q86X24	HORM1_HUMAN	394	9	51	27	78	60	36
Q86X76	NIT1_HUMAN	327	15	28	21	49	42	36
Q86XE3	MICU3_HUMAN	530	5	71	58	129	76	63
Q86XF0	DYR2_HUMAN	187	2	24	16	40	26	18
Q86XL3	ANKL2_HUMAN	938	15	120	59	179	133	74
Q86XQ3	CTSR3_HUMAN	398	5	37	52	89	42	55
Q86Y25	Z354C_HUMAN	554	29	71	57	128	93	86
Q86Y39	NDUAB_HUMAN	141	4	11	16	27	15	20
Q86Y82	STX12_HUMAN	276	2	34	12	46	36	14
Q86YA3	ZGRF1_HUMAN	2104	43	221	143	364	261	183
Q86YC3	LRC33_HUMAN	692	20	49	48	97	68	68
Q86YD3	TMM25_HUMAN	366	4	27	18	45	31	22
Q86YP4	P66A_HUMAN	633	6	77	14	91	83	20
Q86YT5	S13A5_HUMAN	568	11	42	61	103	52	70
Q86YT6	MIB1_HUMAN	1006	42	116	44	160	152	86
Q86YW5	TRML1_HUMAN	311	7	21	12	33	28	18
Q8IU85	KCC1D_HUMAN	385	7	46	33	79	52	40
Q8IUC4	RHPN2_HUMAN	686	11	75	53	128	84	63
Q8IUC6	TCAM1_HUMAN	712	17	46	30	76	62	46
Q8IUC8	GLT13_HUMAN	556	16	71	49	120	84	64
Q8IUH8	SPP2C_HUMAN	684	19	47	57	104	66	72
Q8IUM7	NPAS4_HUMAN	802	13	41	59	100	52	70
Q8IUQ4	SIAH1_HUMAN	282	18	20	20	40	37	38
Q8IV61	GRP3_HUMAN	690	18	75	57	132	92	72
Q8IVF7	FMNL3_HUMAN	1028	16	138	69	207	152	84
Q8IVL1	NAV2_HUMAN	2488	23	275	102	377	296	124
Q8IVP5	FUND1_HUMAN	155	1	18	16	34	19	16
Q8IVU3	HERC6_HUMAN	1022	26	113	83	196	137	107
Q8IVW4	CDKL3_HUMAN	592	8	87	38	125	94	45
Q8IW19	APLF_HUMAN	511	12	54	24	78	66	35
Q8IWA4	MFN1_HUMAN	741	14	87	54	141	98	66
Q8IWI9	MGAP_HUMAN	3065	38	352	134	486	389	168
Q8IWQ3	BRSK2_HUMAN	736	11	95	42	137	105	52
Q8IWS0	PHF6_HUMAN	365	20	60	21	81	75	37
Q8IWT1	SCN4B_HUMAN	228	4	27	14	41	31	18
Q8IWU4	ZNT8_HUMAN	369	12	24	30	54	35	41
Q8IWV2	CNTN4_HUMAN	1026	14	101	81	182	115	95
Q8IWV7	UBR1_HUMAN	1749	59	174	151	325	227	202
Q8IWW6	RHG12_HUMAN	846	6	106	67	173	111	73
Q8IWW8	HOT_HUMAN	467	8	40	33	73	48	41
Q8IWY4	SCUB1_HUMAN	988	90	98	65	163	179	154
Q8IWZ3	ANKH1_HUMAN	2542	35	209	87	296	243	121
Q8IX01	SUGP2_HUMAN	1082	16	143	70	213	158	85
Q8IX07	FOG1_HUMAN	1006	29	92	40	132	121	62
Q8IXA5	SACA3_HUMAN	215	12	20	18	38	31	27
Q8IXB3	TARG1_HUMAN	177	2	17	6	23	19	7
Q8IXF0	NPAS3_HUMAN	933	9	94	53	147	102	60
Q8IXH6	T53I2_HUMAN	220	3	23	14	37	26	17
Q8IXH7	NELFD_HUMAN	590	11	48	46	94	58	57
Q8IXJ9	ASXL1_HUMAN	1541	29	161	59	220	189	86
Q8IXK2	GLT12_HUMAN	581	15	72	53	125	85	67
Q8IXL7	MSRB3_HUMAN	192	11	18	14	32	28	24
Q8IXM3	RM41_HUMAN	137	1	21	16	37	21	17
Q8IXP5	OCAT1_HUMAN	288	3	17	24	41	20	27
Q8IXU6	S35F2_HUMAN	374	9	25	43	68	34	49
Q8IXZ2	ZC3H3_HUMAN	948	26	146	38	184	168	62
Q8IY17	PLPL6_HUMAN	1375	26	151	82	233	173	105
Q8IY21	DDX60_HUMAN	1712	35	218	165	383	248	197
Q8IY37	DHX37_HUMAN	1157	19	156	65	221	175	80
Q8IY63	AMOL1_HUMAN	956	6	113	42	155	118	48
Q8IY81	SPB1_HUMAN	847	7	149	50	199	155	57
Q8IY82	DRC7_HUMAN	874	19	119	77	196	137	94
Q8IY95	TM192_HUMAN	271	7	25	18	43	31	25
Q8IYB4	PEX5R_HUMAN	626	4	68	38	106	71	42
Q8IYD1	ERF3B_HUMAN	628	11	72	38	110	83	48
Q8IYD8	FANCM_HUMAN	2048	49	235	132	367	280	175
Q8IYI6	EXOC8_HUMAN	725	12	86	52	138	97	64
Q8IYI8	ZN440_HUMAN	595	34	94	55	149	124	86
Q8IYJ0	PIANP_HUMAN	282	3	22	15	37	25	17
Q8IYJ2	CJ067_HUMAN	551	4	92	34	126	96	38
Q8IYL9	GPR65_HUMAN	337	14	34	43	77	46	54
Q8IYR2	SMYD4_HUMAN	804	35	83	45	128	115	76
Q8IYR6	TEFF1_HUMAN	380	32	40	24	64	67	54
Q8IYT4	KATL2_HUMAN	538	6	68	36	104	74	42
Q8IYV9	IZUM1_HUMAN	350	13	38	25	63	49	36
Q8IYX1	TBC21_HUMAN	336	9	35	39	74	44	46
Q8IZC4	RTKN2_HUMAN	609	16	78	43	121	93	56
Q8IZC6	CORA1_HUMAN	1860	15	167	61	228	182	75
Q8IZF3	AGRF4_HUMAN	695	21	70	56	126	88	77
Q8IZI9	IFNL3_HUMAN	196	8	24	6	30	31	14
Q8IZP1	TBC3A_HUMAN	549	13	75	42	117	87	53
Q8IZQ1	WDFY3_HUMAN	3526	79	336	278	614	406	350
Q8IZR5	CKLF4_HUMAN	234	5	19	23	42	23	28
Q8IZX4	TAF1L_HUMAN	1826	27	226	125	351	249	150
Q8J025	APCD1_HUMAN	514	15	51	50	101	64	65
Q8N0Y2	ZN444_HUMAN	327	11	34	16	50	45	27
Q8N104	D106A_HUMAN	65	7	10	7	17	15	14
Q8N114	SHSA5_HUMAN	240	14	10	15	25	23	27
Q8N126	CADM3_HUMAN	398	8	32	28	60	39	36
Q8N139	ABCA6_HUMAN	1617	27	159	162	321	181	186
Q8N143	BCL6B_HUMAN	479	19	45	30	75	61	49
Q8N159	NAGS_HUMAN	534	10	53	39	92	62	48
Q8N187	CARTF_HUMAN	725	10	64	34	98	74	43
Q8N1I0	DOCK4_HUMAN	1966	32	223	170	393	250	200
Q8N1M1	BEST3_HUMAN	668	7	65	74	139	72	77
Q8N1T3	MYO1H_HUMAN	1032	19	148	103	251	165	118
Q8N2H9	PELI3_HUMAN	469	20	45	29	74	64	48
Q8N2U9	S66A2_HUMAN	271	4	22	33	55	26	37
Q8N2W9	PIAS4_HUMAN	510	18	50	28	78	67	44
Q8N344	MIER2_HUMAN	545	14	45	33	78	56	47
Q8N3C7	CLIP4_HUMAN	705	15	78	48	126	90	62
Q8N3Y1	FBXW8_HUMAN	598	9	61	51	112	69	60
Q8N414	PGBD5_HUMAN	524	10	59	57	116	69	66
Q8N448	LNX2_HUMAN	690	21	63	36	99	80	55
Q8N474	SFRP1_HUMAN	314	16	43	24	67	58	40
Q8N488	RYBP_HUMAN	228	4	35	7	42	38	11
Q8N4A0	GALT4_HUMAN	578	15	69	61	130	83	76
Q8N4B1	SESQ1_HUMAN	249	4	26	22	48	30	26
Q8N4E7	FTMT_HUMAN	242	5	25	19	44	29	24
Q8N4F4	S22AO_HUMAN	552	15	44	45	89	56	58
Q8N4J0	CARME_HUMAN	409	10	43	46	89	51	56
Q8N556	AFAP1_HUMAN	730	15	109	34	143	124	47
Q8N5H7	SH2D3_HUMAN	860	9	94	50	144	103	57
Q8N5I4	DHRSX_HUMAN	330	4	34	27	61	37	30
Q8N5P1	ZC3H8_HUMAN	291	12	52	20	72	62	30
Q8N5V2	NGEF_HUMAN	710	12	96	43	139	107	55
Q8N5Z0	AADAT_HUMAN	425	3	39	36	75	42	39
Q8N612	FHI1B_HUMAN	972	19	88	54	142	105	70
Q8N668	COMD1_HUMAN	190	1	19	12	31	20	13
Q8N680	ZBTB2_HUMAN	514	16	43	29	72	57	44
Q8N695	SC5A8_HUMAN	610	11	34	77	111	44	86
Q8N6C5	IGSF1_HUMAN	1336	34	92	124	216	120	154
Q8N6D2	RN182_HUMAN	247	17	18	20	38	33	35
Q8N6F7	GCSAM_HUMAN	178	6	18	13	31	23	18
Q8N6L0	KASH5_HUMAN	562	8	53	18	71	61	26
Q8N6R1	SERP2_HUMAN	65	1	9	4	13	10	5
Q8N6S4	AN13C_HUMAN	541	7	65	36	101	71	43
Q8N6U8	GP161_HUMAN	529	14	48	53	101	62	65
Q8N6Y0	USBP1_HUMAN	703	6	73	21	94	77	27
Q8N7B6	PACRL_HUMAN	248	5	34	12	46	39	16
Q8N7H5	PAF1_HUMAN	531	3	63	34	97	66	36
Q8N8N7	PTGR2_HUMAN	351	8	29	24	53	35	32
Q8N8R7	AL14E_HUMAN	260	16	37	18	55	50	34
Q8N9B5	JMY_HUMAN	988	12	139	49	188	150	61
Q8N9E0	F133A_HUMAN	248	2	78	8	86	79	10
Q8N9I5	FADS6_HUMAN	368	8	30	35	65	38	43
Q8N9M5	TM102_HUMAN	508	11	37	31	68	48	41
Q8NA56	TTC29_HUMAN	475	8	62	45	107	69	52
Q8NA61	CBY2_HUMAN	448	7	60	22	82	66	29
Q8NA82	MARHA_HUMAN	808	15	97	46	143	111	61
Q8NAG6	ANKL1_HUMAN	615	15	59	27	86	72	42
Q8NAN2	MIGA1_HUMAN	632	17	67	58	125	84	75
Q8NB14	UBP38_HUMAN	1042	24	85	82	167	108	102
Q8NB16	MLKL_HUMAN	471	10	76	31	107	84	39
Q8NB59	SYT14_HUMAN	555	15	58	46	104	69	60
Q8NB78	KDM1B_HUMAN	822	25	94	76	170	113	100
Q8NBI3	DRAXI_HUMAN	349	10	44	14	58	51	24
Q8NBJ7	SUMF2_HUMAN	301	2	34	32	66	35	33
Q8NBM4	UBAC2_HUMAN	344	7	30	41	71	37	46
Q8NBQ7	AQP11_HUMAN	271	10	14	27	41	24	36
Q8NBU5	ATAD1_HUMAN	361	6	43	22	65	49	28
Q8NBZ0	IN80E_HUMAN	244	2	32	10	42	34	12
Q8NC44	RETR2_HUMAN	543	6	26	26	52	31	31
Q8NCB2	CAMKV_HUMAN	501	6	59	34	93	65	39
Q8NCK7	MOT11_HUMAN	447	4	16	38	54	20	42
Q8NCM2	KCNH5_HUMAN	988	20	111	86	197	130	103
Q8NCM8	DYHC2_HUMAN	4307	61	506	363	869	558	422
Q8NCP5	ZBT44_HUMAN	570	17	56	38	94	69	54
Q8NCR0	B3GL2_HUMAN	500	13	45	48	93	56	61
Q8NCU7	C2C4A_HUMAN	369	11	60	12	72	71	18
Q8NCW6	GLT11_HUMAN	608	15	69	58	127	82	72
Q8ND04	SMG8_HUMAN	991	24	107	72	179	129	96
Q8ND25	ZNRF1_HUMAN	227	9	18	15	33	26	24
Q8NDP4	ZN439_HUMAN	499	31	83	53	136	111	83
Q8NDV1	SIA7C_HUMAN	305	9	38	41	79	47	48
Q8NDV3	SMC1B_HUMAN	1235	22	206	72	278	226	93
Q8NE09	RGS22_HUMAN	1264	21	166	140	306	186	156
Q8NE31	FA13C_HUMAN	585	11	72	26	98	80	36
Q8NE71	ABCF1_HUMAN	845	8	138	45	183	144	53
Q8NEA9	GMCL2_HUMAN	526	15	63	53	116	76	64
Q8NEE6	FXL13_HUMAN	735	33	93	52	145	122	78
Q8NEK8	TET5D_HUMAN	389	9	38	35	73	47	43
Q8NEM7	SP20H_HUMAN	779	17	73	39	112	88	56
Q8NER1	TRPV1_HUMAN	839	16	86	90	176	101	104
Q8NET5	NFAM1_HUMAN	270	6	24	19	43	29	24
Q8NEV9	IL27A_HUMAN	243	1	22	14	36	23	15
Q8NEZ3	WDR19_HUMAN	1342	34	139	120	259	170	151
Q8NEZ4	KMT2C_HUMAN	4911	127	471	233	704	584	344
Q8NEZ5	FBX22_HUMAN	403	14	42	27	69	55	41
Q8NF50	DOCK8_HUMAN	2099	44	238	174	412	278	214
Q8NFD5	ARI1B_HUMAN	2319	19	158	102	260	175	120
Q8NFQ8	TOIP2_HUMAN	470	4	42	26	68	45	29
Q8NFT6	DBF4B_HUMAN	615	24	62	35	97	83	57
Q8NFT8	DNER_HUMAN	737	65	41	47	88	104	108
Q8NFU3	TSTD1_HUMAN	115	1	12	9	21	13	9
Q8NFZ5	TNIP2_HUMAN	429	10	62	12	74	71	22
Q8NHC4	O10J5_HUMAN	309	13	19	34	53	32	45
Q8NHG8	ZNRF2_HUMAN	242	9	17	10	27	25	19
Q8NHH9	ATLA2_HUMAN	583	11	56	52	108	67	61
Q8NHL6	LIRB1_HUMAN	650	11	49	47	96	55	58
Q8NHS0	DNJB8_HUMAN	232	2	29	29	58	31	31
Q8NHS9	SPT22_HUMAN	363	7	47	27	74	53	34
Q8NHZ7	MB3L2_HUMAN	208	4	37	4	41	41	8
Q8NI36	WDR36_HUMAN	895	14	85	74	159	99	87
Q8NI38	IKBD_HUMAN	313	2	25	8	33	27	10
Q8TAG5	VTM2A_HUMAN	236	3	23	18	41	26	21
Q8TAI7	REBL1_HUMAN	183	2	19	18	37	19	20
Q8TAP6	CEP76_HUMAN	659	23	66	50	116	89	71
Q8TAQ2	SMRC2_HUMAN	1214	7	133	63	196	139	70
Q8TAT6	NPL4_HUMAN	608	17	61	53	114	76	70
Q8TAX9	GSDMB_HUMAN	416	5	54	27	81	57	32
Q8TAZ6	CKLF2_HUMAN	248	4	35	19	54	39	23
Q8TB40	ABHD4_HUMAN	342	3	32	32	64	35	35
Q8TB45	DPTOR_HUMAN	409	9	55	26	81	64	34
Q8TBB0	THAP6_HUMAN	222	11	37	17	54	46	27
Q8TBC4	UBA3_HUMAN	463	12	43	36	79	55	48
Q8TBG9	SYNPR_HUMAN	265	6	17	37	54	22	43
Q8TBK2	SETD6_HUMAN	473	7	46	31	77	52	37
Q8TBX8	PI42C_HUMAN	421	3	51	40	91	53	42
Q8TC07	TBC15_HUMAN	691	16	75	64	139	90	75
Q8TC36	SUN5_HUMAN	379	10	38	31	69	47	41
Q8TC44	POC1B_HUMAN	478	10	52	41	93	61	51
Q8TC92	ENOX1_HUMAN	643	9	75	38	113	84	46
Q8TCC7	S22A8_HUMAN	542	10	41	56	97	50	64
Q8TCQ1	MARH1_HUMAN	289	16	34	20	54	48	34
Q8TCS8	PNPT1_HUMAN	783	11	89	42	131	99	51
Q8TCU3	S7A13_HUMAN	470	11	31	56	87	40	67
Q8TCX5	RHPN1_HUMAN	670	14	69	37	106	83	50
Q8TCY9	URGCP_HUMAN	931	13	106	68	174	118	79
Q8TD26	CHD6_HUMAN	2715	50	355	168	523	398	214
Q8TD43	TRPM4_HUMAN	1214	26	123	106	229	146	131
Q8TD46	MO2R1_HUMAN	348	12	32	24	56	43	36
Q8TDB8	GTR14_HUMAN	520	10	33	51	84	43	59
Q8TDF5	NETO1_HUMAN	533	21	60	46	106	80	63
Q8TDI0	CHD5_HUMAN	1954	28	279	153	432	304	178
Q8TDI8	TMC1_HUMAN	760	13	93	97	190	105	106
Q8TDN4	CABL1_HUMAN	633	12	71	33	104	82	43
Q8TDR0	MIPT3_HUMAN	691	6	132	14	146	136	20
Q8TDR4	TCP1L_HUMAN	215	3	33	5	38	36	8
Q8TDU6	GPBAR_HUMAN	330	7	21	27	48	27	34
Q8TDW7	FAT3_HUMAN	4557	61	357	362	719	416	419
Q8TE02	ELP5_HUMAN	300	7	21	18	39	28	25
Q8TE57	ATS16_HUMAN	1224	73	137	100	237	205	162
Q8TE60	ATS18_HUMAN	1221	77	129	104	233	201	172
Q8TE99	PXYP1_HUMAN	480	13	58	45	103	71	53
Q8TEC5	SH3R2_HUMAN	729	14	82	34	116	94	47
Q8TEM1	PO210_HUMAN	1887	16	143	127	270	158	142
Q8TEY5	CR3L4_HUMAN	395	9	38	17	55	47	25
Q8TF30	WHAMM_HUMAN	809	17	112	36	148	127	53
Q8TF63	DCNP1_HUMAN	244	5	26	13	39	31	18
Q8WTR2	DUS19_HUMAN	217	6	22	17	39	27	23
Q8WTX7	CAST1_HUMAN	329	3	22	26	48	24	28
Q8WU03	GLYL2_HUMAN	294	7	33	32	65	38	38
Q8WU68	U2AF4_HUMAN	220	10	26	24	50	34	33
Q8WUF5	IASPP_HUMAN	828	6	69	50	119	74	56
Q8WUI4	HDAC7_HUMAN	952	13	86	39	125	98	51
Q8WUJ0	STYX_HUMAN	223	3	21	20	41	24	22
Q8WUM9	S20A1_HUMAN	679	13	57	59	116	69	70
Q8WUP2	FBLI1_HUMAN	373	27	33	21	54	56	45
Q8WUQ7	CATIN_HUMAN	758	2	138	60	198	139	62
Q8WUY3	PRUN2_HUMAN	3088	37	221	186	407	253	222
Q8WV16	DCAF4_HUMAN	495	14	62	40	102	74	52
Q8WV24	PHLA1_HUMAN	401	9	47	13	60	53	22
Q8WVM7	STAG1_HUMAN	1258	17	149	90	239	165	106
Q8WVM8	SCFD1_HUMAN	642	6	71	51	122	76	56
Q8WVP7	LMBR1_HUMAN	490	9	38	51	89	47	60
Q8WVZ7	RN133_HUMAN	376	12	33	30	63	44	42
Q8WW22	DNJA4_HUMAN	397	12	61	21	82	69	32
Q8WW24	TEKT4_HUMAN	435	12	58	22	80	68	34
Q8WW38	FOG2_HUMAN	1151	39	114	61	175	145	92
Q8WWB7	GLMP_HUMAN	406	6	16	38	54	22	43
Q8WWF5	ZNRF4_HUMAN	429	21	34	24	58	53	45
Q8WWG9	KCNE4_HUMAN	221	3	14	10	24	17	13
Q8WWH4	ASZ1_HUMAN	475	9	57	28	85	65	37
Q8WWN8	ARAP3_HUMAN	1544	31	154	97	251	181	124
Q8WWN9	ICEF1_HUMAN	437	6	55	29	84	59	35
Q8WWQ8	STAB2_HUMAN	2551	202	221	179	400	394	373
Q8WX94	NALP7_HUMAN	980	38	110	74	184	145	109
Q8WXA3	RUFY2_HUMAN	606	13	86	24	110	97	36
Q8WXA8	5HT3C_HUMAN	447	9	29	48	77	37	57
Q8WXF1	PSPC1_HUMAN	523	2	71	29	100	71	31
Q8WXG9	AGRV1_HUMAN	6306	35	401	543	944	434	574
Q8WXH6	RB40A_HUMAN	277	9	36	22	58	45	30
Q8WXI7	MUC16_HUMAN	14507	36	769	528	1297	805	563
Q8WXK3	ASB13_HUMAN	278	13	25	15	40	36	28
Q8WXS8	ATS14_HUMAN	1223	59	116	85	201	170	139
Q8WXX0	DYH7_HUMAN	4024	62	465	360	825	521	420
Q8WY41	NANO1_HUMAN	292	11	30	15	45	41	24
Q8WY64	MYLIP_HUMAN	445	20	45	31	76	64	50
Q8WYJ6	SEPT1_HUMAN	372	8	48	23	71	55	31
Q8WYR4	RSPH1_HUMAN	309	1	30	32	62	31	33
Q8WZ74	CTTB2_HUMAN	1663	42	181	69	250	222	110
Q8WZ75	ROBO4_HUMAN	1007	18	73	50	123	91	67
Q92185	SIA8A_HUMAN	356	10	39	40	79	47	50
Q92187	SIA8D_HUMAN	359	6	54	31	85	58	36
Q92504	S39A7_HUMAN	469	2	29	26	55	31	28
Q92536	YLAT2_HUMAN	515	13	28	62	90	41	73
Q92539	LPIN2_HUMAN	896	15	93	61	154	107	74
Q92541	RTF1_HUMAN	710	4	137	30	167	141	33
Q92563	TICN2_HUMAN	424	25	42	31	73	65	53
Q92600	CNOT9_HUMAN	299	6	30	17	47	35	23
Q92630	DYRK2_HUMAN	601	9	76	35	111	85	43
Q92633	LPAR1_HUMAN	364	11	27	40	67	38	51
Q92636	FAN_HUMAN	917	18	88	86	174	105	103
Q92673	SORL_HUMAN	2214	97	204	218	422	287	313
Q92685	ALG3_HUMAN	438	13	37	61	98	50	74
Q92752	TENR_HUMAN	1358	41	97	106	203	135	145
Q92784	DPF3_HUMAN	378	21	49	24	73	69	41
Q92794	KAT6A_HUMAN	2004	47	227	99	326	270	141
Q92805	GOGA1_HUMAN	767	2	102	25	127	104	27
Q92830	KAT2A_HUMAN	837	17	105	65	170	119	79
Q92833	JARD2_HUMAN	1246	29	185	61	246	212	87
Q92843	B2CL2_HUMAN	193	2	16	21	37	18	23
Q92854	SEM4D_HUMAN	862	24	92	82	174	112	103
Q92888	ARHG1_HUMAN	912	12	109	43	152	120	50
Q92900	RENT1_HUMAN	1129	23	105	84	189	125	104
Q92945	FUBP2_HUMAN	711	5	60	38	98	63	43
Q92956	TNR14_HUMAN	283	23	25	16	41	45	38
Q92995	UBP13_HUMAN	863	13	86	78	164	97	91
Q92997	DVL3_HUMAN	716	6	71	46	117	76	51
Q93015	NAA80_HUMAN	286	5	25	11	36	30	16
Q93038	TNR25_HUMAN	417	33	33	26	59	62	57
Q93045	STMN2_HUMAN	179	2	33	6	39	35	8
Q93088	BHMT1_HUMAN	406	8	47	35	82	55	43
Q969E2	SCAM4_HUMAN	229	6	13	39	52	19	44
Q969F1	TF3C6_HUMAN	213	7	14	10	24	18	17
Q969F9	HPS3_HUMAN	1004	33	105	81	186	134	110
Q969J3	BORC5_HUMAN	196	2	23	8	31	25	10
Q969L4	LSM10_HUMAN	123	1	17	7	24	18	8
Q969N2	PIGT_HUMAN	578	10	51	63	114	60	71
Q969R2	OSBP2_HUMAN	916	17	95	62	157	111	79
Q969R5	LMBL2_HUMAN	705	18	87	61	148	105	71
Q969S6	TM203_HUMAN	136	2	11	21	32	13	23
Q969U6	FBXW5_HUMAN	566	11	51	54	105	62	65
Q969U7	PSMG2_HUMAN	264	7	24	24	48	30	29
Q969X2	SIA7F_HUMAN	333	8	40	32	72	47	39
Q969Y2	GTPB3_HUMAN	492	9	48	15	63	56	23
Q96A44	SPSB4_HUMAN	273	2	32	17	49	34	19
Q96A49	SYAP1_HUMAN	352	1	38	24	62	39	25
Q96A59	MALD3_HUMAN	401	12	55	35	90	66	47
Q96A83	COQA1_HUMAN	441	13	36	14	50	48	26
Q96AQ7	CIDEC_HUMAN	238	6	27	19	46	33	25
Q96AQ8	MCUR1_HUMAN	359	6	50	19	69	54	25
Q96AV8	E2F7_HUMAN	911	8	105	46	151	113	53
Q96AY3	FKB10_HUMAN	582	9	52	47	99	61	56
Q96B02	UBE2W_HUMAN	151	5	15	14	29	20	19
Q96B26	EXOS8_HUMAN	276	10	27	16	43	37	25
Q96B36	AKTS1_HUMAN	256	4	21	11	32	24	14
Q96B86	RGMA_HUMAN	450	16	44	35	79	58	49
Q96B96	LDAF1_HUMAN	161	4	7	16	23	11	20
Q96BD8	SKA1_HUMAN	255	6	38	14	52	44	20
Q96BK5	PINX1_HUMAN	328	3	65	16	81	68	19
Q96BP2	CHCH1_HUMAN	118	4	20	5	25	24	9
Q96BR5	COA7_HUMAN	231	13	27	21	48	39	34
Q96BR9	ZBT8A_HUMAN	441	13	57	31	88	67	42
Q96C55	ZN524_HUMAN	264	10	33	9	42	42	18
Q96CA5	BIRC7_HUMAN	298	13	29	20	49	39	32
Q96CC6	RHDF1_HUMAN	855	28	101	82	183	126	107
Q96CG8	CTHR1_HUMAN	243	10	25	16	41	34	26
Q96CN5	LRC45_HUMAN	670	10	99	15	114	107	24
Q96CS2	HAUS1_HUMAN	278	1	42	14	56	42	15
Q96CV9	OPTN_HUMAN	577	7	85	17	102	90	23
Q96CW9	NTNG2_HUMAN	530	42	57	47	104	90	87
Q96D96	HVCN1_HUMAN	273	2	33	26	59	35	28
Q96DA2	RB39B_HUMAN	213	4	30	22	52	32	26
Q96DE5	APC16_HUMAN	110	1	9	8	17	10	9
Q96DN0	ERP27_HUMAN	273	3	20	23	43	23	25
Q96DN6	MBD6_HUMAN	1003	12	64	22	86	74	34
Q96DT7	ZBT10_HUMAN	871	20	87	51	138	105	67
Q96DX7	TRI44_HUMAN	344	10	29	12	41	38	19
Q96DZ1	ERLEC_HUMAN	483	15	52	39	91	65	51
Q96E93	KLRG1_HUMAN	195	13	11	22	33	23	33
Q96EB6	SIR1_HUMAN	747	19	68	38	106	84	57
Q96EE3	SEH1_HUMAN	360	9	36	29	65	44	38
Q96EK4	THA11_HUMAN	314	6	34	11	45	40	17
Q96EL3	RM53_HUMAN	112	3	13	5	18	16	7
Q96EU7	C1GLC_HUMAN	318	7	33	35	68	39	40
Q96F10	SAT2_HUMAN	170	5	22	20	42	27	24
Q96F85	CNRP1_HUMAN	164	2	18	17	35	20	19
Q96F86	EDC3_HUMAN	508	13	49	32	81	61	44
Q96FA3	PELI1_HUMAN	418	14	41	35	76	55	48
Q96FE7	P3IP1_HUMAN	263	8	20	16	36	26	22
Q96FJ2	DYL2_HUMAN	89	2	12	12	24	14	14
Q96FQ6	S10AG_HUMAN	103	1	13	9	22	14	10
Q96FV3	TSN17_HUMAN	270	12	19	38	57	30	50
Q96FZ2	HMCES_HUMAN	354	10	49	31	80	57	40
Q96FZ5	CKLF7_HUMAN	175	6	8	18	26	14	24
Q96G75	RMD5B_HUMAN	393	17	40	25	65	55	40
Q96GA3	LTV1_HUMAN	475	4	70	31	101	74	35
Q96GD4	AURKB_HUMAN	344	5	46	24	70	51	27
Q96GM8	TOE1_HUMAN	510	15	55	38	93	68	51
Q96GN5	CDA7L_HUMAN	454	16	73	32	105	87	46
Q96GQ5	RUSF1_HUMAN	468	8	41	36	77	48	44
[truncated: 1,001 more rows]

## Sheet: Reagent 1
Peptide_Length	Frequency	<7	>20	7~20	Total	Inappropriate	Appropriate frequency
1	1470	10248	22577	12216	45041	32825	150686
2	1657
3	2477
4	1461
5	1696
6	1487	SUM
7	1313	9191
8	1085	8680
9	1479	13311
10	986	9860
11	1050	11550
12	839	10068
13	976	12688
14	753	10542
15	708	10620
16	688	11008
17	598	10166
18	606	10908
19	606	11514
20	529	10580
21	598
22	529
23	487
24	485
25	689
26	433
27	429
28	451
29	375
30	391
31	352
32	375
33	376
34	325
35	308
36	331
37	340
38	306
39	310
40	272
41	261
42	306
43	296
44	295
45	271
46	257
47	274
48	269
49	321
50	238
51	225
52	257
53	226
54	237
55	214
56	211
57	187
58	206
59	213
60	183
61	181
62	168
63	169
64	161
65	134
66	157
67	179
68	154
69	162
70	141
71	132
72	132
73	141
74	129
75	125
76	127
77	138
78	123
79	122
80	106
81	118
82	123
83	94
84	118
85	101
86	111
87	115
88	118
89	103
90	102
91	85
92	87
93	90
94	98
95	82
96	86
97	84
98	87
99	66
100	99
101	76
102	84
103	68
104	80
105	76
106	71
107	66
108	67
109	74
110	77
111	62
112	75
113	60
114	54
115	60
116	49
117	49
118	46
119	50
120	48
121	47
122	60
123	53
124	50
125	41
126	64
127	39
128	48
129	43
130	37
131	33
132	38
133	30
134	42
135	45
136	57
137	48
138	52
139	31
140	40
141	35
142	40
143	48
144	30
145	32
146	36
147	31
148	29
149	23
150	34
151	33
152	31
153	25
154	22
155	30
156	23
157	21
158	29
159	34
160	29
161	24
162	22
163	23
164	29
165	29
166	17
167	17
168	15
169	25
170	20
171	17
172	14
173	15
174	16
175	14
176	24
177	19
178	14
179	18
180	21
181	16
182	19
183	16
184	11
185	17
186	25
187	14
188	16
189	18
190	17
191	19
192	17
193	22
194	16
195	10
196	11
197	12
198	13
199	10
200	16
201	17
202	10
203	13
204	14
205	10
206	17
207	12
208	17
209	12
210	9
211	8
212	9
213	8
214	10
215	12
216	12
217	10
218	11
219	12
220	9
221	11
222	14
223	7
224	8
225	6
226	3
227	11
228	8
229	12
230	11
231	7
232	16
233	8
234	10
235	10
236	13
237	6
238	5
239	8
240	9
241	6
242	10
243	5
244	6
245	7
246	7
247	8
248	5
249	8
250	4
251	6
252	8
253	2
254	10
255	4
256	1
257	6
258	9
259	11
260	1
261	9
262	4
263	2
264	5
265	5
266	7
267	2
268	4
269	2
270	5
271	5
272	9
273	8
274	4
275	5
276	4
277	5
278	3
279	4
280	3
281	3
282	2
283	5
285	7
286	1
287	2
288	2
289	6
290	2
291	4
292	2
293	10
294	6
295	3
296	5
297	5
298	5
299	6
300	5
301	3
302	10
303	4
304	2
305	4
306	4
307	3
308	4
309	2
310	5
312	1
313	2
314	3
315	1
316	3
317	2
319	4
320	2
321	3
322	2
323	2
324	3
325	1
326	2
327	5
329	3
331	1
333	3
335	3
337	2
338	1
339	2
340	5
341	8
343	1
344	2
345	1
346	3
347	5
349	4
350	2
351	2
352	2
353	2
355	1
356	2
357	1
358	2
359	2
361	4
362	2
363	2
364	7
365	1
366	1
367	4
368	1
369	3
371	1
373	2
374	1
379	4
380	3
381	3
382	1
383	2
384	2
385	2
386	2
387	2
388	1
389	1
391	1
392	2
393	2
394	1
396	2
397	3
398	3
399	1
401	1
402	2
403	2
404	1
405	1
406	2
407	2
411	3
412	3
413	2
414	2
415	1
416	2
417	3
420	1
422	1
423	2
424	2
425	1
426	1
427	1
429	1
430	2
431	2
432	2
433	1
434	2
438	1
440	2
442	2
445	3
446	1
449	1
451	1
454	2
455	1
458	1
459	1
461	1
462	2
465	1
466	1
467	3
468	1
473	1
474	1
477	2
478	2
479	1
480	1
481	1
482	1
486	1
487	2
488	1
490	1
497	1
500	1
504	1
508	2
514	2
516	1
517	1
518	2
519	1
523	2
524	1
532	1
536	3
537	1
543	2
548	1
550	1
556	1
558	1
559	1
562	1
565	1
568	1
569	1
573	1
575	1
578	1
580	1
588	1
589	1
593	1
601	1
605	1
606	2
608	1
609	1
610	1
613	1
618	1
623	2
627	1
628	1
631	2
635	1
652	1
657	2
663	1
664	1
668	1
685	1
689	1
694	1
698	1
701	1
704	1
706	1
707	2
718	1
721	1
728	1
729	2
734	1
763	1
776	1
823	1
825	1
851	1
905	1
914	1
940	1
942	1
992	1
1016	1
1057	1
1124	1
1164	1
1167	1
1200	1
1208	1
1222	1
1320	1
1387	1
1610	1
1735	1
2269	1
2646	1
4328	1
6516	1
7797	1

## Sheet: Trypsin
Peptide_Length	Frequency	<7	>20	7~20	Total	Inappropriate	Appropriate frequency
1	28391	108344	22695	71371	202410	131039	826690
2	21730
3	17988
4	15177
5	13379
6	11679	SUM
7	10340	72380
8	9011	72088
9	7961	71649
10	6647	66470
11	6190	68090
12	5312	63744
13	4706	61178
14	4114	57596
15	3759	56385
16	3286	52576
17	2881	48977
18	2672	48096
19	2379	45201
20	2113	42260
21	1966
22	1727
23	1573
24	1555
25	1342
26	1202
27	1151
28	1067
29	921
30	898
31	782
32	732
33	680
34	590
35	524
36	477
37	427
38	378
39	346
40	324
41	305
42	257
43	225
44	214
45	201
46	184
47	201
48	164
49	139
50	138
51	120
52	131
53	96
54	92
55	98
56	85
57	86
58	74
59	72
60	68
61	67
62	62
63	60
64	64
65	47
66	39
67	37
68	34
69	30
70	36
71	27
72	24
73	35
74	22
75	21
76	15
77	31
78	25
79	13
80	13
81	16
82	24
83	16
84	22
85	17
86	11
87	10
88	11
89	19
90	11
91	7
92	6
93	10
94	7
95	7
96	3
97	11
98	11
99	6
100	6
101	3
102	5
103	2
104	5
105	3
106	3
107	3
108	2
110	4
111	2
112	6
113	1
114	4
115	3
117	4
118	3
119	3
120	3
121	1
122	5
123	2
124	1
125	3
126	1
127	1
128	4
129	5
130	1
132	2
133	3
137	4
138	2
139	2
140	1
141	3
142	1
143	3
144	3
145	1
148	2
149	2
150	1
152	3
156	2
158	1
159	1
162	1
163	1
166	3
172	1
174	1
184	1
193	1
194	1
201	1
202	1
203	1
209	1
211	1
213	1
220	1
235	1
241	1
244	1
247	1
251	1
258	1
267	1
295	1
298	1
316	1
558	1
602	1
929	1

## Sheet: Chymotrypsin
Peptide_Length	Frequency	<7	>20	7~20	Total	Inappropriate	Appropriate frequency
1	12372	55552	27164	54415	137131	82716	653920
2	10035
3	9773
4	9013
5	7538
6	6821	SUM
7	6765	47355
8	6097	48776
9	5537	49833
10	4858	48580
11	4539	49929
12	4289	51468
13	3698	48074
14	3534	49476
15	3219	48285
16	2700	43200
17	2573	43741
18	2298	41364
19	2321	44099
20	1987	39740
21	1783
22	1670
23	1541
24	1484
25	1318
26	1143
27	1151
28	1032
29	982
30	979
31	876
32	808
33	713
34	700
35	620
36	591
37	505
38	484
39	473
40	445
41	391
42	370
43	376
44	341
45	297
46	297
47	245
48	261
49	232
50	233
51	227
52	193
53	185
54	181
55	172
56	141
57	159
58	150
59	141
60	150
61	124
62	124
63	124
64	104
65	91
66	83
67	98
68	84
69	96
70	78
71	93
72	76
73	71
74	76
75	59
76	48
77	47
78	56
79	59
80	38
81	52
82	44
83	59
84	44
85	40
86	33
87	26
88	41
89	43
90	37
91	28
92	36
93	15
94	29
95	25
96	25
97	21
98	20
99	19
100	25
101	22
102	19
103	27
104	17
105	24
106	13
107	24
108	16
109	17
110	22
111	18
112	15
113	21
114	18
115	13
116	17
117	10
118	16
119	9
120	17
121	6
122	14
123	16
124	14
125	10
126	10
127	8
128	10
129	12
130	6
131	6
132	8
133	15
134	5
135	3
136	15
137	5
138	5
139	5
140	4
141	10
142	5
143	8
144	4
145	2
146	15
147	6
148	6
149	4
150	7
151	1
152	3
153	5
154	4
155	6
156	4
157	4
159	5
160	5
161	3
162	1
163	2
164	2
165	2
166	4
167	6
168	3
169	1
170	1
171	7
172	2
173	4
176	1
177	9
178	4
179	2
180	5
181	4
182	3
183	5
184	2
185	1
186	2
187	2
188	4
189	5
190	1
192	3
193	2
194	1
195	3
196	1
197	4
199	1
200	2
201	3
202	2
203	1
204	1
205	1
206	4
207	2
208	3
209	1
210	1
211	1
213	2
214	1
216	6
217	2
219	2
221	1
222	1
223	1
224	1
227	1
229	1
230	3
231	1
232	1
233	1
234	1
236	2
237	1
240	3
241	1
242	2
245	1
248	1
250	1
254	1
257	1
258	1
264	1
268	1
272	1
285	1
286	1
288	2
295	2
300	2
303	1
314	1
343	1
359	1
361	1
366	1
372	2
375	1
408	1
413	1
420	2
433	1
531	1
600	1
660	1
898	1
1020	1
1342	1

## Sheet: Trypsin+Chymo
Peptide_Length	Frequency	<7	>20	7~20	Total	Inappropriate	Appropriate frequency
1	69726	238678	9590	88273	336541	248268	943399
2	51700
3	39513
4	31197
5	25568
6	20974	SUM
7	17054	119378
8	13913	111304
9	11068	99612
10	9081	90810
11	7539	82929
12	6323	75876
13	4954	64402
14	4162	58268
15	3630	54450
16	2879	46064
17	2464	41888
18	2024	36432
19	1654	31426
20	1528	30560
21	1279
22	1087
23	868
24	774
25	710
26	561
27	518
28	430
29	377
30	348
31	276
32	254
33	210
34	191
35	154
36	149
37	141
38	123
39	86
40	91
41	72
42	62
43	65
44	61
45	43
46	40
47	55
48	37
49	30
50	39
51	23
52	33
53	28
54	20
55	18
56	16
57	28
58	11
59	14
60	13
61	13
62	14
63	9
64	16
65	5
66	9
67	9
68	11
69	10
70	5
71	5
72	6
73	5
74	4
75	6
76	2
77	5
78	9
79	3
80	1
81	5
82	3
83	6
84	9
85	1
86	4
87	4
88	3
89	4
90	2
91	2
92	2
93	2
94	4
95	2
96	1
97	2
98	1
99	1
100	5
102	1
104	5
105	3
107	1
110	2
113	1
114	1
115	1
118	2
119	1
121	2
123	1
124	3
128	2
132	2
133	1
134	1
139	1
147	1
152	1
167	1
173	1
177	1
184	1
197	1
200	2
220	1
258	1
298	1
602	1
886	1

## Sheet: Trypsin+Reagent 1
Peptide_Length	Frequency	<7	>20	7~20	Total	Inappropriate	Appropriate frequency
1	33356	141116	17629	81324	240069	158745	918072
2	30247
3	25157
4	20105
5	17363
6	14888	SUM
7	12874	90118
8	10924	87392
9	9834	88506
10	7895	78950
11	7034	77374
12	5952	71424
13	5148	66924
14	4423	61922
15	3873	58095
16	3397	54352
17	2895	49215
18	2700	48600
19	2300	43700
20	2075	41500
21	1798
22	1604
23	1382
24	1341
25	1119
26	1031
27	900
28	841
29	724
30	663
31	551
32	513
33	509
34	425
35	377
36	319
37	300
38	288
39	262
40	210
41	204
42	176
43	162
44	138
45	124
46	107
47	124
48	101
49	80
50	81
51	82
52	80
53	63
54	48
55	48
56	48
57	60
58	42
59	44
60	28
61	43
62	39
63	25
64	38
65	27
66	21
67	21
68	17
69	17
70	18
71	21
72	14
73	11
74	10
75	18
76	9
77	15
78	15
79	8
80	7
81	9
82	16
83	10
84	15
85	8
86	8
87	6
88	8
89	8
90	11
91	6
92	3
93	3
94	6
95	3
96	1
97	6
98	5
99	6
100	5
102	3
104	3
105	1
106	1
107	1
109	1
110	4
111	2
112	4
114	1
115	2
117	3
118	3
119	3
120	2
122	5
123	1
124	1
128	2
129	3
130	1
131	1
132	1
133	1
137	2
138	1
139	1
140	1
142	1
143	4
144	1
145	1
148	1
149	2
152	3
156	1
158	1
159	1
166	1
170	1
171	1
172	1
174	1
184	1
189	1
193	1
194	1
201	1
203	1
213	1
220	1
235	1
237	1
247	1
251	1
258	1
267	1
286	1
309	1
558	1
602	1
929	1

## Sheet: Chymo+Reagent 1
Peptide_Length	Frequency	<7	>20	7~20	Total	Inappropriate	Appropriate frequency
1	17217	86361	23256	66025	175642	109617	770750
2	16772
3	16074
4	13629
5	12430
6	10239	SUM
7	9413	65891
8	8272	66176
9	6917	62253
10	6187	61870
11	5504	60544
12	4968	59616
13	4469	58097
14	4044	56616
15	3526	52890
16	3008	48128
17	2766	47022
18	2467	44406
19	2439	46341
20	2045	40900
21	1846
22	1651
23	1514
24	1453
25	1290
26	1093
27	1082
28	925
29	809
30	825
31	743
32	680
33	621
34	579
35	503
36	472
37	417
38	411
39	399
40	364
41	313
42	297
43	272
44	270
45	229
46	236
47	203
48	205
49	183
50	170
51	165
52	155
53	132
54	121
55	128
56	107
57	100
58	86
59	99
60	96
61	80
62	79
63	70
64	58
65	68
66	58
67	67
68	65
69	65
70	42
71	60
72	57
73	46
74	42
75	50
76	37
77	37
78	41
79	35
80	28
81	38
82	29
83	40
84	37
85	20
86	27
87	14
88	20
89	36
90	21
91	20
92	25
93	5
94	20
95	14
96	13
97	15
98	18
99	15
100	18
101	11
102	15
103	16
104	13
105	16
106	7
107	12
108	10
109	10
110	13
111	11
112	12
113	13
114	4
115	7
116	9
117	9
118	8
119	5
120	6
121	5
122	7
123	8
124	5
125	7
126	8
127	3
128	5
129	15
130	2
131	2
132	7
133	9
134	3
135	1
136	3
137	2
138	5
139	5
140	1
141	4
142	2
144	3
145	4
146	6
147	5
148	5
149	2
150	2
153	3
154	2
155	3
156	2
157	3
158	2
159	3
160	2
163	1
164	1
165	2
166	1
167	2
168	2
169	1
170	1
171	3
173	2
174	1
175	1
176	1
177	4
178	4
179	1
180	1
181	3
182	2
183	3
184	1
186	1
187	1
189	3
190	2
191	1
192	2
193	1
195	5
196	1
197	1
198	3
200	2
201	4
204	1
206	2
207	2
208	2
209	1
211	2
213	1
214	1
216	4
217	1
219	1
220	1
222	2
223	1
230	1
233	1
234	1
236	1
240	1
242	2
248	1
250	1
254	1
264	1
268	1
286	1
288	1
300	2
314	1
318	1
335	1
359	2
361	1
370	1
372	1
397	1
420	1
531	1
600	1
660	1
898	1
1020	1
1342	1
