# Supplementary material for: Protein digestion using a cysteine-specific backbone cleavage reagent
Source: Royal Society of Chemistry journal article supplement (doi:10.1039/d6cb00152a), 2026-05-28
Supplement: d6cb00152a6.xlsx [file d6cb00152a6.xlsx]

## Sheet: Protein_Summary
Entry_PDB	Entry_Name	Total_AA	a. Reagent 1_Sites	Reagent 1 sites ratio (%)	b. Trypsin_Sites	Trypsin sites ratio (%)	c. Chymotrypsin_Sites	Chymotrypsin sites ratio (%)	d. Trypsin + Chymo_Sites	Trypsin + Chymo sites ratio (%)	e. Trypsin + Reagent 1_Sites	Trypsin + Reagent 1 sites ratio (%)	f. Chymo + Reagent 1_Sites	Chymo + Reagent 1 sites ratio (%)
Q9BYR4	KRA43_HUMAN	195	71	36.4103	5	2.5641	3	1.53846	8	4.10256	75	38.4615	74	37.9487
P07438	MT1B_HUMAN	61	21	34.4262	9	14.7541	0	0	9	14.7541	24	39.3443	21	34.4262
Q9BYQ7	KRA41_HUMAN	146	49	33.5616	1	0.684932	0	0	1	0.684932	50	34.2466	49	33.5616
P04731	MT1A_HUMAN	61	20	32.7869	8	13.1148	0	0	8	13.1148	24	39.3443	20	32.7869
P60370	KR105_HUMAN	271	74	27.3063	2	0.738007	3	1.10701	5	1.84502	76	28.0443	77	28.4133
P60368	KR102_HUMAN	255	69	27.0588	4	1.56863	2	0.784314	6	2.35294	73	28.6275	71	27.8431
P60412	KR10B_HUMAN	298	77	25.8389	9	3.02013	5	1.67785	14	4.69799	85	28.5235	81	27.1812
Q3LI59	KR212_HUMAN	83	18	21.6867	4	4.81928	17	20.4819	21	25.3012	21	25.3012	35	42.1687
Q5T7P3	LCE1B_HUMAN	118	24	20.339	10	8.47458	0	0	10	8.47458	28	23.7288	24	20.339
Q5TCM9	LCE5A_HUMAN	118	24	20.339	9	7.62712	0	0	9	7.62712	27	22.8814	24	20.339
Q5T753	LCE1E_HUMAN	118	23	19.4915	9	7.62712	0	0	9	7.62712	26	22.0339	23	19.4915
Q5T752	LCE1D_HUMAN	114	22	19.2982	10	8.77193	0	0	10	8.77193	27	23.6842	22	19.2982
P49901	MCSP_HUMAN	116	20	17.2414	10	8.62069	0	0	10	8.62069	28	24.1379	20	17.2414
Q5TA76	LCE3A_HUMAN	89	15	16.8539	9	10.1124	0	0	9	10.1124	20	22.4719	15	16.8539
P35326	SPR2A_HUMAN	72	11	15.2778	8	11.1111	1	1.38889	9	12.5	16	22.2222	12	16.6667
Q9NYG5	APC11_HUMAN	84	12	14.2857	9	10.7143	9	10.7143	18	21.4286	20	23.8095	21	25
A6BM72	MEG11_HUMAN	1044	146	13.9847	59	5.65134	75	7.18391	134	12.8352	192	18.3908	217	20.7854
Q7Z3S9	NT2NA_HUMAN	236	33	13.9831	16	6.77966	20	8.47458	36	15.2542	44	18.6441	50	21.1864
P0DPK4	NT2NC_HUMAN	293	40	13.6519	21	7.16724	23	7.84983	44	15.0171	55	18.7713	60	20.4778
Q3LI64	KRA61_HUMAN	71	9	12.6761	3	4.22535	18	25.3521	21	29.5775	12	16.9014	26	36.6197
P35555	FBN1_HUMAN	2871	361	12.574	225	7.83699	185	6.44375	410	14.2807	537	18.7043	535	18.6346
P35556	FBN2_HUMAN	2912	363	12.4657	209	7.1772	194	6.66209	403	13.8393	527	18.0975	548	18.8187
B2RUY7	VWC2L_HUMAN	222	27	12.1622	17	7.65766	14	6.30631	31	13.964	42	18.9189	39	17.5676
A8MQ03	CRTP1_HUMAN	144	17	11.8056	7	4.86111	5	3.47222	12	8.33333	23	15.9722	21	14.5833
Q03403	TFF2_HUMAN	129	15	11.6279	10	7.75194	10	7.75194	20	15.5039	24	18.6047	23	17.8295
Q3LI76	KR151_HUMAN	137	15	10.9489	6	4.37956	19	13.8686	25	18.2482	21	15.3285	31	22.6277
Q7Z419	R144B_HUMAN	303	33	10.8911	30	9.90099	18	5.94059	48	15.8416	63	20.7921	46	15.1815
Q8N104	D106A_HUMAN	65	7	10.7692	10	15.3846	7	10.7692	17	26.1538	15	23.0769	14	21.5385
P78504	JAG1_HUMAN	1218	131	10.7553	107	8.78489	86	7.06076	193	15.8456	225	18.4729	206	16.913
P55000	SLUR1_HUMAN	103	11	10.6796	7	6.79612	6	5.82524	13	12.6214	16	15.534	16	15.534
Q99466	NOTC4_HUMAN	2003	209	10.4343	116	5.79131	90	4.49326	206	10.2846	308	15.3769	290	14.4783
P01185	NEU2_HUMAN	164	17	10.3659	15	9.14634	11	6.70732	26	15.8537	29	17.6829	28	17.0732
P60022	DEFB1_HUMAN	68	7	10.2941	7	10.2941	7	10.2941	14	20.5882	13	19.1176	14	20.5882
O00622	CCN1_HUMAN	381	38	9.97375	49	12.8609	21	5.51181	70	18.3727	81	21.2598	58	15.2231
P04155	TFF1_HUMAN	84	8	9.52381	5	5.95238	4	4.7619	9	10.7143	13	15.4762	11	13.0952
O15263	DFB4A_HUMAN	64	6	9.375	7	10.9375	8	12.5	15	23.4375	12	18.75	13	20.3125
Q5T749	KPRP_HUMAN	579	54	9.32642	46	7.94473	32	5.52677	78	13.4715	94	16.2349	82	14.1623
Q9Y2Y1	RPC10_HUMAN	108	10	9.25926	14	12.963	9	8.33333	23	21.2963	21	19.4444	18	16.6667
Q9UBX5	FBLN5_HUMAN	448	41	9.15179	29	6.47321	37	8.25893	66	14.7321	66	14.7321	76	16.9643
Q8IWY4	SCUB1_HUMAN	988	90	9.10931	98	9.91903	65	6.57895	163	16.498	179	18.1174	154	15.587
P61968	LMO4_HUMAN	165	15	9.09091	15	9.09091	13	7.87879	28	16.9697	26	15.7576	27	16.3636
P49767	VEGFC_HUMAN	419	38	9.06921	44	10.5012	31	7.39857	75	17.8998	75	17.8998	69	16.4678
Q9Y3S2	ZN330_HUMAN	320	29	9.0625	46	14.375	25	7.8125	71	22.1875	69	21.5625	49	15.3125
P35321	SPR1A_HUMAN	89	8	8.98876	11	12.3596	0	0	11	12.3596	19	21.3483	8	8.98876
P81534	D103A_HUMAN	67	6	8.95522	14	20.8955	6	8.95522	20	29.8507	17	25.3731	11	16.4179
Q2TAL6	VWC2_HUMAN	325	29	8.92308	34	10.4615	16	4.92308	50	15.3846	60	18.4615	44	13.5385
Q8NFT8	DNER_HUMAN	737	65	8.81954	41	5.56309	47	6.3772	88	11.9403	104	14.1113	108	14.654
Q03405	UPAR_HUMAN	335	29	8.65672	29	8.65672	17	5.07463	46	13.7313	55	16.4179	46	13.7313
P0DP58	LYNX1_HUMAN	116	10	8.62069	7	6.03448	10	8.62069	17	14.6552	15	12.931	19	16.3793
Q9UBU2	DKK2_HUMAN	259	22	8.49421	38	14.6718	11	4.2471	49	18.9189	57	22.0077	31	11.9691
Q5IJ48	CRUM2_HUMAN	1285	109	8.48249	73	5.68093	70	5.44747	143	11.1284	168	13.0739	175	13.6187
Q8IYR6	TEFF1_HUMAN	380	32	8.42105	40	10.5263	24	6.31579	64	16.8421	67	17.6316	54	14.2105
P04275	VWF_HUMAN	2813	234	8.31852	240	8.53182	184	6.54106	424	15.0729	458	16.2815	407	14.4685
P50461	CSRP3_HUMAN	194	16	8.24742	25	12.8866	18	9.27835	43	22.1649	37	19.0722	32	16.4948
O43609	SPY1_HUMAN	319	26	8.15047	35	10.9718	13	4.07524	48	15.047	57	17.8683	38	11.9122
Q92956	TNR14_HUMAN	283	23	8.12721	25	8.83392	16	5.65371	41	14.4876	45	15.9011	38	13.4276
Q9BXY4	RSPO3_HUMAN	272	22	8.08824	51	18.75	16	5.88235	67	24.6324	67	24.6324	37	13.6029
P62952	BLCAP_HUMAN	87	7	8.04598	1	1.14943	14	16.092	15	17.2414	8	9.1954	20	22.9885
Q9P1U0	RPA12_HUMAN	126	10	7.93651	11	8.73016	9	7.14286	20	15.873	18	14.2857	18	14.2857
Q9NXI6	RN186_HUMAN	227	18	7.92952	15	6.60793	8	3.52423	23	10.1322	33	14.5374	23	10.1322
Q96CW9	NTNG2_HUMAN	530	42	7.92453	57	10.7547	47	8.86792	104	19.6226	90	16.9811	87	16.4151
Q8WWQ8	STAB2_HUMAN	2551	202	7.91846	221	8.66327	179	7.01686	400	15.6801	394	15.4449	373	14.6217
Q93038	TNR25_HUMAN	417	33	7.91367	33	7.91367	26	6.23501	59	14.1487	62	14.8681	57	13.6691
O43866	CD5L_HUMAN	347	27	7.78098	34	9.79827	23	6.62824	57	16.4265	57	16.4265	50	14.4092
P98155	VLDLR_HUMAN	873	67	7.67468	79	9.04926	57	6.52921	136	15.5785	136	15.5785	123	14.0893
Q6WN34	CRDL2_HUMAN	429	32	7.45921	47	10.9557	25	5.82751	72	16.7832	75	17.4825	54	12.5874
Q9BU40	CRDL1_HUMAN	456	34	7.45614	60	13.1579	36	7.89474	96	21.0526	91	19.9561	66	14.4737
Q9Y508	RN114_HUMAN	228	17	7.45614	24	10.5263	18	7.89474	42	18.4211	41	17.9825	33	14.4737
Q9Y2I2	NTNG1_HUMAN	539	40	7.42115	44	8.16327	51	9.46197	95	17.6252	76	14.1002	88	16.3265
Q9H741	SPRNG_HUMAN	205	15	7.31707	22	10.7317	19	9.26829	41	20	36	17.561	31	15.122
Q6GPH4	XAF1_HUMAN	301	22	7.30897	41	13.6213	16	5.31561	57	18.9369	60	19.9336	33	10.9635
Q9NYP9	MS18A_HUMAN	233	17	7.29614	29	12.4464	12	5.15021	41	17.5966	42	18.0258	28	12.0172
P18084	ITB5_HUMAN	799	58	7.25907	75	9.38673	58	7.25907	133	16.6458	126	15.7697	114	14.2678
Q8WUP2	FBLI1_HUMAN	373	27	7.23861	33	8.84718	21	5.63003	54	14.4772	56	15.0134	45	12.0643
P43489	TNR4_HUMAN	277	20	7.22022	20	7.22022	8	2.88809	28	10.1083	37	13.3574	27	9.74729
A6ND01	JUNO_HUMAN	250	18	7.2	21	8.4	31	12.4	52	20.8	37	14.8	49	19.6
P07942	LAMB1_HUMAN	1786	127	7.11086	162	9.07055	120	6.71892	282	15.7895	272	15.2296	240	13.4378
P05106	ITB3_HUMAN	788	56	7.1066	75	9.51777	54	6.85279	129	16.3706	126	15.9898	106	13.4518
Q5T1H1	EYS_HUMAN	3165	223	7.04581	228	7.20379	277	8.75197	505	15.9558	437	13.8073	475	15.0079
Q6ZRI0	OTOG_HUMAN	2925	206	7.04274	200	6.83761	176	6.01709	376	12.8547	392	13.4017	372	12.7179
O14905	WNT9B_HUMAN	357	25	7.0028	46	12.8852	25	7.0028	71	19.888	69	19.3277	48	13.4454
P13489	RINI_HUMAN	461	32	6.94143	38	8.24295	13	2.81996	51	11.0629	69	14.9675	44	9.54447
Q96NZ8	WFKN1_HUMAN	548	38	6.93431	45	8.21168	28	5.10949	73	13.3212	79	14.4161	66	12.0438
O00468	AGRIN_HUMAN	2068	143	6.91489	180	8.70406	94	4.54545	274	13.2495	313	15.1354	235	11.3636
Q8N6D2	RN182_HUMAN	247	17	6.88259	18	7.28745	20	8.09717	38	15.3846	33	13.3603	35	14.17
Q7Z7M0	MEGF8_HUMAN	2845	195	6.85413	209	7.34622	210	7.38137	419	14.7276	383	13.4622	388	13.638
P13671	CO6_HUMAN	934	64	6.85225	110	11.7773	79	8.45824	189	20.2355	163	17.4518	140	14.9893
Q9ULM2	ZN490_HUMAN	529	36	6.80529	75	14.1777	47	8.88469	122	23.0624	108	20.4159	83	15.69
O75443	TECTA_HUMAN	2155	146	6.77494	170	7.88863	236	10.9513	406	18.8399	303	14.0603	367	17.0302
P20851	C4BPB_HUMAN	252	17	6.74603	22	8.73016	24	9.52381	46	18.254	39	15.4762	38	15.0794
O00451	GFRA2_HUMAN	464	31	6.68103	50	10.7759	33	7.11207	83	17.8879	78	16.8103	61	13.1466
P09544	WNT2_HUMAN	360	24	6.66667	50	13.8889	33	9.16667	83	23.0556	71	19.7222	55	15.2778
Q96E93	KLRG1_HUMAN	195	13	6.66667	11	5.64103	22	11.2821	33	16.9231	23	11.7949	33	16.9231
Q14246	AGRE1_HUMAN	886	59	6.65914	65	7.33634	82	9.25508	147	16.5914	120	13.544	137	15.4628
Q14520	HABP2_HUMAN	560	37	6.60714	52	9.28571	52	9.28571	104	18.5714	87	15.5357	84	15
P19438	TNR1A_HUMAN	455	30	6.59341	45	9.89011	31	6.81319	76	16.7033	72	15.8242	61	13.4066
O14904	WNT9A_HUMAN	365	24	6.57534	52	14.2466	27	7.39726	79	21.6438	73	20	49	13.4247
Q9H2H0	CXXC4_HUMAN	198	13	6.56566	24	12.1212	8	4.0404	32	16.1616	34	17.1717	21	10.6061
Q9UIE0	ZN230_HUMAN	474	31	6.54008	63	13.2911	41	8.64979	104	21.9409	85	17.9325	69	14.557
Q7Z3I7	ZN572_HUMAN	529	34	6.42722	58	10.9641	47	8.88469	105	19.8488	81	15.3119	79	14.9338
O00744	WN10B_HUMAN	389	25	6.42674	53	13.6247	23	5.9126	76	19.5373	75	19.2802	46	11.8252
O95415	BRI3_HUMAN	125	8	6.4	8	6.4	12	9.6	20	16	15	12	20	16
P59666	DEF3_HUMAN	94	6	6.38298	9	9.57447	6	6.38298	15	15.9574	15	15.9574	10	10.6383
Q16270	IBP7_HUMAN	282	18	6.38298	30	10.6383	7	2.48227	37	13.1206	48	17.0213	24	8.51064
Q8IUQ4	SIAH1_HUMAN	282	18	6.38298	20	7.0922	20	7.0922	40	14.1844	37	13.1206	38	13.4752
Q9UKJ8	ADA21_HUMAN	722	46	6.37119	59	8.17175	68	9.41828	127	17.59	100	13.8504	107	14.8199
O14628	ZN195_HUMAN	629	40	6.3593	76	12.0827	60	9.53895	136	21.6216	102	16.2162	100	15.8983
Q8TE60	ATS18_HUMAN	1221	77	6.30631	129	10.5651	104	8.51761	233	19.0827	201	16.4619	172	14.0868
P25445	TNR6_HUMAN	335	21	6.26866	46	13.7313	13	3.8806	59	17.6119	61	18.209	32	9.55224
P10646	TFPI1_HUMAN	304	19	6.25	42	13.8158	34	11.1842	76	25	60	19.7368	50	16.4474
O00300	TR11B_HUMAN	401	25	6.23441	52	12.9676	32	7.98005	84	20.9476	74	18.4539	55	13.7157
Q6ZNH5	ZN497_HUMAN	498	31	6.2249	59	11.8474	31	6.2249	90	18.0723	87	17.4699	62	12.4498
Q8NDP4	ZN439_HUMAN	499	31	6.21242	83	16.6333	53	10.6212	136	27.2545	111	22.2445	83	16.6333
Q70EL3	UBP50_HUMAN	339	21	6.19469	33	9.73451	39	11.5044	72	21.2389	51	15.0442	58	17.1091
P32320	CDD_HUMAN	146	9	6.16438	12	8.21918	10	6.84932	22	15.0685	21	14.3836	18	12.3288
O75882	ATRN_HUMAN	1429	88	6.15815	123	8.60742	138	9.6571	261	18.2645	200	13.9958	217	15.1854
Q8N8R7	AL14E_HUMAN	260	16	6.15385	37	14.2308	18	6.92308	55	21.1538	50	19.2308	34	13.0769
Q9H0X6	RN208_HUMAN	261	16	6.13027	19	7.27969	11	4.21456	30	11.4943	35	13.41	26	9.96169
Q96NL3	ZN599_HUMAN	588	36	6.12245	73	12.415	52	8.84354	125	21.2585	108	18.3673	85	14.4558
Q02747	GUC2A_HUMAN	115	7	6.08696	8	6.95652	6	5.21739	14	12.1739	15	13.0435	13	11.3043
Q13491	GPM6B_HUMAN	265	16	6.03774	13	4.90566	35	13.2075	48	18.1132	27	10.1887	50	18.8679
Q9UBP4	DKK3_HUMAN	350	21	6	24	6.85714	14	4	38	10.8571	44	12.5714	34	9.71429
Q6ECI4	ZN470_HUMAN	717	43	5.99721	91	12.6918	54	7.53138	145	20.2232	130	18.1311	97	13.5286
Q8TE57	ATS16_HUMAN	1224	73	5.96405	137	11.1928	100	8.16993	237	19.3627	205	16.7484	162	13.2353
Q04756	HGFA_HUMAN	655	39	5.9542	53	8.0916	53	8.0916	106	16.1832	87	13.2824	85	12.9771
O15230	LAMA5_HUMAN	3695	220	5.95399	308	8.33559	224	6.06225	532	14.3978	491	13.2882	434	11.7456
Q9ULY5	CLC4E_HUMAN	219	13	5.93607	17	7.76256	30	13.6986	47	21.4612	29	13.242	43	19.6347
P48509	CD151_HUMAN	253	15	5.92885	22	8.69565	27	10.6719	49	19.3676	37	14.6245	42	16.6008
Q7L2R6	ZN765_HUMAN	523	31	5.92734	75	14.3403	53	10.1338	128	24.4742	93	17.782	83	15.87
Q86UD4	ZN329_HUMAN	541	32	5.91497	69	12.7542	38	7.02403	107	19.7782	95	17.5601	70	12.939
P02774	VTDB_HUMAN	474	28	5.90717	56	11.8143	33	6.96203	89	18.7764	83	17.5105	60	12.6582
Q68G74	LHX8_HUMAN	356	21	5.89888	41	11.5169	20	5.61798	61	17.1348	57	16.0112	40	11.236
Q92563	TICN2_HUMAN	424	25	5.89623	42	9.90566	31	7.31132	73	17.217	65	15.3302	53	12.5
Q6ZMP0	THSD4_HUMAN	1018	60	5.89391	99	9.72495	72	7.07269	171	16.7976	152	14.9312	131	12.8684
P0DPQ6	DT3UO_HUMAN	34	2	5.88235	7	20.5882	3	8.82353	10	29.4118	8	23.5294	5	14.7059
P48960	AGRE5_HUMAN	835	49	5.86826	66	7.90419	75	8.98204	141	16.8862	111	13.2934	118	14.1317
O43294	TGFI1_HUMAN	461	27	5.85683	35	7.59219	36	7.80911	71	15.4013	59	12.7983	57	12.3644
Q6UW88	EPGN_HUMAN	154	9	5.84416	12	7.79221	16	10.3896	28	18.1818	18	11.6883	23	14.9351
Q9H2U9	ADAM7_HUMAN	754	44	5.83554	80	10.6101	63	8.35544	143	18.9655	117	15.5172	103	13.6605
Q8N114	SHSA5_HUMAN	240	14	5.83333	10	4.16667	15	6.25	25	10.4167	23	9.58333	27	11.25
Q9UKP5	ATS6_HUMAN	1117	65	5.81916	108	9.66876	100	8.95255	208	18.6213	167	14.9508	158	14.145
Q6UXN8	CLC9A_HUMAN	241	14	5.80913	20	8.29876	25	10.3734	45	18.6722	32	13.278	37	15.3527
Q13751	LAMB3_HUMAN	1172	68	5.80205	124	10.5802	61	5.20478	185	15.785	178	15.1877	126	10.7509
Q9H1E1	RNAS7_HUMAN	156	9	5.76923	21	13.4615	9	5.76923	30	19.2308	29	18.5897	17	10.8974
O15232	MATN3_HUMAN	486	28	5.76132	48	9.87654	25	5.14403	73	15.0206	73	15.0206	52	10.6996
P03951	FA11_HUMAN	625	36	5.76	67	10.72	57	9.12	124	19.84	99	15.84	91	14.56
P36941	TNR3_HUMAN	435	25	5.74713	27	6.2069	23	5.28736	50	11.4943	47	10.8046	47	10.8046
Q8IXL7	MSRB3_HUMAN	192	11	5.72917	18	9.375	14	7.29167	32	16.6667	28	14.5833	24	12.5
Q8IYI8	ZN440_HUMAN	595	34	5.71429	94	15.7983	55	9.2437	149	25.042	124	20.8403	86	14.4538
O15162	PLS1_HUMAN	318	18	5.66038	18	5.66038	24	7.54717	42	13.2075	35	11.0063	42	13.2075
Q16667	CDKN3_HUMAN	212	12	5.66038	22	10.3774	14	6.60377	36	16.9811	34	16.0377	25	11.7925
Q9H293	IL25_HUMAN	177	10	5.64972	19	10.7345	12	6.77966	31	17.5141	28	15.8192	21	11.8644
Q96BR5	COA7_HUMAN	231	13	5.62771	27	11.6883	21	9.09091	48	20.7792	39	16.8831	34	14.7186
P10153	RNAS2_HUMAN	161	9	5.59006	12	7.45342	11	6.8323	23	14.2857	20	12.4224	20	12.4224
Q9P0T4	ZN581_HUMAN	197	11	5.58376	21	10.6599	13	6.59898	34	17.2589	31	15.736	24	12.1827
Q8IXA5	SACA3_HUMAN	215	12	5.5814	20	9.30233	18	8.37209	38	17.6744	31	14.4186	27	12.5581
P41968	MC3R_HUMAN	323	18	5.57276	13	4.02477	36	11.1455	49	15.1703	31	9.59752	51	15.7895
Q3KNS6	ZN829_HUMAN	432	24	5.55556	53	12.2685	37	8.56481	90	20.8333	77	17.8241	59	13.6574
Q3LI72	KR195_HUMAN	72	4	5.55556	3	4.16667	22	30.5556	25	34.7222	7	9.72222	26	36.1111
Q92784	DPF3_HUMAN	378	21	5.55556	49	12.963	24	6.34921	73	19.3122	69	18.254	41	10.8466
Q9UKQ2	ADA28_HUMAN	775	43	5.54839	88	11.3548	60	7.74194	148	19.0968	127	16.3871	101	13.0323
Q8TCQ1	MARH1_HUMAN	289	16	5.53633	34	11.7647	20	6.92042	54	18.6851	48	16.609	34	11.7647
Q16342	PDCD2_HUMAN	344	19	5.52326	32	9.30233	29	8.43023	61	17.7326	49	14.2442	46	13.3721
Q9NXF8	ZDHC7_HUMAN	308	17	5.51948	29	9.41558	35	11.3636	64	20.7792	43	13.961	52	16.8831
Q9BT23	LIMD2_HUMAN	127	7	5.51181	17	13.3858	12	9.44882	29	22.8346	24	18.8976	17	13.3858
O00501	CLD5_HUMAN	218	12	5.50459	11	5.04587	21	9.63303	32	14.6789	23	10.5505	32	14.6789
Q9BTE1	DCTN5_HUMAN	182	10	5.49451	19	10.4396	13	7.14286	32	17.5824	28	15.3846	23	12.6374
O95274	LYPD3_HUMAN	346	19	5.49133	28	8.09249	13	3.75723	41	11.8497	44	12.7168	31	8.95954
Q8IWS0	PHF6_HUMAN	365	20	5.47945	60	16.4384	21	5.75342	81	22.1918	75	20.5479	37	10.137
Q15654	TRIP6_HUMAN	476	26	5.46218	42	8.82353	26	5.46218	68	14.2857	65	13.6555	50	10.5042
P58397	ATS12_HUMAN	1594	87	5.45797	167	10.4768	114	7.15182	281	17.6286	246	15.4329	190	11.9197
P01308	INS_HUMAN	110	6	5.45455	7	6.36364	9	8.18182	16	14.5455	13	11.8182	14	12.7273
Q9UK23	NAGPA_HUMAN	515	28	5.43689	49	9.51456	32	6.21359	81	15.7282	73	14.1748	60	11.6505
O75077	ADA23_HUMAN	832	45	5.40865	85	10.2163	63	7.57212	148	17.7885	125	15.024	105	12.6202
P55259	GP2_HUMAN	537	29	5.40037	39	7.26257	41	7.63501	80	14.8976	65	12.1043	67	12.4767
P21128	ENDOU_HUMAN	410	22	5.36585	38	9.26829	49	11.9512	87	21.2195	55	13.4146	71	17.3171
Q5T4F7	SFRP5_HUMAN	317	17	5.36278	38	11.9874	23	7.25552	61	19.2429	53	16.7192	40	12.6183
Q9H7X3	ZN696_HUMAN	374	20	5.34759	46	12.2995	23	6.14973	69	18.4492	64	17.1123	43	11.4973
P08519	APOA_HUMAN	2040	109	5.34314	129	6.32353	185	9.06863	314	15.3922	234	11.4706	245	12.0098
O14625	CXL11_HUMAN	94	5	5.31915	18	19.1489	2	2.12766	20	21.2766	21	22.3404	7	7.44681
Q9H4F8	SMOC1_HUMAN	434	23	5.29954	53	12.212	25	5.76037	78	17.9724	71	16.3594	43	9.90783
Q9HBF4	ZFYV1_HUMAN	777	41	5.27671	91	11.7117	56	7.20721	147	18.9189	127	16.3449	94	12.0978
O43715	TRIA1_HUMAN	76	4	5.26316	11	14.4737	8	10.5263	19	25	15	19.7368	12	15.7895
Q6GMV2	SMYD5_HUMAN	418	22	5.26316	39	9.33014	31	7.41627	70	16.7464	60	14.3541	50	11.9617
P02771	FETA_HUMAN	609	32	5.25452	59	9.68801	51	8.37438	110	18.0624	89	14.6141	83	13.6289
Q9UKR0	KLK12_HUMAN	248	13	5.24194	16	6.45161	16	6.45161	32	12.9032	28	11.2903	29	11.6935
Q86Y25	Z354C_HUMAN	554	29	5.23466	71	12.8159	57	10.2888	128	23.1047	93	16.787	86	15.5235
Q16568	CART_HUMAN	116	6	5.17241	18	15.5172	4	3.44828	22	18.9655	23	19.8276	10	8.62069
P07998	RNAS1_HUMAN	156	8	5.12821	19	12.1795	9	5.76923	28	17.9487	26	16.6667	16	10.2564
Q8N474	SFRP1_HUMAN	314	16	5.09554	43	13.6943	24	7.64331	67	21.3376	58	18.4713	40	12.7389
P60033	CD81_HUMAN	236	12	5.08475	13	5.50847	27	11.4407	40	16.9492	24	10.1695	39	16.5254
P24666	PPAC_HUMAN	158	8	5.06329	20	12.6582	14	8.86076	34	21.519	27	17.0886	22	13.9241
Q96SA4	SERC2_HUMAN	455	23	5.05495	22	4.83516	65	14.2857	87	19.1209	44	9.67033	86	18.9011
P80098	CCL7_HUMAN	99	5	5.05051	17	17.1717	7	7.07071	24	24.2424	22	22.2222	12	12.1212
O75679	RFPL3_HUMAN	317	16	5.04732	32	10.0946	19	5.99369	51	16.0883	47	14.8265	35	11.041
Q9UG22	GIMA2_HUMAN	337	17	5.04451	41	12.1662	25	7.4184	66	19.5846	56	16.6172	39	11.5727
O00175	CCL24_HUMAN	119	6	5.04202	17	14.2857	8	6.72269	25	21.0084	23	19.3277	13	10.9244
A4D161	F221A_HUMAN	298	15	5.03356	32	10.7383	26	8.72483	58	19.4631	44	14.7651	40	13.4228
O43854	EDIL3_HUMAN	480	24	5	51	10.625	44	9.16667	95	19.7917	73	15.2083	68	14.1667
M5A8F1	SUPYN_HUMAN	160	8	5	17	10.625	15	9.375	32	20	25	15.625	23	14.375
Q9UKP4	ATS7_HUMAN	1686	84	4.98221	133	7.88849	106	6.28707	239	14.1756	206	12.2183	183	10.8541
O60636	TSN2_HUMAN	221	11	4.97738	19	8.59729	27	12.2172	46	20.8145	29	13.1222	38	17.1946
Q9BXP8	PAPP2_HUMAN	1791	89	4.96929	140	7.81686	131	7.31435	271	15.1312	223	12.4511	215	12.0045
Q3KNV8	PCGF3_HUMAN	242	12	4.95868	36	14.876	16	6.61157	52	21.4876	47	19.4215	27	11.157
Q8TBB0	THAP6_HUMAN	222	11	4.95495	37	16.6667	17	7.65766	54	24.3243	46	20.7207	27	12.1622
P02776	PLF4_HUMAN	101	5	4.9505	10	9.90099	4	3.9604	14	13.8614	15	14.8515	8	7.92079
Q9NZD1	GPC5D_HUMAN	345	17	4.92754	17	4.92754	41	11.8841	58	16.8116	34	9.85507	57	16.5217
Q9UQ49	NEUR3_HUMAN	428	21	4.90654	38	8.8785	39	9.11215	77	17.9907	57	13.3178	58	13.5514
Q8WWF5	ZNRF4_HUMAN	429	21	4.8951	34	7.92541	24	5.59441	58	13.5198	53	12.3543	45	10.4895
Q9H5I1	SUV92_HUMAN	410	20	4.87805	53	12.9268	41	10	94	22.9268	69	16.8293	60	14.6341
P22674	CCNO_HUMAN	350	17	4.85714	34	9.71429	19	5.42857	53	15.1429	49	14	36	10.2857
Q8WXS8	ATS14_HUMAN	1223	59	4.8242	116	9.48487	85	6.95012	201	16.435	170	13.9002	139	11.3655
Q99675	CGRF1_HUMAN	332	16	4.81928	31	9.33735	37	11.1446	68	20.4819	47	14.1566	51	15.3614
Q9H8W4	PKHF2_HUMAN	249	12	4.81928	33	13.253	17	6.82731	50	20.0803	42	16.8675	28	11.245
O14775	GNB5_HUMAN	395	19	4.81013	41	10.3797	33	8.35443	74	18.7342	58	14.6835	49	12.4051
P17023	ZNF19_HUMAN	458	22	4.80349	48	10.4803	41	8.95197	89	19.4323	70	15.2838	62	13.5371
Q6ZMZ0	RN19B_HUMAN	732	35	4.78142	68	9.28962	33	4.5082	101	13.7978	101	13.7978	65	8.87978
Q86W24	NAL14_HUMAN	1093	52	4.75755	118	10.796	88	8.05124	206	18.8472	164	15.0046	135	12.3513
O00635	TRI38_HUMAN	465	22	4.73118	55	11.828	38	8.17204	93	20	74	15.914	57	12.2581
O60687	SRPX2_HUMAN	465	22	4.73118	53	11.3978	43	9.24731	96	20.6452	70	15.0538	63	13.5484
P0C7P0	CISD3_HUMAN	127	6	4.72441	22	17.3228	9	7.08661	31	24.4094	28	22.0472	12	9.44882
Q9UEG4	ZN629_HUMAN	869	41	4.71807	86	9.89643	51	5.86881	137	15.7652	114	13.1185	92	10.5869
Q9BYJ4	TRI34_HUMAN	488	23	4.71311	63	12.9098	44	9.01639	107	21.9262	82	16.8033	65	13.3197
P04626	ERBB2_HUMAN	1255	59	4.7012	102	8.12749	83	6.61355	185	14.741	155	12.3506	139	11.0757
Q9Y5I7	CLD16_HUMAN	235	11	4.68085	19	8.08511	32	13.617	51	21.7021	29	12.3404	43	18.2979
Q8WXK3	ASB13_HUMAN	278	13	4.67626	25	8.99281	15	5.39568	40	14.3885	36	12.9496	28	10.0719
P02748	CO9_HUMAN	559	26	4.65116	68	12.1646	52	9.30233	120	21.4669	88	15.7424	78	13.9535
P51970	NDUA8_HUMAN	172	8	4.65116	23	13.3721	17	9.88372	40	23.2558	29	16.8605	25	14.5349
Q9NUE0	ZDH18_HUMAN	388	18	4.63918	34	8.76289	37	9.53608	71	18.299	52	13.4021	53	13.6598
Q14802	FXYD3_HUMAN	87	4	4.5977	6	6.89655	6	6.89655	12	13.7931	8	9.1954	10	11.4943
P15529	MCP_HUMAN	392	18	4.59184	35	8.92857	42	10.7143	77	19.6429	50	12.7551	58	14.7959
Q86X76	NIT1_HUMAN	327	15	4.58716	28	8.56269	21	6.42202	49	14.9847	42	12.844	36	11.0092
Q15077	P2RY6_HUMAN	328	15	4.57317	31	9.45122	38	11.5854	69	21.0366	46	14.0244	52	15.8537
O60635	TSN1_HUMAN	241	11	4.56432	13	5.39419	32	13.278	45	18.6722	22	9.12863	41	17.0124
Q8WU68	U2AF4_HUMAN	220	10	4.54545	26	11.8182	24	10.9091	50	22.7273	34	15.4545	33	15
Q9H714	PACER_HUMAN	662	30	4.53172	63	9.51662	53	8.00604	116	17.5227	88	13.2931	79	11.9335
P36406	TRI23_HUMAN	574	26	4.52962	59	10.2787	31	5.4007	90	15.6794	83	14.4599	56	9.7561
Q07108	CD69_HUMAN	199	9	4.52261	17	8.54271	24	12.0603	41	20.603	24	12.0603	33	16.5829
Q9NTQ9	CXB4_HUMAN	266	12	4.51128	27	10.1504	31	11.6541	58	21.8045	37	13.9098	43	16.1654
P32321	DCTD_HUMAN	178	8	4.49438	21	11.7978	14	7.86517	35	19.6629	28	15.7303	22	12.3596
Q8WY64	MYLIP_HUMAN	445	20	4.49438	45	10.1124	31	6.96629	76	17.0787	64	14.382	50	11.236
Q8NEE6	FXL13_HUMAN	735	33	4.4898	93	12.6531	52	7.07483	145	19.7279	122	16.5986	78	10.6122
O00585	CCL21_HUMAN	134	6	4.47761	25	18.6567	5	3.73134	30	22.3881	31	23.1343	11	8.20896
O15393	TMPS2_HUMAN	492	22	4.47154	35	7.11382	46	9.34959	81	16.4634	53	10.7724	67	13.6179
P21860	ERBB3_HUMAN	1342	60	4.47094	125	9.31446	88	6.55738	213	15.8718	180	13.4128	148	11.0283
P49908	SEPP1_HUMAN	381	17	4.46194	42	11.0236	18	4.72441	60	15.748	56	14.6982	33	8.66142
Q96MV8	ZDH15_HUMAN	337	15	4.45104	32	9.49555	51	15.1335	83	24.6291	44	13.0564	63	18.6944
P57730	CAR18_HUMAN	90	4	4.44444	14	15.5556	2	2.22222	16	17.7778	18	20	6	6.66667
Q12836	ZP4_HUMAN	540	24	4.44444	43	7.96296	38	7.03704	81	15	65	12.037	61	11.2963
Q96FV3	TSN17_HUMAN	270	12	4.44444	19	7.03704	38	14.0741	57	21.1111	30	11.1111	50	18.5185
Q9Y5Q6	INSL5_HUMAN	135	6	4.44444	16	11.8519	11	8.14815	27	20	22	16.2963	17	12.5926
Q9BYZ8	REG4_HUMAN	158	7	4.43038	17	10.7595	20	12.6582	37	23.4177	24	15.1899	27	17.0886
Q5VT99	LRC38_HUMAN	294	13	4.42177	25	8.5034	20	6.80272	45	15.3061	37	12.585	33	11.2245
Q9H2S6	TNMD_HUMAN	317	14	4.4164	37	11.6719	34	10.7256	71	22.3975	50	15.7729	44	13.8801
P50151	GBG10_HUMAN	68	3	4.41176	7	10.2941	2	2.94118	9	13.2353	10	14.7059	4	5.88235
Q9UJW3	DNM3L_HUMAN	386	17	4.40415	36	9.32642	38	9.84456	74	19.171	52	13.4715	53	13.7306
P13284	GILT_HUMAN	250	11	4.4	16	6.4	20	8	36	14.4	26	10.4	31	12.4
P21926	CD9_HUMAN	228	10	4.38596	21	9.21053	29	12.7193	50	21.9298	30	13.1579	39	17.1053
Q92673	SORL_HUMAN	2214	97	4.38121	204	9.21409	218	9.84643	422	19.0605	287	12.963	313	14.1373
Q9GZV8	PRD14_HUMAN	571	25	4.37828	55	9.63222	54	9.45709	109	19.0893	75	13.1349	76	13.31
Q96CA5	BIRC7_HUMAN	298	13	4.36242	29	9.73154	20	6.71141	49	16.443	39	13.0872	32	10.7383
Q8IYR2	SMYD4_HUMAN	804	35	4.35323	83	10.3234	45	5.59701	128	15.9204	115	14.3035	76	9.45274
D3W0D1	KLRF2_HUMAN	207	9	4.34783	16	7.72947	29	14.0097	45	21.7391	23	11.1111	37	17.8744
P03999	OPSB_HUMAN	345	15	4.34783	24	6.95652	54	15.6522	78	22.6087	39	11.3043	66	19.1304
Q9NRA1	PDGFC_HUMAN	345	15	4.34783	34	9.85507	26	7.53623	60	17.3913	48	13.913	39	11.3043
A6NNY8	UBP27_HUMAN	438	19	4.3379	44	10.0457	33	7.53425	77	17.5799	60	13.6986	52	11.8721
O15520	FGF10_HUMAN	208	9	4.32692	28	13.4615	22	10.5769	50	24.0385	37	17.7885	31	14.9038
Q96G75	RMD5B_HUMAN	393	17	4.3257	40	10.1781	25	6.36132	65	16.5394	55	13.9949	40	10.1781
Q9GZX5	ZN350_HUMAN	532	23	4.32331	63	11.8421	37	6.95489	100	18.797	84	15.7895	60	11.2782
Q9UKP3	ITBP2_HUMAN	347	15	4.32277	29	8.35735	22	6.34006	51	14.6974	44	12.6801	37	10.6628
Q9P003	CNIH4_HUMAN	139	6	4.31655	8	5.7554	19	13.6691	27	19.4245	14	10.0719	25	17.9856
Q9BWT1	CDCA7_HUMAN	371	16	4.31267	67	18.0593	19	5.12129	86	23.1806	82	22.1024	33	8.89488
Q13253	NOGG_HUMAN	232	10	4.31034	27	11.6379	16	6.89655	43	18.5345	33	14.2241	25	10.7759
Q9H9Z2	LN28A_HUMAN	209	9	4.30622	26	12.4402	14	6.69856	40	19.1388	33	15.7895	21	10.0478
Q16627	CCL14_HUMAN	93	4	4.30108	11	11.828	11	11.828	22	23.6559	15	16.129	15	16.129
Q9BY15	AGRE3_HUMAN	652	28	4.29448	53	8.12883	62	9.5092	115	17.638	78	11.9632	85	13.0368
O43543	XRCC2_HUMAN	280	12	4.28571	27	9.64286	27	9.64286	54	19.2857	36	12.8571	35	12.5
O00217	NDUS8_HUMAN	210	9	4.28571	26	12.381	17	8.09524	43	20.4762	32	15.2381	24	11.4286
Q9NQ69	LHX9_HUMAN	397	17	4.28212	49	12.3426	26	6.54912	75	18.8917	62	15.6171	41	10.3275
P48066	S6A11_HUMAN	632	27	4.27215	44	6.96203	83	13.1329	127	20.0949	71	11.2342	108	17.0886
Q8N2H9	PELI3_HUMAN	469	20	4.26439	45	9.59488	29	6.18337	74	15.7783	64	13.6461	48	10.2345
Q9NRQ2	PLS4_HUMAN	329	14	4.25532	23	6.99088	29	8.81459	52	15.8055	36	10.9422	42	12.766
Q9NUK0	MBNL3_HUMAN	354	15	4.23729	32	9.03955	18	5.08475	50	14.1243	44	12.4294	33	9.32203
O00144	FZD9_HUMAN	591	25	4.23012	48	8.12183	60	10.1523	108	18.2741	71	12.0135	85	14.3824
Q9Y574	ASB4_HUMAN	426	18	4.22535	42	9.85915	35	8.21596	77	18.0751	58	13.615	52	12.2066
O15392	BIRC5_HUMAN	142	6	4.22535	22	15.493	13	9.15493	35	24.6479	28	19.7183	18	12.6761
Q86UY6	NAA40_HUMAN	237	10	4.21941	35	14.7679	23	9.70464	58	24.4726	45	18.9873	32	13.5021
P05451	REG1A_HUMAN	166	7	4.21687	14	8.43373	23	13.8554	37	22.2892	21	12.6506	27	16.2651
P29275	AA2BR_HUMAN	332	14	4.21687	21	6.3253	36	10.8434	57	17.1687	34	10.241	49	14.759
P48304	REG1B_HUMAN	166	7	4.21687	15	9.03614	22	13.253	37	22.2892	22	13.253	26	15.6627
Q7Z4K8	TRI46_HUMAN	759	32	4.21607	82	10.8037	46	6.06061	128	16.8643	114	15.0198	75	9.88142
Q9H0E7	UBP44_HUMAN	712	30	4.21348	79	11.0955	56	7.86517	135	18.9607	109	15.309	83	11.6573
Q8NHC4	O10J5_HUMAN	309	13	4.20712	19	6.14887	34	11.0032	53	17.1521	32	10.356	45	14.5631
Q6P2D0	ZFP1_HUMAN	407	17	4.1769	56	13.7592	39	9.58231	95	23.3415	73	17.9361	55	13.5135
Q86YT6	MIB1_HUMAN	1006	42	4.17495	116	11.5308	44	4.37376	160	15.9046	152	15.1093	86	8.54871
O14804	TAAR5_HUMAN	337	14	4.1543	23	6.82493	49	14.5401	72	21.365	37	10.9792	61	18.1009
Q8IYL9	GPR65_HUMAN	337	14	4.1543	34	10.089	43	12.7596	77	22.8487	46	13.6499	54	16.0237
Q15326	ZMY11_HUMAN	602	25	4.15282	104	17.2757	45	7.47508	149	24.7508	125	20.7641	66	10.9635
Q9UKW6	ELF5_HUMAN	265	11	4.15094	29	10.9434	36	13.5849	65	24.5283	40	15.0943	44	16.6038
Q9UGK8	SRGEF_HUMAN	458	19	4.14847	33	7.20524	34	7.42358	67	14.6288	51	11.1354	52	11.3537
P32970	CD70_HUMAN	193	8	4.14508	15	7.77202	11	5.69948	26	13.4715	23	11.9171	19	9.84456
Q9Y672	ALG6_HUMAN	507	21	4.14201	42	8.28402	72	14.2012	114	22.4852	62	12.2288	88	17.357
Q17RB8	LONF1_HUMAN	773	32	4.13972	98	12.6779	56	7.2445	154	19.9224	126	16.3001	82	10.608
O43603	GALR2_HUMAN	387	16	4.13437	32	8.26873	35	9.04393	67	17.3127	48	12.4031	50	12.9199
O00453	LST1_HUMAN	97	4	4.12371	13	13.4021	5	5.15464	18	18.5567	17	17.5258	9	9.27835
P61927	RL37_HUMAN	97	4	4.12371	28	28.866	7	7.21649	35	36.0825	30	30.9278	11	11.3402
Q8N5P1	ZC3H8_HUMAN	291	12	4.12371	52	17.8694	20	6.87285	72	24.7423	62	21.3058	30	10.3093
Q96CG8	CTHR1_HUMAN	243	10	4.11523	25	10.2881	16	6.58436	41	16.8724	34	13.9918	26	10.6996
P30281	CCND3_HUMAN	292	12	4.10959	31	10.6164	15	5.13699	46	15.7534	42	14.3836	27	9.24658
Q07326	PIGF_HUMAN	219	9	4.10959	13	5.93607	31	14.1553	44	20.0913	21	9.58904	40	18.2648
O14978	ZN263_HUMAN	683	28	4.09956	76	11.1274	35	5.12445	111	16.2518	97	14.202	63	9.22401
Q9C030	TRIM6_HUMAN	488	20	4.09836	59	12.0902	40	8.19672	99	20.2869	77	15.7787	58	11.8852
Q96MT3	PRIC1_HUMAN	831	34	4.09146	93	11.1913	69	8.30325	162	19.4946	126	15.1625	97	11.6727
O14763	TR10B_HUMAN	440	18	4.09091	47	10.6818	17	3.86364	64	14.5455	62	14.0909	34	7.72727
O15551	CLD3_HUMAN	220	9	4.09091	15	6.81818	17	7.72727	32	14.5455	24	10.9091	26	11.8182
P28698	MZF1_HUMAN	734	30	4.08719	83	11.3079	40	5.44959	123	16.7575	109	14.8501	70	9.53678
P29034	S10A2_HUMAN	98	4	4.08163	9	9.18367	9	9.18367	18	18.3673	13	13.2653	13	13.2653
P56851	EP3B_HUMAN	147	6	4.08163	18	12.2449	19	12.9252	37	25.1701	22	14.966	25	17.0068
P62745	RHOB_HUMAN	196	8	4.08163	25	12.7551	13	6.63265	38	19.3878	33	16.8367	20	10.2041
Q8IZI9	IFNL3_HUMAN	196	8	4.08163	24	12.2449	6	3.06122	30	15.3061	31	15.8163	14	7.14286
Q96LD4	TRI47_HUMAN	638	26	4.07524	67	10.5016	36	5.64263	103	16.1442	91	14.2633	59	9.24765
Q9H5H4	ZN768_HUMAN	540	22	4.07407	59	10.9259	42	7.77778	101	18.7037	73	13.5185	63	11.6667
Q6ZSM3	MOT12_HUMAN	516	21	4.06977	35	6.78295	58	11.2403	93	18.0233	54	10.4651	79	15.3101
Q9NRX6	KISHB_HUMAN	74	3	4.05405	9	12.1622	12	16.2162	21	28.3784	12	16.2162	15	20.2703
P16410	CTLA4_HUMAN	223	9	4.03587	16	7.17489	23	10.3139	39	17.4888	25	11.2108	31	13.9013
Q6P3W2	DJC24_HUMAN	149	6	4.02685	15	10.0671	13	8.72483	28	18.7919	19	12.7517	19	12.7517
P11766	ADHX_HUMAN	374	15	4.0107	38	10.1604	24	6.41711	62	16.5775	52	13.9037	38	10.1604
P35462	DRD3_HUMAN	400	16	4	33	8.25	38	9.5	71	17.75	49	12.25	53	13.25
Q6TFL4	KLH24_HUMAN	600	24	4	63	10.5	60	10	123	20.5	84	14	82	13.6667
A0A0K2S4Q6	CD3CH_HUMAN	201	8	3.9801	12	5.97015	15	7.46269	27	13.4328	19	9.45274	22	10.9453
O14960	LECT2_HUMAN	151	6	3.97351	15	9.93377	11	7.28477	26	17.2185	21	13.9073	16	10.596
Q9NRX5	SERC1_HUMAN	453	18	3.97351	26	5.73951	58	12.8035	84	18.543	42	9.27152	74	16.3355
Q6ZS10	CL17A_HUMAN	378	15	3.96825	28	7.40741	35	9.25926	63	16.6667	41	10.8466	49	12.963
Q8N143	BCL6B_HUMAN	479	19	3.9666	45	9.39457	30	6.26305	75	15.6576	61	12.7349	49	10.2296
Q8ND25	ZNRF1_HUMAN	227	9	3.96476	18	7.92952	15	6.60793	33	14.5374	26	11.4537	24	10.5727
P26447	S10A4_HUMAN	101	4	3.9604	16	15.8416	10	9.90099	26	25.7426	20	19.802	13	12.8713
O43897	TLL1_HUMAN	1013	40	3.94867	110	10.8588	103	10.1678	213	21.0267	148	14.6101	139	13.7216
P48742	LHX1_HUMAN	406	16	3.94089	44	10.8374	31	7.63547	75	18.4729	55	13.5468	46	11.33
Q8TDF5	NETO1_HUMAN	533	21	3.93996	60	11.257	46	8.63039	106	19.8874	80	15.0094	63	11.8199
P46089	GPR3_HUMAN	330	13	3.93939	15	4.54545	31	9.39394	46	13.9394	28	8.48485	42	12.7273
Q5VTD9	GFI1B_HUMAN	330	13	3.93939	37	11.2121	26	7.87879	63	19.0909	48	14.5455	38	11.5152
O00187	MASP2_HUMAN	686	27	3.93586	54	7.87172	69	10.0583	123	17.93	80	11.6618	93	13.5569
O00743	PPP6_HUMAN	305	12	3.93443	32	10.4918	36	11.8033	68	22.2951	43	14.0984	45	14.7541
P17040	ZSC20_HUMAN	1043	41	3.93097	117	11.2176	78	7.47843	195	18.6961	146	13.9981	119	11.4094
Q9BY78	RNF26_HUMAN	433	17	3.9261	40	9.23788	22	5.08083	62	14.3187	56	12.933	39	9.00693
Q9BY42	RTF2_HUMAN	306	12	3.92157	51	16.6667	15	4.90196	66	21.5686	62	20.2614	24	7.84314
Q9ULV1	FZD4_HUMAN	537	21	3.91061	44	8.19367	57	10.6145	101	18.8082	61	11.3594	78	14.5251
Q7Z418	KCNKI_HUMAN	384	15	3.90625	31	8.07292	49	12.7604	80	20.8333	45	11.7188	61	15.8854
O14901	KLF11_HUMAN	512	20	3.90625	50	9.76562	18	3.51562	68	13.2812	70	13.6719	38	7.42188
P46094	XCR1_HUMAN	333	13	3.9039	24	7.20721	54	16.2162	78	23.4234	36	10.8108	64	19.2192
Q8NFT6	DBF4B_HUMAN	615	24	3.90244	62	10.0813	35	5.69106	97	15.7724	83	13.4959	57	9.26829
P10276	RARA_HUMAN	462	18	3.8961	47	10.1732	25	5.41126	72	15.5844	62	13.4199	42	9.09091
Q6NW40	RGMB_HUMAN	437	17	3.89016	36	8.23799	28	6.40732	64	14.6453	52	11.8993	43	9.83982
Q9Y484	WIPI4_HUMAN	360	14	3.88889	38	10.5556	27	7.5	65	18.0556	51	14.1667	39	10.8333
Q9UM63	PLAL1_HUMAN	463	18	3.88769	45	9.71922	28	6.04752	73	15.7667	61	13.1749	44	9.50324
O14638	ENPP3_HUMAN	875	34	3.88571	81	9.25714	89	10.1714	170	19.4286	111	12.6857	121	13.8286
Q6UXZ4	UNC5D_HUMAN	953	37	3.88248	82	8.60441	74	7.76495	156	16.3694	116	12.1721	105	11.0178
Q8WX94	NALP7_HUMAN	980	38	3.87755	110	11.2245	74	7.55102	184	18.7755	145	14.7959	109	11.1224
O00322	UPK1A_HUMAN	258	10	3.87597	15	5.81395	34	13.1783	49	18.9922	25	9.68992	43	16.6667
P49019	HCAR3_HUMAN	387	15	3.87597	38	9.81912	49	12.6615	87	22.4806	52	13.4367	62	16.0207
O95047	OR2A4_HUMAN	310	12	3.87097	22	7.09677	32	10.3226	54	17.4194	34	10.9677	42	13.5484
Q9C019	TRI15_HUMAN	465	18	3.87097	52	11.1828	28	6.02151	80	17.2043	66	14.1935	42	9.03226
P25106	ACKR3_HUMAN	362	14	3.8674	25	6.90608	49	13.5359	74	20.442	39	10.7735	61	16.8508
Q6TCH7	PAQR3_HUMAN	311	12	3.85852	20	6.43087	52	16.7203	72	23.1511	32	10.2894	61	19.6141
Q9P055	JKAMP_HUMAN	311	12	3.85852	22	7.07395	41	13.1833	63	20.2572	34	10.9325	50	16.0772
P01877	IGHA2_HUMAN	391	15	3.83632	25	6.39386	25	6.39386	50	12.7877	40	10.2302	40	10.2302
O94889	KLH18_HUMAN	574	22	3.83275	45	7.83972	48	8.36237	93	16.2021	62	10.8014	69	12.0209
P01732	CD8A_HUMAN	235	9	3.82979	18	7.65957	21	8.93617	39	16.5957	25	10.6383	28	11.9149
Q9C0B0	UNK_HUMAN	810	31	3.82716	73	9.01235	52	6.41975	125	15.4321	98	12.0988	80	9.87654
Q13822	ENPP2_HUMAN	863	33	3.82387	91	10.5446	91	10.5446	182	21.0892	118	13.6732	124	14.3685
Q53QV2	LBH_HUMAN	105	4	3.80952	11	10.4762	5	4.7619	16	15.2381	14	13.3333	9	8.57143
Q9HAT8	PELI2_HUMAN	420	16	3.80952	40	9.52381	34	8.09524	74	17.619	56	13.3333	49	11.6667
Q9NZV7	ZIM2_HUMAN	527	20	3.79507	66	12.5237	39	7.40038	105	19.9241	84	15.9393	58	11.0057
O15541	R113A_HUMAN	343	13	3.79009	48	13.9942	28	8.16327	76	22.1574	58	16.9096	39	11.3703
Q96C55	ZN524_HUMAN	264	10	3.78788	33	12.5	9	3.40909	42	15.9091	42	15.9091	18	6.81818
A0JP26	POTB3_HUMAN	581	22	3.78657	81	13.9415	20	3.44234	101	17.3838	100	17.2117	40	6.88468
Q6ZRF8	RN207_HUMAN	634	24	3.78549	68	10.7256	31	4.88959	99	15.6151	87	13.7224	53	8.35962
O43593	HAIR_HUMAN	1189	45	3.78469	104	8.74685	62	5.21447	166	13.9613	142	11.9428	105	8.83095
P04090	REL2_HUMAN	185	7	3.78378	23	12.4324	13	7.02703	36	19.4595	29	15.6757	19	10.2703
P41146	OPRX_HUMAN	370	14	3.78378	29	7.83784	34	9.18919	63	17.027	43	11.6216	46	12.4324
Q15024	EXOS7_HUMAN	291	11	3.78007	32	10.9966	16	5.49828	48	16.4948	42	14.433	27	9.27835
P36897	TGFR1_HUMAN	503	19	3.77734	51	10.1392	35	6.95825	86	17.0974	69	13.7177	52	10.338
Q8WY41	NANO1_HUMAN	292	11	3.76712	30	10.274	15	5.13699	45	15.411	41	14.0411	24	8.21918
O15143	ARC1B_HUMAN	372	14	3.76344	40	10.7527	32	8.60215	72	19.3548	51	13.7097	45	12.0968
Q01081	U2AF1_HUMAN	240	9	3.75	44	18.3333	22	9.16667	66	27.5	51	21.25	30	12.5
O00254	PAR3_HUMAN	374	14	3.74332	21	5.61497	60	16.0428	81	21.6578	34	9.09091	70	18.7166
P19875	CXCL2_HUMAN	107	4	3.73832	16	14.9533	0	0	16	14.9533	19	17.757	4	3.73832
Q96GX1	TECT2_HUMAN	697	26	3.73027	45	6.45624	60	8.60832	105	15.0646	69	9.89957	85	12.1951
P51959	CCNG1_HUMAN	295	11	3.72881	39	13.2203	23	7.79661	62	21.0169	46	15.5932	34	11.5254
Q8NHG8	ZNRF2_HUMAN	242	9	3.71901	17	7.02479	10	4.13223	27	11.157	25	10.3306	19	7.85124
O60449	LY75_HUMAN	1722	64	3.71661	174	10.1045	211	12.2532	385	22.3577	227	13.1823	271	15.7375
P09758	TACD2_HUMAN	323	12	3.71517	45	13.9319	16	4.95356	61	18.8854	54	16.7183	27	8.35913
Q8IYV9	IZUM1_HUMAN	350	13	3.71429	38	10.8571	25	7.14286	63	18	49	14	36	10.2857
Q13263	TIF1B_HUMAN	835	31	3.71257	79	9.46108	36	4.31138	115	13.7725	109	13.0539	62	7.42515
Q13705	AVR2B_HUMAN	512	19	3.71094	47	9.17969	44	8.59375	91	17.7734	64	12.5	60	11.7188
O95125	ZN202_HUMAN	648	24	3.7037	66	10.1852	42	6.48148	108	16.6667	86	13.2716	65	10.0309
P27037	AVR2A_HUMAN	513	19	3.7037	49	9.55166	44	8.577	93	18.1287	67	13.0604	62	12.0858
Q13794	APR_HUMAN	54	2	3.7037	11	20.3704	3	5.55556	14	25.9259	13	24.0741	4	7.40741
Q6XZB0	LIPI_HUMAN	460	17	3.69565	50	10.8696	52	11.3043	102	22.1739	66	14.3478	68	14.7826
Q9NWF9	RN216_HUMAN	866	32	3.69515	87	10.0462	61	7.04388	148	17.0901	111	12.8176	91	10.5081
P50458	LHX2_HUMAN	406	15	3.69458	47	11.5764	25	6.15764	72	17.734	58	14.2857	38	9.35961
Q5VZY2	PLPP4_HUMAN	271	10	3.69004	24	8.85609	28	10.3321	52	19.1882	33	12.1771	37	13.6531
Q8NBQ7	AQP11_HUMAN	271	10	3.69004	14	5.16605	27	9.9631	41	15.1292	24	8.85609	36	13.2841
P61587	RND3_HUMAN	244	9	3.68852	31	12.7049	14	5.7377	45	18.4426	39	15.9836	22	9.01639
Q9H8H3	TMT1A_HUMAN	244	9	3.68852	24	9.83607	33	13.5246	57	23.3607	33	13.5246	42	17.2131
Q9NWH7	SPAT6_HUMAN	488	18	3.68852	71	14.5492	35	7.17213	106	21.7213	87	17.8279	51	10.4508
O75469	NR1I2_HUMAN	434	16	3.68664	56	12.9032	36	8.29493	92	21.1982	70	16.129	51	11.7512
P35414	APJ_HUMAN	380	14	3.68421	29	7.63158	50	13.1579	79	20.7895	42	11.0526	61	16.0526
A0A1B0GTW7	CIROP_HUMAN	788	29	3.6802	60	7.61421	50	6.34518	110	13.9594	83	10.533	75	9.51777
Q9Y462	ZN711_HUMAN	761	28	3.67937	102	13.4034	38	4.99343	140	18.3968	123	16.1629	62	8.14717
Q96T53	MBOA4_HUMAN	435	16	3.67816	32	7.35632	63	14.4828	95	21.8391	47	10.8046	76	17.4713
Q5VTE6	ANGE2_HUMAN	544	20	3.67647	56	10.2941	47	8.63971	103	18.9338	73	13.4191	65	11.9485
O15151	MDM4_HUMAN	490	18	3.67347	50	10.2041	28	5.71429	78	15.9184	66	13.4694	44	8.97959
P49356	FNTB_HUMAN	437	16	3.66133	29	6.63616	44	10.0686	73	16.7048	43	9.83982	56	12.8146
Q6PJG6	BRAT1_HUMAN	821	30	3.65408	55	6.69915	44	5.35932	99	12.0585	83	10.1096	73	8.8916
P56880	CLD20_HUMAN	219	8	3.65297	13	5.93607	16	7.30594	29	13.242	20	9.13242	23	10.5023
O95977	S1PR4_HUMAN	384	14	3.64583	37	9.63542	35	9.11458	72	18.75	50	13.0208	47	12.2396
P60763	RAC3_HUMAN	192	7	3.64583	21	10.9375	13	6.77083	34	17.7083	26	13.5417	20	10.4167
Q13489	BIRC3_HUMAN	604	22	3.64238	62	10.2649	47	7.78146	109	18.0464	78	12.9139	67	11.0927
Q9H8X9	ZDH11_HUMAN	412	15	3.64078	39	9.46602	36	8.73786	75	18.2039	53	12.8641	49	11.8932
O15198	SMAD9_HUMAN	467	17	3.64026	43	9.20771	38	8.13704	81	17.3448	59	12.6338	52	11.1349
Q86UE6	LRRT1_HUMAN	522	19	3.63985	42	8.04598	43	8.23755	85	16.2835	59	11.3027	61	11.6858
Q9H0Y0	ATG10_HUMAN	220	8	3.63636	17	7.72727	25	11.3636	42	19.0909	25	11.3636	32	14.5455
P32298	GRK4_HUMAN	578	21	3.63322	88	15.2249	57	9.86159	145	25.0865	109	18.8581	75	12.9758
Q96B26	EXOS8_HUMAN	276	10	3.62319	27	9.78261	16	5.7971	43	15.5797	37	13.4058	25	9.05797
A6NI61	MYMK_HUMAN	221	8	3.61991	20	9.04977	30	13.5747	50	22.6244	28	12.6697	38	17.1946
P31391	SSR4_HUMAN	388	14	3.60825	30	7.73196	34	8.76289	64	16.4948	43	11.0825	47	12.1134
H0YL14	TM250_HUMAN	139	5	3.59712	17	12.2302	20	14.3885	37	26.6187	22	15.8273	23	16.5468
Q7Z410	TMPS9_HUMAN	1059	38	3.58829	92	8.68744	69	6.51558	161	15.203	125	11.8036	105	9.91501
P21728	DRD1_HUMAN	446	16	3.58744	36	8.07175	45	10.0897	81	18.1614	52	11.6592	58	13.0045
Q9NX65	ZSC32_HUMAN	697	25	3.5868	86	12.3386	46	6.59971	132	18.9383	108	15.495	69	9.89957
O43865	SAHH2_HUMAN	530	19	3.58491	61	11.5094	38	7.16981	99	18.6792	79	14.9057	54	10.1887
P09668	CATH_HUMAN	335	12	3.58209	30	8.95522	41	12.2388	71	21.194	42	12.5373	52	15.5224
P37023	ACVL1_HUMAN	503	18	3.57853	49	9.74155	32	6.36183	81	16.1034	67	13.3201	48	9.54274
Q9ULP9	TBC24_HUMAN	559	20	3.57782	62	11.0912	57	10.1968	119	21.288	82	14.6691	74	13.2379
O75594	PGRP1_HUMAN	196	7	3.57143	16	8.16327	16	8.16327	32	16.3265	23	11.7347	22	11.2245
P22897	MRC1_HUMAN	1456	52	3.57143	145	9.95879	184	12.6374	329	22.5962	192	13.1868	229	15.728
P56270	MAZ_HUMAN	477	17	3.56394	40	8.38574	17	3.56394	57	11.9497	55	11.5304	34	7.12788
Q96B86	RGMA_HUMAN	450	16	3.55556	44	9.77778	35	7.77778	79	17.5556	58	12.8889	49	10.8889
Q14416	GRM2_HUMAN	872	31	3.55505	80	9.17431	87	9.97706	167	19.1514	107	12.2706	117	13.4174
O95571	ETHE1_HUMAN	254	9	3.54331	23	9.05512	15	5.90551	38	14.9606	31	12.2047	24	9.44882
P49619	DGKG_HUMAN	791	28	3.53982	89	11.2516	63	7.9646	152	19.2162	111	14.0329	86	10.8723
P63172	DYLT1_HUMAN	113	4	3.53982	7	6.19469	11	9.73451	18	15.9292	11	9.73451	14	12.3894
O14495	PLPP3_HUMAN	311	11	3.53698	32	10.2894	36	11.5756	68	21.865	42	13.5048	45	14.4695
Q2NKJ3	CTC1_HUMAN	1217	43	3.53328	100	8.21693	82	6.73788	182	14.9548	141	11.5859	121	9.94248
Q8N2W9	PIAS4_HUMAN	510	18	3.52941	50	9.80392	28	5.4902	78	15.2941	67	13.1373	44	8.62745
Q9H1B4	NXF5_HUMAN	397	14	3.52645	53	13.3501	34	8.56423	87	21.9144	66	16.6247	47	11.8388
P34982	OR1D2_HUMAN	312	11	3.52564	22	7.05128	38	12.1795	60	19.2308	33	10.5769	47	15.0641
Q96KK4	O10C1_HUMAN	312	11	3.52564	18	5.76923	35	11.2179	53	16.9872	29	9.29487	44	14.1026
Q96GN5	CDA7L_HUMAN	454	16	3.52423	73	16.0793	32	7.04846	105	23.1278	87	19.163	46	10.1322
O43903	GAS2_HUMAN	313	11	3.51438	44	14.0575	19	6.07029	63	20.1278	54	17.2524	28	8.94569
O00321	ETV2_HUMAN	342	12	3.50877	31	9.06433	29	8.47953	60	17.5439	42	12.2807	40	11.6959
P32241	VIPR1_HUMAN	457	16	3.50109	37	8.09628	57	12.4726	94	20.5689	53	11.5974	71	15.5361
Q9Y2K6	UBP20_HUMAN	914	32	3.50109	93	10.1751	74	8.09628	167	18.2713	123	13.4573	102	11.1597
Q96P53	WDFY2_HUMAN	400	14	3.5	41	10.25	32	8	73	18.25	52	13	46	11.5
Q7Z6M3	MILR1_HUMAN	343	12	3.49854	38	11.0787	31	9.0379	69	20.1166	48	13.9942	41	11.9534
Q63ZY6	NSN5C_HUMAN	315	11	3.49206	33	10.4762	16	5.07937	49	15.5556	42	13.3333	27	8.57143
Q8TAP6	CEP76_HUMAN	659	23	3.49014	66	10.0152	50	7.58725	116	17.6024	89	13.5053	71	10.7739
Q9H3K6	BOLA2_HUMAN	86	3	3.48837	12	13.9535	5	5.81395	17	19.7674	14	16.2791	8	9.30233
P52798	EFNA4_HUMAN	201	7	3.48259	18	8.95522	21	10.4478	39	19.403	25	12.4378	28	13.9303
Q9UJW0	DCTN4_HUMAN	460	16	3.47826	58	12.6087	31	6.73913	89	19.3478	71	15.4348	43	9.34783
Q9HCM9	TRI39_HUMAN	518	18	3.4749	75	14.4788	35	6.75676	110	21.2355	89	17.1815	51	9.84556
Q9BXT4	TDRD1_HUMAN	1180	41	3.47458	118	10	78	6.61017	196	16.6102	152	12.8814	112	9.49153
Q8NEZ5	FBX22_HUMAN	403	14	3.47395	42	10.4218	27	6.69975	69	17.1216	55	13.6476	41	10.1737
Q86VI4	LAP4B_HUMAN	317	11	3.47003	30	9.46372	29	9.14826	59	18.612	41	12.9338	39	12.3028
O75365	TP4A3_HUMAN	173	6	3.46821	25	14.4509	13	7.51445	38	21.9653	30	17.341	18	10.4046
P23942	PRPH2_HUMAN	346	12	3.46821	36	10.4046	40	11.5607	76	21.9653	46	13.2948	52	15.0289
O15529	GPR42_HUMAN	346	12	3.46821	23	6.6474	42	12.1387	65	18.7861	34	9.82659	53	15.3179
P05452	TETN_HUMAN	202	7	3.46535	21	10.396	17	8.41584	38	18.8119	26	12.8713	24	11.8812
Q9HA38	ZMAT3_HUMAN	289	10	3.46021	32	11.0727	19	6.57439	51	17.6471	42	14.5329	26	8.99654
Q6UVW9	CLC2A_HUMAN	174	6	3.44828	19	10.9195	24	13.7931	43	24.7126	24	13.7931	29	16.6667
Q8TD46	MO2R1_HUMAN	348	12	3.44828	32	9.1954	24	6.89655	56	16.092	43	12.3563	36	10.3448
Q99795	GPA33_HUMAN	319	11	3.44828	28	8.77743	17	5.32915	45	14.1066	39	12.2257	26	8.15047
Q9H4T2	ZSC16_HUMAN	348	12	3.44828	54	15.5172	22	6.32184	76	21.8391	62	17.8161	34	9.77011
P51168	SCNNB_HUMAN	640	22	3.4375	53	8.28125	65	10.1562	118	18.4375	75	11.7188	85	13.2812
Q96FZ5	CKLF7_HUMAN	175	6	3.42857	8	4.57143	18	10.2857	26	14.8571	14	8	24	13.7143
Q9NPB9	ACKR4_HUMAN	350	12	3.42857	29	8.28571	45	12.8571	74	21.1429	40	11.4286	55	15.7143
Q6P988	NOTUM_HUMAN	496	17	3.42742	51	10.2823	39	7.8629	90	18.1452	66	13.3065	54	10.8871
Q9NZJ0	DTL_HUMAN	730	25	3.42466	82	11.2329	51	6.9863	133	18.2192	103	14.1096	73	10
Q01151	CD83_HUMAN	205	7	3.41463	23	11.2195	16	7.80488	39	19.0244	29	14.1463	23	11.2195
P49863	GRAK_HUMAN	264	9	3.40909	29	10.9848	21	7.95455	50	18.9394	37	14.0152	30	11.3636
Q9H4S2	GSX1_HUMAN	264	9	3.40909	29	10.9848	12	4.54545	41	15.5303	36	13.6364	20	7.57576
Q9BQ90	KLDC3_HUMAN	382	13	3.40314	40	10.4712	43	11.2565	83	21.7277	53	13.8743	54	14.1361
Q9UFC0	LRWD1_HUMAN	647	22	3.40031	63	9.73725	41	6.33694	104	16.0742	84	12.983	62	9.58269
Q5QP82	DCA10_HUMAN	559	19	3.39893	55	9.839	34	6.08229	89	15.9213	72	12.8801	53	9.48122
Q96K21	ANCHR_HUMAN	471	16	3.39703	54	11.465	22	4.67091	76	16.1359	67	14.2251	35	7.431
P18510	IL1RA_HUMAN	177	6	3.38983	18	10.1695	16	9.03955	34	19.209	24	13.5593	22	12.4294
Q6U736	OPN5_HUMAN	354	12	3.38983	31	8.75706	49	13.8418	80	22.5989	43	12.1469	59	16.6667
Q7Z3B1	NEGR1_HUMAN	354	12	3.38983	25	7.06215	29	8.19209	54	15.2542	35	9.88701	41	11.5819
Q96BP2	CHCH1_HUMAN	118	4	3.38983	20	16.9492	5	4.23729	25	21.1864	24	20.339	9	7.62712
Q8WW38	FOG2_HUMAN	1151	39	3.38836	114	9.90443	61	5.29974	175	15.2042	145	12.5977	92	7.99305
Q9NQX5	NPDC1_HUMAN	325	11	3.38462	30	9.23077	11	3.38462	41	12.6154	40	12.3077	20	6.15385
Q9Y287	ITM2B_HUMAN	266	9	3.38346	28	10.5263	28	10.5263	56	21.0526	36	13.5338	34	12.782
O75339	CILP1_HUMAN	1184	40	3.37838	142	11.9932	97	8.19257	239	20.1858	175	14.7804	134	11.3176
Q8IWV7	UBR1_HUMAN	1749	59	3.37336	174	9.94854	151	8.6335	325	18.582	227	12.9788	202	11.5495
O60831	PRAF2_HUMAN	178	6	3.37079	17	9.55056	11	6.17978	28	15.7303	22	12.3596	16	8.98876
Q8N6F7	GCSAM_HUMAN	178	6	3.37079	18	10.1124	13	7.30337	31	17.4157	23	12.9213	18	10.1124
Q01718	ACTHR_HUMAN	297	10	3.367	22	7.40741	37	12.4579	59	19.8653	32	10.7744	42	14.1414
Q99075	HBEGF_HUMAN	208	7	3.36538	33	15.8654	10	4.80769	43	20.6731	39	18.75	16	7.69231
Q9H0R3	TM222_HUMAN	208	7	3.36538	13	6.25	24	11.5385	37	17.7885	20	9.61538	29	13.9423
Q8N0Y2	ZN444_HUMAN	327	11	3.36391	34	10.3976	16	4.89297	50	15.2905	45	13.7615	27	8.25688
P32239	GASR_HUMAN	447	15	3.3557	38	8.50112	30	6.71141	68	15.2125	51	11.4094	44	9.8434
Q6ZMU5	TRI72_HUMAN	477	16	3.3543	50	10.4822	27	5.66038	77	16.1426	66	13.8365	40	8.38574
Q96FA3	PELI1_HUMAN	418	14	3.34928	41	9.80861	35	8.37321	76	18.1818	55	13.1579	48	11.4833
Q5DID0	UROL1_HUMAN	1318	44	3.33839	100	7.58725	94	7.13202	194	14.7193	142	10.7739	133	10.091
P09466	PAEP_HUMAN	180	6	3.33333	16	8.88889	13	7.22222	29	16.1111	22	12.2222	19	10.5556
Q02108	GCYA1_HUMAN	690	23	3.33333	77	11.1594	53	7.68116	130	18.8406	100	14.4928	72	10.4348
Q6P461	ACSM6_HUMAN	480	16	3.33333	49	10.2083	46	9.58333	95	19.7917	62	12.9167	60	12.5
Q9NS86	LANC2_HUMAN	450	15	3.33333	52	11.5556	41	9.11111	93	20.6667	66	14.6667	54	12
Q9NXR5	ANR10_HUMAN	420	14	3.33333	24	5.71429	21	5	45	10.7143	37	8.80952	35	8.33333
A8MUP2	CSKMT_HUMAN	240	8	3.33333	13	5.41667	20	8.33333	33	13.75	20	8.33333	28	11.6667
O15467	CCL16_HUMAN	120	4	3.33333	16	13.3333	7	5.83333	23	19.1667	20	16.6667	11	9.16667
Q6ZNE9	RUFY4_HUMAN	571	19	3.3275	77	13.4851	27	4.72855	104	18.2137	93	16.2872	45	7.88091
Q6IE81	JADE1_HUMAN	842	28	3.32542	118	14.0143	55	6.53207	173	20.5463	141	16.7458	81	9.61995
O14595	CTDS2_HUMAN	271	9	3.32103	26	9.5941	25	9.22509	51	18.8192	34	12.5461	33	12.1771
Q96B02	UBE2W_HUMAN	151	5	3.31126	15	9.93377	14	9.27152	29	19.2053	20	13.245	19	12.5828
P23409	MYF6_HUMAN	242	8	3.30579	30	12.3967	11	4.54545	41	16.9421	37	15.2893	19	7.85124
Q13309	SKP2_HUMAN	424	14	3.30189	41	9.66981	27	6.36792	68	16.0377	51	12.0283	40	9.43396
Q9ULL4	PLXB3_HUMAN	1909	63	3.30016	143	7.49083	119	6.23363	262	13.7245	200	10.4767	178	9.32425
Q9NR23	GDF3_HUMAN	364	12	3.2967	36	9.89011	37	10.1648	73	20.0549	47	12.9121	48	13.1868
Q9Y215	COLQ_HUMAN	455	15	3.2967	42	9.23077	24	5.27473	66	14.5055	55	12.0879	37	8.13187
Q9H977	WDR54_HUMAN	334	11	3.29341	20	5.98802	27	8.08383	47	14.0719	31	9.28144	36	10.7784
Q9NQC1	JADE2_HUMAN	790	26	3.29114	84	10.6329	39	4.93671	123	15.5696	107	13.5443	63	7.97468
Q9UHQ1	NARF_HUMAN	456	15	3.28947	57	12.5	34	7.45614	91	19.9561	70	15.3509	49	10.7456
Q969F9	HPS3_HUMAN	1004	33	3.28685	105	10.4582	81	8.06773	186	18.5259	134	13.3466	110	10.9562
Q969F1	TF3C6_HUMAN	213	7	3.28638	14	6.57277	10	4.69484	24	11.2676	18	8.4507	17	7.98122
O14618	CCS_HUMAN	274	9	3.28467	22	8.0292	8	2.91971	30	10.9489	30	10.9489	17	6.20438
Q13216	ERCC8_HUMAN	396	13	3.28283	39	9.84848	34	8.58586	73	18.4343	52	13.1313	47	11.8687
Q96CC6	RHDF1_HUMAN	855	28	3.27485	101	11.8129	82	9.59064	183	21.4035	126	14.7368	107	12.5146
Q0VG99	MESP2_HUMAN	397	13	3.27456	30	7.55668	22	5.54156	52	13.0982	42	10.5793	34	8.56423
P28562	DUS1_HUMAN	367	12	3.26975	31	8.44687	28	7.62943	59	16.0763	43	11.7166	40	10.8992
O00168	PLM_HUMAN	92	3	3.26087	13	14.1304	7	7.6087	20	21.7391	14	15.2174	9	9.78261
Q86SJ2	AMGO2_HUMAN	522	17	3.2567	51	9.77011	43	8.23755	94	18.0077	66	12.6437	60	11.4943
O76075	DFFB_HUMAN	338	11	3.25444	49	14.497	30	8.87574	79	23.3728	60	17.7515	41	12.1302
Q8IWU4	ZNT8_HUMAN	369	12	3.25203	24	6.50407	30	8.13008	54	14.6341	35	9.48509	41	11.1111
Q8WXH6	RB40A_HUMAN	277	9	3.2491	36	12.9964	22	7.94224	58	20.9386	45	16.2455	30	10.8303
Q9Y625	GPC6_HUMAN	555	18	3.24324	55	9.90991	48	8.64865	103	18.5586	73	13.1532	63	11.3514
Q9NQC7	CYLD_HUMAN	956	31	3.24268	102	10.6695	82	8.57741	184	19.2469	132	13.8075	110	11.5063
Q3SXY7	LRIT3_HUMAN	679	22	3.24006	56	8.24742	47	6.92194	103	15.1694	76	11.1929	67	9.86745
P49189	AL9A1_HUMAN	494	16	3.23887	47	9.51417	41	8.2996	88	17.8138	62	12.5506	57	11.5385
P27539	GDF1_HUMAN	372	12	3.22581	36	9.67742	16	4.30108	52	13.9785	48	12.9032	27	7.25806
Q6DN72	FCRL6_HUMAN	434	14	3.22581	40	9.21659	29	6.68203	69	15.8986	51	11.7512	42	9.67742
Q96LB9	PGRP3_HUMAN	341	11	3.22581	19	5.57185	34	9.97067	53	15.5425	30	8.79765	43	12.61
Q9H0H3	KLH25_HUMAN	589	19	3.22581	62	10.5263	48	8.14941	110	18.6757	79	13.4126	67	11.3752
Q9UBH0	I36RA_HUMAN	155	5	3.22581	11	7.09677	14	9.03226	25	16.129	16	10.3226	19	12.2581
P24278	ZBT25_HUMAN	435	14	3.21839	40	9.1954	29	6.66667	69	15.8621	52	11.954	41	9.42529
O42043	ENK18_HUMAN	560	18	3.21429	46	8.21429	45	8.03571	91	16.25	62	11.0714	61	10.8929
Q9UNL4	ING4_HUMAN	249	8	3.21285	41	16.4659	19	7.63052	60	24.0964	47	18.8755	25	10.0402
Q0WX57	U17LO_HUMAN	530	17	3.20755	56	10.566	35	6.60377	91	17.1698	71	13.3962	52	9.81132
Q6FI81	CPIN1_HUMAN	312	10	3.20513	33	10.5769	12	3.84615	45	14.4231	42	13.4615	22	7.05128
Q6MZP7	LIN54_HUMAN	749	24	3.20427	61	8.14419	21	2.80374	82	10.9479	83	11.0814	42	5.60748
Q9NW38	FANCL_HUMAN	375	12	3.2	36	9.6	33	8.8	69	18.4	48	12.8	43	11.4667
Q96LJ7	DHRS1_HUMAN	313	10	3.19489	28	8.94569	22	7.02875	50	15.9744	37	11.8211	31	9.90415
Q96RW7	HMCN1_HUMAN	5635	180	3.19432	482	8.55368	343	6.08696	825	14.6406	650	11.535	516	9.15705
Q8WVZ7	RN133_HUMAN	376	12	3.19149	33	8.7766	30	7.97872	63	16.7553	44	11.7021	42	11.1702
Q9BYC8	RM32_HUMAN	188	6	3.19149	29	15.4255	13	6.91489	42	22.3404	34	18.0851	18	9.57447
O15466	SIA8E_HUMAN	376	12	3.19149	43	11.4362	51	13.5638	94	25	50	13.2979	63	16.7553
P50406	5HT6R_HUMAN	440	14	3.18182	29	6.59091	32	7.27273	61	13.8636	42	9.54545	44	10
O14843	FFAR3_HUMAN	346	11	3.17919	23	6.6474	42	12.1387	65	18.7861	34	9.82659	52	15.0289
P57075	UBS3A_HUMAN	661	21	3.177	68	10.2874	56	8.47201	124	18.7595	86	13.0106	75	11.3464
P30307	MPIP3_HUMAN	473	15	3.17125	58	12.2622	29	6.13108	87	18.3932	69	14.5877	43	9.09091
P17643	TYRP1_HUMAN	537	17	3.16574	44	8.19367	52	9.68343	96	17.8771	59	10.987	69	12.8492
P78543	BTG2_HUMAN	158	5	3.16456	15	9.49367	10	6.32911	25	15.8228	19	12.0253	15	9.49367
Q9UBL6	CPNE7_HUMAN	633	20	3.15956	66	10.4265	60	9.47867	126	19.9052	84	13.2701	80	12.6382
O60281	ZN292_HUMAN	2723	86	3.15828	310	11.3845	151	5.54535	461	16.9299	383	14.0654	231	8.48329
P41145	OPRK_HUMAN	380	12	3.15789	31	8.15789	40	10.5263	71	18.6842	42	11.0526	50	13.1579
O00154	BACH_HUMAN	380	12	3.15789	49	12.8947	18	4.73684	67	17.6316	60	15.7895	30	7.89474
Q53EP0	FND3B_HUMAN	1204	38	3.15615	99	8.22259	96	7.97342	195	16.196	136	11.2957	133	11.0465
O14524	NEMP1_HUMAN	444	14	3.15315	42	9.45946	52	11.7117	94	21.1712	54	12.1622	63	14.1892
Q9Y2M0	FAN1_HUMAN	1017	32	3.14651	127	12.4877	63	6.19469	190	18.6824	155	15.2409	94	9.24287
P0DMS8	AA3R_HUMAN	318	10	3.14465	24	7.54717	42	13.2075	66	20.7547	34	10.6918	52	16.3522
Q6NUI2	GPAT2_HUMAN	795	25	3.14465	66	8.30189	61	7.67296	127	15.9748	89	11.195	83	10.4403
P16473	TSHR_HUMAN	764	24	3.14136	67	8.76963	80	10.4712	147	19.2408	91	11.911	103	13.4817
Q14943	KI3S1_HUMAN	382	12	3.14136	38	9.94764	33	8.63874	71	18.5864	46	12.0419	44	11.5183
Q6UX15	LAYN_HUMAN	382	12	3.14136	38	9.94764	32	8.37696	70	18.3246	49	12.8272	44	11.5183
P78412	IRX6_HUMAN	446	14	3.13901	48	10.7623	28	6.27803	76	17.0404	62	13.9013	42	9.41704
Q96LT4	SAMD8_HUMAN	415	13	3.13253	36	8.6747	56	13.494	92	22.1687	48	11.5663	68	16.3855
P25929	NPY1R_HUMAN	384	12	3.125	31	8.07292	48	12.5	79	20.5729	43	11.1979	59	15.3646
Q15185	TEBP_HUMAN	160	5	3.125	20	12.5	15	9.375	35	21.875	25	15.625	19	11.875
Q9H063	MAF1_HUMAN	256	8	3.125	21	8.20312	26	10.1562	47	18.3594	28	10.9375	33	12.8906
Q9P2X3	IMPCT_HUMAN	320	10	3.125	39	12.1875	20	6.25	59	18.4375	49	15.3125	27	8.4375
Q9BSJ5	CQ080_HUMAN	609	19	3.11987	80	13.1363	28	4.5977	108	17.734	97	15.9278	45	7.38916
P06734	FCER2_HUMAN	321	10	3.11526	35	10.9034	23	7.16511	58	18.0685	43	13.3956	32	9.96885
Q9HCM2	PLXA4_HUMAN	1894	59	3.1151	196	10.3485	148	7.81415	344	18.1626	250	13.1996	202	10.6653
O60381	HBP1_HUMAN	514	16	3.11284	51	9.92218	40	7.7821	91	17.7043	66	12.8405	54	10.5058
Q8N680	ZBTB2_HUMAN	514	16	3.11284	43	8.36576	29	5.64202	72	14.0078	57	11.0895	44	8.56031
Q9UL25	RAB21_HUMAN	225	7	3.11111	29	12.8889	15	6.66667	44	19.5556	36	16	21	9.33333
Q14995	NR1D2_HUMAN	579	18	3.10881	62	10.7081	36	6.21762	98	16.9257	77	13.2988	54	9.32642
P32942	ICAM3_HUMAN	547	17	3.10786	42	7.67824	32	5.85009	74	13.5283	57	10.4205	47	8.59232
Q4G163	FBX43_HUMAN	708	22	3.10734	97	13.7006	39	5.50847	136	19.209	116	16.3842	59	8.33333
Q96DZ1	ERLEC_HUMAN	483	15	3.10559	52	10.766	39	8.07453	91	18.8406	65	13.4576	51	10.559
P37059	DHB2_HUMAN	387	12	3.10078	37	9.56072	42	10.8527	79	20.4134	49	12.6615	53	13.6951
Q6ZW61	BBS12_HUMAN	710	22	3.09859	53	7.46479	53	7.46479	106	14.9296	73	10.2817	74	10.4225
P17022	ZNF18_HUMAN	549	17	3.09654	56	10.2004	37	6.73953	93	16.9399	70	12.7505	53	9.65392
O95260	ATE1_HUMAN	518	16	3.0888	64	12.3552	51	9.84556	115	22.2008	77	14.8649	65	12.5483
Q6ICB4	SESQ2_HUMAN	259	8	3.0888	25	9.65251	20	7.72201	45	17.3745	30	11.583	28	10.8108
O00337	S28A1_HUMAN	649	20	3.08166	49	7.55008	68	10.4777	117	18.0277	69	10.6317	87	13.4052
Q01974	ROR2_HUMAN	943	29	3.07529	80	8.48356	69	7.31707	149	15.8006	108	11.4528	92	9.7561
Q9HAV4	XPO5_HUMAN	1204	37	3.07309	115	9.5515	90	7.47508	205	17.0266	149	12.3754	124	10.299
P36382	CXA5_HUMAN	358	11	3.07263	35	9.77654	34	9.49721	69	19.2737	44	12.2905	45	12.5698
C9JR72	KBTBD_HUMAN	458	14	3.05677	34	7.42358	42	9.17031	76	16.5939	48	10.4803	55	12.0087
Q63HQ2	EGFLA_HUMAN	1017	31	3.04818	97	9.53786	82	8.06293	179	17.6008	126	12.3894	110	10.8161
Q5NUL3	FFAR4_HUMAN	361	11	3.04709	35	9.69529	35	9.69529	70	19.3906	46	12.7424	44	12.1884
P11686	PSPC_HUMAN	197	6	3.04569	12	6.09137	11	5.58376	23	11.6751	18	9.13706	17	8.62944
Q8N448	LNX2_HUMAN	690	21	3.04348	63	9.13043	36	5.21739	99	14.3478	80	11.5942	55	7.97101
Q96FE7	P3IP1_HUMAN	263	8	3.04183	20	7.60456	16	6.08365	36	13.6882	26	9.88593	22	8.36502
Q8NB78	KDM1B_HUMAN	822	25	3.04136	94	11.4355	76	9.24574	170	20.6813	113	13.747	100	12.1655
Q99836	MYD88_HUMAN	296	9	3.04054	34	11.4865	21	7.09459	55	18.5811	42	14.1892	29	9.7973
O43868	S28A2_HUMAN	658	20	3.03951	48	7.29483	71	10.7903	119	18.0851	67	10.1824	90	13.6778
Q7Z3Q1	S46A3_HUMAN	461	14	3.03688	28	6.07375	69	14.9675	97	21.0412	41	8.89371	81	17.5705
A1A519	F170A_HUMAN	330	10	3.0303	38	11.5152	15	4.54545	53	16.0606	47	14.2424	24	7.27273
Q16617	NKG7_HUMAN	165	5	3.0303	2	1.21212	18	10.9091	20	12.1212	7	4.24242	22	13.3333
Q9H427	KCNKF_HUMAN	330	10	3.0303	35	10.6061	36	10.9091	71	21.5152	43	13.0303	43	13.0303
O94762	RECQ5_HUMAN	991	30	3.02725	129	13.0172	66	6.65994	195	19.6771	157	15.8426	91	9.18264
Q8WW22	DNJA4_HUMAN	397	12	3.02267	61	15.3652	21	5.28967	82	20.6549	69	17.3804	32	8.06045
Q92633	LPAR1_HUMAN	364	11	3.02198	27	7.41758	40	10.989	67	18.4066	38	10.4396	51	14.011
Q8IZF3	AGRF4_HUMAN	695	21	3.02158	70	10.0719	56	8.05755	126	18.1295	88	12.6619	77	11.0791
Q92752	TENR_HUMAN	1358	41	3.01915	97	7.14286	106	7.8056	203	14.9485	135	9.94109	145	10.6775
P58418	CLRN1_HUMAN	232	7	3.01724	16	6.89655	33	14.2241	49	21.1207	23	9.91379	38	16.3793
Q6S5L8	SHC4_HUMAN	630	19	3.01587	63	10	31	4.92063	94	14.9206	81	12.8571	47	7.46032
P31941	ABC3A_HUMAN	199	6	3.01508	19	9.54774	25	12.5628	44	22.1106	25	12.5628	31	15.5779
Q9H0A8	COMD4_HUMAN	199	6	3.01508	22	11.0553	10	5.02513	32	16.0804	27	13.5678	15	7.53769
O95361	TRI16_HUMAN	564	17	3.01418	62	10.9929	47	8.33333	109	19.3262	79	14.0071	59	10.461
Q9H3U5	MFSD1_HUMAN	465	14	3.01075	29	6.23656	57	12.2581	86	18.4946	43	9.24731	70	15.0538
Q86VV8	RTTN_HUMAN	2226	67	3.00988	184	8.26595	132	5.92992	316	14.1959	247	11.0961	195	8.76011
Q6PIU1	KCNV1_HUMAN	500	15	3	48	9.6	49	9.8	97	19.4	62	12.4	63	12.6
Q96GR4	ZDH12_HUMAN	267	8	2.99625	20	7.49064	31	11.6105	51	19.1011	26	9.73783	37	13.8577
Q13075	BIRC1_HUMAN	1403	42	2.99359	141	10.0499	127	9.05203	268	19.1019	179	12.7584	167	11.9031
Q96A59	MALD3_HUMAN	401	12	2.99252	55	13.7157	35	8.72818	90	22.4439	66	16.4589	47	11.7207
P78406	RAE1L_HUMAN	368	11	2.98913	35	9.51087	37	10.0543	72	19.5652	42	11.413	47	12.7717
O75159	SOCS5_HUMAN	536	16	2.98507	72	13.4328	40	7.46269	112	20.8955	84	15.6716	56	10.4478
Q8NCP5	ZBT44_HUMAN	570	17	2.98246	56	9.82456	38	6.66667	94	16.4912	69	12.1053	54	9.47368
Q7Z403	TMC6_HUMAN	805	24	2.98137	76	9.44099	71	8.81988	147	18.2609	99	12.2981	94	11.677
Q8NCU7	C2C4A_HUMAN	369	11	2.98103	60	16.2602	12	3.25203	72	19.5122	71	19.2412	18	4.87805
P49771	FLT3L_HUMAN	235	7	2.97872	17	7.23404	15	6.38298	32	13.617	22	9.3617	21	8.93617
Q7RTU4	BHA09_HUMAN	235	7	2.97872	33	14.0426	4	1.70213	37	15.7447	38	16.1702	11	4.68085
P17252	KPCA_HUMAN	672	20	2.97619	86	12.7976	68	10.119	154	22.9167	104	15.4762	85	12.6488
P21709	EPHA1_HUMAN	976	29	2.97131	90	9.22131	71	7.27459	161	16.4959	115	11.7828	100	10.2459
Q9NVP2	ASF1B_HUMAN	202	6	2.9703	11	5.44554	17	8.41584	28	13.8614	17	8.41584	23	11.3861
O15156	ZBT7B_HUMAN	539	16	2.96846	46	8.53432	26	4.82375	72	13.3581	62	11.5028	42	7.79221
Q92685	ALG3_HUMAN	438	13	2.96804	37	8.44749	61	13.9269	98	22.3744	50	11.4155	74	16.895
Q6UXD5	SE6L2_HUMAN	910	27	2.96703	52	5.71429	59	6.48352	111	12.1978	76	8.35165	85	9.34066
A5PLL7	PEDS1_HUMAN	270	8	2.96296	22	8.14815	29	10.7407	51	18.8889	30	11.1111	34	12.5926
Q3YBM2	T176B_HUMAN	270	8	2.96296	20	7.40741	18	6.66667	38	14.0741	28	10.3704	26	9.62963
O60284	ST18_HUMAN	1047	31	2.96084	121	11.5568	37	3.53391	158	15.0907	146	13.9446	67	6.39924
Q5I7T1	AG10B_HUMAN	473	14	2.95983	37	7.82241	91	19.2389	128	27.0613	51	10.7822	99	20.9302
P29375	KDM5A_HUMAN	1690	50	2.95858	231	13.6686	114	6.74556	345	20.4142	278	16.4497	157	9.28994
Q86WU2	LDHD_HUMAN	507	15	2.95858	46	9.07298	28	5.52268	74	14.5957	60	11.8343	42	8.28402
Q6NSW7	NANP8_HUMAN	305	9	2.95082	23	7.54098	25	8.19672	48	15.7377	32	10.4918	33	10.8197
Q8NDV1	SIA7C_HUMAN	305	9	2.95082	38	12.459	41	13.4426	79	25.9016	47	15.4098	48	15.7377
Q9H9S0	NANOG_HUMAN	305	9	2.95082	24	7.86885	25	8.19672	49	16.0656	33	10.8197	33	10.8197
P15104	GLNA_HUMAN	373	11	2.94906	40	10.7239	37	9.91957	77	20.6434	49	13.1367	47	12.6005
Q96A83	COQA1_HUMAN	441	13	2.94785	36	8.16327	14	3.1746	50	11.3379	48	10.8844	26	5.89569
Q96BR9	ZBT8A_HUMAN	441	13	2.94785	57	12.9252	31	7.02948	88	19.9546	67	15.1927	42	9.52381
Q96HN2	SAHH3_HUMAN	611	18	2.94599	67	10.9656	36	5.89198	103	16.8576	84	13.748	51	8.34697
Q96F10	SAT2_HUMAN	170	5	2.94118	22	12.9412	20	11.7647	42	24.7059	27	15.8824	24	14.1176
Q96GM8	TOE1_HUMAN	510	15	2.94118	55	10.7843	38	7.45098	93	18.2353	68	13.3333	51	10
Q9H172	ABCG4_HUMAN	646	19	2.94118	61	9.44272	64	9.90712	125	19.3498	78	12.0743	80	12.3839
Q9H6Q4	CIAO3_HUMAN	476	14	2.94118	50	10.5042	38	7.98319	88	18.4874	63	13.2353	52	10.9244
P47871	GLR_HUMAN	477	14	2.93501	44	9.22432	56	11.74	100	20.9644	56	11.74	68	14.2558
P57678	GEMI4_HUMAN	1058	31	2.93006	99	9.35728	88	8.31758	187	17.6749	127	12.0038	117	11.0586
Q9H244	P2Y12_HUMAN	342	10	2.92398	38	11.1111	46	13.4503	84	24.5614	46	13.4503	56	16.3743
Q99988	GDF15_HUMAN	308	9	2.92208	35	11.3636	11	3.57143	46	14.9351	43	13.961	20	6.49351
Q9HAB3	S52A2_HUMAN	445	13	2.92135	16	3.59551	31	6.96629	47	10.5618	29	6.51685	43	9.66292
Q96RL1	UIMC1_HUMAN	719	21	2.92072	97	13.491	31	4.31154	128	17.8025	115	15.9944	50	6.9541
Q9Y3D3	RT16_HUMAN	137	4	2.91971	18	13.1387	7	5.10949	25	18.2482	21	15.3285	11	8.0292
Q8J025	APCD1_HUMAN	514	15	2.91829	51	9.92218	50	9.72763	101	19.6498	64	12.4514	65	12.6459
Q9BZW4	TM6S2_HUMAN	377	11	2.91777	22	5.83554	58	15.3846	80	21.2202	31	8.22281	68	18.0371
P59044	NLRP6_HUMAN	892	26	2.9148	113	12.6682	51	5.71749	164	18.3857	138	15.4709	74	8.29596
Q2QGD7	ZXDC_HUMAN	858	25	2.91375	75	8.74126	37	4.31235	112	13.0536	95	11.0723	62	7.22611
Q96IL0	COA8_HUMAN	206	6	2.91262	39	18.932	24	11.6505	63	30.5825	45	21.8447	29	14.0777
P21980	TGM2_HUMAN	687	20	2.91121	70	10.1892	59	8.58806	129	18.7773	88	12.8093	77	11.2082
F5H094	SO1BT_HUMAN	687	20	2.91121	63	9.17031	75	10.917	138	20.0873	82	11.936	93	13.5371
Q9N2K0	ENH1_HUMAN	584	17	2.91096	31	5.30822	48	8.21918	79	13.5274	47	8.04795	63	10.7877
Q08554	DSC1_HUMAN	894	26	2.90828	91	10.179	65	7.27069	156	17.4497	115	12.8635	88	9.8434
O96000	NDUBA_HUMAN	172	5	2.90698	29	16.8605	17	9.88372	46	26.7442	33	19.186	22	12.7907
Q96DX7	TRI44_HUMAN	344	10	2.90698	29	8.43023	12	3.48837	41	11.9186	38	11.0465	19	5.52326
Q9P121	NTRI_HUMAN	344	10	2.90698	33	9.59302	26	7.55814	59	17.1512	41	11.9186	35	10.1744
O15389	SIGL5_HUMAN	551	16	2.90381	46	8.34846	42	7.6225	88	15.971	61	11.0708	58	10.5263
Q9Y2C3	B3GT5_HUMAN	310	9	2.90323	39	12.5806	39	12.5806	78	25.1613	48	15.4839	46	14.8387
P07510	ACHG_HUMAN	517	15	2.90135	34	6.5764	44	8.51064	78	15.087	48	9.28433	56	10.8317
Q9HBG6	IF122_HUMAN	1241	36	2.90089	147	11.8453	123	9.91136	270	21.7566	179	14.4239	156	12.5705
O76093	FGF18_HUMAN	207	6	2.89855	35	16.9082	19	9.17874	54	26.087	41	19.8068	25	12.0773
Q68D06	SLN13_HUMAN	897	26	2.89855	98	10.9253	74	8.24972	172	19.175	122	13.6009	95	10.5909
P22105	TENX_HUMAN	4244	123	2.89821	374	8.81244	273	6.43261	647	15.2451	472	11.1216	395	9.30726
Q9Y6L6	SO1B1_HUMAN	691	20	2.89436	56	8.1042	80	11.5774	136	19.6816	76	10.9986	98	14.1823
Q86YC3	LRC33_HUMAN	692	20	2.89017	49	7.08092	48	6.93642	97	14.0173	68	9.82659	68	9.82659
P52739	ZN131_HUMAN	623	18	2.88925	68	10.9149	37	5.939	105	16.8539	83	13.3226	54	8.66774
Q9BXL6	CAR14_HUMAN	1004	29	2.88845	119	11.8526	47	4.68127	166	16.5339	143	14.243	75	7.47012
O15245	S22A1_HUMAN	554	16	2.88809	39	7.03971	57	10.2888	96	17.3285	54	9.74729	72	12.9964
P98066	TSG6_HUMAN	277	8	2.88809	29	10.4693	37	13.3574	66	23.8267	37	13.3574	43	15.5235
Q6NUI6	CHADL_HUMAN	762	22	2.88714	82	10.7612	27	3.54331	109	14.3045	102	13.3858	48	6.29921
Q8IX07	FOG1_HUMAN	1006	29	2.8827	92	9.14513	40	3.97614	132	13.1213	121	12.0278	62	6.16302
A4D126	ISPD_HUMAN	451	13	2.88248	42	9.31264	24	5.32151	66	14.6341	55	12.1951	35	7.76053
Q14CW9	AT7L3_HUMAN	347	10	2.88184	47	13.5447	22	6.34006	69	19.8847	54	15.562	31	8.93372
Q9UF11	PKHB1_HUMAN	243	7	2.88066	27	11.1111	25	10.2881	52	21.3992	33	13.5802	32	13.1687
A2RU30	TESP1_HUMAN	521	15	2.87908	58	11.1324	38	7.29367	96	18.4261	73	14.0115	50	9.59693
P08253	MMP2_HUMAN	660	19	2.87879	67	10.1515	83	12.5758	150	22.7273	85	12.8788	95	14.3939
Q8IUC8	GLT13_HUMAN	556	16	2.8777	71	12.7698	49	8.81295	120	21.5827	84	15.1079	64	11.5108
P51797	CLCN6_HUMAN	869	25	2.87687	77	8.86076	85	9.78136	162	18.6421	98	11.2773	107	12.313
Q99467	CD180_HUMAN	661	19	2.87443	42	6.35401	53	8.01815	95	14.3722	60	9.07716	71	10.7413
O00329	PK3CD_HUMAN	1044	30	2.87356	118	11.3027	86	8.23755	204	19.5402	147	14.0805	112	10.728
O95741	CPNE6_HUMAN	557	16	2.87253	52	9.33573	48	8.61759	100	17.9533	65	11.6697	64	11.4901
P43681	ACHA4_HUMAN	627	18	2.87081	56	8.93142	50	7.97448	106	16.9059	72	11.4833	66	10.5263
P19113	DCHS_HUMAN	662	19	2.87009	74	11.1782	55	8.30816	129	19.4864	93	14.0483	74	11.1782
Q9Y6X2	PIAS3_HUMAN	628	18	2.86624	55	8.75796	35	5.57325	90	14.3312	72	11.465	51	8.12102
P47211	GALR1_HUMAN	349	10	2.86533	31	8.88252	40	11.4613	71	20.3438	40	11.4613	47	13.467
Q8NBI3	DRAXI_HUMAN	349	10	2.86533	44	12.6074	14	4.01146	58	16.6189	51	14.6132	24	6.87679
Q96JI7	SPTCS_HUMAN	2443	70	2.86533	229	9.37372	210	8.59599	439	17.9697	287	11.7479	276	11.2976
Q96MB7	HARB1_HUMAN	349	10	2.86533	27	7.73639	27	7.73639	54	15.4728	35	10.0287	37	10.6017
Q70Z35	PREX2_HUMAN	1606	46	2.86426	202	12.5778	120	7.47198	322	20.0498	244	15.193	161	10.0249
Q96M02	CJ090_HUMAN	699	20	2.86123	98	14.02	28	4.00572	126	18.0258	116	16.5951	48	6.86695
Q6SJ93	F111B_HUMAN	734	21	2.86104	102	13.8965	66	8.99183	168	22.8883	120	16.3488	84	11.4441
O76074	PDE5A_HUMAN	875	25	2.85714	95	10.8571	66	7.54286	161	18.4	119	13.6	88	10.0571
P10632	CP2C8_HUMAN	490	14	2.85714	60	12.2449	45	9.18367	105	21.4286	74	15.102	59	12.0408
P31645	SC6A4_HUMAN	630	18	2.85714	39	6.19048	89	14.127	128	20.3175	57	9.04762	105	16.6667
P48039	MTR1A_HUMAN	350	10	2.85714	26	7.42857	43	12.2857	69	19.7143	36	10.2857	51	14.5714
Q16548	B2LA1_HUMAN	175	5	2.85714	19	10.8571	21	12	40	22.8571	24	13.7143	25	14.2857
Q9UKK6	NXT1_HUMAN	140	4	2.85714	12	8.57143	17	12.1429	29	20.7143	16	11.4286	21	15
Q12769	NU160_HUMAN	1436	41	2.85515	117	8.14763	121	8.42618	238	16.5738	155	10.7939	157	10.9331
P17405	ASM_HUMAN	631	18	2.85261	46	7.29002	60	9.50872	106	16.7987	63	9.98415	76	12.0444
Q8NEA9	GMCL2_HUMAN	526	15	2.85171	63	11.9772	53	10.076	116	22.0532	76	14.4487	64	12.1673
Q9BQS2	SYT15_HUMAN	421	12	2.85036	46	10.9264	32	7.60095	78	18.5273	57	13.5392	42	9.97625
Q70CQ2	UBP34_HUMAN	3546	101	2.84828	323	9.10886	283	7.98082	606	17.0897	416	11.7315	380	10.7163
Q7Z614	SNX20_HUMAN	316	9	2.8481	43	13.6076	22	6.96203	65	20.5696	50	15.8228	31	9.81013
O95352	ATG7_HUMAN	703	20	2.84495	65	9.24609	63	8.96159	128	18.2077	82	11.6643	81	11.522
O00161	SNP23_HUMAN	211	6	2.8436	27	12.7962	4	1.89573	31	14.6919	32	15.1659	10	4.73934
Q9BSE5	GDAH_HUMAN	352	10	2.84091	30	8.52273	18	5.11364	48	13.6364	39	11.0795	28	7.95455
Q5VTY9	HHAT_HUMAN	493	14	2.83976	31	6.28803	82	16.6329	113	22.9209	43	8.72211	92	18.6613
Q9UQK1	PPR3C_HUMAN	317	9	2.83912	33	10.4101	32	10.0946	65	20.5047	41	12.9338	40	12.6183
Q86Y39	NDUAB_HUMAN	141	4	2.83688	11	7.80142	16	11.3475	27	19.1489	15	10.6383	20	14.1844
Q9NYM4	GPR83_HUMAN	423	12	2.83688	36	8.51064	51	12.0567	87	20.5674	48	11.3475	61	14.4208
Q99615	DNJC7_HUMAN	494	14	2.83401	79	15.9919	51	10.3239	130	26.3158	92	18.6235	63	12.753
P51530	DNA2_HUMAN	1060	30	2.83019	126	11.8868	71	6.69811	197	18.5849	155	14.6226	96	9.0566
Q8WV16	DCAF4_HUMAN	495	14	2.82828	62	12.5253	40	8.08081	102	20.6061	74	14.9495	52	10.5051
Q04725	TLE2_HUMAN	743	21	2.82638	59	7.94078	43	5.78735	102	13.7281	79	10.6326	64	8.61373
Q9UF12	HYPDH_HUMAN	460	13	2.82609	48	10.4348	29	6.30435	77	16.7391	59	12.8261	42	9.13043
P63096	GNAI1_HUMAN	354	10	2.82486	48	13.5593	34	9.60452	82	23.1638	58	16.3842	43	12.1469
Q96FZ2	HMCES_HUMAN	354	10	2.82486	49	13.8418	31	8.75706	80	22.5989	57	16.1017	40	11.2994
Q15283	RASA2_HUMAN	850	24	2.82353	104	12.2353	75	8.82353	179	21.0588	126	14.8235	97	11.4118
Q14451	GRB7_HUMAN	532	15	2.81955	61	11.4662	38	7.14286	99	18.609	76	14.2857	50	9.3985
P49238	CX3C1_HUMAN	355	10	2.8169	26	7.32394	50	14.0845	76	21.4085	35	9.85915	59	16.6197
Q3MUY2	PIGY_HUMAN	71	2	2.8169	2	2.8169	11	15.493	13	18.3099	4	5.6338	13	18.3099
Q9NQR9	G6PC2_HUMAN	355	10	2.8169	20	5.6338	51	14.3662	71	20	30	8.4507	59	16.6197
Q9UHW5	GPN3_HUMAN	284	8	2.8169	24	8.4507	31	10.9155	55	19.3662	32	11.2676	37	13.0282
O14735	CDIPT_HUMAN	213	6	2.8169	14	6.57277	24	11.2676	38	17.8404	19	8.92019	29	13.615
O60729	CC14B_HUMAN	498	14	2.81124	68	13.6546	52	10.4418	120	24.0964	81	16.2651	64	12.8514
Q92185	SIA8A_HUMAN	356	10	2.80899	39	10.9551	40	11.236	79	22.191	47	13.2022	50	14.0449
A6QL63	ABTB3_HUMAN	1104	31	2.80797	100	9.05797	69	6.25	169	15.308	129	11.6848	98	8.87681
O14772	FPGT_HUMAN	607	17	2.80066	62	10.2142	59	9.71993	121	19.9341	77	12.6853	75	12.3558
Q9UMN6	KMT2B_HUMAN	2715	76	2.79926	324	11.9337	125	4.60405	449	16.5378	384	14.1436	193	7.10866
Q6XUX3	DUSTY_HUMAN	929	26	2.79871	104	11.1948	61	6.5662	165	17.761	125	13.4553	86	9.25727
Q8TAT6	NPL4_HUMAN	608	17	2.79605	61	10.0329	53	8.71711	114	18.75	76	12.5	70	11.5132
Q9GZX6	IL22_HUMAN	179	5	2.7933	19	10.6145	11	6.14525	30	16.7598	23	12.8492	16	8.93855
Q9Y3E5	PTH2_HUMAN	179	5	2.7933	20	11.1732	8	4.46927	28	15.6425	25	13.9665	12	6.70391
Q9UIA0	CYH4_HUMAN	394	11	2.79188	54	13.7056	39	9.89848	93	23.6041	65	16.4975	48	12.1827
O60939	SCN2B_HUMAN	215	6	2.7907	24	11.1628	17	7.90698	41	19.0698	29	13.4884	23	10.6977
P67870	CSK2B_HUMAN	215	6	2.7907	17	7.90698	25	11.6279	42	19.5349	22	10.2326	26	12.093
P08172	ACM2_HUMAN	466	13	2.7897	42	9.01288	41	8.79828	83	17.8112	55	11.8026	52	11.1588
P17787	ACHB2_HUMAN	502	14	2.78884	47	9.36255	53	10.5578	100	19.9203	60	11.9522	67	13.3466
Q9BUB4	ADAT1_HUMAN	502	14	2.78884	62	12.3506	33	6.57371	95	18.9243	71	14.1434	47	9.36255
Q9GZV9	FGF23_HUMAN	251	7	2.78884	24	9.56175	22	8.76494	46	18.3267	31	12.3506	29	11.5538
O75558	STX11_HUMAN	287	8	2.78746	44	15.331	15	5.22648	59	20.5575	52	18.1185	22	7.66551
Q96NH3	BROMI_HUMAN	1257	35	2.78441	132	10.5012	116	9.22832	248	19.7295	166	13.206	147	11.6945
Q92854	SEM4D_HUMAN	862	24	2.78422	92	10.6729	82	9.51276	174	20.1856	112	12.993	103	11.949
P54315	LIPR1_HUMAN	467	13	2.78373	42	8.99358	47	10.0642	89	19.0578	54	11.5632	59	12.6338
P16615	AT2A2_HUMAN	1042	29	2.78311	97	9.30902	75	7.1977	172	16.5067	123	11.8042	103	9.88484
P28039	AOAH_HUMAN	575	16	2.78261	57	9.91304	49	8.52174	106	18.4348	73	12.6957	63	10.9565
Q9NSA2	KCND1_HUMAN	647	18	2.78207	71	10.9737	58	8.96445	129	19.9382	88	13.6012	75	11.592
Q7Z3Y9	K1C26_HUMAN	468	13	2.77778	46	9.82906	25	5.34188	71	15.1709	58	12.3932	35	7.47863
Q7Z4V0	ZN438_HUMAN	828	23	2.77778	102	12.3188	38	4.58937	140	16.9082	121	14.6135	59	7.1256
Q8IUH8	SPP2C_HUMAN	684	19	2.77778	47	6.87135	57	8.33333	104	15.2047	66	9.64912	72	10.5263
Q9Y2Y9	KLF13_HUMAN	288	8	2.77778	44	15.2778	14	4.86111	58	20.1389	51	17.7083	22	7.63889
P23458	JAK1_HUMAN	1154	32	2.77296	155	13.4315	101	8.75217	256	22.1837	182	15.7712	131	11.3518
P04201	MAS_HUMAN	325	9	2.76923	27	8.30769	43	13.2308	70	21.5385	34	10.4615	51	15.6923
Q9BQ69	MACD1_HUMAN	325	9	2.76923	47	14.4615	20	6.15385	67	20.6154	56	17.2308	28	8.61538
Q96MP8	KCTD7_HUMAN	289	8	2.76817	31	10.7266	29	10.0346	60	20.7612	38	13.1488	36	12.4567
Q8WTR2	DUS19_HUMAN	217	6	2.76498	22	10.1382	17	7.8341	39	17.9724	27	12.4424	23	10.5991
Q96K80	ZC3HA_HUMAN	434	12	2.76498	44	10.1382	20	4.60829	64	14.7465	54	12.4424	31	7.14286
Q13255	GRM1_HUMAN	1194	33	2.76382	110	9.21273	99	8.29146	209	17.5042	141	11.809	131	10.9715
P30542	AA1R_HUMAN	326	9	2.76074	25	7.66871	38	11.6564	63	19.3252	32	9.81595	45	13.8037
Q8WW24	TEKT4_HUMAN	435	12	2.75862	58	13.3333	22	5.05747	80	18.3908	68	15.6322	34	7.81609
Q9UPR3	SMG5_HUMAN	1016	28	2.75591	108	10.6299	69	6.79134	177	17.4213	130	12.7953	96	9.44882
Q9Y2P5	S27A5_HUMAN	690	19	2.75362	58	8.4058	56	8.11594	114	16.5217	75	10.8696	74	10.7246
Q9Y5U8	MPC1_HUMAN	109	3	2.75229	14	12.844	13	11.9266	27	24.7706	17	15.5963	16	14.6789
P28069	PIT1_HUMAN	291	8	2.74914	37	12.7148	19	6.52921	56	19.244	45	15.4639	26	8.93471
Q7L3V2	BOP_HUMAN	364	10	2.74725	23	6.31868	24	6.59341	47	12.9121	32	8.79121	32	8.79121
Q9NRG9	AAAS_HUMAN	546	15	2.74725	40	7.32601	42	7.69231	82	15.0183	52	9.52381	57	10.4396
Q8IXZ2	ZC3H3_HUMAN	948	26	2.74262	146	15.4008	38	4.00844	184	19.4093	168	17.7215	62	6.54008
P61952	GBG11_HUMAN	73	2	2.73973	14	19.1781	2	2.73973	16	21.9178	15	20.5479	4	5.47945
O75928	PIAS2_HUMAN	621	17	2.73752	58	9.33977	32	5.15298	90	14.4928	74	11.9163	47	7.56844
Q2TBA0	KLH40_HUMAN	621	17	2.73752	68	10.9501	53	8.53462	121	19.4847	81	13.0435	69	11.1111
P34995	PE2R1_HUMAN	402	11	2.73632	36	8.95522	25	6.21891	61	15.1741	46	11.4428	35	8.70647
Q9NWV8	BABA1_HUMAN	329	9	2.73556	25	7.59878	23	6.99088	48	14.5897	34	10.3343	32	9.72644
Q9UPX6	MNAR1_HUMAN	916	25	2.72926	117	12.7729	53	5.78603	170	18.559	138	15.0655	77	8.40611
O43474	KLF4_HUMAN	513	14	2.72904	44	8.577	29	5.65302	73	14.23	57	11.1111	43	8.38207
P50479	PDLI4_HUMAN	330	9	2.72727	32	9.69697	14	4.24242	46	13.9394	40	12.1212	22	6.66667
P52789	HXK2_HUMAN	917	25	2.72628	113	12.3228	60	6.54308	173	18.8659	137	14.94	85	9.26936
Q16637	SMN_HUMAN	294	8	2.72109	27	9.18367	19	6.46259	46	15.6463	33	11.2245	27	9.18367
Q14392	LRC32_HUMAN	662	18	2.71903	45	6.79758	30	4.53172	75	11.3293	63	9.51662	48	7.25076
Q8N4F4	S22AO_HUMAN	552	15	2.71739	44	7.97101	45	8.15217	89	16.1232	56	10.1449	58	10.5072
P53804	TTC3_HUMAN	2025	55	2.71605	266	13.1358	147	7.25926	413	20.3951	311	15.358	195	9.62963
Q1RMZ1	SAMTR_HUMAN	405	11	2.71605	48	11.8519	37	9.1358	85	20.9877	58	14.321	47	11.6049
Q14790	CASP8_HUMAN	479	13	2.71399	57	11.8998	38	7.93319	95	19.833	67	13.9875	50	10.4384
P54920	SNAA_HUMAN	295	8	2.71186	34	11.5254	28	9.49153	62	21.0169	41	13.8983	34	11.5254
Q9UK73	FEM1B_HUMAN	627	17	2.71132	63	10.0478	41	6.53907	104	16.5869	78	12.4402	57	9.09091
P31040	SDHA_HUMAN	664	18	2.71084	68	10.241	50	7.53012	118	17.7711	85	12.8012	68	10.241
Q86UT8	CATAC_HUMAN	332	9	2.71084	48	14.4578	26	7.83133	74	22.2892	55	16.5663	33	9.93976
Q9H2B4	S26A1_HUMAN	701	19	2.71041	57	8.13124	47	6.70471	104	14.8359	76	10.8417	65	9.27247
P31785	IL2RG_HUMAN	369	10	2.71003	26	7.04607	41	11.1111	67	18.1572	35	9.48509	51	13.8211
Q8TE99	PXYP1_HUMAN	480	13	2.70833	58	12.0833	45	9.375	103	21.4583	71	14.7917	53	11.0417
Q06203	PUR1_HUMAN	517	14	2.70793	55	10.6383	36	6.96325	91	17.6015	66	12.766	49	9.47776
A9UHW6	MI4GD_HUMAN	222	6	2.7027	24	10.8108	20	9.00901	44	19.8198	30	13.5135	26	11.7117
P25103	NK1R_HUMAN	407	11	2.7027	28	6.87961	54	13.2678	82	20.1474	38	9.33661	63	15.4791
Q8NB59	SYT14_HUMAN	555	15	2.7027	58	10.4505	46	8.28829	104	18.7387	69	12.4324	60	10.8108
Q9UF33	EPHA6_HUMAN	1036	28	2.7027	103	9.94208	96	9.26641	199	19.2085	125	12.0656	122	11.7761
Q7Z3Z4	PIWL4_HUMAN	852	23	2.69953	100	11.7371	72	8.4507	172	20.1878	121	14.2019	95	11.1502
Q9H8M7	MINY3_HUMAN	445	12	2.69663	36	8.08989	41	9.21348	77	17.3034	47	10.5618	50	11.236
O95622	ADCY5_HUMAN	1261	34	2.69627	122	9.67486	98	7.77161	220	17.4465	155	12.2918	130	10.3093
Q9BSH4	TACO1_HUMAN	297	8	2.6936	41	13.8047	11	3.7037	52	17.5084	47	15.8249	19	6.39731
O95544	NADK_HUMAN	446	12	2.69058	44	9.86547	31	6.95067	75	16.8161	56	12.5561	41	9.19283
P09936	UCHL1_HUMAN	223	6	2.69058	24	10.7623	14	6.27803	38	17.0404	29	13.0045	20	8.96861
Q8NAN2	MIGA1_HUMAN	632	17	2.68987	67	10.6013	58	9.17722	125	19.7785	84	13.2911	75	11.8671
O94768	ST17B_HUMAN	372	10	2.68817	35	9.4086	28	7.52688	63	16.9355	45	12.0968	38	10.2151
Q96RU8	TRIB1_HUMAN	372	10	2.68817	43	11.5591	25	6.72043	68	18.2796	50	13.4409	33	8.87097
Q9H9A5	CNO10_HUMAN	744	20	2.68817	75	10.0806	49	6.58602	124	16.6667	92	12.3656	68	9.13978
O15111	IKKA_HUMAN	745	20	2.68456	75	10.0671	52	6.97987	127	17.047	93	12.4832	70	9.39597
Q13133	NR1H3_HUMAN	447	12	2.68456	52	11.6331	27	6.04027	79	17.6734	62	13.8702	39	8.72483
Q5JUK3	KCNT1_HUMAN	1230	33	2.68293	127	10.3252	108	8.78049	235	19.1057	159	12.9268	138	11.2195
O95876	FRITZ_HUMAN	746	20	2.68097	86	11.5282	58	7.7748	144	19.3029	105	14.0751	75	10.0536
P47900	P2RY1_HUMAN	373	10	2.68097	35	9.38338	52	13.941	87	23.3244	44	11.7962	61	16.3539
A2A2Y4	FRMD3_HUMAN	597	16	2.68007	74	12.3953	56	9.38023	130	21.7755	88	14.7404	71	11.8928
O60942	MCE1_HUMAN	597	16	2.68007	79	13.2328	53	8.87772	132	22.1106	92	15.4104	67	11.2228
Q9ULL8	SHRM4_HUMAN	1493	40	2.67917	154	10.3148	76	5.09042	230	15.4052	191	12.793	113	7.56865
P17509	HXB6_HUMAN	224	6	2.67857	29	12.9464	24	10.7143	53	23.6607	34	15.1786	30	13.3929
Q8IYX1	TBC21_HUMAN	336	9	2.67857	35	10.4167	39	11.6071	74	22.0238	44	13.0952	46	13.6905
Q96EL3	RM53_HUMAN	112	3	2.67857	13	11.6071	5	4.46429	18	16.0714	16	14.2857	7	6.25
Q86U70	LDB1_HUMAN	411	11	2.6764	43	10.4623	37	9.00243	80	19.4647	53	12.8954	47	11.4355
Q2TAK8	PWP3A_HUMAN	710	19	2.67606	101	14.2254	35	4.92958	136	19.1549	119	16.7606	53	7.46479
Q13275	SEM3F_HUMAN	785	21	2.67516	89	11.3376	68	8.66242	157	20	108	13.758	87	11.0828
Q7L3B6	CD37L_HUMAN	337	9	2.67062	39	11.5727	30	8.90208	69	20.4748	47	13.9466	38	11.276
O60884	DNJA2_HUMAN	412	11	2.6699	55	13.3495	26	6.31068	81	19.6602	63	15.2913	37	8.98058
Q9NZP8	C1RL_HUMAN	487	13	2.6694	38	7.80287	43	8.82957	81	16.6324	51	10.4723	54	11.0883
P0DPH7	TBA3C_HUMAN	450	12	2.66667	39	8.66667	40	8.88889	79	17.5556	50	11.1111	50	11.1111
Q9BVJ7	DUS23_HUMAN	150	4	2.66667	16	10.6667	12	8	28	18.6667	20	13.3333	15	10
Q13449	LSAMP_HUMAN	338	9	2.66272	36	10.6509	19	5.6213	55	16.2722	42	12.426	28	8.28402
P68363	TBA1B_HUMAN	451	12	2.66075	39	8.64745	40	8.86918	79	17.5166	50	11.0865	50	11.0865
Q9BSI4	TINF2_HUMAN	451	12	2.66075	46	10.1996	23	5.09978	69	15.2993	57	12.6386	35	7.76053
P23193	TCEA1_HUMAN	301	8	2.65781	52	17.2757	12	3.98671	64	21.2625	58	19.2691	19	6.31229
Q9UI32	GLSL_HUMAN	602	16	2.65781	63	10.4651	46	7.6412	109	18.1063	77	12.7907	60	9.96678
O15484	CAN5_HUMAN	640	17	2.65625	78	12.1875	62	9.6875	140	21.875	93	14.5313	77	12.0312
O43914	TYOBP_HUMAN	113	3	2.65487	9	7.9646	6	5.30973	15	13.2743	12	10.6195	9	7.9646
Q6ZRQ5	MMS22_HUMAN	1243	33	2.65487	118	9.49316	124	9.97586	242	19.469	148	11.9067	155	12.4698
P49761	CLK3_HUMAN	490	13	2.65306	86	17.551	50	10.2041	136	27.7551	98	20	63	12.8571
Q969U7	PSMG2_HUMAN	264	7	2.65152	24	9.09091	24	9.09091	48	18.1818	30	11.3636	29	10.9848
Q9BZB8	CPEB1_HUMAN	566	15	2.65018	58	10.2473	41	7.24382	99	17.4912	71	12.5442	54	9.54064
Q5T9G4	ARM12_HUMAN	340	9	2.64706	37	10.8824	23	6.76471	60	17.6471	44	12.9412	32	9.41176
Q8N6U8	GP161_HUMAN	529	14	2.6465	48	9.07372	53	10.0189	101	19.0926	62	11.7202	65	12.2873
P01571	IFN17_HUMAN	189	5	2.6455	19	10.0529	17	8.99471	36	19.0476	24	12.6984	22	11.6402
Q6NW34	RMP64_HUMAN	567	15	2.6455	85	14.9912	35	6.17284	120	21.164	99	17.4603	48	8.46561
Q9HBY0	NOX3_HUMAN	568	15	2.64085	47	8.27465	78	13.7324	125	22.007	61	10.7394	91	16.0211
Q9UNE7	CHIP_HUMAN	303	8	2.64026	45	14.8515	21	6.93069	66	21.7822	53	17.4917	29	9.57096
Q9HC58	NCKX3_HUMAN	644	17	2.63975	56	8.69565	59	9.16149	115	17.8571	73	11.3354	75	11.646
Q69YH5	CDCA2_HUMAN	1023	27	2.6393	146	14.2717	44	4.30108	190	18.5728	170	16.6178	69	6.74487
Q8TC36	SUN5_HUMAN	379	10	2.63852	38	10.0264	31	8.17942	69	18.2058	47	12.4011	41	10.8179
Q9Y2C9	TLR6_HUMAN	796	21	2.63819	77	9.67337	75	9.42211	152	19.0955	94	11.809	95	11.9347
P05362	ICAM1_HUMAN	532	14	2.63158	49	9.21053	22	4.13534	71	13.3459	60	11.2782	36	6.76692
Q9P2Y4	ZN219_HUMAN	722	19	2.63158	77	10.6648	33	4.57064	110	15.2355	90	12.4654	49	6.7867
Q9Y678	COPG1_HUMAN	874	23	2.63158	92	10.5263	59	6.75057	151	17.2769	111	12.7002	80	9.15332
O00237	RN103_HUMAN	685	18	2.62774	66	9.63504	88	12.8467	154	22.4818	83	12.1168	104	15.1825
Q8IZC4	RTKN2_HUMAN	609	16	2.62726	78	12.8079	43	7.06076	121	19.8686	93	15.2709	56	9.1954
Q9Y6K9	NEMO_HUMAN	419	11	2.6253	60	14.3198	13	3.10263	73	17.4224	67	15.9905	23	5.48926
P26022	PTX3_HUMAN	381	10	2.62467	30	7.87402	26	6.82415	56	14.6982	40	10.4987	35	9.18635
Q9NUN7	ACER3_HUMAN	267	7	2.62172	21	7.86517	47	17.603	68	25.4682	28	10.4869	50	18.7266
Q969E2	SCAM4_HUMAN	229	6	2.62009	13	5.67686	39	17.0306	52	22.7074	19	8.29694	44	19.214
Q9H082	RB33B_HUMAN	229	6	2.62009	23	10.0437	18	7.86026	41	17.9039	28	12.2271	22	9.60699
Q9BZL6	KPCD2_HUMAN	878	23	2.61959	83	9.4533	56	6.37813	139	15.8314	102	11.6173	78	8.88383
Q9Y2C5	S17A4_HUMAN	497	13	2.61569	26	5.23139	58	11.67	84	16.9014	39	7.84708	68	13.6821
Q9BQT9	CSTN3_HUMAN	956	25	2.61506	79	8.2636	72	7.53138	151	15.795	103	10.7741	97	10.1464
P50897	PPT1_HUMAN	306	8	2.61438	27	8.82353	29	9.47712	56	18.3007	33	10.7843	37	12.0915
P53701	CCHL_HUMAN	268	7	2.61194	32	11.9403	27	10.0746	59	22.0149	38	14.1791	34	12.6866
P14174	MIF_HUMAN	115	3	2.6087	7	6.08696	10	8.69565	17	14.7826	10	8.69565	13	11.3043
P46597	ASMT_HUMAN	345	9	2.6087	30	8.69565	34	9.85507	64	18.5507	37	10.7246	43	12.4638
Q8IV61	GRP3_HUMAN	690	18	2.6087	75	10.8696	57	8.26087	132	19.1304	92	13.3333	72	10.4348
Q9H4Z2	ZN335_HUMAN	1342	35	2.60805	114	8.49478	61	4.54545	175	13.0402	141	10.5067	93	6.92996
P25874	UCP1_HUMAN	307	8	2.60586	29	9.44625	22	7.16612	51	16.6124	37	12.0521	29	9.44625
O60393	NOBOX_HUMAN	691	18	2.60492	58	8.39363	30	4.34153	88	12.7352	75	10.8538	46	6.65702
A7MCY6	TBKB1_HUMAN	615	16	2.60163	62	10.0813	26	4.22764	88	14.3089	77	12.5203	41	6.66667
O43827	ANGL7_HUMAN	346	9	2.60116	40	11.5607	39	11.2717	79	22.8324	48	13.8728	47	13.5838
P78357	CNTP1_HUMAN	1384	36	2.60116	117	8.45376	165	11.922	282	20.3757	147	10.6214	195	14.0896
Q8NCR0	B3GL2_HUMAN	500	13	2.6	45	9	48	9.6	93	18.6	56	11.2	61	12.2
Q12899	TRI26_HUMAN	539	14	2.5974	69	12.8015	40	7.42115	109	20.2226	82	15.2134	52	9.6475
Q9NYQ7	CELR3_HUMAN	3312	86	2.59662	284	8.57488	200	6.03865	484	14.6135	360	10.8696	280	8.45411
Q8N4A0	GALT4_HUMAN	578	15	2.59516	69	11.9377	61	10.5536	130	22.4913	83	14.3599	76	13.1488
Q9BS91	S35A5_HUMAN	424	11	2.59434	37	8.72642	57	13.4434	94	22.1698	48	11.3208	66	15.566
Q00G26	PLIN5_HUMAN	463	12	2.59179	45	9.71922	17	3.67171	62	13.3909	56	12.095	29	6.2635
Q8TBC4	UBA3_HUMAN	463	12	2.59179	43	9.28726	36	7.77538	79	17.0626	55	11.879	48	10.3672
Q9Y336	SIGL9_HUMAN	463	12	2.59179	34	7.34341	28	6.04752	62	13.3909	46	9.93521	39	8.42333
Q9NP94	S39A2_HUMAN	309	8	2.589	16	5.17799	28	9.06149	44	14.2395	24	7.76699	36	11.6505
Q68E01	INT3_HUMAN	1043	27	2.58869	108	10.3547	67	6.42378	175	16.7785	132	12.6558	90	8.62895
Q9HB19	PKHA2_HUMAN	425	11	2.58824	48	11.2941	33	7.76471	81	19.0588	57	13.4118	42	9.88235
O00482	NR5A2_HUMAN	541	14	2.5878	60	11.0906	41	7.57856	101	18.6691	71	13.1238	54	9.98152
P49821	NDUV1_HUMAN	464	12	2.58621	53	11.4224	35	7.5431	88	18.9655	65	14.0086	47	10.1293
Q5T2S8	ODAD2_HUMAN	1044	27	2.58621	133	12.7395	49	4.69349	182	17.433	154	14.751	76	7.27969
Q8NEZ4	KMT2C_HUMAN	4911	127	2.58603	471	9.59071	233	4.74445	704	14.3352	584	11.8917	344	7.00468
Q8IY95	TM192_HUMAN	271	7	2.58303	25	9.22509	18	6.64207	43	15.8672	31	11.4391	25	9.22509
Q9BWP8	COL11_HUMAN	271	7	2.58303	29	10.7011	15	5.53506	44	16.2362	36	13.2841	22	8.11808
Q8IXK2	GLT12_HUMAN	581	15	2.58176	72	12.3924	53	9.1222	125	21.5146	85	14.6299	67	11.5318
Q5SXH7	PKHS1_HUMAN	465	12	2.58065	47	10.1075	40	8.60215	87	18.7097	58	12.4731	48	10.3226
Q9BSA9	TM175_HUMAN	504	13	2.57937	36	7.14286	46	9.12698	82	16.2698	49	9.72222	57	11.3095
Q9NVV4	PAPD1_HUMAN	582	15	2.57732	71	12.1993	50	8.59107	121	20.7904	83	14.2612	64	10.9966
A4D1B5	GSAP_HUMAN	854	22	2.57611	79	9.25059	80	9.36768	159	18.6183	98	11.4754	101	11.8267
Q9Y216	MTMR7_HUMAN	660	17	2.57576	74	11.2121	60	9.09091	134	20.303	89	13.4848	76	11.5152
O14594	NCAN_HUMAN	1321	34	2.57381	105	7.94852	81	6.13172	186	14.0802	136	10.2952	111	8.40273
O15287	FANCG_HUMAN	622	16	2.57235	57	9.16399	35	5.62701	92	14.791	71	11.4148	50	8.03859
Q8N344	MIER2_HUMAN	545	14	2.56881	45	8.25688	33	6.05505	78	14.3119	56	10.2752	47	8.62385
P01597	KV139_HUMAN	117	3	2.5641	8	6.83761	11	9.40171	19	16.2393	10	8.54701	13	11.1111
P01764	HV323_HUMAN	117	3	2.5641	10	8.54701	14	11.9658	24	20.5128	13	11.1111	16	13.6752
P08887	IL6RA_HUMAN	468	12	2.5641	42	8.97436	37	7.90598	79	16.8803	53	11.3248	49	10.4701
Q05329	DCE2_HUMAN	585	15	2.5641	58	9.91453	56	9.57265	114	19.4872	71	12.1368	70	11.9658
Q96P11	NSUN5_HUMAN	429	11	2.5641	47	10.9557	25	5.82751	72	16.7832	58	13.5198	36	8.39161
Q9UFD9	RIM3A_HUMAN	1639	42	2.56254	188	11.4704	77	4.69799	265	16.1684	228	13.9109	119	7.26052
Q5VXU9	SHOC1_HUMAN	1444	37	2.56233	141	9.76454	122	8.44875	263	18.2133	175	12.1191	154	10.6648
O75132	ZBED4_HUMAN	1171	30	2.56191	128	10.9308	76	6.49018	204	17.421	155	13.2365	104	8.8813
Q96F86	EDC3_HUMAN	508	13	2.55906	49	9.64567	32	6.29921	81	15.9449	61	12.0079	44	8.66142
Q9BWF2	TRAIP_HUMAN	469	12	2.55864	69	14.7122	23	4.90405	92	19.6162	81	17.2708	34	7.24947
P54198	HIRA_HUMAN	1017	26	2.55654	106	10.4228	60	5.89971	166	16.3225	130	12.7827	84	8.25959
Q9UH77	KLHL3_HUMAN	587	15	2.55537	56	9.54003	44	7.49574	100	17.0358	70	11.925	58	9.88075
Q969R5	LMBL2_HUMAN	705	18	2.55319	87	12.3404	61	8.65248	148	20.9929	105	14.8936	71	10.0709
Q96P65	QRFPR_HUMAN	431	11	2.5522	49	11.3689	46	10.6729	95	22.0418	60	13.9211	55	12.761
Q99705	MCHR1_HUMAN	353	9	2.54958	23	6.51558	38	10.7649	61	17.2805	32	9.06516	46	13.0312
O95807	TM50A_HUMAN	157	4	2.54777	10	6.36943	25	15.9236	35	22.293	13	8.28025	29	18.4713
Q9NT62	ATG3_HUMAN	314	8	2.54777	30	9.55414	27	8.59873	57	18.1529	37	11.7834	35	11.1465
Q9H4Q3	PRD13_HUMAN	707	18	2.54597	71	10.0424	40	5.65771	111	15.7001	85	12.0226	55	7.77935
Q8N6C5	IGSF1_HUMAN	1336	34	2.54491	92	6.88623	124	9.28144	216	16.1677	120	8.98204	154	11.5269
Q8IVU3	HERC6_HUMAN	1022	26	2.54403	113	11.0568	83	8.12133	196	19.1781	137	13.4051	107	10.4697
Q96EB6	SIR1_HUMAN	747	19	2.54351	68	9.10308	38	5.08701	106	14.1901	84	11.245	57	7.63052
Q66K80	RUAS1_HUMAN	236	6	2.54237	22	9.32203	14	5.9322	36	15.2542	27	11.4407	19	8.05085
Q6UX27	VSTM1_HUMAN	236	6	2.54237	18	7.62712	16	6.77966	34	14.4068	22	9.32203	21	8.89831
Q9NQG7	HPS4_HUMAN	708	18	2.54237	53	7.48588	40	5.64972	93	13.1356	70	9.88701	57	8.05085
O95944	NCTR2_HUMAN	276	7	2.53623	22	7.97101	21	7.6087	43	15.5797	28	10.1449	25	9.05797
Q13485	SMAD4_HUMAN	552	14	2.53623	44	7.97101	33	5.97826	77	13.9493	55	9.96377	44	7.97101
O15194	CTDSL_HUMAN	276	7	2.53623	28	10.1449	25	9.05797	53	19.2029	34	12.3188	31	11.2319
Q9NVR2	INT10_HUMAN	710	18	2.53521	85	11.9718	62	8.73239	147	20.7042	101	14.2254	78	10.9859
O95497	VNN1_HUMAN	513	13	2.53411	34	6.62768	55	10.7212	89	17.3489	46	8.96686	68	13.2554
Q8NEZ3	WDR19_HUMAN	1342	34	2.53353	139	10.3577	120	8.94188	259	19.2996	170	12.6677	151	11.2519
Q70IA6	MOB2_HUMAN	237	6	2.53165	24	10.1266	25	10.5485	49	20.6751	29	12.2363	30	12.6582
Q9ULV4	COR1C_HUMAN	474	12	2.53165	59	12.4473	32	6.75105	91	19.1983	68	14.346	42	8.86076
Q12794	HYAL1_HUMAN	435	11	2.52874	29	6.66667	47	10.8046	76	17.4713	37	8.50575	56	12.8736
P14652	HXB2_HUMAN	356	9	2.52809	28	7.86517	20	5.61798	48	13.4831	37	10.3933	29	8.14607
O75828	CBR3_HUMAN	277	7	2.52708	34	12.2744	14	5.05415	48	17.3285	41	14.8014	21	7.58123
Q8WZ74	CTTB2_HUMAN	1663	42	2.52556	181	10.8839	69	4.14913	250	15.0331	222	13.3494	110	6.61455
O14508	SOCS2_HUMAN	198	5	2.52525	25	12.6263	17	8.58586	42	21.2121	28	14.1414	22	11.1111
Q92536	YLAT2_HUMAN	515	13	2.52427	28	5.43689	62	12.0388	90	17.4757	41	7.96117	73	14.1748
A8MYU2	KCNU1_HUMAN	1149	29	2.52393	112	9.74761	120	10.4439	232	20.1915	138	12.0104	144	12.5326
Q16363	LAMA4_HUMAN	1823	46	2.52331	192	10.5321	142	7.78936	334	18.3214	230	12.6166	186	10.203
Q96AQ7	CIDEC_HUMAN	238	6	2.52101	27	11.3445	19	7.98319	46	19.3277	33	13.8655	25	10.5042
Q96QF0	RAB3I_HUMAN	476	12	2.52101	57	11.9748	33	6.93277	90	18.9076	68	14.2857	44	9.2437
Q03112	MECOM_HUMAN	1230	31	2.52033	136	11.0569	82	6.66667	218	17.7236	161	13.0894	109	8.86179
O00411	RPOM_HUMAN	1230	31	2.52033	148	12.0325	76	6.17886	224	18.2114	177	14.3902	106	8.61789
A7XYQ1	SOBP_HUMAN	873	22	2.52005	77	8.82016	30	3.43643	107	12.2566	96	10.9966	48	5.49828
O15120	PLCB_HUMAN	278	7	2.51799	27	9.71223	26	9.35252	53	19.0647	33	11.8705	32	11.5108
Q14644	RASA3_HUMAN	834	21	2.51799	107	12.8297	86	10.3118	193	23.1415	127	15.2278	105	12.5899
O75618	DEDD_HUMAN	318	8	2.51572	48	15.0943	20	6.28931	68	21.3836	55	17.2956	27	8.49057
Q9H672	ASB7_HUMAN	318	8	2.51572	40	12.5786	21	6.60377	61	19.1824	47	14.7799	28	8.80503
Q2M385	MPEG1_HUMAN	716	18	2.51397	62	8.65922	63	8.79888	125	17.4581	77	10.7542	78	10.8939
Q5TIA1	MEI1_HUMAN	1274	32	2.51177	106	8.32025	81	6.35793	187	14.6782	134	10.5181	111	8.71272
Q96K78	AGRG7_HUMAN	797	20	2.50941	73	9.15935	72	9.03388	145	18.1932	89	11.1669	89	11.1669
Q9UHI7	S23A1_HUMAN	598	15	2.50836	37	6.18729	54	9.0301	91	15.2174	51	8.52843	68	11.3712
Q15746	MYLK_HUMAN	1914	48	2.50784	217	11.3375	105	5.48589	322	16.8234	263	13.7409	153	7.99373
O00624	NPT3_HUMAN	439	11	2.50569	23	5.23918	46	10.4784	69	15.7175	34	7.74487	56	12.7563
O75762	TRPA1_HUMAN	1119	28	2.50223	112	10.0089	96	8.57909	208	18.588	136	12.1537	119	10.6345
O00115	DNS2A_HUMAN	360	9	2.5	26	7.22222	38	10.5556	64	17.7778	35	9.72222	46	12.7778
O60519	CRBL2_HUMAN	120	3	2.5	27	22.5	5	4.16667	32	26.6667	30	25	7	5.83333
O60921	HUS1_HUMAN	280	7	2.5	31	11.0714	15	5.35714	46	16.4286	38	13.5714	21	7.5
P25025	CXCR2_HUMAN	360	9	2.5	30	8.33333	42	11.6667	72	20	39	10.8333	50	13.8889
P56975	NRG3_HUMAN	720	18	2.5	68	9.44444	43	5.97222	111	15.4167	83	11.5278	57	7.91667
Q96EE3	SEH1_HUMAN	360	9	2.5	36	10	29	8.05556	65	18.0556	44	12.2222	38	10.5556
Q96LW4	PRIPO_HUMAN	560	14	2.5	61	10.8929	60	10.7143	121	21.6071	74	13.2143	73	13.0357
A6NDG6	PGP_HUMAN	321	8	2.49221	33	10.2804	20	6.23053	53	16.5109	40	12.4611	27	8.41121
Q86W50	MET16_HUMAN	562	14	2.4911	75	13.3452	36	6.40569	111	19.7509	87	15.4804	48	8.54093
Q9P258	RCC2_HUMAN	522	13	2.49042	64	12.2605	36	6.89655	100	19.1571	75	14.3678	49	9.38697
Q6UWE0	LRSM1_HUMAN	723	18	2.48963	88	12.1715	25	3.45781	113	15.6293	105	14.5228	43	5.94744
Q4FZB7	KMT5B_HUMAN	885	22	2.48588	141	15.9322	49	5.53672	190	21.4689	160	18.0791	70	7.9096
Q96B96	LDAF1_HUMAN	161	4	2.48447	7	4.34783	16	9.93789	23	14.2857	11	6.8323	20	12.4224
P48728	GCST_HUMAN	403	10	2.48139	42	10.4218	20	4.96278	62	15.3846	51	12.6551	30	7.44417
Q9HBI6	CP4FB_HUMAN	524	13	2.48092	50	9.54198	51	9.73282	101	19.2748	60	11.4504	64	12.2137
P35573	GDE_HUMAN	1532	38	2.48042	160	10.4439	152	9.92167	312	20.3655	193	12.5979	184	12.0104
Q12947	FOXF2_HUMAN	444	11	2.47748	27	6.08108	34	7.65766	61	13.7387	37	8.33333	45	10.1351
P51946	CCNH_HUMAN	323	8	2.47678	42	13.0031	30	9.28793	72	22.291	48	14.8607	37	11.4551
Q15034	HERC3_HUMAN	1050	26	2.47619	85	8.09524	101	9.61905	186	17.7143	110	10.4762	126	12
Q496J9	SV2C_HUMAN	727	18	2.47593	63	8.66575	98	13.4801	161	22.1458	79	10.8666	115	15.8184
Q9BVI0	PHF20_HUMAN	1012	25	2.47036	144	14.2292	60	5.92885	204	20.1581	166	16.4032	83	8.20158
Q8NCW6	GLT11_HUMAN	608	15	2.46711	69	11.3487	58	9.53947	127	20.8882	82	13.4868	72	11.8421
Q14563	SEM3A_HUMAN	771	19	2.46433	94	12.192	77	9.98703	171	22.179	112	14.5266	94	12.192
Q9NR80	ARHG4_HUMAN	690	17	2.46377	85	12.3188	50	7.24638	135	19.5652	100	14.4928	65	9.42029
O14966	RAB7L_HUMAN	203	5	2.46305	24	11.8227	20	9.85222	44	21.6749	28	13.7931	25	12.3153
P35914	HMGCL_HUMAN	325	8	2.46154	32	9.84615	16	4.92308	48	14.7692	40	12.3077	24	7.38462
O75610	LFTY1_HUMAN	366	9	2.45902	40	10.929	23	6.28415	63	17.2131	47	12.8415	32	8.74317
P10721	KIT_HUMAN	976	24	2.45902	97	9.93852	93	9.52869	190	19.4672	119	12.1926	115	11.7828
Q01362	FCERB_HUMAN	244	6	2.45902	17	6.96721	20	8.19672	37	15.1639	22	9.01639	26	10.6557
Q6IQ22	RAB12_HUMAN	244	6	2.45902	36	14.7541	16	6.55738	52	21.3115	41	16.8033	20	8.19672
Q9GZU2	PEG3_HUMAN	1588	39	2.45592	197	12.4055	116	7.30479	313	19.7103	231	14.5466	155	9.76071
Q96PZ2	F111A_HUMAN	611	15	2.45499	87	14.239	53	8.6743	140	22.9133	98	16.0393	68	11.1293
P15260	INGR1_HUMAN	489	12	2.45399	38	7.77096	36	7.36196	74	15.1329	50	10.2249	46	9.40695
O00602	FCN1_HUMAN	326	8	2.45399	33	10.1227	32	9.81595	65	19.9387	41	12.5767	40	12.2699
Q9HAW9	UD18_HUMAN	530	13	2.45283	47	8.86792	57	10.7547	104	19.6226	58	10.9434	69	13.0189
O75344	FKBP6_HUMAN	327	8	2.44648	41	12.5382	31	9.48012	72	22.0183	48	14.6789	38	11.6208
P06126	CD1A_HUMAN	327	8	2.44648	23	7.03364	36	11.0092	59	18.0428	30	9.17431	42	12.844
A2RRP1	NBAS_HUMAN	2371	58	2.44623	245	10.3332	176	7.42303	421	17.7562	292	12.3155	231	9.74272
Q8N4J0	CARME_HUMAN	409	10	2.44499	43	10.5134	46	11.2469	89	21.7604	51	12.4694	56	13.6919
Q6ZMT4	KDM7A_HUMAN	941	23	2.44421	116	12.3273	72	7.65143	188	19.9787	135	14.3464	93	9.8831
Q9H270	VPS11_HUMAN	941	23	2.44421	109	11.5834	84	8.92667	193	20.5101	129	13.7088	106	11.2646
Q9ULI4	KI26A_HUMAN	1882	46	2.44421	189	10.0425	61	3.24123	250	13.2837	231	12.2742	106	5.63231
Q01968	OCRL_HUMAN	901	22	2.44173	107	11.8757	82	9.101	189	20.9767	125	13.8735	100	11.0988
O14926	FSCN2_HUMAN	492	12	2.43902	60	12.1951	48	9.7561	108	21.9512	71	14.4309	59	11.9919
P13473	LAMP2_HUMAN	410	10	2.43902	26	6.34146	40	9.7561	66	16.0976	35	8.53659	50	12.1951
P30968	GNRHR_HUMAN	328	8	2.43902	27	8.23171	47	14.3293	74	22.561	35	10.6707	55	16.7683
P84103	SRSF3_HUMAN	164	4	2.43902	43	26.2195	12	7.31707	55	33.5366	47	28.6585	16	9.7561
Q6IA17	SIGIR_HUMAN	410	10	2.43902	39	9.5122	34	8.29268	73	17.8049	47	11.4634	42	10.2439
Q8NAG6	ANKL1_HUMAN	615	15	2.43902	59	9.5935	27	4.39024	86	13.9837	72	11.7073	42	6.82927
Q5ZPR3	CD276_HUMAN	534	13	2.43446	31	5.80524	33	6.17978	64	11.985	43	8.05243	45	8.42697
O15127	SCAM2_HUMAN	329	8	2.43161	17	5.16717	44	13.3739	61	18.541	25	7.59878	50	15.1976
Q96JP0	FEM1C_HUMAN	617	15	2.43112	68	11.0211	37	5.99676	105	17.0178	82	13.2901	51	8.2658
P57088	TMM33_HUMAN	247	6	2.42915	21	8.50202	27	10.9312	48	19.4332	27	10.9312	31	12.5506
P02679	FIBG_HUMAN	453	11	2.42826	43	9.49227	54	11.9205	97	21.4128	53	11.6998	63	13.9073
O75191	XYLB_HUMAN	536	13	2.42537	41	7.64925	46	8.58209	87	16.2313	53	9.88806	58	10.8209
P13716	HEM2_HUMAN	330	8	2.42424	33	10	25	7.57576	58	17.5758	39	11.8182	33	10
Q6ZMJ2	SCAR5_HUMAN	495	12	2.42424	61	12.3232	22	4.44444	83	16.7677	72	14.5455	34	6.86869
Q8ND04	SMG8_HUMAN	991	24	2.4218	107	10.7972	72	7.26539	179	18.0626	129	13.0172	96	9.68718
O15391	TYY2_HUMAN	372	9	2.41935	35	9.4086	25	6.72043	60	16.129	44	11.828	33	8.87097
Q13867	BLMH_HUMAN	455	11	2.41758	50	10.989	49	10.7692	99	21.7582	58	12.7473	59	12.967
P16455	MGMT_HUMAN	207	5	2.41546	18	8.69565	11	5.31401	29	14.0097	23	11.1111	16	7.72947
Q60I27	AL2CL_HUMAN	953	23	2.41343	94	9.86359	76	7.97482	170	17.8384	114	11.9622	96	10.0735
O15131	IMA6_HUMAN	539	13	2.41187	52	9.6475	34	6.30798	86	15.9555	65	12.0594	46	8.53432
Q86VP1	TAXB1_HUMAN	789	19	2.40811	103	13.0545	55	6.97085	158	20.0253	118	14.9556	72	9.12548
Q8IXU6	S35F2_HUMAN	374	9	2.40642	25	6.68449	43	11.4973	68	18.1818	34	9.09091	49	13.1016
Q9Y365	STA10_HUMAN	291	7	2.4055	35	12.0275	23	7.90378	58	19.9313	40	13.7457	30	10.3093
Q09161	NCBP1_HUMAN	790	19	2.40506	88	11.1392	74	9.36709	162	20.5063	105	13.2911	92	11.6456
Q9H6E5	STPAP_HUMAN	874	21	2.40275	81	9.26773	41	4.69108	122	13.9588	99	11.3272	60	6.86499
P52799	EFNB2_HUMAN	333	8	2.4024	36	10.8108	27	8.10811	63	18.9189	43	12.9129	33	9.90991
Q86SQ9	DHDDS_HUMAN	333	8	2.4024	46	13.8138	28	8.40841	74	22.2222	51	15.3153	34	10.2102
Q969X2	SIA7F_HUMAN	333	8	2.4024	40	12.012	32	9.60961	72	21.6216	47	14.1141	39	11.7117
P28335	5HT2C_HUMAN	458	11	2.40175	45	9.82533	38	8.29694	83	18.1223	54	11.7904	47	10.262
P13164	IFM1_HUMAN	125	3	2.4	9	7.2	13	10.4	22	17.6	11	8.8	15	12
P80404	GABT_HUMAN	500	12	2.4	57	11.4	43	8.6	100	20	68	13.6	53	10.6
Q9BVX2	T106C_HUMAN	250	6	2.4	18	7.2	20	8	38	15.2	24	9.6	25	10
O95714	HERC2_HUMAN	4834	116	2.39967	473	9.78486	280	5.7923	753	15.5772	580	11.9983	386	7.98511
Q7Z3Y8	K1C27_HUMAN	459	11	2.39651	46	10.0218	22	4.79303	68	14.8148	57	12.4183	31	6.75381
Q9UKG4	S13A4_HUMAN	626	15	2.39617	43	6.86901	56	8.94569	99	15.8147	57	9.10543	71	11.3419
Q8IYD8	FANCM_HUMAN	2048	49	2.39258	235	11.4746	132	6.44531	367	17.9199	280	13.6719	175	8.54492
O60941	DTNB_HUMAN	627	15	2.39234	72	11.4833	35	5.58214	107	17.0654	84	13.3971	49	7.81499
Q9NPI9	KCJ16_HUMAN	418	10	2.39234	46	11.0048	47	11.244	93	22.2488	55	13.1579	56	13.3971
A8MTQ0	NOTO_HUMAN	251	6	2.39044	26	10.3586	16	6.3745	42	16.7331	32	12.749	22	8.76494
P51617	IRAK1_HUMAN	712	17	2.38764	56	7.86517	43	6.03933	99	13.9045	73	10.2528	56	7.86517
Q8IUC6	TCAM1_HUMAN	712	17	2.38764	46	6.46067	30	4.21348	76	10.6742	62	8.70787	46	6.46067
O00507	USP9Y_HUMAN	2555	61	2.38748	252	9.86301	221	8.64971	473	18.5127	305	11.9374	281	10.998
Q99706	KI2L4_HUMAN	377	9	2.38727	27	7.1618	32	8.48806	59	15.6499	33	8.75332	39	10.3448
Q5SWA1	PR15B_HUMAN	713	17	2.38429	61	8.5554	50	7.01262	111	15.568	78	10.9397	64	8.97616
P15514	AREG_HUMAN	252	6	2.38095	33	13.0952	16	6.34921	49	19.4444	37	14.6825	21	8.33333
Q6ZMS7	ZN783_HUMAN	546	13	2.38095	69	12.6374	28	5.12821	97	17.7656	82	15.0183	40	7.32601
Q8WU03	GLYL2_HUMAN	294	7	2.38095	33	11.2245	32	10.8844	65	22.1088	38	12.9252	38	12.9252
Q99496	RING2_HUMAN	336	8	2.38095	38	11.3095	16	4.7619	54	16.0714	46	13.6905	23	6.84524
Q9UIF7	MUTYH_HUMAN	546	13	2.38095	52	9.52381	32	5.86081	84	15.3846	65	11.9048	45	8.24176
O14920	IKKB_HUMAN	756	18	2.38095	83	10.9788	45	5.95238	128	16.9312	101	13.3598	61	8.06878
Q01118	SCN7A_HUMAN	1682	40	2.37812	169	10.0476	209	12.4257	378	22.4732	205	12.1879	246	14.6254
P42680	TEC_HUMAN	631	15	2.37718	89	14.1046	73	11.5689	162	25.6735	102	16.1648	86	13.6292
Q9UL41	PNMA3_HUMAN	463	11	2.37581	70	15.1188	27	5.83153	97	20.9503	80	17.2786	36	7.77538
O75648	MTU1_HUMAN	421	10	2.3753	51	12.114	43	10.2138	94	22.3278	61	14.4893	53	12.5891
A4GXA9	EME2_HUMAN	379	9	2.37467	38	10.0264	17	4.48549	55	14.5119	47	12.4011	25	6.59631
Q9BV23	ABHD6_HUMAN	337	8	2.37389	32	9.49555	30	8.90208	62	18.3976	40	11.8694	37	10.9792
Q9HAE3	CLXN_HUMAN	211	5	2.36967	27	12.7962	21	9.95261	48	22.7488	32	15.1659	25	11.8483
Q8IZP1	TBC3A_HUMAN	549	13	2.36794	75	13.6612	42	7.65027	117	21.3115	87	15.847	53	9.65392
Q9GZZ1	NAA50_HUMAN	169	4	2.36686	24	14.2012	15	8.87574	39	23.0769	28	16.568	19	11.2426
Q9H156	SLIK2_HUMAN	845	20	2.36686	79	9.34911	66	7.81065	145	17.1598	97	11.4793	85	10.0592
Q9NR21	PAR11_HUMAN	338	8	2.36686	38	11.2426	46	13.6095	84	24.8521	46	13.6095	52	15.3846
Q6PGP7	SKI3_HUMAN	1564	37	2.36573	179	11.445	123	7.86445	302	19.3095	212	13.555	155	9.91049
Q9NP91	S6A20_HUMAN	592	14	2.36486	34	5.74324	81	13.6824	115	19.4257	48	8.10811	94	15.8784
P29728	OAS2_HUMAN	719	17	2.36439	86	11.9611	75	10.4312	161	22.3922	101	14.0473	90	12.5174
P34949	MPI_HUMAN	423	10	2.36407	32	7.56501	29	6.85579	61	14.4208	42	9.92908	39	9.21986
Q9UNS2	CSN3_HUMAN	423	10	2.36407	36	8.51064	36	8.51064	72	17.0213	44	10.4019	46	10.8747
P61970	NTF2_HUMAN	127	3	2.3622	7	5.51181	14	11.0236	21	16.5354	10	7.87402	17	13.3858
O43548	TGM5_HUMAN	720	17	2.36111	63	8.75	68	9.44444	131	18.1944	79	10.9722	83	11.5278
P14784	IL2RB_HUMAN	551	13	2.35935	36	6.53358	48	8.71143	84	15.245	47	8.52995	60	10.8893
O95630	STABP_HUMAN	424	10	2.35849	48	11.3208	26	6.13208	74	17.4528	58	13.6792	34	8.01887
Q9HAT0	ROP1A_HUMAN	212	5	2.35849	21	9.90566	16	7.54717	37	17.4528	26	12.2642	21	9.90566
Q9UMX3	BOK_HUMAN	212	5	2.35849	25	11.7925	17	8.01887	42	19.8113	29	13.6792	22	10.3774
Q0VDF9	HSP7E_HUMAN	509	12	2.35756	54	10.609	25	4.91159	79	15.5206	63	12.3772	37	7.26916
Q9Y223	GLCNE_HUMAN	722	17	2.35457	74	10.2493	35	4.84765	109	15.097	91	12.6039	50	6.92521
Q96BD8	SKA1_HUMAN	255	6	2.35294	38	14.902	14	5.4902	52	20.3922	44	17.2549	20	7.84314
Q9UNA3	A4GCT_HUMAN	340	8	2.35294	31	9.11765	41	12.0588	72	21.1765	38	11.1765	47	13.8235
Q504T8	MIDN_HUMAN	468	11	2.35043	48	10.2564	14	2.99145	62	13.2479	57	12.1795	25	5.34188
P28340	DPOD1_HUMAN	1107	26	2.34869	127	11.4724	77	6.95574	204	18.4282	151	13.6405	101	9.12376
Q8IW19	APLF_HUMAN	511	12	2.34834	54	10.5675	24	4.69667	78	15.2642	66	12.9159	35	6.84932
Q9UM01	YLAT1_HUMAN	511	12	2.34834	28	5.47945	63	12.3288	91	17.8082	40	7.82779	74	14.4814
O94898	LRIG2_HUMAN	1065	25	2.34742	85	7.98122	73	6.85446	158	14.8357	110	10.3286	96	9.01408
Q92794	KAT6A_HUMAN	2004	47	2.34531	227	11.3273	99	4.94012	326	16.2675	270	13.4731	141	7.03593
Q5XKL5	BTBD8_HUMAN	1792	42	2.34375	210	11.7188	85	4.7433	295	16.4621	246	13.7277	125	6.97545
Q9UBR1	BUP1_HUMAN	384	9	2.34375	40	10.4167	35	9.11458	75	19.5312	49	12.7604	42	10.9375
Q8TCU3	S7A13_HUMAN	470	11	2.34043	31	6.59574	56	11.9149	87	18.5106	40	8.51064	67	14.2553
Q9H611	PIF1_HUMAN	641	15	2.34009	77	12.0125	28	4.36817	105	16.3807	87	13.5725	42	6.55226
A6NKB5	PCX2_HUMAN	2137	50	2.33973	187	8.75058	164	7.67431	351	16.4249	235	10.9967	204	9.54609
Q9UL18	AGO1_HUMAN	857	20	2.33372	98	11.4352	77	8.98483	175	20.4201	115	13.4189	94	10.9685
Q8TE02	ELP5_HUMAN	300	7	2.33333	21	7	18	6	39	13	28	9.33333	25	8.33333
Q8NFZ5	TNIP2_HUMAN	429	10	2.331	62	14.4522	12	2.7972	74	17.2494	71	16.5501	22	5.12821
Q9H3U1	UN45A_HUMAN	944	22	2.33051	109	11.5466	41	4.34322	150	15.8898	127	13.4534	63	6.67373
A6NGG8	PCARE_HUMAN	1288	30	2.32919	136	10.559	46	3.57143	182	14.1304	164	12.7329	73	5.6677
Q92833	JARD2_HUMAN	1246	29	2.32745	185	14.8475	61	4.89567	246	19.7432	212	17.0144	87	6.98234
P05813	CRBA1_HUMAN	215	5	2.32558	20	9.30233	26	12.093	46	21.3953	25	11.6279	30	13.9535
P49458	SRP09_HUMAN	86	2	2.32558	14	16.2791	7	8.13953	21	24.4186	16	18.6047	9	10.4651
O00750	P3C2B_HUMAN	1634	38	2.32558	181	11.0771	141	8.62913	322	19.7062	217	13.2803	175	10.7099
O14795	UN13B_HUMAN	1591	37	2.32558	183	11.5022	121	7.60528	304	19.1075	217	13.6392	154	9.67945
Q0IIM8	TBC8B_HUMAN	1120	26	2.32143	126	11.25	115	10.2679	241	21.5179	149	13.3036	139	12.4107
Q9BSW7	SYT17_HUMAN	474	11	2.32068	55	11.6034	37	7.80591	92	19.4093	65	13.7131	48	10.1266
P36959	GMPR1_HUMAN	345	8	2.31884	36	10.4348	24	6.95652	60	17.3913	44	12.7536	32	9.27536
O43439	MTG8R_HUMAN	604	14	2.31788	68	11.2583	29	4.80132	97	16.0596	81	13.4106	41	6.78808
Q16563	SYPL1_HUMAN	259	6	2.3166	18	6.94981	34	13.1274	52	20.0772	24	9.26641	39	15.0579
Q9Y4W2	LAS1L_HUMAN	734	17	2.31608	75	10.218	56	7.62943	131	17.8474	89	12.1253	71	9.67302
O43818	U3IP2_HUMAN	475	11	2.31579	61	12.8421	26	5.47368	87	18.3158	72	15.1579	37	7.78947
Q8TC07	TBC15_HUMAN	691	16	2.31548	75	10.8538	64	9.26194	139	20.1158	90	13.0246	75	10.8538
O95750	FGF19_HUMAN	216	5	2.31481	21	9.72222	18	8.33333	39	18.0556	26	12.037	23	10.6481
Q8NEK8	TET5D_HUMAN	389	9	2.31362	38	9.76864	35	8.99743	73	18.7661	47	12.0823	43	11.054
Q6PJT7	ZC3HE_HUMAN	736	17	2.30978	80	10.8696	41	5.57065	121	16.4402	94	12.7717	58	7.88043
B7U540	KCJ18_HUMAN	433	10	2.30947	44	10.1617	41	9.46882	85	19.6305	51	11.7783	50	11.5473
Q4U2R8	S22A6_HUMAN	563	13	2.30906	41	7.28242	49	8.70337	90	15.9858	53	9.41385	61	10.8348
P09912	IFI6_HUMAN	130	3	2.30769	7	5.38462	10	7.69231	17	13.0769	9	6.92308	13	10
Q6ZV73	FGD6_HUMAN	1430	33	2.30769	172	12.028	86	6.01399	258	18.042	200	13.986	118	8.25175
Q71F56	MD13L_HUMAN	2210	51	2.30769	172	7.78281	150	6.78733	322	14.5701	216	9.77376	197	8.91403
Q9P2E7	PCD10_HUMAN	1040	24	2.30769	81	7.78846	69	6.63462	150	14.4231	103	9.90385	92	8.84615
P30260	CDC27_HUMAN	824	19	2.30583	84	10.1942	67	8.13107	151	18.3252	102	12.3786	84	10.1942
A4D1S5	RAB19_HUMAN	217	5	2.30415	23	10.5991	20	9.21659	43	19.8157	27	12.4424	25	11.5207
Q08209	PP2BA_HUMAN	521	12	2.30326	56	10.7486	45	8.63724	101	19.3858	68	13.0518	57	10.9405
Q8NB14	UBP38_HUMAN	1042	24	2.30326	85	8.15739	82	7.86948	167	16.0269	108	10.3647	102	9.78887
Q08AM6	VAC14_HUMAN	782	18	2.30179	81	10.3581	55	7.03325	136	17.3913	99	12.6598	71	9.07928
O43172	PRP4_HUMAN	522	12	2.29885	65	12.4521	40	7.66284	105	20.1149	75	14.3678	50	9.57854
P12004	PCNA_HUMAN	261	6	2.29885	24	9.1954	16	6.13027	40	15.3257	28	10.728	22	8.42912
Q9HBW1	LRRC4_HUMAN	653	15	2.29709	47	7.19755	50	7.65697	97	14.8545	60	9.18836	65	9.95406
Q9H252	KCNH6_HUMAN	958	22	2.29645	83	8.66388	83	8.66388	166	17.3278	103	10.7516	102	10.6472
Q96DT7	ZBT10_HUMAN	871	20	2.29621	87	9.98852	51	5.85534	138	15.8439	105	12.0551	67	7.69231
Q2PPJ7	RGPA2_HUMAN	1873	43	2.29578	182	9.71703	150	8.00854	332	17.7256	220	11.7459	190	10.1442
O43526	KCNQ2_HUMAN	872	20	2.29358	107	12.2706	75	8.60092	182	20.8716	127	14.5642	94	10.7798
P20338	RAB4A_HUMAN	218	5	2.29358	26	11.9266	20	9.17431	46	21.1009	31	14.2202	25	11.4679
Q9NQR1	KMT5A_HUMAN	393	9	2.29008	66	16.7939	18	4.58015	84	21.374	71	18.0662	26	6.61578
O15243	OBRG_HUMAN	131	3	2.29008	7	5.34351	20	15.2672	27	20.6107	10	7.63359	23	17.5573
Q9NQ11	AT132_HUMAN	1180	27	2.28814	92	7.79661	82	6.94915	174	14.7458	118	10	103	8.72881
Q9NVH2	INT7_HUMAN	962	22	2.2869	90	9.35551	60	6.23701	150	15.5925	111	11.5385	82	8.52391
Q86X24	HORM1_HUMAN	394	9	2.28426	51	12.9442	27	6.85279	78	19.797	60	15.2284	36	9.13706
Q9BZG8	DPH1_HUMAN	438	10	2.28311	41	9.36073	29	6.621	70	15.9817	51	11.6438	39	8.90411
Q9UKK9	NUDT5_HUMAN	219	5	2.28311	19	8.6758	14	6.39269	33	15.0685	24	10.9589	18	8.21918
Q14289	FAK2_HUMAN	1009	23	2.27948	117	11.5956	75	7.4331	192	19.0287	136	13.4787	97	9.61348
Q8N8N7	PTGR2_HUMAN	351	8	2.2792	29	8.26211	24	6.83761	53	15.0997	35	9.97151	32	9.11681
Q8TEY5	CR3L4_HUMAN	395	9	2.27848	38	9.62025	17	4.3038	55	13.9241	47	11.8987	25	6.32911
P0DTE4	UD2A1_HUMAN	527	12	2.27704	53	10.0569	57	10.8159	110	20.8729	65	12.334	69	13.093
A6NNB3	IFM5_HUMAN	132	3	2.27273	14	10.6061	12	9.09091	26	19.697	16	12.1212	15	11.3636
O43155	FLRT2_HUMAN	660	15	2.27273	58	8.78788	48	7.27273	106	16.0606	72	10.9091	58	8.78788
Q9NZ01	TECR_HUMAN	308	7	2.27273	34	11.039	47	15.2597	81	26.2987	41	13.3117	54	17.5325
Q9P2D3	HTR5B_HUMAN	2071	47	2.26944	188	9.07774	103	4.97344	291	14.0512	226	10.9126	149	7.19459
Q9P2F6	RHG20_HUMAN	1191	27	2.267	138	11.5869	72	6.04534	210	17.6322	161	13.5181	99	8.31234
Q6IN84	MRM1_HUMAN	353	8	2.26629	35	9.91501	13	3.68272	48	13.5977	43	12.1813	21	5.94901
Q9NR09	BIRC6_HUMAN	4857	110	2.26477	387	7.96788	255	5.25015	642	13.218	491	10.1091	360	7.41198
Q8TBG9	SYNPR_HUMAN	265	6	2.26415	17	6.41509	37	13.9623	54	20.3774	22	8.30189	43	16.2264
Q9Y6C2	EMIL1_HUMAN	1016	23	2.26378	80	7.87402	36	3.54331	116	11.4173	101	9.94094	58	5.70866
Q9BRV3	SWET1_HUMAN	221	5	2.26244	15	6.78733	29	13.1222	44	19.9095	20	9.04977	31	14.0271
O60678	ANM3_HUMAN	531	12	2.25989	54	10.1695	49	9.22787	103	19.3974	66	12.4294	60	11.2994
P13866	SC5A1_HUMAN	664	15	2.25904	48	7.22892	73	10.994	121	18.2229	61	9.18675	84	12.6506
Q14515	SPRL1_HUMAN	664	15	2.25904	66	9.93976	32	4.81928	98	14.759	80	12.0482	47	7.07831
Q9H2H9	S38A1_HUMAN	487	11	2.25873	36	7.3922	55	11.2936	91	18.6858	46	9.44559	66	13.5524
O14975	S27A2_HUMAN	620	14	2.25806	74	11.9355	71	11.4516	145	23.3871	88	14.1935	84	13.5484
Q13042	CDC16_HUMAN	620	14	2.25806	67	10.8065	68	10.9677	135	21.7742	79	12.7419	81	13.0645
P0DPB6	RPAC2_HUMAN	133	3	2.25564	17	12.782	8	6.01504	25	18.797	20	15.0376	10	7.5188
Q0PNE2	ELP6_HUMAN	266	6	2.25564	23	8.64662	24	9.02256	47	17.6692	29	10.9023	28	10.5263
P50993	AT1A2_HUMAN	1020	23	2.2549	106	10.3922	71	6.96078	177	17.3529	126	12.3529	90	8.82353
Q86VW1	S22AG_HUMAN	577	13	2.25303	43	7.45234	77	13.3449	120	20.7972	55	9.53206	89	15.4246
P43629	KI3L1_HUMAN	444	10	2.25225	37	8.33333	35	7.88288	72	16.2162	44	9.90991	44	9.90991
Q7Z6J0	SH3R1_HUMAN	888	20	2.25225	75	8.44595	32	3.6036	107	12.0495	92	10.3604	51	5.74324
Q6IWH7	ANO7_HUMAN	933	21	2.2508	93	9.96785	110	11.7899	203	21.7578	114	12.2186	130	13.9335
Q86YW5	TRML1_HUMAN	311	7	2.2508	21	6.75241	12	3.85852	33	10.6109	28	9.00322	18	5.78778
O75019	LIRA1_HUMAN	489	11	2.24949	34	6.95297	40	8.17996	74	15.1329	41	8.38446	50	10.2249
Q9UJ83	HACL1_HUMAN	578	13	2.24913	49	8.47751	49	8.47751	98	16.955	61	10.5536	61	10.5536
Q6P2P2	ANM9_HUMAN	845	19	2.24852	69	8.16568	61	7.21893	130	15.3846	87	10.2959	80	9.46746
O95674	CDS2_HUMAN	445	10	2.24719	35	7.86517	70	15.7303	105	23.5955	43	9.66292	79	17.7528
Q3KRB8	RHGBB_HUMAN	267	6	2.24719	36	13.4831	20	7.49064	56	20.9738	42	15.7303	26	9.73783
Q96FJ2	DYL2_HUMAN	89	2	2.24719	12	13.4831	12	13.4831	24	26.9663	14	15.7303	14	15.7303
Q9NQX7	ITM2C_HUMAN	267	6	2.24719	32	11.985	26	9.73783	58	21.7228	36	13.4831	32	11.985
Q01201	RELB_HUMAN	579	13	2.24525	57	9.84456	31	5.35406	88	15.1986	70	12.0898	44	7.59931
Q8WV24	PHLA1_HUMAN	401	9	2.24439	47	11.7207	13	3.2419	60	14.9626	53	13.217	22	5.48628
Q9NT99	LRC4B_HUMAN	713	16	2.24404	57	7.99439	43	6.03086	100	14.0252	71	9.95792	59	8.27489
Q9BYX4	IFIH1_HUMAN	1025	23	2.2439	122	11.9024	69	6.73171	191	18.6341	142	13.8537	90	8.78049
Q99518	FMO2_HUMAN	535	12	2.24299	61	11.4019	55	10.2804	116	21.6822	71	13.271	65	12.1495
O94985	CSTN1_HUMAN	981	22	2.24261	85	8.66463	70	7.13558	155	15.8002	106	10.8053	92	9.37819
O15265	ATX7_HUMAN	892	20	2.24215	94	10.5381	28	3.13901	122	13.6771	112	12.5561	46	5.15695
Q8IZQ1	WDFY3_HUMAN	3526	79	2.2405	336	9.52921	278	7.88429	614	17.4135	406	11.5145	350	9.92626
P50895	BCAM_HUMAN	628	14	2.2293	55	8.75796	33	5.25478	88	14.0127	69	10.9873	46	7.32484
O60759	CYTIP_HUMAN	359	8	2.22841	41	11.4206	23	6.40669	64	17.8273	49	13.649	30	8.35655
Q7L513	FCRLA_HUMAN	359	8	2.22841	22	6.12813	26	7.24234	48	13.3705	29	8.07799	33	9.1922
P10909	CLUS_HUMAN	449	10	2.22717	56	12.4722	38	8.46325	94	20.9354	65	14.4766	48	10.6904
P41240	CSK_HUMAN	450	10	2.22222	54	12	39	8.66667	93	20.6667	63	14	48	10.6667
P57771	RGS8_HUMAN	180	4	2.22222	30	16.6667	16	8.88889	46	25.5556	34	18.8889	20	11.1111
Q8NET5	NFAM1_HUMAN	270	6	2.22222	24	8.88889	19	7.03704	43	15.9259	29	10.7407	24	8.88889
Q9H6B9	EPHX3_HUMAN	360	8	2.22222	29	8.05556	42	11.6667	71	19.7222	36	10	50	13.8889
P21359	NF1_HUMAN	2839	63	2.21909	286	10.074	206	7.25608	492	17.33	345	12.1522	265	9.33427
Q13882	PTK6_HUMAN	451	10	2.21729	52	11.5299	45	9.97783	97	21.5078	62	13.7472	54	11.9734
Q9H4B7	TBB1_HUMAN	451	10	2.21729	38	8.42572	36	7.98226	74	16.408	48	10.643	45	9.97783
O95373	IPO7_HUMAN	1038	23	2.2158	86	8.28516	87	8.3815	173	16.6667	107	10.3083	108	10.4046
P0C870	JMJD7_HUMAN	316	7	2.21519	23	7.27848	35	11.0759	58	18.3544	29	9.17722	41	12.9747
B6A8C7	TARM1_HUMAN	271	6	2.21402	21	7.74908	23	8.48708	44	16.2362	26	9.5941	29	10.7011
P26639	SYTC_HUMAN	723	16	2.213	94	13.0014	74	10.2351	168	23.2365	108	14.9378	89	12.3098
Q9Y6Y1	CMTA1_HUMAN	1673	37	2.2116	160	9.56366	107	6.3957	267	15.9594	190	11.3568	140	8.3682
Q00325	S25A3_HUMAN	362	8	2.20994	39	10.7735	43	11.8785	82	22.6519	46	12.7072	50	13.8122
Q9UIA9	XPO7_HUMAN	1087	24	2.20791	98	9.01564	95	8.73965	193	17.7553	118	10.8556	117	10.7636
O95153	RIMB1_HUMAN	1857	41	2.20786	189	10.1777	64	3.44642	253	13.6241	223	12.0086	102	5.49273
Q5T6F0	DCA12_HUMAN	453	10	2.20751	55	12.1413	42	9.27152	97	21.4128	64	14.128	51	11.2583
P47756	CAPZB_HUMAN	272	6	2.20588	37	13.6029	18	6.61765	55	20.2206	43	15.8088	24	8.82353
A2RUB1	MEIOC_HUMAN	952	21	2.20588	96	10.084	72	7.56303	168	17.6471	114	11.9748	88	9.2437
P15170	ERF3A_HUMAN	499	11	2.20441	61	12.2244	31	6.21242	92	18.4369	72	14.4289	41	8.21643
P27695	APEX1_HUMAN	318	7	2.20126	44	13.8365	27	8.49057	71	22.327	50	15.7233	34	10.6918
Q96EU7	C1GLC_HUMAN	318	7	2.20126	33	10.3774	35	11.0063	68	21.3836	39	12.2642	40	12.5786
Q8TB45	DPTOR_HUMAN	409	9	2.20049	55	13.4474	26	6.35697	81	19.8044	64	15.6479	34	8.31296
Q9UG56	PISD_HUMAN	409	9	2.20049	48	11.7359	43	10.5134	91	22.2494	56	13.6919	51	12.4694
Q5THR3	EFCB6_HUMAN	1501	33	2.19853	206	13.7242	136	9.06063	342	22.7848	238	15.8561	163	10.8594
P48506	GSH1_HUMAN	637	14	2.1978	72	11.303	55	8.63422	127	19.9372	83	13.0298	69	10.832
Q9BQ51	PD1L2_HUMAN	273	6	2.1978	24	8.79121	21	7.69231	45	16.4835	30	10.989	26	9.52381
Q13111	CAF1A_HUMAN	956	21	2.19665	146	15.272	42	4.39331	188	19.6653	167	17.4686	62	6.48536
Q9BTD3	TM121_HUMAN	319	7	2.19436	33	10.3448	28	8.77743	61	19.1223	40	12.5392	34	10.6583
P22307	SCP2_HUMAN	547	12	2.19378	56	10.2377	42	7.67824	98	17.9159	67	12.2486	54	9.87203
Q9H2J7	S6A15_HUMAN	730	16	2.19178	54	7.39726	87	11.9178	141	19.3151	69	9.45205	102	13.9726
Q9NZ09	UBAP1_HUMAN	502	11	2.19124	45	8.96414	27	5.37849	72	14.3426	56	11.1554	38	7.56972
P17050	NAGAB_HUMAN	411	9	2.18978	30	7.29927	38	9.24574	68	16.545	38	9.24574	47	11.4355
Q13698	CAC1S_HUMAN	1873	41	2.189	174	9.28991	196	10.4645	370	19.7544	208	11.1052	233	12.4399
Q9BTC8	MTA3_HUMAN	594	13	2.18855	73	12.2896	53	8.92256	126	21.2121	85	14.3098	66	11.1111
P50213	IDH3A_HUMAN	366	8	2.18579	38	10.3825	23	6.28415	61	16.6667	44	12.0219	31	8.46995
Q4KWH8	PLCH1_HUMAN	1693	37	2.18547	207	12.2268	109	6.43828	316	18.6651	242	14.2942	141	8.32841
Q9UJQ4	SALL4_HUMAN	1053	23	2.18424	90	8.54701	42	3.9886	132	12.5356	110	10.4463	64	6.07787
P40259	CD79B_HUMAN	229	5	2.18341	25	10.917	18	7.86026	43	18.7773	29	12.6638	22	9.60699
O95907	MOT3_HUMAN	504	11	2.18254	32	6.34921	39	7.7381	71	14.0873	42	8.33333	49	9.72222
Q8NEM7	SP20H_HUMAN	779	17	2.18228	73	9.37099	39	5.00642	112	14.3774	88	11.2965	56	7.1887
P19367	HXK1_HUMAN	917	20	2.18103	118	12.868	62	6.76118	180	19.6292	137	14.94	82	8.9422
Q5T2D2	TRML2_HUMAN	321	7	2.18069	34	10.5919	23	7.16511	57	17.757	40	12.4611	28	8.72274
Q13319	CD5R2_HUMAN	367	8	2.17984	43	11.7166	21	5.72207	64	17.4387	48	13.079	29	7.90191
Q687X5	STEA4_HUMAN	459	10	2.17865	47	10.2397	49	10.6754	96	20.915	57	12.4183	58	12.6362
P98194	AT2C1_HUMAN	919	20	2.17628	88	9.57563	57	6.20239	145	15.778	105	11.4255	75	8.16104
P18621	RL17_HUMAN	184	4	2.17391	39	21.1957	10	5.43478	49	26.6304	42	22.8261	14	7.6087
P33763	S10A5_HUMAN	92	2	2.17391	14	15.2174	8	8.69565	22	23.913	16	17.3913	10	10.8696
P78383	S35B1_HUMAN	322	7	2.17391	25	7.76398	39	12.1118	64	19.8758	32	9.93789	46	14.2857
Q8IY82	DRC7_HUMAN	874	19	2.17391	119	13.6156	77	8.81007	196	22.4256	137	15.6751	94	10.7551
Q8N9I5	FADS6_HUMAN	368	8	2.17391	30	8.15217	35	9.51087	65	17.663	38	10.3261	43	11.6848
Q96RJ3	TR13C_HUMAN	184	4	2.17391	17	9.23913	3	1.63043	20	10.8696	21	11.413	7	3.80435
O15067	PUR4_HUMAN	1338	29	2.16741	110	8.22123	86	6.4275	196	14.6487	136	10.1644	112	8.3707
Q5TA45	INT11_HUMAN	600	13	2.16667	69	11.5	48	8	117	19.5	80	13.3333	60	10
Q6R327	RICTR_HUMAN	1708	37	2.16628	188	11.007	106	6.20609	294	17.2131	221	12.9391	141	8.25527
P09603	CSF1_HUMAN	554	12	2.16606	41	7.40072	27	4.87365	68	12.2744	52	9.38628	38	6.85921
Q8N9M5	TM102_HUMAN	508	11	2.16535	37	7.28346	31	6.10236	68	13.3858	48	9.44882	41	8.07087
P56645	PER3_HUMAN	1201	26	2.16486	111	9.2423	74	6.16153	185	15.4038	134	11.1574	96	7.99334
Q9Y653	AGRG1_HUMAN	693	15	2.1645	53	7.64791	68	9.81241	121	17.4603	68	9.81241	80	11.544
Q9UQ05	KCNH4_HUMAN	1017	22	2.16323	93	9.14454	75	7.37463	168	16.5192	113	11.1111	92	9.04621
P47710	CASA1_HUMAN	185	4	2.16216	17	9.18919	11	5.94595	28	15.1351	20	10.8108	14	7.56757
Q15027	ACAP1_HUMAN	740	16	2.16216	89	12.027	39	5.27027	128	17.2973	105	14.1892	54	7.2973
Q9Y2J0	RP3A_HUMAN	694	15	2.16138	93	13.4006	36	5.18732	129	18.5879	105	15.1297	51	7.3487
P52952	NKX25_HUMAN	324	7	2.16049	36	11.1111	21	6.48148	57	17.5926	41	12.6543	28	8.64198
O75564	JERKY_HUMAN	556	12	2.15827	67	12.0504	45	8.09353	112	20.1439	76	13.6691	56	10.0719
Q9H9V9	JMJD4_HUMAN	417	9	2.15827	34	8.15348	52	12.47	86	20.6235	43	10.3118	61	14.6283
Q9P0R6	GSKIP_HUMAN	139	3	2.15827	12	8.63309	12	8.63309	24	17.2662	14	10.0719	14	10.0719
Q96H96	COQ2_HUMAN	371	8	2.15633	30	8.08625	37	9.97305	67	18.0593	38	10.2426	45	12.1294
Q86SR1	GLT10_HUMAN	603	13	2.15589	79	13.1012	59	9.78441	138	22.8856	92	15.257	71	11.7745
A0PK11	CLRN2_HUMAN	232	5	2.15517	16	6.89655	25	10.7759	41	17.6724	21	9.05172	30	12.931
O60235	TM11D_HUMAN	418	9	2.15311	35	8.37321	34	8.13397	69	16.5072	44	10.5263	43	10.2871
Q9NXR8	ING3_HUMAN	418	9	2.15311	46	11.0048	28	6.69856	74	17.7033	55	13.1579	35	8.37321
Q9UNP4	SIAT9_HUMAN	418	9	2.15311	53	12.6794	43	10.2871	96	22.9665	60	14.3541	52	12.4402
O75884	RBBP9_HUMAN	186	4	2.15054	18	9.67742	20	10.7527	38	20.4301	22	11.828	24	12.9032
P29371	NK3R_HUMAN	465	10	2.15054	40	8.60215	59	12.6882	99	21.2903	50	10.7527	65	13.9785
Q8WYJ6	SEPT1_HUMAN	372	8	2.15054	48	12.9032	23	6.1828	71	19.086	55	14.7849	31	8.33333
O15297	PPM1D_HUMAN	605	13	2.14876	76	12.562	30	4.95868	106	17.5207	88	14.5455	43	7.10744
P35858	ALS_HUMAN	605	13	2.14876	52	8.59504	38	6.28099	90	14.876	65	10.7438	50	8.26446
P17540	KCRS_HUMAN	419	9	2.14797	58	13.8425	30	7.1599	88	21.0024	67	15.9905	38	9.06921
Q9Y5Z7	HCFC2_HUMAN	792	17	2.14646	74	9.34343	65	8.20707	139	17.5505	89	11.2374	79	9.97475
Q8WXA3	RUFY2_HUMAN	606	13	2.14521	86	14.1914	24	3.9604	110	18.1518	97	16.0066	36	5.94059
P07737	PROF1_HUMAN	140	3	2.14286	15	10.7143	11	7.85714	26	18.5714	16	11.4286	14	10
Q96LJ8	UBX10_HUMAN	280	6	2.14286	33	11.7857	8	2.85714	41	14.6429	39	13.9286	14	5
O60315	ZEB2_HUMAN	1214	26	2.14168	138	11.3674	67	5.51895	205	16.8863	160	13.1796	90	7.41351
Q8TD43	TRPM4_HUMAN	1214	26	2.14168	123	10.1318	106	8.73147	229	18.8633	146	12.0264	131	10.7908
O60481	ZIC3_HUMAN	467	10	2.14133	40	8.56531	34	7.28051	74	15.8458	49	10.4925	44	9.42184
Q96JX3	SRAC1_HUMAN	654	14	2.14067	78	11.9266	49	7.49235	127	19.419	91	13.9144	60	9.17431
O75838	CIB2_HUMAN	187	4	2.13904	20	10.6952	21	11.2299	41	21.9251	24	12.8342	25	13.369
Q8IZR5	CKLF4_HUMAN	234	5	2.13675	19	8.11966	23	9.82906	42	17.9487	23	9.82906	28	11.9658
Q9BXW9	FACD2_HUMAN	1451	31	2.13646	152	10.4755	98	6.75396	250	17.2295	183	12.612	127	8.75258
A1L3X0	ELOV7_HUMAN	281	6	2.13523	27	9.60854	57	20.2847	84	29.8932	32	11.3879	63	22.4199
Q9NQW6	ANLN_HUMAN	1124	24	2.13523	145	12.9004	47	4.18149	192	17.0819	166	14.7687	68	6.04982
O00116	ADAS_HUMAN	658	14	2.12766	74	11.2462	56	8.51064	130	19.7568	87	13.2219	69	10.4863
Q8N3C7	CLIP4_HUMAN	705	15	2.12766	78	11.0638	48	6.80851	126	17.8723	90	12.766	62	8.79433
Q9NZE8	RM35_HUMAN	188	4	2.12766	39	20.7447	17	9.04255	56	29.7872	43	22.8723	20	10.6383
Q8NB16	MLKL_HUMAN	471	10	2.12314	76	16.1359	31	6.58174	107	22.7176	84	17.8344	39	8.28025
O95393	BMP10_HUMAN	424	9	2.12264	43	10.1415	34	8.01887	77	18.1604	52	12.2642	41	9.66981
P31276	HXC13_HUMAN	330	7	2.12121	34	10.303	24	7.27273	58	17.5758	41	12.4242	30	9.09091
Q8TDU6	GPBAR_HUMAN	330	7	2.12121	21	6.36364	27	8.18182	48	14.5455	27	8.18182	34	10.303
O15552	FFAR2_HUMAN	330	7	2.12121	28	8.48485	40	12.1212	68	20.6061	35	10.6061	45	13.6364
P09884	DPOLA_HUMAN	1462	31	2.12038	187	12.7907	120	8.20793	307	20.9986	215	14.7059	148	10.1231
Q99943	PLCA_HUMAN	283	6	2.12014	29	10.2473	27	9.54064	56	19.788	34	12.0141	31	10.9541
Q9Y277	VDAC3_HUMAN	283	6	2.12014	30	10.6007	32	11.3074	62	21.9081	36	12.7208	37	13.0742
P41091	IF2G_HUMAN	472	10	2.11864	53	11.2288	20	4.23729	73	15.4661	63	13.3475	30	6.35593
Q0VD86	INCA1_HUMAN	236	5	2.11864	25	10.5932	13	5.50847	38	16.1017	29	12.2881	18	7.62712
P32881	IFNA8_HUMAN	189	4	2.1164	21	11.1111	19	10.0529	40	21.164	25	13.2275	23	12.1693
Q5HYN5	CT451_HUMAN	189	4	2.1164	37	19.5767	10	5.29101	47	24.8677	39	20.6349	14	7.40741
Q9BYG0	B3GN5_HUMAN	378	8	2.1164	40	10.582	50	13.2275	90	23.8095	47	12.4339	56	14.8148
O95154	ARK73_HUMAN	331	7	2.1148	31	9.36556	33	9.96979	64	19.3353	38	11.4804	40	12.0846
O00273	DFFA_HUMAN	331	7	2.1148	35	10.574	12	3.62538	47	14.1994	42	12.6888	19	5.74018
O15269	SPTC1_HUMAN	473	10	2.11416	53	11.2051	37	7.82241	90	19.0275	61	12.8964	45	9.51374
O14813	PHX2A_HUMAN	284	6	2.11268	29	10.2113	21	7.39437	50	17.6056	34	11.9718	27	9.50704
P26885	FKBP2_HUMAN	142	3	2.11268	21	14.7887	9	6.33803	30	21.1268	24	16.9014	12	8.4507
Q9NPJ8	NXT2_HUMAN	142	3	2.11268	12	8.4507	18	12.6761	30	21.1268	15	10.5634	21	14.7887
Q9NX95	SYBU_HUMAN	663	14	2.11161	72	10.8597	25	3.77074	97	14.6305	85	12.8205	37	5.58069
Q5VWZ2	LYPL1_HUMAN	237	5	2.1097	23	9.70464	17	7.173	40	16.8776	27	11.3924	22	9.2827
Q9Y6D6	BIG1_HUMAN	1849	39	2.10925	183	9.89724	141	7.62574	324	17.523	214	11.5738	179	9.68091
O15554	KCNN4_HUMAN	427	9	2.10773	49	11.4754	31	7.25995	80	18.7354	57	13.3489	40	9.36768
Q6V0L0	CP26C_HUMAN	522	11	2.10728	58	11.1111	35	6.70498	93	17.8161	69	13.2184	45	8.62069
Q9Y5X5	NPFF2_HUMAN	522	11	2.10728	53	10.1533	57	10.9195	110	21.0728	64	12.2605	65	12.4521
Q9H2X9	S12A5_HUMAN	1139	24	2.10711	104	9.13082	93	8.16506	197	17.2959	127	11.1501	114	10.0088
Q86WT1	IT70A_HUMAN	665	14	2.10526	64	9.62406	66	9.92481	130	19.5489	77	11.5789	76	11.4286
Q02742	GCNT1_HUMAN	428	9	2.1028	54	12.6168	44	10.2804	98	22.8972	63	14.7196	52	12.1495
P29017	CD1C_HUMAN	333	7	2.1021	17	5.10511	39	11.7117	56	16.8168	24	7.20721	46	13.8138
O14827	RGRF2_HUMAN	1237	26	2.10186	152	12.2878	90	7.27567	242	19.5635	175	14.1471	116	9.37753
P0CG20	PRR35_HUMAN	571	12	2.10158	47	8.23117	19	3.3275	66	11.5587	57	9.98249	30	5.25394
Q8TF30	WHAMM_HUMAN	809	17	2.10136	112	13.8443	36	4.44994	148	18.2942	127	15.6984	53	6.5513
O14757	CHK1_HUMAN	476	10	2.10084	63	13.2353	42	8.82353	105	22.0588	73	15.3361	51	10.7143
P53618	COPB_HUMAN	953	20	2.09864	105	11.0178	54	5.66632	159	16.6842	123	12.9066	72	7.55509
P62266	RS23_HUMAN	143	3	2.0979	31	21.6783	8	5.59441	39	27.2727	32	22.3776	11	7.69231
Q6IQ26	DEN5A_HUMAN	1287	27	2.0979	143	11.1111	107	8.31391	250	19.425	167	12.9759	132	10.2564
Q8NF50	DOCK8_HUMAN	2099	44	2.09624	238	11.3387	174	8.28966	412	19.6284	278	13.2444	214	10.1953
Q9BT17	MTG1_HUMAN	334	7	2.09581	43	12.8743	14	4.19162	57	17.0659	50	14.9701	20	5.98802
Q9BXA5	SUCR1_HUMAN	334	7	2.09581	24	7.18563	51	15.2695	75	22.4551	31	9.28144	58	17.3653
Q8TC44	POC1B_HUMAN	478	10	2.09205	52	10.8787	41	8.57741	93	19.4561	61	12.7615	51	10.6695
P49639	HXA1_HUMAN	335	7	2.08955	29	8.65672	24	7.16418	53	15.8209	36	10.7463	31	9.25373
Q6UB28	MAP12_HUMAN	335	7	2.08955	27	8.0597	22	6.56716	49	14.6269	33	9.85075	29	8.65672
Q8TCX5	RHPN1_HUMAN	670	14	2.08955	69	10.2985	37	5.52239	106	15.8209	83	12.3881	50	7.46269
Q9BXX0	EMIL2_HUMAN	1053	22	2.08927	106	10.0665	56	5.31814	162	15.3846	127	12.0608	77	7.31244
P08922	ROS1_HUMAN	2347	49	2.08777	188	8.01023	245	10.4389	433	18.4491	233	9.92757	290	12.3562
Q6P4F1	OFUT3_HUMAN	479	10	2.08768	62	12.9436	58	12.1086	120	25.0522	72	15.0313	68	14.1962
Q15813	TBCE_HUMAN	527	11	2.08729	61	11.575	31	5.88235	92	17.4573	69	13.093	42	7.96964
P09038	FGF2_HUMAN	288	6	2.08333	51	17.7083	16	5.55556	67	23.2639	56	19.4444	21	7.29167
P51795	CLCN5_HUMAN	816	17	2.08333	69	8.45588	84	10.2941	153	18.75	85	10.4167	99	12.1324
Q14524	SCN5A_HUMAN	2016	42	2.08333	176	8.73016	207	10.2679	383	18.998	213	10.5655	244	12.1032
Q15818	NPTX1_HUMAN	432	9	2.08333	44	10.1852	27	6.25	71	16.4352	52	12.037	36	8.33333
Q496M5	PLK5_HUMAN	336	7	2.08333	21	6.25	21	6.25	42	12.5	28	8.33333	28	8.33333
Q9H9L7	AKIR1_HUMAN	192	4	2.08333	22	11.4583	15	7.8125	37	19.2708	25	13.0208	19	9.89583
P50748	KNTC1_HUMAN	2209	46	2.08239	226	10.2309	173	7.8316	399	18.0625	268	12.1322	212	9.5971
Q01668	CAC1D_HUMAN	2161	45	2.08237	217	10.0416	212	9.81027	429	19.8519	258	11.9389	255	11.8001
Q9C091	GRB1L_HUMAN	1923	40	2.08008	174	9.04836	138	7.17629	312	16.2246	210	10.9204	174	9.04836
P09769	FGR_HUMAN	529	11	2.0794	52	9.82987	54	10.2079	106	20.0378	63	11.9093	64	12.0983
P20061	TCO1_HUMAN	433	9	2.07852	30	6.92841	40	9.23788	70	16.1663	39	9.00693	49	11.3164
Q9UKA8	RCAN3_HUMAN	241	5	2.07469	23	9.54357	20	8.29876	43	17.8423	28	11.6183	25	10.3734
O60502	OGA_HUMAN	916	19	2.07424	88	9.60699	82	8.95197	170	18.559	106	11.5721	96	10.4803
Q9BY12	SCAPE_HUMAN	1400	29	2.07143	194	13.8571	70	5	264	18.8571	221	15.7857	97	6.92857
P09467	F16P1_HUMAN	338	7	2.07101	40	11.8343	24	7.10059	64	18.9349	47	13.9053	31	9.1716
Q9Y5Z9	UBIA1_HUMAN	338	7	2.07101	25	7.39645	35	10.355	60	17.7515	31	9.1716	42	12.426
Q14566	MCM6_HUMAN	821	17	2.07065	100	12.1803	55	6.69915	155	18.8794	115	14.0073	71	8.64799
Q14596	NBR1_HUMAN	966	20	2.07039	85	8.79917	50	5.17598	135	13.9752	105	10.8696	67	6.93582
O43913	ORC5_HUMAN	435	9	2.06897	48	11.0345	46	10.5747	94	21.6092	56	12.8736	54	12.4138
Q5JSP0	FGD3_HUMAN	725	15	2.06897	78	10.7586	34	4.68966	112	15.4483	92	12.6897	47	6.48276
Q9Y2B4	T53G5_HUMAN	290	6	2.06897	64	22.069	17	5.86207	81	27.931	68	23.4483	22	7.58621
A7E2V4	ZSWM8_HUMAN	1837	38	2.06859	153	8.3288	110	5.98802	263	14.3168	188	10.2341	144	7.83887
P19224	UD16_HUMAN	532	11	2.06767	56	10.5263	59	11.0902	115	21.6165	64	12.0301	69	12.9699
Q01740	FMO1_HUMAN	532	11	2.06767	50	9.3985	59	11.0902	109	20.4887	59	11.0902	69	12.9699
Q8N4E7	FTMT_HUMAN	242	5	2.06612	25	10.3306	19	7.85124	44	18.1818	29	11.9835	24	9.91736
Q9H7X0	NAA60_HUMAN	242	5	2.06612	23	9.50413	26	10.7438	49	20.2479	28	11.5702	31	12.8099
Q96PD2	DCBD2_HUMAN	775	16	2.06452	67	8.64516	63	8.12903	130	16.7742	82	10.5806	77	9.93548
Q56P42	PYDC2_HUMAN	97	2	2.06186	8	8.24742	6	6.18557	14	14.433	10	10.3093	8	8.24742
Q6UXZ3	CLM5_HUMAN	194	4	2.06186	17	8.76289	17	8.76289	34	17.5258	20	10.3093	19	9.79381
Q9H792	PEAK1_HUMAN	1746	36	2.06186	193	11.0538	93	5.32646	286	16.3803	226	12.9439	128	7.33104
Q9NVN8	GNL3L_HUMAN	582	12	2.06186	85	14.6048	29	4.98282	114	19.5876	94	16.1512	38	6.52921
O75815	BCAR3_HUMAN	825	17	2.06061	94	11.3939	50	6.06061	144	17.4545	109	13.2121	66	8
O15229	KMO_HUMAN	486	10	2.05761	54	11.1111	52	10.6996	106	21.8107	62	12.7572	62	12.7572
Q9Y4B6	DCAF1_HUMAN	1507	31	2.05707	140	9.28998	104	6.90113	244	16.1911	170	11.2807	134	8.89184
Q99447	PCY2_HUMAN	389	8	2.05656	47	12.0823	33	8.48329	80	20.5656	54	13.8817	39	10.0257
O15327	INP4B_HUMAN	924	19	2.05628	104	11.2554	62	6.70996	166	17.9654	121	13.0952	81	8.76623
Q9UPW8	UN13A_HUMAN	1703	35	2.0552	195	11.4504	136	7.98591	331	19.4363	227	13.3294	168	9.86494
Q8N556	AFAP1_HUMAN	730	15	2.05479	109	14.9315	34	4.65753	143	19.589	124	16.9863	47	6.43836
P57737	CORO7_HUMAN	925	19	2.05405	84	9.08108	55	5.94595	139	15.027	101	10.9189	72	7.78378
O94808	GFPT2_HUMAN	682	14	2.05279	86	12.61	49	7.18475	135	19.7947	98	14.3695	62	9.09091
Q9H3N8	HRH4_HUMAN	390	8	2.05128	37	9.48718	54	13.8462	91	23.3333	44	11.2821	61	15.641
Q16821	PPR3A_HUMAN	1122	23	2.04991	115	10.2496	72	6.41711	187	16.6667	136	12.1212	93	8.28877
Q8TF63	DCNP1_HUMAN	244	5	2.04918	26	10.6557	13	5.32787	39	15.9836	31	12.7049	18	7.37705
Q9NRF8	PYRG2_HUMAN	586	12	2.04778	63	10.7509	48	8.19113	111	18.942	75	12.7986	58	9.89761
Q9H040	SPRTN_HUMAN	489	10	2.04499	57	11.6564	36	7.36196	93	19.0184	66	13.4969	44	8.99796
Q9Y5Y9	SCNAA_HUMAN	1956	40	2.04499	179	9.15133	208	10.6339	387	19.7853	215	10.9918	244	12.4744
Q8IY21	DDX60_HUMAN	1712	35	2.04439	218	12.7336	165	9.63785	383	22.3715	248	14.486	197	11.507
Q86YA3	ZGRF1_HUMAN	2104	43	2.04373	221	10.5038	143	6.79658	364	17.3004	261	12.4049	183	8.69772
Q9C0D5	TANC1_HUMAN	1861	38	2.04191	190	10.2096	93	4.99731	283	15.2069	226	12.144	128	6.87802
P02745	C1QA_HUMAN	245	5	2.04082	24	9.79592	17	6.93878	41	16.7347	29	11.8367	21	8.57143
Q01813	PFKAP_HUMAN	784	16	2.04082	88	11.2245	55	7.01531	143	18.2398	103	13.1378	68	8.67347
Q99735	MGST2_HUMAN	147	3	2.04082	15	10.2041	22	14.966	37	25.1701	18	12.2449	25	17.0068
Q9NUT2	MITOS_HUMAN	735	15	2.04082	73	9.93197	49	6.66667	122	16.5986	87	11.8367	63	8.57143
Q76I76	SSH2_HUMAN	1423	29	2.03795	130	9.13563	69	4.84891	199	13.9845	158	11.1033	98	6.88686
Q9NRR4	RNC_HUMAN	1374	28	2.03785	170	12.3726	108	7.86026	278	20.2329	194	14.1194	135	9.82533
Q92900	RENT1_HUMAN	1129	23	2.0372	105	9.30027	84	7.44021	189	16.7405	125	11.0717	104	9.21169
Q9NQW1	SC31B_HUMAN	1179	24	2.03562	104	8.82103	68	5.7676	172	14.5886	125	10.6022	88	7.46395
Q8NBM4	UBAC2_HUMAN	344	7	2.03488	30	8.72093	41	11.9186	71	20.6395	37	10.7558	46	13.3721
Q9BQP7	MGME1_HUMAN	344	7	2.03488	39	11.3372	30	8.72093	69	20.0581	46	13.3721	37	10.7558
Q06495	NPT2A_HUMAN	639	13	2.03443	44	6.88576	43	6.72926	87	13.615	56	8.76369	55	8.6072
P25098	ARBK1_HUMAN	689	14	2.03193	94	13.643	62	8.99855	156	22.6415	106	15.3846	74	10.7402
Q92830	KAT2A_HUMAN	837	17	2.03106	105	12.5448	65	7.76583	170	20.3106	119	14.2174	79	9.43847
Q9ULT8	HECD1_HUMAN	2610	53	2.03065	274	10.4981	165	6.32184	439	16.8199	322	12.3372	213	8.16092
P17812	PYRG1_HUMAN	591	12	2.03046	65	10.9983	48	8.12183	113	19.1201	75	12.6904	58	9.81387
O15457	MSH4_HUMAN	936	19	2.02991	92	9.82906	75	8.01282	167	17.8419	109	11.6453	93	9.9359
Q9UMQ6	CAN11_HUMAN	739	15	2.02977	77	10.4195	79	10.6901	156	21.1096	91	12.3139	94	12.7199
P17676	CEBPB_HUMAN	345	7	2.02899	36	10.4348	22	6.37681	58	16.8116	43	12.4638	29	8.4058
Q3ZCM7	TBB8_HUMAN	444	9	2.02703	36	8.10811	40	9.00901	76	17.1171	45	10.1351	48	10.8108
Q9NZ81	PRR13_HUMAN	148	3	2.02703	13	8.78378	2	1.35135	15	10.1351	16	10.8108	5	3.37838
Q9HAS3	S28A3_HUMAN	691	14	2.02605	50	7.23589	80	11.5774	130	18.8133	64	9.26194	93	13.4588
P31948	STIP1_HUMAN	543	11	2.02578	87	16.0221	40	7.36648	127	23.3886	95	17.4954	51	9.39227
O15247	CLIC2_HUMAN	247	5	2.02429	32	12.9555	26	10.5263	58	23.4818	37	14.9798	30	12.1457
Q8NCM2	KCNH5_HUMAN	988	20	2.02429	111	11.2348	86	8.70445	197	19.9393	130	13.1579	103	10.4251
Q6ZSG1	ARK2C_HUMAN	346	7	2.02312	32	9.24855	20	5.78035	52	15.0289	37	10.6936	27	7.80347
Q9UPU5	UBP24_HUMAN	2620	53	2.0229	267	10.1908	212	8.0916	479	18.2824	312	11.9084	260	9.92366
Q7Z3S7	CA2D4_HUMAN	1137	23	2.02287	99	8.70712	104	9.14688	203	17.854	121	10.642	126	11.0818
O43521	B2L11_HUMAN	198	4	2.0202	19	9.59596	16	8.08081	35	17.6768	23	11.6162	20	10.101
O77932	DXO_HUMAN	396	8	2.0202	40	10.101	43	10.8586	83	20.9596	48	12.1212	49	12.3737
P13994	YJU2B_HUMAN	396	8	2.0202	61	15.404	22	5.55556	83	20.9596	67	16.9192	29	7.32323
P23921	RIR1_HUMAN	792	16	2.0202	89	11.2374	73	9.21717	162	20.4545	104	13.1313	89	11.2374
Q6ZNC8	MBOA1_HUMAN	495	10	2.0202	36	7.27273	73	14.7475	109	22.0202	45	9.09091	81	16.3636
Q9GZN1	ARP6_HUMAN	396	8	2.0202	39	9.84848	46	11.6162	85	21.4646	46	11.6162	52	13.1313
Q9P000	COMD9_HUMAN	198	4	2.0202	20	10.101	6	3.0303	26	13.1313	24	12.1212	10	5.05051
Q29RF7	PDS5A_HUMAN	1337	27	2.01945	170	12.715	79	5.90875	249	18.6238	195	14.5849	104	7.77861
Q9P2M1	LR2BP_HUMAN	347	7	2.01729	47	13.5447	43	12.3919	90	25.9366	52	14.9856	50	14.4092
Q8N7B6	PACRL_HUMAN	248	5	2.01613	34	13.7097	12	4.83871	46	18.5484	39	15.7258	16	6.45161
Q9UNX4	WDR3_HUMAN	943	19	2.01485	124	13.1495	72	7.63521	196	20.7847	142	15.0583	89	9.43796
Q86V42	F124A_HUMAN	546	11	2.01465	50	9.15751	39	7.14286	89	16.3004	60	10.989	46	8.42491
Q14667	BLTP2_HUMAN	2235	45	2.01342	228	10.2013	164	7.33781	392	17.5391	270	12.0805	205	9.17226
Q8WXA8	5HT3C_HUMAN	447	9	2.01342	29	6.4877	48	10.7383	77	17.226	37	8.2774	57	12.7517
Q96R06	SPAG5_HUMAN	1193	24	2.01174	121	10.1425	37	3.10142	158	13.2439	145	12.1542	60	5.02934
Q9UI47	CTNA3_HUMAN	895	18	2.01117	109	12.1788	33	3.68715	142	15.8659	125	13.9665	51	5.69832
Q8N126	CADM3_HUMAN	398	8	2.01005	32	8.0402	28	7.03518	60	15.0754	39	9.79899	36	9.04523
Q9NWT8	AKIP_HUMAN	199	4	2.01005	38	19.0955	11	5.52764	49	24.6231	41	20.603	15	7.53769
O00241	SIRB1_HUMAN	398	8	2.01005	32	8.0402	23	5.77889	55	13.8191	39	9.79899	30	7.53769
Q96QP1	ALPK1_HUMAN	1244	25	2.00965	123	9.88746	90	7.23473	213	17.1222	147	11.8167	115	9.24437
P60174	TPIS_HUMAN	249	5	2.00803	27	10.8434	17	6.82731	44	17.6707	32	12.8514	22	8.83534
Q8WWN8	ARAP3_HUMAN	1544	31	2.00777	154	9.97409	97	6.28238	251	16.2565	181	11.7228	124	8.03109
Q6P1W5	CA094_HUMAN	598	12	2.00669	56	9.36455	35	5.85284	91	15.2174	68	11.3712	47	7.85953
Q92600	CNOT9_HUMAN	299	6	2.00669	30	10.0334	17	5.68562	47	15.7191	35	11.7057	23	7.69231
Q5TDH0	DDI2_HUMAN	399	8	2.00501	39	9.77444	18	4.51128	57	14.2857	46	11.5288	25	6.26566
Q16878	CDO1_HUMAN	200	4	2	20	10	17	8.5	37	18.5	24	12	21	10.5
O14713	ITBP1_HUMAN	200	4	2	22	11	14	7	36	18	26	13	18	9
O94983	CMTA2_HUMAN	1202	24	1.99667	122	10.1498	76	6.3228	198	16.4725	139	11.5641	98	8.15308
Q9Y226	S22AD_HUMAN	551	11	1.99637	39	7.07804	57	10.3448	96	17.4229	49	8.89292	67	12.1597
O15488	GLYG2_HUMAN	501	10	1.99601	34	6.78643	39	7.78443	73	14.5709	43	8.58283	48	9.58084
P22455	FGFR4_HUMAN	802	16	1.99501	73	9.10224	53	6.60848	126	15.7107	87	10.8479	69	8.60349
A6NCS4	NKX26_HUMAN	301	6	1.99336	38	12.6246	18	5.98007	56	18.6047	43	14.2857	24	7.97342
Q9BQW3	COE4_HUMAN	602	12	1.99336	59	9.80066	44	7.30897	103	17.1096	69	11.4618	55	9.13621
Q9BZQ2	SHP1L_HUMAN	653	13	1.99081	77	11.7917	38	5.8193	115	17.611	89	13.6294	49	7.50383
O95294	RASL1_HUMAN	804	16	1.99005	96	11.9403	55	6.8408	151	18.7811	109	13.5572	70	8.70647
Q5UE93	PI3R6_HUMAN	754	15	1.98939	79	10.4775	45	5.96817	124	16.4456	93	12.3342	56	7.42706
O60938	KERA_HUMAN	352	7	1.98864	34	9.65909	29	8.23864	63	17.8977	41	11.6477	34	9.65909
Q0D2K3	RIPP1_HUMAN	151	3	1.98675	10	6.62252	8	5.29801	18	11.9205	13	8.60927	11	7.28477
Q9BRR3	PGAP4_HUMAN	403	8	1.98511	34	8.43672	48	11.9107	82	20.3474	42	10.4218	54	13.3995
P33981	TTK_HUMAN	857	17	1.98366	108	12.6021	57	6.65111	165	19.2532	124	14.4691	74	8.63477
Q9NWM0	SMOX_HUMAN	555	11	1.98198	50	9.00901	45	8.10811	95	17.1171	59	10.6306	56	10.0901
O95248	MTMR5_HUMAN	1868	37	1.98073	198	10.5996	134	7.17345	332	17.773	231	12.3662	165	8.83298
Q9GZZ9	UBA5_HUMAN	404	8	1.9802	37	9.15842	24	5.94059	61	15.099	44	10.8911	32	7.92079
P35670	ATP7B_HUMAN	1465	29	1.97952	120	8.19113	68	4.64164	188	12.8328	147	10.0341	95	6.48464
Q5J8X5	M4A13_HUMAN	152	3	1.97368	11	7.23684	22	14.4737	33	21.7105	14	9.21053	25	16.4474
Q7L190	DPPA4_HUMAN	304	6	1.97368	45	14.8026	11	3.61842	56	18.4211	50	16.4474	15	4.93421
P32246	CCR1_HUMAN	355	7	1.97183	31	8.73239	51	14.3662	82	23.0986	38	10.7042	58	16.338
Q93088	BHMT1_HUMAN	406	8	1.97044	47	11.5764	35	8.62069	82	20.197	55	13.5468	43	10.5911
Q9UQD0	SCN8A_HUMAN	1980	39	1.9697	202	10.202	225	11.3636	427	21.5657	237	11.9697	259	13.0808
Q12967	GNDS_HUMAN	914	18	1.96937	92	10.0656	59	6.45514	151	16.5208	108	11.8162	76	8.3151
Q86TI0	TBCD1_HUMAN	1168	23	1.96918	138	11.8151	77	6.59247	215	18.4075	159	13.613	97	8.30479
P01909	DQA1_HUMAN	254	5	1.9685	16	6.29921	21	8.26772	37	14.5669	21	8.26772	25	9.84252
P08637	FCG3A_HUMAN	254	5	1.9685	27	10.6299	31	12.2047	58	22.8346	29	11.4173	34	13.3858
Q9H7Z6	KAT8_HUMAN	458	9	1.96507	61	13.3188	47	10.262	108	23.5808	70	15.2838	54	11.7904
O00341	EAA5_HUMAN	560	11	1.96429	41	7.32143	37	6.60714	78	13.9286	51	9.10714	47	8.39286
Q96QB1	RHG07_HUMAN	1528	30	1.96335	180	11.7801	78	5.10471	258	16.8848	207	13.5471	108	7.06806
Q92636	FAN_HUMAN	917	18	1.96292	88	9.59651	86	9.37841	174	18.9749	105	11.4504	103	11.2323
O14933	UB2L6_HUMAN	153	3	1.96078	14	9.15033	11	7.18954	25	16.3399	17	11.1111	14	9.15033
P56381	ATP5E_HUMAN	51	1	1.96078	11	21.5686	5	9.80392	16	31.3725	12	23.5294	6	11.7647
P48547	KCNC1_HUMAN	511	10	1.95695	49	9.58904	61	11.9374	110	21.5264	59	11.546	68	13.3072
O75503	CLN5_HUMAN	358	7	1.95531	34	9.49721	56	15.6425	90	25.1397	41	11.4525	59	16.4804
Q9NPC1	LT4R2_HUMAN	358	7	1.95531	31	8.65922	29	8.10056	60	16.7598	37	10.3352	36	10.0559
Q8N612	FHI1B_HUMAN	972	19	1.95473	88	9.0535	54	5.55556	142	14.6091	105	10.8025	70	7.20165
Q15835	GRK1_HUMAN	563	11	1.95382	69	12.2558	58	10.302	127	22.5577	79	14.032	67	11.9005
O75072	FKTN_HUMAN	461	9	1.95228	57	12.3644	62	13.449	119	25.8134	66	14.3167	70	15.1844
P68036	UB2L3_HUMAN	154	3	1.94805	23	14.9351	12	7.79221	35	22.7273	25	16.2338	14	9.09091
Q96PC3	AP1S3_HUMAN	154	3	1.94805	22	14.2857	18	11.6883	40	25.974	25	16.2338	20	12.987
Q9Y227	ENTP4_HUMAN	616	12	1.94805	68	11.039	68	11.039	136	22.0779	80	12.987	77	12.5
A8MVW5	HECA2_HUMAN	462	9	1.94805	33	7.14286	42	9.09091	75	16.2338	42	9.09091	51	11.039
Q5H9R7	PP6R3_HUMAN	873	17	1.94731	73	8.36197	50	5.72738	123	14.0893	88	10.0802	66	7.56014
Q86WG5	MTMRD_HUMAN	1849	36	1.947	192	10.384	151	8.16658	343	18.5506	226	12.2228	183	9.89724
O95782	AP2A1_HUMAN	977	19	1.94473	102	10.4401	67	6.85773	169	17.2979	121	12.3849	86	8.80246
Q969U6	FBXW5_HUMAN	566	11	1.94346	51	9.0106	54	9.54064	105	18.5512	62	10.9541	65	11.4841
O14503	BHE40_HUMAN	412	8	1.94175	47	11.4078	19	4.61165	66	16.0194	54	13.1068	25	6.06796
O60682	MUSC_HUMAN	206	4	1.94175	28	13.5922	7	3.39806	35	16.9903	31	15.0485	11	5.33981
Q9C0A6	SETD5_HUMAN	1442	28	1.94175	160	11.0957	69	4.78502	229	15.8807	185	12.8294	95	6.58807
O14645	IDLC_HUMAN	258	5	1.93798	43	16.6667	9	3.48837	52	20.155	47	18.2171	14	5.42636
Q9HC35	EMAL4_HUMAN	981	19	1.9368	103	10.4995	68	6.9317	171	17.4312	120	12.2324	86	8.76656
Q86YT5	S13A5_HUMAN	568	11	1.93662	42	7.39437	61	10.7394	103	18.1338	52	9.15493	70	12.3239
O00462	MANBA_HUMAN	879	17	1.93402	69	7.84983	115	13.083	184	20.9329	85	9.67008	132	15.0171
Q9P2B2	FPRP_HUMAN	879	17	1.93402	91	10.3527	77	8.75995	168	19.1126	104	11.8316	88	10.0114
P55263	ADK_HUMAN	362	7	1.9337	42	11.6022	31	8.56354	73	20.1657	49	13.5359	38	10.4972
Q6UWP7	LCLT1_HUMAN	414	8	1.93237	47	11.3527	58	14.0097	105	25.3623	55	13.285	63	15.2174
A8K8P3	SFI1_HUMAN	1242	24	1.93237	206	16.5862	117	9.42029	323	26.0064	226	18.1965	138	11.1111
Q9NR82	KCNQ5_HUMAN	932	18	1.93133	112	12.0172	67	7.18884	179	19.206	130	13.9485	84	9.01288
Q9NZU1	FLRT1_HUMAN	674	13	1.92878	62	9.19881	41	6.08309	103	15.2819	74	10.9792	52	7.71513
Q8NHS9	SPT22_HUMAN	363	7	1.92837	47	12.9477	27	7.43802	74	20.3857	53	14.6006	34	9.36639
O94810	RGS11_HUMAN	467	9	1.92719	56	11.9914	41	8.77944	97	20.7709	65	13.9186	48	10.2784
P51813	BMX_HUMAN	675	13	1.92593	88	13.037	69	10.2222	157	23.2593	100	14.8148	81	12
O43264	ZW10_HUMAN	779	15	1.92555	90	11.5533	51	6.54685	141	18.1001	102	13.0937	65	8.34403
O14561	ACPM_HUMAN	156	3	1.92308	15	9.61538	10	6.41026	25	16.0256	18	11.5385	13	8.33333
P46695	IEX1_HUMAN	156	3	1.92308	14	8.97436	8	5.12821	22	14.1026	17	10.8974	10	6.41026
Q01581	HMCS1_HUMAN	520	10	1.92308	47	9.03846	45	8.65385	92	17.6923	56	10.7692	52	10
Q13158	FADD_HUMAN	208	4	1.92308	27	12.9808	8	3.84615	35	16.8269	31	14.9038	12	5.76923
Q8NHZ7	MB3L2_HUMAN	208	4	1.92308	37	17.7885	4	1.92308	41	19.7115	41	19.7115	8	3.84615
Q8TDB8	GTR14_HUMAN	520	10	1.92308	33	6.34615	51	9.80769	84	16.1538	43	8.26923	59	11.3462
Q8TEC5	SH3R2_HUMAN	729	14	1.92044	82	11.2483	34	4.66392	116	15.9122	94	12.8944	47	6.44719
Q9NQA5	TRPV5_HUMAN	729	14	1.92044	62	8.5048	70	9.60219	132	18.107	75	10.2881	81	11.1111
Q15366	PCBP2_HUMAN	365	7	1.91781	28	7.67123	11	3.0137	39	10.6849	35	9.58904	18	4.93151
P35270	SPRE_HUMAN	261	5	1.91571	29	11.1111	12	4.5977	41	15.7088	34	13.0268	16	6.13027
Q8WUM9	S20A1_HUMAN	679	13	1.91458	57	8.3947	59	8.68925	116	17.0839	69	10.162	70	10.3093
P61158	ARP3_HUMAN	418	8	1.91388	44	10.5263	43	10.2871	87	20.8134	52	12.4402	51	12.201
Q9UGP5	DPOLL_HUMAN	575	11	1.91304	68	11.8261	33	5.73913	101	17.5652	79	13.7391	44	7.65217
Q14140	SRTD2_HUMAN	314	6	1.91083	22	7.00637	16	5.09554	38	12.1019	28	8.9172	21	6.6879
Q96EK4	THA11_HUMAN	314	6	1.91083	34	10.828	11	3.50318	45	14.3312	40	12.7389	17	5.41401
Q8N414	PGBD5_HUMAN	524	10	1.9084	59	11.2595	57	10.8779	116	22.1374	69	13.1679	66	12.5954
Q8NER1	TRPV1_HUMAN	839	16	1.90703	86	10.2503	90	10.7271	176	20.9774	101	12.0381	104	12.3957
P08648	ITA5_HUMAN	1049	20	1.90658	77	7.34032	93	8.86559	170	16.2059	95	9.05624	111	10.5815
P31949	S10AB_HUMAN	105	2	1.90476	13	12.381	10	9.52381	23	21.9048	14	13.3333	12	11.4286
P99999	CYC_HUMAN	105	2	1.90476	20	19.0476	9	8.57143	29	27.619	21	20	11	10.4762
O00230	CORT_HUMAN	105	2	1.90476	12	11.4286	9	8.57143	21	20	14	13.3333	11	10.4762
Q13769	THOC5_HUMAN	683	13	1.90337	89	13.0307	47	6.88141	136	19.9122	100	14.6413	60	8.78477
Q13410	BT1A1_HUMAN	526	10	1.90114	56	10.6464	42	7.98479	98	18.6312	65	12.3574	51	9.69582
P62280	RS11_HUMAN	158	3	1.89873	34	21.519	15	9.49367	49	31.0127	36	22.7848	18	11.3924
Q9H0H5	RGAP1_HUMAN	632	12	1.89873	90	14.2405	32	5.06329	122	19.3038	100	15.8228	44	6.96203
O14492	SH2B2_HUMAN	632	12	1.89873	60	9.49367	39	6.17089	99	15.6646	71	11.2342	49	7.75316
P49790	NU153_HUMAN	1475	28	1.89831	119	8.0678	101	6.84746	220	14.9153	140	9.49153	129	8.74576
O14917	PCD17_HUMAN	1159	22	1.89819	108	9.31838	63	5.43572	171	14.7541	127	10.9577	84	7.24763
O43825	B3GT2_HUMAN	422	8	1.89573	50	11.8483	52	12.3223	102	24.1706	57	13.5071	58	13.7441
Q8TDN4	CABL1_HUMAN	633	12	1.89573	71	11.2164	33	5.21327	104	16.4297	82	12.9542	43	6.79305
Q99250	SCN2A_HUMAN	2005	38	1.89526	206	10.2743	227	11.3217	433	21.596	241	12.02	262	13.0673
Q8WWH4	ASZ1_HUMAN	475	9	1.89474	57	12	28	5.89474	85	17.8947	65	13.6842	37	7.78947
P09017	HXC4_HUMAN	264	5	1.89394	31	11.7424	17	6.43939	48	18.1818	36	13.6364	22	8.33333
O14756	H17B6_HUMAN	317	6	1.89274	33	10.4101	33	10.4101	66	20.8202	39	12.3028	38	11.9874
Q8IY17	PLPL6_HUMAN	1375	26	1.89091	151	10.9818	82	5.96364	233	16.9455	173	12.5818	105	7.63636
Q05823	RN5A_HUMAN	741	14	1.88934	97	13.0904	51	6.88259	148	19.973	111	14.9798	64	8.63698
Q8IWA4	MFN1_HUMAN	741	14	1.88934	87	11.7409	54	7.28745	141	19.0283	98	13.2254	66	8.90688
Q8NHH9	ATLA2_HUMAN	583	11	1.88679	56	9.60549	52	8.91938	108	18.5249	67	11.4923	61	10.4631
Q9BVN2	RUSC1_HUMAN	902	17	1.8847	81	8.98004	42	4.65632	123	13.6364	96	10.643	58	6.43016
Q9Y4J8	DTNA_HUMAN	743	14	1.88425	79	10.6326	45	6.05653	124	16.6891	91	12.2476	58	7.80619
O14744	ANM5_HUMAN	637	12	1.88383	61	9.57614	63	9.89011	124	19.4662	71	11.146	73	11.46
Q8IXJ9	ASXL1_HUMAN	1541	29	1.88189	161	10.4478	59	3.82868	220	14.2764	189	12.2648	86	5.58079
O60909	B4GT2_HUMAN	372	7	1.88172	42	11.2903	36	9.67742	78	20.9677	48	12.9032	43	11.5591
O15455	TLR3_HUMAN	904	17	1.88053	84	9.29204	88	9.73451	172	19.0265	99	10.9513	103	11.3938
Q8NE31	FA13C_HUMAN	585	11	1.88034	72	12.3077	26	4.44444	98	16.7521	80	13.6752	36	6.15385
Q30154	DRB5_HUMAN	266	5	1.8797	25	9.3985	27	10.1504	52	19.5489	30	11.2782	31	11.6541
O94805	ACL6B_HUMAN	426	8	1.87793	40	9.38967	34	7.98122	74	17.3709	47	11.0329	42	9.85915
P15814	IGLL1_HUMAN	213	4	1.87793	20	9.38967	11	5.16432	31	14.554	23	10.7981	15	7.04225
Q96DA2	RB39B_HUMAN	213	4	1.87793	30	14.0845	22	10.3286	52	24.4131	32	15.0235	26	12.2066
P56589	PEX3_HUMAN	373	7	1.87668	37	9.91957	24	6.43432	61	16.3539	43	11.5282	31	8.31099
P10619	PPGB_HUMAN	480	9	1.875	38	7.91667	60	12.5	98	20.4167	46	9.58333	69	14.375
Q9H1P3	OSBL2_HUMAN	480	9	1.875	54	11.25	48	10	102	21.25	61	12.7083	57	11.875
B1AK53	ESPN_HUMAN	854	16	1.87354	84	9.83607	30	3.51288	114	13.3489	99	11.5925	46	5.38642
Q8N159	NAGS_HUMAN	534	10	1.87266	53	9.92509	39	7.30337	92	17.2285	62	11.6105	48	8.98876
Q9Y3V2	RWDD3_HUMAN	267	5	1.87266	31	11.6105	19	7.1161	50	18.7266	34	12.7341	23	8.61423
O15399	NMDE4_HUMAN	1336	25	1.87126	121	9.05689	107	8.00898	228	17.0659	143	10.7036	130	9.73054
Q5TA50	CPTP_HUMAN	214	4	1.86916	24	11.215	18	8.41121	42	19.6262	28	13.0841	21	9.81308
Q9BWM7	SFXN3_HUMAN	321	6	1.86916	29	9.03427	27	8.41121	56	17.4455	35	10.9034	32	9.96885
O94964	MTCL2_HUMAN	1661	31	1.86635	225	13.5461	72	4.33474	297	17.8808	253	15.2318	103	6.20108
Q9Y6R4	M3K4_HUMAN	1608	30	1.86567	190	11.8159	115	7.15174	305	18.9677	217	13.495	143	8.89303
Q8IXH7	NELFD_HUMAN	590	11	1.86441	48	8.13559	46	7.79661	94	15.9322	58	9.83051	57	9.66102
Q08345	DDR1_HUMAN	913	17	1.86199	84	9.20044	74	8.10515	158	17.3056	99	10.8434	90	9.85761
P41440	S19A1_HUMAN	591	11	1.86125	44	7.44501	64	10.8291	108	18.2741	54	9.13706	75	12.6904
Q9UH73	COE1_HUMAN	591	11	1.86125	54	9.13706	44	7.44501	98	16.5821	63	10.6599	54	9.13706
P61020	RAB5B_HUMAN	215	4	1.86047	23	10.6977	17	7.90698	40	18.6047	27	12.5581	21	9.76744
P61106	RAB14_HUMAN	215	4	1.86047	22	10.2326	20	9.30233	42	19.5349	26	12.093	24	11.1628
Q9BWV7	TTLL2_HUMAN	592	11	1.85811	66	11.1486	55	9.29054	121	20.4392	76	12.8378	66	11.1486
Q9GZT8	NIF3L_HUMAN	377	7	1.85676	34	9.01857	20	5.30504	54	14.3236	41	10.8753	27	7.1618
Q8NA82	MARHA_HUMAN	808	15	1.85644	97	12.005	46	5.69307	143	17.698	111	13.7376	61	7.5495
O15169	AXIN1_HUMAN	862	16	1.85615	110	12.761	51	5.91647	161	18.6775	124	14.3852	65	7.5406
Q969R2	OSBP2_HUMAN	916	17	1.8559	95	10.3712	62	6.76856	157	17.1397	111	12.1179	79	8.62445
P36021	MOT8_HUMAN	539	10	1.85529	38	7.05009	59	10.9462	97	17.9963	48	8.90538	67	12.4304
Q00LT1	PRCD_HUMAN	54	1	1.85185	8	14.8148	3	5.55556	11	20.3704	9	16.6667	4	7.40741
Q14493	SLBP_HUMAN	270	5	1.85185	44	16.2963	20	7.40741	64	23.7037	47	17.4074	25	9.25926
Q9UL12	SARDH_HUMAN	918	17	1.85185	87	9.47712	78	8.49673	165	17.9739	104	11.329	95	10.3486
Q15269	PWP2_HUMAN	919	17	1.84984	93	10.1197	92	10.0109	185	20.1306	107	11.6431	108	11.7519
Q9H0R5	GBP3_HUMAN	595	11	1.84874	79	13.2773	41	6.89076	120	20.1681	87	14.6218	48	8.06723
O95528	GTR10_HUMAN	541	10	1.84843	33	6.09982	47	8.68762	80	14.7874	43	7.94824	56	10.3512
O15374	MOT5_HUMAN	487	9	1.84805	34	6.98152	66	13.5524	100	20.5339	43	8.82957	74	15.1951
P14550	AK1A1_HUMAN	325	6	1.84615	35	10.7692	26	8	61	18.7692	41	12.6154	32	9.84615
Q86UT6	NLRX1_HUMAN	975	18	1.84615	95	9.74359	67	6.87179	162	16.6154	112	11.4872	82	8.41026
A0PJK1	SC5AA_HUMAN	596	11	1.84564	31	5.20134	60	10.0671	91	15.2685	42	7.04698	70	11.745
Q8TCC7	S22A8_HUMAN	542	10	1.84502	41	7.56458	56	10.3321	97	17.8967	50	9.22509	64	11.8081
O95155	UBE4B_HUMAN	1302	24	1.84332	133	10.2151	98	7.52688	231	17.7419	152	11.6743	121	9.29339
Q99578	RIT2_HUMAN	217	4	1.84332	30	13.8249	20	9.21659	50	23.0415	34	15.6682	23	10.5991
Q9HAV7	GRPE1_HUMAN	217	4	1.84332	32	14.7465	9	4.14747	41	18.894	36	16.5899	12	5.52995
P54296	MYOM2_HUMAN	1465	27	1.843	168	11.4676	132	9.01024	300	20.4778	191	13.0375	156	10.6485
P18074	ERCC2_HUMAN	760	14	1.84211	90	11.8421	68	8.94737	158	20.7895	102	13.4211	79	10.3947
Q8TD26	CHD6_HUMAN	2715	50	1.84162	355	13.0755	168	6.18785	523	19.2634	398	14.6593	214	7.88214
Q8N1T3	MYO1H_HUMAN	1032	19	1.84109	148	14.3411	103	9.98062	251	24.3217	165	15.9884	118	11.4341
P51857	AK1D1_HUMAN	326	6	1.84049	37	11.3497	29	8.89571	66	20.2454	43	13.1902	33	10.1227
Q96J65	MRP9_HUMAN	1359	25	1.83959	145	10.6696	119	8.75644	264	19.426	170	12.5092	142	10.4489
P40145	ADCY8_HUMAN	1251	23	1.83853	120	9.59233	106	8.47322	226	18.0655	140	11.191	127	10.1519
P10911	MCF2_HUMAN	925	17	1.83784	109	11.7838	82	8.86486	191	20.6486	125	13.5135	96	10.3784
O00409	FOXN3_HUMAN	490	9	1.83673	54	11.0204	28	5.71429	82	16.7347	62	12.6531	36	7.34694
Q8WVP7	LMBR1_HUMAN	490	9	1.83673	38	7.7551	51	10.4082	89	18.1633	47	9.59184	60	12.2449
O60266	ADCY3_HUMAN	1144	21	1.83566	113	9.87762	105	9.17832	218	19.0559	133	11.6259	125	10.9266
P52961	NAR1_HUMAN	327	6	1.83486	26	7.95107	32	9.78593	58	17.737	30	9.17431	38	11.6208
Q9BZR8	B2L14_HUMAN	327	6	1.83486	39	11.9266	25	7.64526	64	19.5719	44	13.4557	31	9.48012
Q9UBN1	CCG4_HUMAN	327	6	1.83486	39	11.9266	32	9.78593	71	21.7125	44	13.4557	38	11.6208
O00194	RB27B_HUMAN	218	4	1.83486	25	11.4679	22	10.0917	47	21.5596	28	12.844	25	11.4679
O00291	HIP1_HUMAN	1037	19	1.83221	123	11.8611	51	4.91803	174	16.7792	142	13.6933	69	6.65381
P13765	DOB_HUMAN	273	5	1.8315	25	9.15751	26	9.52381	51	18.6813	30	10.989	31	11.3553
P21583	SCF_HUMAN	273	5	1.8315	32	11.7216	23	8.42491	55	20.1465	37	13.5531	28	10.2564
P20132	SDHL_HUMAN	328	6	1.82927	30	9.14634	19	5.79268	49	14.939	36	10.9756	24	7.31707
Q969Y2	GTPB3_HUMAN	492	9	1.82927	48	9.7561	15	3.04878	63	12.8049	56	11.3821	23	4.6748
Q9HCJ1	ANKH_HUMAN	492	9	1.82927	41	8.33333	44	8.94309	85	17.2764	49	9.95935	53	10.7724
P36222	CH3L1_HUMAN	383	7	1.82768	40	10.4439	43	11.2272	83	21.671	47	12.2715	49	12.7937
Q12888	TP53B_HUMAN	1972	36	1.82556	174	8.82353	71	3.60041	245	12.4239	208	10.5477	106	5.37525
Q5XXA6	ANO1_HUMAN	986	18	1.82556	129	13.0832	109	11.0548	238	24.1379	147	14.9087	127	12.8803
Q9UKU9	ANGL2_HUMAN	493	9	1.82556	51	10.3448	51	10.3448	102	20.6897	59	11.9675	59	11.9675
Q9H089	LSG1_HUMAN	658	12	1.82371	84	12.766	45	6.83891	129	19.6049	95	14.4377	56	8.51064
Q9NYA1	SPHK1_HUMAN	384	7	1.82292	33	8.59375	29	7.55208	62	16.1458	39	10.1562	36	9.375
P41252	SYIC_HUMAN	1262	23	1.8225	143	11.3312	120	9.50872	263	20.8399	163	12.916	142	11.252
Q16798	MAON_HUMAN	604	11	1.82119	61	10.0993	47	7.78146	108	17.8808	71	11.755	57	9.43709
P98198	AT8B2_HUMAN	1209	22	1.81969	121	10.0083	136	11.249	257	21.2572	141	11.6625	154	12.7378
O60548	FOXD2_HUMAN	495	9	1.81818	32	6.46465	29	5.85859	61	12.3232	41	8.28283	38	7.67677
O75319	DUS11_HUMAN	330	6	1.81818	46	13.9394	36	10.9091	82	24.8485	51	15.4545	42	12.7273
P49279	NRAM1_HUMAN	550	10	1.81818	33	6	59	10.7273	92	16.7273	43	7.81818	69	12.5455
Q8IU85	KCC1D_HUMAN	385	7	1.81818	46	11.9481	33	8.57143	79	20.5195	52	13.5065	40	10.3896
Q16665	HIF1A_HUMAN	826	15	1.81598	82	9.92736	49	5.9322	131	15.8596	96	11.6223	62	7.50605
P54289	CA2D1_HUMAN	1103	20	1.81324	107	9.70082	111	10.0635	218	19.7643	127	11.5141	130	11.786
P06756	ITAV_HUMAN	1048	19	1.81298	100	9.54198	93	8.87405	193	18.416	117	11.1641	110	10.4962
O75752	B3GL1_HUMAN	331	6	1.81269	32	9.66767	51	15.4079	83	25.0755	38	11.4804	55	16.6163
Q5T3U5	MRP7_HUMAN	1492	27	1.80965	111	7.43968	102	6.83646	213	14.2761	135	9.04826	126	8.44504
Q9P1W8	SIRPG_HUMAN	387	7	1.80879	34	8.78553	24	6.20155	58	14.9871	41	10.5943	30	7.75194
P01579	IFNG_HUMAN	166	3	1.80723	29	17.4699	19	11.4458	48	28.9157	32	19.2771	21	12.6506
Q8N695	SC5A8_HUMAN	610	11	1.80328	34	5.57377	77	12.623	111	18.1967	44	7.21311	86	14.0984
O43196	MSH5_HUMAN	834	15	1.79856	81	9.71223	59	7.07434	140	16.7866	95	11.3909	74	8.8729
Q96MW5	COG8_HUMAN	612	11	1.79739	56	9.15033	45	7.35294	101	16.5033	66	10.7843	55	8.98693
P41159	LEP_HUMAN	167	3	1.79641	11	6.58683	12	7.18563	23	13.7725	14	8.38323	15	8.98204
Q14938	NFIX_HUMAN	502	9	1.79283	48	9.56175	39	7.76892	87	17.3307	57	11.3546	46	9.16335
Q6UW63	PLGT2_HUMAN	502	9	1.79283	67	13.3466	57	11.3546	124	24.7012	76	15.1394	63	12.5498
P63128	POK9_HUMAN	1117	20	1.79051	119	10.6535	72	6.44584	191	17.0994	137	12.265	91	8.14682
Q8WZ75	ROBO4_HUMAN	1007	18	1.78749	73	7.24926	50	4.96524	123	12.2145	91	9.03674	67	6.65343
O14559	RHG33_HUMAN	1287	23	1.7871	116	9.01321	67	5.20591	183	14.2191	134	10.4118	89	6.91531
O14657	TOR1B_HUMAN	336	6	1.78571	40	11.9048	34	10.119	74	22.0238	46	13.6905	39	11.6071
P27694	RFA1_HUMAN	616	11	1.78571	66	10.7143	49	7.95455	115	18.6688	75	12.1753	60	9.74026
Q08708	CLM6_HUMAN	224	4	1.78571	22	9.82143	14	6.25	36	16.0714	25	11.1607	16	7.14286
Q86UC2	RSPH3_HUMAN	560	10	1.78571	70	12.5	32	5.71429	102	18.2143	80	14.2857	42	7.5
Q9H0P0	5NT3A_HUMAN	336	6	1.78571	44	13.0952	26	7.7381	70	20.8333	49	14.5833	32	9.52381
Q9HBH5	RDH14_HUMAN	336	6	1.78571	40	11.9048	23	6.84524	63	18.75	46	13.6905	27	8.03571
Q9UIF9	BAZ2A_HUMAN	1905	34	1.78478	217	11.3911	100	5.24934	317	16.6404	249	13.0709	129	6.77165
Q15021	CND1_HUMAN	1401	25	1.78444	157	11.2063	79	5.63883	236	16.8451	180	12.848	101	7.20914
Q4G0N8	SL9C1_HUMAN	1177	21	1.7842	115	9.7706	131	11.13	246	20.9006	134	11.3849	151	12.8292
Q49A88	CCD14_HUMAN	953	17	1.78384	125	13.1165	37	3.88248	162	16.999	139	14.5855	54	5.66632
Q8NDV3	SMC1B_HUMAN	1235	22	1.78138	206	16.6802	72	5.82996	278	22.5101	226	18.2996	93	7.53036
Q76EJ3	S35D2_HUMAN	337	6	1.78042	21	6.23145	38	11.276	59	17.5074	27	8.01187	44	13.0564
Q9BTX1	NDC1_HUMAN	674	12	1.78042	51	7.56677	82	12.1662	133	19.7329	63	9.34718	92	13.6499
Q15744	CEBPE_HUMAN	281	5	1.77936	36	12.8114	15	5.33808	51	18.1495	41	14.5907	20	7.11744
P51956	NEK3_HUMAN	506	9	1.77866	65	12.8458	37	7.31225	102	20.1581	73	14.4269	45	8.89328
Q13509	TBB3_HUMAN	450	8	1.77778	37	8.22222	40	8.88889	77	17.1111	45	10	47	10.4444
O14578	CTRO_HUMAN	2027	36	1.77602	282	13.9122	115	5.67341	397	19.5856	313	15.4415	149	7.35076
P51884	LUM_HUMAN	338	6	1.77515	34	10.0592	30	8.87574	64	18.9349	40	11.8343	34	10.0592
P21757	MSRE_HUMAN	451	8	1.77384	44	9.7561	25	5.54324	69	15.2993	52	11.5299	32	7.09534
Q9BPU6	DPYL5_HUMAN	564	10	1.77305	58	10.2837	34	6.02837	92	16.3121	66	11.7021	43	7.62411
Q9Y4U1	MMAC_HUMAN	282	5	1.77305	25	8.86525	28	9.92908	53	18.7943	30	10.6383	33	11.7021
Q9UBT7	CTNL1_HUMAN	734	13	1.77112	88	11.9891	36	4.90463	124	16.8937	99	13.4877	48	6.53951
P23416	GLRA2_HUMAN	452	8	1.76991	54	11.9469	51	11.2832	105	23.2301	62	13.7168	57	12.6106
P48735	IDHP_HUMAN	452	8	1.76991	57	12.6106	41	9.0708	98	21.6814	64	14.1593	49	10.8407
O00757	F16P2_HUMAN	339	6	1.76991	37	10.9145	24	7.07965	61	17.9941	43	12.6844	30	8.84956
B0I1T2	MYO1G_HUMAN	1018	18	1.76817	131	12.8684	83	8.15324	214	21.0216	146	14.3418	98	9.62672
Q68DD2	PA24F_HUMAN	849	15	1.76678	73	8.59835	71	8.36278	144	16.9611	86	10.1296	83	9.77621
O15054	KDM6B_HUMAN	1643	29	1.76506	155	9.43396	83	5.05173	238	14.4857	182	11.0773	105	6.39075
Q5TGU0	TSPO2_HUMAN	170	3	1.76471	8	4.70588	21	12.3529	29	17.0588	11	6.47059	22	12.9412
Q9C0D9	EPT1_HUMAN	397	7	1.76322	19	4.78589	66	16.6247	85	21.4106	25	6.29723	73	18.3879
Q9HAC8	UBTD1_HUMAN	227	4	1.76211	33	14.5374	14	6.1674	47	20.7048	37	16.2996	17	7.48899
Q3KR37	ASTRB_HUMAN	738	13	1.76152	88	11.9241	67	9.07859	155	21.0027	101	13.6856	79	10.7046
O43143	DHX15_HUMAN	795	14	1.76101	104	13.0818	56	7.04403	160	20.1258	117	14.717	68	8.55346
O95470	SGPL1_HUMAN	568	10	1.76056	68	11.9718	58	10.2113	126	22.1831	77	13.5563	67	11.7958
Q9UBV8	PEF1_HUMAN	284	5	1.76056	17	5.98592	32	11.2676	49	17.2535	22	7.74648	36	12.6761
Q14C86	GAPD1_HUMAN	1478	26	1.75913	156	10.5548	84	5.68336	240	16.2382	180	12.1786	109	7.37483
Q96RS0	TGS1_HUMAN	853	15	1.7585	101	11.8406	73	8.55803	174	20.3986	113	13.2474	87	10.1993
Q9Y2G9	SBNO2_HUMAN	1366	24	1.75695	148	10.8346	99	7.24744	247	18.082	171	12.5183	122	8.93119
P05386	RLA1_HUMAN	114	2	1.75439	7	6.14035	5	4.38596	12	10.5263	9	7.89474	7	6.14035
P38571	LICH_HUMAN	399	7	1.75439	32	8.02005	51	12.782	83	20.802	39	9.77444	57	14.2857
Q15386	UBE3C_HUMAN	1083	19	1.75439	114	10.5263	108	9.9723	222	20.4986	130	12.0037	125	11.542
Q5T7B8	KIF24_HUMAN	1368	24	1.75439	150	10.9649	83	6.06725	233	17.0322	169	12.3538	105	7.67544
Q86UL3	GPAT4_HUMAN	456	8	1.75439	56	12.2807	48	10.5263	104	22.807	64	14.0351	54	11.8421
Q8IWT1	SCN4B_HUMAN	228	4	1.75439	27	11.8421	14	6.14035	41	17.9825	31	13.5965	18	7.89474
Q8N488	RYBP_HUMAN	228	4	1.75439	35	15.3509	7	3.07018	42	18.4211	38	16.6667	11	4.82456
Q9ULE6	PALD_HUMAN	856	15	1.75234	86	10.0467	69	8.06075	155	18.1075	101	11.7991	82	9.57944
Q8IYD1	ERF3B_HUMAN	628	11	1.75159	72	11.465	38	6.05096	110	17.5159	83	13.2166	48	7.64331
Q15646	OASL_HUMAN	514	9	1.75097	61	11.8677	49	9.53307	110	21.4008	69	13.4241	57	11.0895
Q9ULR3	PPM1H_HUMAN	514	9	1.75097	55	10.7004	31	6.03113	86	16.7315	64	12.4514	40	7.7821
P49137	MAPK2_HUMAN	400	7	1.75	49	12.25	27	6.75	76	19	55	13.75	34	8.5
Q14147	DHX34_HUMAN	1143	20	1.74978	134	11.7235	77	6.73666	211	18.4602	153	13.3858	96	8.39895
O60930	RNH1_HUMAN	286	5	1.74825	39	13.6364	26	9.09091	65	22.7273	44	15.3846	31	10.8392
P13591	NCAM1_HUMAN	858	15	1.74825	77	8.97436	63	7.34266	140	16.317	89	10.373	78	9.09091
Q93015	NAA80_HUMAN	286	5	1.74825	25	8.74126	11	3.84615	36	12.5874	30	10.4895	16	5.59441
Q9ULT0	TTC7A_HUMAN	858	15	1.74825	90	10.4895	56	6.52681	146	17.0163	104	12.1212	69	8.04196
A0A087X1C5	CP2D7_HUMAN	515	9	1.74757	49	9.51456	43	8.34951	92	17.8641	58	11.2621	51	9.90291
O43761	SNG3_HUMAN	229	4	1.74672	16	6.9869	29	12.6638	45	19.6507	19	8.29694	32	13.9738
Q6NVH7	SWAP1_HUMAN	229	4	1.74672	15	6.55022	12	5.24017	27	11.7904	19	8.29694	16	6.9869
Q96K76	UBP47_HUMAN	1375	24	1.74545	162	11.7818	117	8.50909	279	20.2909	181	13.1636	139	10.1091
O95881	TXD12_HUMAN	172	3	1.74419	17	9.88372	15	8.72093	32	18.6047	20	11.6279	17	9.88372
Q6ZWK4	RHEX_HUMAN	172	3	1.74419	10	5.81395	14	8.13953	24	13.9535	13	7.55814	17	9.88372
P21589	5NTD_HUMAN	574	10	1.74216	57	9.93031	47	8.18815	104	18.1185	64	11.1498	57	9.93031
Q9UN88	GBRT_HUMAN	632	11	1.74051	52	8.22785	68	10.7595	120	18.9873	62	9.81013	79	12.5
O95237	LRAT_HUMAN	230	4	1.73913	23	10	21	9.13043	44	19.1304	27	11.7391	23	10
Q15125	EBP_HUMAN	230	4	1.73913	16	6.95652	34	14.7826	50	21.7391	20	8.69565	38	16.5217
Q6ZUJ8	BCAP_HUMAN	805	14	1.73913	80	9.93789	54	6.70807	134	16.646	90	11.1801	67	8.32298
Q9BWG6	SCNM1_HUMAN	230	4	1.73913	35	15.2174	12	5.21739	47	20.4348	39	16.9565	16	6.95652
Q99593	TBX5_HUMAN	518	9	1.73745	46	8.88031	39	7.52896	85	16.4093	55	10.6178	47	9.07336
O75864	PPR37_HUMAN	691	12	1.73661	67	9.69609	22	3.18379	89	12.8799	79	11.4327	34	4.92041
O95886	DLGP3_HUMAN	979	17	1.73647	121	12.3596	54	5.51583	175	17.8754	136	13.8917	68	6.94586
Q16849	PTPRN_HUMAN	979	17	1.73647	81	8.27375	48	4.90296	129	13.1767	97	9.90807	63	6.43514
Q96PD5	PGRP2_HUMAN	576	10	1.73611	46	7.98611	39	6.77083	85	14.7569	54	9.375	49	8.50694
Q9BRG2	SH23A_HUMAN	576	10	1.73611	55	9.54861	26	4.51389	81	14.0625	64	11.1111	34	5.90278
Q5VYK3	ECM29_HUMAN	1845	32	1.73442	194	10.5149	98	5.31165	292	15.8266	224	12.1409	129	6.99187
P78413	IRX4_HUMAN	519	9	1.7341	47	9.05588	29	5.58767	76	14.6435	55	10.5973	36	6.93642
Q9H7P9	PKHG2_HUMAN	1386	24	1.7316	107	7.72006	51	3.67965	158	11.3997	130	9.37951	72	5.19481
P27338	AOFB_HUMAN	520	9	1.73077	60	11.5385	45	8.65385	105	20.1923	67	12.8846	52	10
Q969N2	PIGT_HUMAN	578	10	1.7301	51	8.82353	63	10.8997	114	19.7232	60	10.3806	71	12.2837
Q9NQG6	MID51_HUMAN	463	8	1.72786	49	10.5832	31	6.69546	80	17.2786	56	12.095	37	7.99136
O14936	CSKP_HUMAN	926	16	1.72786	106	11.4471	72	7.77538	178	19.2225	121	13.067	87	9.39525
O00505	IMA4_HUMAN	521	9	1.72745	42	8.06142	28	5.37428	70	13.4357	50	9.59693	36	6.90979
P46100	ATRX_HUMAN	2492	43	1.72552	407	16.3323	119	4.77528	526	21.1075	446	17.8973	156	6.26003
O75438	NDUB1_HUMAN	58	1	1.72414	9	15.5172	6	10.3448	15	25.8621	10	17.2414	7	12.069
P01825	HV459_HUMAN	116	2	1.72414	9	7.75862	16	13.7931	25	21.5517	11	9.48276	17	14.6552
P13378	HXD8_HUMAN	290	5	1.72414	32	11.0345	24	8.27586	56	19.3103	37	12.7586	29	10
P18440	ARY1_HUMAN	290	5	1.72414	32	11.0345	35	12.069	67	23.1034	37	12.7586	38	13.1034
Q5VWC8	HACD4_HUMAN	232	4	1.72414	18	7.75862	41	17.6724	59	25.431	22	9.48276	44	18.9655
Q9BS26	ERP44_HUMAN	406	7	1.72414	42	10.3448	41	10.0985	83	20.4433	47	11.5764	47	11.5764
O00258	GET1_HUMAN	174	3	1.72414	21	12.069	17	9.77011	38	21.8391	24	13.7931	20	11.4943
Q3SY84	K2C71_HUMAN	523	9	1.72084	68	13.0019	30	5.73614	98	18.738	76	14.5315	39	7.45698
Q70YC5	ZN365_HUMAN	407	7	1.7199	61	14.9877	22	5.40541	83	20.3931	64	15.7248	29	7.12531
Q02413	DSG1_HUMAN	1049	18	1.71592	75	7.14967	67	6.38704	142	13.5367	93	8.86559	83	7.9123
P22735	TGM1_HUMAN	817	14	1.71359	72	8.81273	67	8.20073	139	17.0135	84	10.2815	79	9.66952
Q8IWW8	HOT_HUMAN	467	8	1.71306	40	8.56531	33	7.06638	73	15.6317	48	10.2784	41	8.77944
Q8TDI8	TMC1_HUMAN	760	13	1.71053	93	12.2368	97	12.7632	190	25	105	13.8158	106	13.9474
P23083	HV102_HUMAN	117	2	1.7094	10	8.54701	16	13.6752	26	22.2222	12	10.2564	17	14.5299
Q96GQ5	RUSF1_HUMAN	468	8	1.7094	41	8.76068	36	7.69231	77	16.453	48	10.2564	44	9.40171
Q6DN12	MCTP2_HUMAN	878	15	1.70843	111	12.6424	67	7.63098	178	20.2733	125	14.2369	80	9.11162
Q9Y2X7	GIT1_HUMAN	761	13	1.70828	90	11.8265	37	4.86202	127	16.6886	103	13.5348	50	6.5703
O95905	ECD_HUMAN	644	11	1.70807	62	9.62733	51	7.91925	113	17.5466	71	11.0248	60	9.31677
A0JNW5	BLT3B_HUMAN	1464	25	1.70765	151	10.3142	91	6.21585	242	16.5301	175	11.9536	115	7.85519
P15880	RS2_HUMAN	293	5	1.70648	47	16.041	21	7.16724	68	23.2082	50	17.0648	26	8.87372
Q53FZ2	ACSM3_HUMAN	586	10	1.70648	71	12.116	57	9.72696	128	21.843	79	13.4812	66	11.2628
P52732	KIF11_HUMAN	1056	18	1.70455	131	12.4053	47	4.45076	178	16.8561	146	13.8258	63	5.96591
Q9ULX3	NOB1_HUMAN	412	7	1.69903	53	12.8641	27	6.5534	80	19.4175	59	14.3204	33	8.00971
P54855	UDB15_HUMAN	530	9	1.69811	55	10.3774	64	12.0755	119	22.4528	64	12.0755	71	13.3962
O15155	BET1_HUMAN	118	2	1.69492	15	12.7119	13	11.0169	28	23.7288	17	14.4068	15	12.7119
Q8NHL6	LIRB1_HUMAN	650	11	1.69231	49	7.53846	47	7.23077	96	14.7692	55	8.46154	58	8.92308
Q9UEE5	ST17A_HUMAN	414	7	1.69082	46	11.1111	28	6.76329	74	17.8744	52	12.5604	35	8.45411
Q8N5V2	NGEF_HUMAN	710	12	1.69014	96	13.5211	43	6.05634	139	19.5775	107	15.0704	55	7.74648
Q9H3M9	ATX3L_HUMAN	355	6	1.69014	36	10.1408	28	7.88732	64	18.0282	42	11.831	34	9.57746
Q01814	AT2B2_HUMAN	1243	21	1.68946	132	10.6195	78	6.27514	210	16.8946	150	12.0676	97	7.8037
P15848	ARSB_HUMAN	533	9	1.68856	50	9.38086	48	9.00563	98	18.3865	56	10.5066	57	10.6942
A2RUB6	CCD66_HUMAN	948	16	1.68776	146	15.4008	41	4.32489	187	19.7257	160	16.8776	56	5.90717
Q9ULC3	RAB23_HUMAN	237	4	1.68776	32	13.5021	18	7.59494	50	21.097	36	15.1899	21	8.86076
Q9Y3B8	ORN_HUMAN	237	4	1.68776	34	14.346	16	6.75105	50	21.097	38	16.0338	19	8.01688
O43529	CHSTA_HUMAN	356	6	1.68539	47	13.2022	46	12.9213	93	26.1236	53	14.8876	51	14.3258
Q9H204	MED28_HUMAN	178	3	1.68539	13	7.30337	9	5.05618	22	12.3596	16	8.98876	12	6.74157
Q9BXF3	CECR2_HUMAN	1484	25	1.68464	148	9.97305	88	5.92992	236	15.903	171	11.5229	111	7.47978
Q01518	CAP1_HUMAN	475	8	1.68421	53	11.1579	28	5.89474	81	17.0526	60	12.6316	36	7.57895
Q8NA56	TTC29_HUMAN	475	8	1.68421	62	13.0526	45	9.47368	107	22.5263	69	14.5263	52	10.9474
P0C024	NUDT7_HUMAN	238	4	1.68067	26	10.9244	19	7.98319	45	18.9076	30	12.605	23	9.66387
Q16629	SRSF7_HUMAN	238	4	1.68067	62	26.0504	19	7.98319	81	34.0336	65	27.3109	23	9.66387
Q9NSE4	SYIM_HUMAN	1012	17	1.67984	112	11.0672	89	8.79447	201	19.8617	124	12.253	103	10.1779
Q01064	PDE1B_HUMAN	536	9	1.6791	56	10.4478	43	8.02239	99	18.4701	65	12.1269	51	9.51493
O75628	REM1_HUMAN	298	5	1.67785	40	13.4228	14	4.69799	54	18.1208	44	14.7651	19	6.37584
Q9H4A6	GOLP3_HUMAN	298	5	1.67785	44	14.7651	14	4.69799	58	19.4631	49	16.443	19	6.37584
Q9UH92	MLX_HUMAN	298	5	1.67785	41	13.7584	20	6.71141	61	20.4698	46	15.4362	25	8.38926
Q92539	LPIN2_HUMAN	896	15	1.67411	93	10.3795	61	6.80804	154	17.1875	107	11.942	74	8.25893
P09914	IFIT1_HUMAN	478	8	1.67364	67	14.0167	43	8.99582	110	23.0126	73	15.272	51	10.6695
P29475	NOS1_HUMAN	1434	24	1.67364	164	11.4365	116	8.08926	280	19.5258	185	12.901	137	9.5537
P46098	5HT3A_HUMAN	478	8	1.67364	40	8.3682	54	11.2971	94	19.6653	47	9.83264	62	12.9707
O43310	CTIF_HUMAN	598	10	1.67224	73	12.2074	33	5.51839	106	17.7258	83	13.8796	43	7.19064
Q92187	SIA8D_HUMAN	359	6	1.67131	54	15.0418	31	8.6351	85	23.6769	58	16.156	36	10.0279
Q96AQ8	MCUR1_HUMAN	359	6	1.67131	50	13.9276	19	5.29248	69	19.2201	54	15.0418	25	6.96379
P11464	PSG1_HUMAN	419	7	1.67064	38	9.06921	40	9.54654	78	18.6158	45	10.7399	47	11.2172
Q8N139	ABCA6_HUMAN	1617	27	1.66976	159	9.83302	162	10.0186	321	19.8516	181	11.1936	186	11.5028
P46934	NEDD4_HUMAN	1319	22	1.66793	136	10.3108	109	8.26384	245	18.5747	158	11.9788	131	9.93177
P01615	KVD28_HUMAN	120	2	1.66667	6	5	10	8.33333	16	13.3333	8	6.66667	11	9.16667
Q9Y2K2	SIK3_HUMAN	1321	22	1.6654	102	7.72142	64	4.84481	166	12.5662	124	9.38683	84	6.35882
Q99704	DOK1_HUMAN	481	8	1.6632	48	9.97921	35	7.27651	83	17.2557	54	11.2266	42	8.73181
P09543	CN37_HUMAN	421	7	1.66271	63	14.9644	37	8.7886	100	23.753	70	16.6271	42	9.97625
Q2M1Z3	RHG31_HUMAN	1444	24	1.66205	137	9.48753	61	4.22438	198	13.7119	161	11.1496	84	5.81717
Q8NBU5	ATAD1_HUMAN	361	6	1.66205	43	11.9114	22	6.09418	65	18.0055	49	13.5734	28	7.75623
Q24JP5	T132A_HUMAN	1023	17	1.66178	90	8.79765	52	5.08309	142	13.8807	107	10.4594	68	6.64712
Q8NE09	RGS22_HUMAN	1264	21	1.66139	166	13.1329	140	11.0759	306	24.2089	186	14.7152	156	12.3418
Q9HAI6	TASL_HUMAN	301	5	1.66113	23	7.6412	22	7.30897	45	14.9502	28	9.30233	27	8.9701
P20618	PSB1_HUMAN	241	4	1.65975	28	11.6183	21	8.71369	49	20.332	31	12.8631	25	10.3734
Q13325	IFIT5_HUMAN	482	8	1.65975	69	14.3154	50	10.3734	119	24.6888	77	15.9751	58	12.0332
Q53GL7	PAR10_HUMAN	1025	17	1.65854	78	7.60976	40	3.90244	118	11.5122	93	9.07317	56	5.46341
Q71RC2	LARP4_HUMAN	724	12	1.65746	74	10.221	48	6.62983	122	16.8508	85	11.7403	59	8.14917
Q9NQ33	ASCL3_HUMAN	181	3	1.65746	23	12.7072	15	8.28729	38	20.9945	25	13.8122	18	9.94475
P42126	ECI1_HUMAN	302	5	1.65563	33	10.9272	18	5.96026	51	16.8874	38	12.5828	22	7.28477
Q8IYI6	EXOC8_HUMAN	725	12	1.65517	86	11.8621	52	7.17241	138	19.0345	97	13.3793	64	8.82759
Q9NX46	ADPRS_HUMAN	363	6	1.65289	30	8.26446	28	7.7135	58	15.978	34	9.36639	33	9.09091
Q13470	TNK1_HUMAN	666	11	1.65165	67	10.0601	36	5.40541	103	15.4655	76	11.4114	46	6.90691
Q14315	FLNC_HUMAN	2725	45	1.65138	259	9.50459	182	6.6789	441	16.1835	298	10.9358	225	8.25688
Q9UEW8	STK39_HUMAN	545	9	1.65138	63	11.5596	30	5.50459	93	17.0642	70	12.844	39	7.15596
Q9BRQ3	NUD22_HUMAN	303	5	1.65017	19	6.27063	20	6.60066	39	12.8713	24	7.92079	25	8.25083
O95996	APCL_HUMAN	2303	38	1.65002	260	11.2896	69	2.99609	329	14.2857	290	12.5923	104	4.51585
P51648	AL3A2_HUMAN	485	8	1.64948	54	11.134	41	8.45361	95	19.5876	62	12.7835	49	10.1031
Q14896	MYPC3_HUMAN	1274	21	1.64835	146	11.46	93	7.29984	239	18.7598	163	12.7943	113	8.8697
Q9NUQ2	PLCE_HUMAN	364	6	1.64835	47	12.9121	41	11.2637	88	24.1758	53	14.5604	46	12.6374
O14617	AP3D1_HUMAN	1153	19	1.64788	162	14.0503	59	5.11709	221	19.1674	179	15.5247	78	6.76496
Q9Y6M7	S4A7_HUMAN	1214	20	1.64745	136	11.2026	100	8.23723	236	19.4399	155	12.7677	117	9.63756
Q2WEN9	CEA16_HUMAN	425	7	1.64706	29	6.82353	29	6.82353	58	13.6471	36	8.47059	35	8.23529
Q14CX7	NAA25_HUMAN	972	16	1.64609	122	12.5514	85	8.74486	207	21.2963	136	13.9918	98	10.0823
Q9H4A9	DPEP2_HUMAN	486	8	1.64609	42	8.64198	27	5.55556	69	14.1975	50	10.2881	35	7.20165
Q9HAY6	BCDO1_HUMAN	547	9	1.64534	62	11.3346	61	11.1517	123	22.4863	70	12.7971	68	12.4314
Q14669	TRIPC_HUMAN	2067	34	1.6449	250	12.0948	120	5.80552	370	17.9003	282	13.643	154	7.45041
P28347	TEAD1_HUMAN	426	7	1.64319	47	11.0329	35	8.21596	82	19.2488	54	12.6761	42	9.85915
Q8IY37	DHX37_HUMAN	1157	19	1.64218	156	13.4831	65	5.61798	221	19.1011	175	15.1253	80	6.91443
O00400	ACATN_HUMAN	549	9	1.63934	43	7.83242	66	12.0219	109	19.8543	51	9.28962	73	13.2969
Q13976	KGP1_HUMAN	671	11	1.63934	91	13.5618	61	9.09091	152	22.6528	101	15.0522	71	10.5812
Q9P2A4	ABI3_HUMAN	366	6	1.63934	27	7.37705	18	4.91803	45	12.2951	33	9.01639	21	5.7377
Q6UB35	C1TM_HUMAN	978	16	1.63599	105	10.7362	46	4.70348	151	15.4397	120	12.2699	62	6.33947
P02747	C1QC_HUMAN	245	4	1.63265	19	7.7551	19	7.7551	38	15.5102	23	9.38776	22	8.97959
O43826	G6PT1_HUMAN	429	7	1.6317	28	6.52681	56	13.0536	84	19.5804	35	8.15851	63	14.6853
P0CAP2	GRL1A_HUMAN	368	6	1.63043	54	14.6739	16	4.34783	70	19.0217	60	16.3043	22	5.97826
Q9NQX3	GEPH_HUMAN	736	12	1.63043	68	9.23913	21	2.85326	89	12.0924	78	10.5978	32	4.34783
P22570	ADRO_HUMAN	491	8	1.62933	51	10.387	33	6.72098	84	17.1079	57	11.609	39	7.94297
P00505	AATM_HUMAN	430	7	1.62791	47	10.9302	40	9.30233	87	20.2326	54	12.5581	45	10.4651
P28330	ACADL_HUMAN	430	7	1.62791	51	11.8605	35	8.13953	86	20	56	13.0233	42	9.76744
Q8N1I0	DOCK4_HUMAN	1966	32	1.62767	223	11.3428	170	8.647	393	19.9898	250	12.7162	200	10.1729
P18075	BMP7_HUMAN	431	7	1.62413	44	10.2088	44	10.2088	88	20.4176	51	11.8329	50	11.6009
Q9UJD0	RIMS3_HUMAN	308	5	1.62338	35	11.3636	14	4.54545	49	15.9091	39	12.6623	19	6.16883
Q8IUM7	NPAS4_HUMAN	802	13	1.62095	41	5.11222	59	7.35661	100	12.4688	52	6.48379	70	8.72818
Q6GYQ0	RGPA1_HUMAN	2036	33	1.62083	193	9.47937	149	7.31827	342	16.7976	225	11.0511	179	8.79175
Q9H0K1	SIK2_HUMAN	926	15	1.61987	81	8.7473	57	6.15551	138	14.9028	96	10.3672	69	7.4514
P17987	TCPA_HUMAN	556	9	1.61871	66	11.8705	20	3.59712	86	15.4676	75	13.4892	29	5.21583
O15530	PDPK1_HUMAN	556	9	1.61871	64	11.5108	54	9.71223	118	21.223	73	13.1295	62	11.1511
Q9UQB9	AURKC_HUMAN	309	5	1.61812	42	13.5922	23	7.44337	65	21.0356	47	15.2104	26	8.41424
Q9Y4I1	MYO5A_HUMAN	1855	30	1.61725	275	14.8248	137	7.38544	412	22.2102	300	16.1725	164	8.84097
Q9NRA2	S17A5_HUMAN	495	8	1.61616	33	6.66667	65	13.1313	98	19.798	41	8.28283	72	14.5455
Q2KHT3	CL16A_HUMAN	1053	17	1.61443	93	8.83191	72	6.83761	165	15.6695	108	10.2564	89	8.45204
P54098	DPOG1_HUMAN	1239	20	1.61421	137	11.0573	101	8.15174	238	19.209	154	12.4294	118	9.52381
O60706	ABCC9_HUMAN	1549	25	1.61394	140	9.03809	141	9.10265	281	18.1407	164	10.5875	161	10.3938
Q8TAZ6	CKLF2_HUMAN	248	4	1.6129	35	14.1129	19	7.66129	54	21.7742	39	15.7258	23	9.27419
Q9BTV5	FSD1_HUMAN	496	8	1.6129	61	12.2984	40	8.06452	101	20.3629	68	13.7097	46	9.27419
Q9H0F7	ARL6_HUMAN	186	3	1.6129	23	12.3656	13	6.98925	36	19.3548	26	13.9785	16	8.60215
P38935	SMBP2_HUMAN	993	16	1.61128	133	13.3938	44	4.43102	177	17.8248	147	14.8036	58	5.84089
Q15582	BGH3_HUMAN	683	11	1.61054	68	9.95608	36	5.27086	104	15.2269	79	11.5666	47	6.88141
Q15070	OXA1L_HUMAN	435	7	1.6092	40	9.1954	33	7.58621	73	16.7816	46	10.5747	40	9.1954
Q9Y6H8	CXA3_HUMAN	435	7	1.6092	37	8.50575	32	7.35632	69	15.8621	43	9.88506	39	8.96552
Q9BV79	MECR_HUMAN	373	6	1.60858	35	9.38338	22	5.89812	57	15.2815	41	10.992	28	7.5067
P49247	RPIA_HUMAN	311	5	1.60772	32	10.2894	19	6.10932	51	16.3987	37	11.8971	23	7.3955
P49895	IOD1_HUMAN	249	4	1.60643	26	10.4418	28	11.245	54	21.6867	29	11.6466	32	12.8514
Q8N4B1	SESQ1_HUMAN	249	4	1.60643	26	10.4418	22	8.83534	48	19.2771	30	12.0482	26	10.4418
Q5W041	ARMC3_HUMAN	872	14	1.6055	109	12.5	46	5.27523	155	17.7752	122	13.9908	59	6.76606
Q96SL4	GPX7_HUMAN	187	3	1.60428	19	10.1604	20	10.6952	39	20.8556	22	11.7647	23	12.2995
Q8IUC4	RHPN2_HUMAN	686	11	1.6035	75	10.9329	53	7.72595	128	18.6589	84	12.2449	63	9.18367
P16389	KCNA2_HUMAN	499	8	1.60321	39	7.81563	57	11.4228	96	19.2385	47	9.41884	64	12.8257
Q76L83	ASXL2_HUMAN	1435	23	1.60279	157	10.9408	46	3.20557	203	14.1463	177	12.3345	66	4.5993
O43556	SGCE_HUMAN	437	7	1.60183	40	9.15332	37	8.46682	77	17.6201	46	10.5263	43	9.83982
Q9BYX7	ACTBM_HUMAN	375	6	1.6	38	10.1333	28	7.46667	66	17.6	42	11.2	34	9.06667
Q86XL3	ANKL2_HUMAN	938	15	1.59915	120	12.7932	59	6.28998	179	19.0832	133	14.1791	74	7.88913
Q9HCC0	MCCB_HUMAN	563	9	1.59858	61	10.8348	44	7.81528	105	18.6501	70	12.4334	53	9.41385
O14773	TPP1_HUMAN	563	9	1.59858	32	5.68384	49	8.70337	81	14.3872	39	6.92718	57	10.1243
Q7Z5P9	MUC19_HUMAN	8384	134	1.59828	408	4.86641	223	2.65983	631	7.52624	531	6.33349	346	4.12691
P22732	GTR5_HUMAN	501	8	1.59681	32	6.38723	48	9.58084	80	15.9681	40	7.98403	55	10.978
P35237	SPB6_HUMAN	376	6	1.59574	41	10.9043	39	10.3723	80	21.2766	46	12.234	43	11.4362
Q9NXG6	P4HTM_HUMAN	502	8	1.59363	45	8.96414	38	7.56972	83	16.5339	53	10.5578	46	9.16335
A6NIH7	U119B_HUMAN	251	4	1.59363	27	10.757	24	9.56175	51	20.3187	31	12.3506	27	10.757
Q99453	PHX2B_HUMAN	314	5	1.59236	30	9.55414	21	6.6879	51	16.242	35	11.1465	26	8.28025
O00591	GBRP_HUMAN	440	7	1.59091	40	9.09091	59	13.4091	99	22.5	47	10.6818	66	15
O43566	RGS14_HUMAN	566	9	1.59011	60	10.6007	26	4.59364	86	15.1943	69	12.1908	34	6.00707
Q7Z3E5	ARMC9_HUMAN	818	13	1.58924	86	10.5134	57	6.96822	143	17.4817	98	11.9804	70	8.55746
Q14CM0	FRPD4_HUMAN	1322	21	1.5885	134	10.1362	72	5.44629	206	15.5825	153	11.5734	93	7.0348
P34897	GLYM_HUMAN	504	8	1.5873	60	11.9048	38	7.53968	98	19.4444	67	13.2937	45	8.92857
Q9H0C2	ADT4_HUMAN	315	5	1.5873	46	14.6032	37	11.746	83	26.3492	51	16.1905	42	13.3333
P42685	FRK_HUMAN	505	8	1.58416	55	10.8911	58	11.4851	113	22.3762	63	12.4752	66	13.0693
Q02040	AK17A_HUMAN	695	11	1.58273	145	20.8633	29	4.17266	174	25.036	154	22.1583	40	5.7554
Q9HD23	MRS2_HUMAN	443	7	1.58014	52	11.7381	28	6.32054	80	18.0587	59	13.3183	35	7.90068
O75486	SUPT3_HUMAN	317	5	1.57729	39	12.3028	22	6.94006	61	19.2429	44	13.8801	26	8.20189
Q12830	BPTF_HUMAN	3046	48	1.57584	370	12.1471	123	4.03808	493	16.1852	411	13.4931	165	5.41694
O00533	NCHL1_HUMAN	1208	19	1.57285	117	9.68543	97	8.0298	214	17.7152	133	11.0099	114	9.43709
Q9Y315	DEOC_HUMAN	318	5	1.57233	39	12.2642	20	6.28931	59	18.5535	44	13.8365	25	7.86164
P49643	PRI2_HUMAN	509	8	1.57171	69	13.556	50	9.82318	119	23.3792	77	15.1277	56	11.002
P45973	CBX5_HUMAN	191	3	1.57068	37	19.3717	14	7.32984	51	26.7016	39	20.4188	17	8.90052
Q99828	CIB1_HUMAN	191	3	1.57068	21	10.9948	16	8.37696	37	19.3717	24	12.5654	18	9.42408
Q9UHK6	AMACR_HUMAN	382	6	1.57068	44	11.5183	32	8.37696	76	19.8953	50	13.089	35	9.1623
Q9UM19	HPCL4_HUMAN	191	3	1.57068	24	12.5654	20	10.4712	44	23.0366	27	14.1361	23	12.0419
Q14188	TFDP2_HUMAN	446	7	1.56951	50	11.2108	24	5.38117	74	16.5919	56	12.5561	31	6.95067
Q9Y4H2	IRS2_HUMAN	1338	21	1.56951	108	8.07175	65	4.858	173	12.9297	126	9.41704	84	6.27803
P25788	PSA3_HUMAN	255	4	1.56863	30	11.7647	24	9.41176	54	21.1765	33	12.9412	28	10.9804
Q9NP85	PODO_HUMAN	383	6	1.56658	48	12.5326	19	4.96084	67	17.4935	54	14.0992	24	6.26632
Q9Y6M4	KC1G3_HUMAN	447	7	1.566	66	14.7651	41	9.17226	107	23.9374	72	16.1074	48	10.7383
P54840	GYS2_HUMAN	703	11	1.56472	81	11.522	77	10.9531	158	22.4751	92	13.0868	86	12.2333
Q8NI36	WDR36_HUMAN	895	14	1.56425	85	9.49721	74	8.26816	159	17.7654	99	11.0615	87	9.72067
O75821	EIF3G_HUMAN	320	5	1.5625	45	14.0625	21	6.5625	66	20.625	48	15	26	8.125
P56559	ARL4C_HUMAN	192	3	1.5625	26	13.5417	13	6.77083	39	20.3125	28	14.5833	16	8.33333
Q14940	SL9A5_HUMAN	896	14	1.5625	84	9.375	76	8.48214	160	17.8571	98	10.9375	89	9.93304
Q8NA61	CBY2_HUMAN	448	7	1.5625	60	13.3929	22	4.91071	82	18.3036	66	14.7321	29	6.47321
Q96B36	AKTS1_HUMAN	256	4	1.5625	21	8.20312	11	4.29688	32	12.5	24	9.375	14	5.46875
Q96KR6	F210B_HUMAN	192	3	1.5625	21	10.9375	13	6.77083	34	17.7083	24	12.5	16	8.33333
Q9BT40	INP5K_HUMAN	448	7	1.5625	39	8.70536	47	10.4911	86	19.1964	45	10.0446	54	12.0536
Q9H992	MARH7_HUMAN	704	11	1.5625	78	11.0795	38	5.39773	116	16.4773	87	12.358	49	6.96023
Q9Y2W7	CSEN_HUMAN	256	4	1.5625	28	10.9375	23	8.98438	51	19.9219	31	12.1094	27	10.5469
Q15393	SF3B3_HUMAN	1217	19	1.56122	113	9.28513	99	8.13476	212	17.4199	129	10.5998	117	9.6138
P16234	PGFRA_HUMAN	1089	17	1.56107	106	9.7337	87	7.98898	193	17.7227	118	10.8356	103	9.45822
A8MW99	MEI4_HUMAN	385	6	1.55844	38	9.87013	33	8.57143	71	18.4416	43	11.1688	39	10.1299
Q15020	SART3_HUMAN	963	15	1.55763	133	13.811	75	7.78816	208	21.5992	147	15.2648	89	9.24195
Q1W6H9	F110C_HUMAN	321	5	1.55763	46	14.3302	12	3.73832	58	18.0685	49	15.2648	16	4.98442
Q6DN90	IQEC1_HUMAN	963	15	1.55763	121	12.5649	57	5.919	178	18.4839	136	14.1225	69	7.16511
Q8IVF7	FMNL3_HUMAN	1028	16	1.55642	138	13.4241	69	6.71206	207	20.1362	152	14.786	84	8.17121
A6NI15	MSGN1_HUMAN	193	3	1.5544	23	11.9171	11	5.69948	34	17.6166	26	13.4715	14	7.25389
P46059	S15A1_HUMAN	708	11	1.55367	54	7.62712	79	11.1582	133	18.7853	63	8.89831	89	12.5706
Q96K12	FACR2_HUMAN	515	8	1.5534	56	10.8738	55	10.6796	111	21.5534	64	12.4272	62	12.0388
Q9Y4R8	TELO2_HUMAN	837	13	1.55317	82	9.79689	44	5.25687	126	15.0538	93	11.1111	56	6.69056
P50416	CPT1A_HUMAN	773	12	1.55239	88	11.3842	84	10.8668	172	22.251	97	12.5485	94	12.1604
Q9NVE7	PANK4_HUMAN	773	12	1.55239	85	10.9961	67	8.66753	152	19.6636	94	12.1604	79	10.2199
O75151	PHF2_HUMAN	1096	17	1.55109	153	13.9599	67	6.11314	220	20.073	168	15.3285	82	7.48175
O15018	PDZD2_HUMAN	2839	44	1.54984	301	10.6023	91	3.20535	392	13.8077	341	12.0113	134	4.71997
P82673	RT35_HUMAN	323	5	1.54799	47	14.5511	18	5.57276	65	20.1238	50	15.4799	21	6.50155
P31271	HXA13_HUMAN	388	6	1.54639	35	9.02062	29	7.47423	64	16.4948	41	10.567	34	8.76289
Q13616	CUL1_HUMAN	776	12	1.54639	104	13.4021	69	8.89175	173	22.2938	113	14.5619	79	10.1804
Q96AY3	FKB10_HUMAN	582	9	1.54639	52	8.93471	47	8.0756	99	17.0103	61	10.4811	56	9.62199
P30838	AL3A1_HUMAN	453	7	1.54525	44	9.71302	32	7.06402	76	16.777	51	11.2583	39	8.60927
P68543	UBX2A_HUMAN	259	4	1.5444	32	12.3552	18	6.94981	50	19.305	35	13.5135	22	8.49421
Q9Y5Z0	BACE2_HUMAN	518	8	1.5444	35	6.75676	53	10.2317	88	16.9884	42	8.10811	61	11.7761
P29353	SHC1_HUMAN	583	9	1.54374	52	8.91938	29	4.97427	81	13.8937	61	10.4631	38	6.51801
P19021	AMD_HUMAN	973	15	1.54162	94	9.66084	83	8.53032	177	18.1912	108	11.0997	94	9.66084
Q02928	CP4AB_HUMAN	519	8	1.54143	55	10.5973	41	7.89981	96	18.4971	61	11.7534	49	9.44123
O00478	BT3A3_HUMAN	584	9	1.5411	59	10.1027	47	8.04795	106	18.1507	68	11.6438	55	9.41781
O60469	DSCAM_HUMAN	2012	31	1.54076	197	9.79125	147	7.30616	344	17.0974	224	11.1332	176	8.74751
Q8WXX0	DYH7_HUMAN	4024	62	1.54076	465	11.5557	360	8.94632	825	20.502	521	12.9473	420	10.4374
P07384	CAN1_HUMAN	714	11	1.54062	88	12.3249	80	11.2045	168	23.5294	98	13.7255	90	12.605
O60667	FCMR_HUMAN	390	6	1.53846	44	11.2821	27	6.92308	71	18.2051	49	12.5641	33	8.46154
P20036	DPA1_HUMAN	260	4	1.53846	17	6.53846	25	9.61538	42	16.1538	21	8.07692	29	11.1538
P55809	SCOT1_HUMAN	520	8	1.53846	59	11.3462	34	6.53846	93	17.8846	66	12.6923	42	8.07692
Q5T124	UBX11_HUMAN	520	8	1.53846	55	10.5769	26	5	81	15.5769	62	11.9231	34	6.53846
Q8N6R1	SERP2_HUMAN	65	1	1.53846	9	13.8462	4	6.15385	13	20	10	15.3846	5	7.69231
Q2M389	WASC4_HUMAN	1173	18	1.53453	147	12.532	118	10.0597	265	22.5916	163	13.896	136	11.5942
Q9HBZ2	ARNT2_HUMAN	717	11	1.53417	63	8.78661	46	6.41562	109	15.2022	72	10.0418	55	7.67085
O15013	ARHGA_HUMAN	1369	21	1.53397	137	10.0073	81	5.91673	218	15.924	157	11.4682	101	7.37765
Q86VX9	MON1A_HUMAN	652	10	1.53374	74	11.3497	50	7.66871	124	19.0184	81	12.4233	59	9.04908
Q7Z7H8	RM10_HUMAN	261	4	1.53257	29	11.1111	11	4.21456	40	15.3257	33	12.6437	15	5.74713
O94901	SUN1_HUMAN	785	12	1.52866	74	9.42675	63	8.02548	137	17.4522	83	10.5732	75	9.55414
Q01892	SPIB_HUMAN	262	4	1.52672	27	10.3053	23	8.77863	50	19.084	31	11.8321	27	10.3053
Q9H840	GEMI7_HUMAN	131	2	1.52672	12	9.16031	9	6.87023	21	16.0305	13	9.92366	11	8.39695
Q16659	MK06_HUMAN	721	11	1.52566	68	9.43135	61	8.46047	129	17.8918	78	10.8183	70	9.70874
Q10570	CPSF1_HUMAN	1443	22	1.5246	145	10.0485	116	8.03881	261	18.0873	165	11.4345	136	9.42481
O75969	AKAP3_HUMAN	853	13	1.52403	100	11.7233	54	6.3306	154	18.0539	112	13.1301	67	7.85463
P13688	CEAM1_HUMAN	526	8	1.52091	31	5.89354	38	7.22433	69	13.1179	39	7.41445	45	8.55513
Q99619	SPSB2_HUMAN	263	4	1.52091	26	9.88593	16	6.08365	42	15.9696	30	11.4068	20	7.60456
Q5JTY5	ZNG1C_HUMAN	395	6	1.51899	40	10.1266	18	4.55696	58	14.6835	46	11.6456	24	6.07595
Q9BRT8	ZNG1A_HUMAN	395	6	1.51899	40	10.1266	20	5.06329	60	15.1899	46	11.6456	26	6.58228
Q495M9	USH1G_HUMAN	461	7	1.51844	63	13.6659	25	5.42299	88	19.0889	69	14.9675	31	6.72451
O15540	FABP7_HUMAN	132	2	1.51515	16	12.1212	12	9.09091	28	21.2121	18	13.6364	13	9.84848
O43323	DHH_HUMAN	396	6	1.51515	49	12.3737	28	7.07071	77	19.4444	54	13.6364	34	8.58586
P15090	FABP4_HUMAN	132	2	1.51515	19	14.3939	10	7.57576	29	21.9697	21	15.9091	12	9.09091
P54710	ATNG_HUMAN	66	1	1.51515	9	13.6364	7	10.6061	16	24.2424	9	13.6364	8	12.1212
P61247	RS3A_HUMAN	264	4	1.51515	51	19.3182	16	6.06061	67	25.3788	55	20.8333	19	7.19697
P80188	NGAL_HUMAN	198	3	1.51515	23	11.6162	22	11.1111	45	22.7273	25	12.6263	25	12.6263
Q6P2D8	XRRA1_HUMAN	792	12	1.51515	101	12.7525	50	6.31313	151	19.0657	113	14.2677	61	7.70202
Q9H2V7	SPNS1_HUMAN	528	8	1.51515	38	7.19697	49	9.2803	87	16.4773	46	8.71212	57	10.7955
O95342	ABCBB_HUMAN	1321	20	1.514	130	9.84103	124	9.38683	254	19.2279	149	11.2793	142	10.7494
P06865	HEXA_HUMAN	529	8	1.51229	44	8.31758	66	12.4764	110	20.794	51	9.64083	73	13.7996
Q7Z4G4	TRM11_HUMAN	463	7	1.51188	56	12.095	53	11.4471	109	23.5421	62	13.3909	60	12.959
Q58DX5	NADL2_HUMAN	795	12	1.50943	76	9.55975	61	7.67296	137	17.2327	87	10.9434	71	8.93082
Q6X4W1	NSMF_HUMAN	530	8	1.50943	78	14.717	40	7.54717	118	22.2642	86	16.2264	47	8.86792
P04198	MYCN_HUMAN	464	7	1.50862	49	10.5603	18	3.87931	67	14.4397	55	11.8534	25	5.38793
P37802	TAGL2_HUMAN	199	3	1.50754	22	11.0553	14	7.03518	36	18.0905	25	12.5628	17	8.54271
Q92995	UBP13_HUMAN	863	13	1.50637	86	9.96524	78	9.03824	164	19.0035	97	11.2399	91	10.5446
O95343	SIX3_HUMAN	332	5	1.50602	37	11.1446	21	6.3253	58	17.4699	42	12.6506	26	7.83133
P00338	LDHA_HUMAN	332	5	1.50602	39	11.747	20	6.0241	59	17.7711	44	13.253	25	7.53012
O00716	E2F3_HUMAN	465	7	1.50538	42	9.03226	17	3.65591	59	12.6882	49	10.5376	24	5.16129
Q8N3Y1	FBXW8_HUMAN	598	9	1.50502	61	10.2007	51	8.52843	112	18.7291	69	11.5385	60	10.0334
P15428	PGDH_HUMAN	266	4	1.50376	23	8.64662	19	7.14286	42	15.7895	27	10.1504	22	8.27068
Q02575	HEN1_HUMAN	133	2	1.50376	21	15.7895	6	4.51128	27	20.3008	23	17.2932	8	6.01504
P49326	FMO5_HUMAN	533	8	1.50094	63	11.8199	48	9.00563	111	20.8255	70	13.1332	56	10.5066
Q96S38	KS6C1_HUMAN	1066	16	1.50094	111	10.4128	74	6.94184	185	17.3546	126	11.8199	89	8.34897
O14939	PLD2_HUMAN	933	14	1.50054	103	11.0397	88	9.43194	191	20.4716	115	12.3258	101	10.8253
Q5JPE7	NOMO2_HUMAN	1267	19	1.49961	109	8.603	109	8.603	218	17.206	127	10.0237	124	9.7869
A8MPY1	GBRR3_HUMAN	467	7	1.49893	46	9.85011	58	12.4197	104	22.2698	52	11.1349	65	13.9186
Q13564	ULA1_HUMAN	534	8	1.49813	56	10.4869	44	8.2397	100	18.7266	62	11.6105	50	9.3633
Q92630	DYRK2_HUMAN	601	9	1.4975	76	12.6456	35	5.82363	111	18.4692	85	14.1431	43	7.15474
Q6ULP2	AFTIN_HUMAN	936	14	1.49573	71	7.58547	55	5.87607	126	13.4615	84	8.97436	69	7.37179
O14544	SOCS6_HUMAN	535	8	1.49533	60	11.215	34	6.35514	94	17.5701	67	12.5234	40	7.47664
Q8IWQ3	BRSK2_HUMAN	736	11	1.49457	95	12.9076	42	5.70652	137	18.6141	105	14.2663	52	7.06522
P04062	GBA1_HUMAN	536	8	1.49254	44	8.20896	56	10.4478	100	18.6567	52	9.70149	63	11.7537
P43487	RANG_HUMAN	201	3	1.49254	33	16.4179	12	5.97015	45	22.3881	36	17.9104	15	7.46269
Q96CN5	LRC45_HUMAN	670	10	1.49254	99	14.7761	15	2.23881	114	17.0149	107	15.9701	24	3.58209
Q9H0U4	RAB1B_HUMAN	201	3	1.49254	22	10.9453	18	8.95522	40	19.9005	25	12.4378	21	10.4478
Q9HBA0	TRPV4_HUMAN	871	13	1.49254	94	10.7922	86	9.87371	180	20.6659	103	11.8255	98	11.2514
Q9P2W3	GBG13_HUMAN	67	1	1.49254	10	14.9254	6	8.95522	16	23.8806	10	14.9254	7	10.4478
O43581	SYT7_HUMAN	403	6	1.48883	59	14.6402	29	7.19603	88	21.8362	65	16.129	34	8.43672
P55072	TERA_HUMAN	806	12	1.48883	98	12.1588	45	5.58313	143	17.7419	110	13.6476	56	6.94789
Q9C0D6	FHDC1_HUMAN	1143	17	1.48731	144	12.5984	50	4.37445	194	16.9729	161	14.0857	64	5.5993
O15260	SURF4_HUMAN	269	4	1.48699	19	7.0632	38	14.1264	57	21.1896	23	8.55019	42	15.6134
O15021	MAST4_HUMAN	2623	39	1.48685	309	11.7804	101	3.85055	410	15.631	343	13.0766	137	5.22303
Q9UBP5	HEY2_HUMAN	337	5	1.48368	26	7.71513	14	4.1543	40	11.8694	31	9.19881	19	5.63798
P35452	HXD12_HUMAN	270	4	1.48148	31	11.4815	22	8.14815	53	19.6296	35	12.963	26	9.62963
Q8TBK2	SETD6_HUMAN	473	7	1.47992	46	9.72516	31	6.55391	77	16.2791	52	10.9937	37	7.82241
Q15319	PO4F3_HUMAN	338	5	1.47929	33	9.76331	17	5.02959	50	14.7929	38	11.2426	21	6.21302
Q8IX01	SUGP2_HUMAN	1082	16	1.47874	143	13.2163	70	6.4695	213	19.6858	158	14.6026	85	7.85582
Q8IZX4	TAF1L_HUMAN	1826	27	1.47864	226	12.3768	125	6.84556	351	19.2223	249	13.6364	150	8.21468
Q8WWB7	GLMP_HUMAN	406	6	1.47783	16	3.94089	38	9.35961	54	13.3005	22	5.41872	43	10.5911
O95394	AGM1_HUMAN	542	8	1.47601	53	9.7786	40	7.38007	93	17.1587	60	11.0701	46	8.48708
P41181	AQP2_HUMAN	271	4	1.47601	17	6.27306	21	7.74908	38	14.0221	21	7.74908	25	9.22509
[truncated: 1,004 more rows]

## Sheet: Reagent 1
Peptide_Length	Frequency	<7	>20	7~20	Total	Inappropriate	appropriate frequency
1	1434	10072	22002	11947	44021	32074	147237
2	1622
3	2452
4	1435
5	1670
6	1459	SUM
7	1281	8967
8	1062	8496
9	1456	13104
10	967	9670
11	1031	11341
12	819	9828
13	958	12454
14	744	10416
15	687	10305
16	672	10752
17	577	9809
18	588	10584
19	589	11191
20	516	10320
21	582
22	517
23	470
24	473
25	678
26	423
27	421
28	439
29	367
30	380
31	339
32	365
33	365
34	311
35	297
36	322
37	334
38	297
39	298
40	262
41	252
42	297
43	291
44	286
45	264
46	248
47	267
48	258
49	313
50	237
51	220
52	252
53	221
54	225
55	205
56	204
57	179
58	202
59	202
60	174
61	177
62	161
63	163
64	154
65	128
66	154
67	171
68	150
69	162
70	134
71	130
72	123
73	138
74	124
75	124
76	124
77	136
78	120
79	115
80	103
81	113
82	121
83	88
84	111
85	98
86	108
87	111
88	114
89	101
90	102
91	83
92	85
93	88
94	97
95	78
96	83
97	85
98	86
99	66
100	96
101	75
102	80
103	68
104	79
105	77
106	70
107	66
108	66
109	74
110	71
111	61
112	72
113	58
114	53
115	59
116	50
117	47
118	45
119	51
120	48
121	43
122	58
123	54
124	49
125	40
126	67
127	36
128	47
129	43
130	40
131	33
132	34
133	29
134	43
135	44
136	56
137	46
138	49
139	31
140	40
141	34
142	39
143	45
144	30
145	32
146	36
147	31
148	29
149	23
150	33
151	34
152	32
153	28
154	19
155	30
156	23
157	21
158	28
159	32
160	29
161	24
162	23
163	22
164	27
165	28
166	19
167	18
168	16
169	25
170	20
171	16
172	12
173	15
174	17
175	15
176	23
177	19
178	14
179	18
180	21
181	16
182	19
183	16
184	11
185	16
186	25
187	13
188	15
189	18
190	17
191	19
192	16
193	22
194	16
195	10
196	11
197	12
198	14
199	10
200	16
201	14
202	9
203	11
204	14
205	9
206	17
207	13
208	16
209	12
210	9
211	8
212	8
213	8
214	10
215	12
216	11
217	11
218	11
219	12
220	7
221	10
222	14
223	7
224	8
225	5
226	4
227	12
228	7
229	12
230	11
231	7
232	15
233	8
234	10
235	10
236	13
237	6
238	5
239	8
240	9
241	6
242	10
243	6
244	5
245	7
246	6
247	8
248	4
249	8
250	4
251	6
252	8
253	2
254	10
255	4
256	1
257	6
258	9
259	11
260	1
261	10
262	4
263	2
264	6
265	5
266	7
267	2
268	4
269	2
270	4
271	5
272	9
273	9
274	4
275	5
276	4
277	5
278	3
279	5
280	3
281	2
282	2
283	5
285	7
286	1
287	2
288	2
289	7
290	2
291	4
292	2
293	10
294	6
295	3
296	5
297	5
298	5
299	5
300	5
301	3
302	10
303	4
304	2
305	3
306	4
307	3
308	4
309	2
310	5
312	1
313	2
314	2
316	3
317	2
318	1
319	4
320	2
321	2
322	2
323	2
324	3
325	1
326	2
327	5
329	3
333	3
335	2
337	2
338	1
339	2
340	5
341	8
343	1
344	2
345	1
346	4
347	5
349	5
350	2
351	2
352	2
353	2
355	1
356	2
357	2
358	2
359	2
361	4
362	2
363	2
364	7
365	1
366	1
367	4
368	1
369	3
370	1
371	1
372	1
373	2
374	1
379	4
380	3
381	3
382	1
383	2
384	2
385	2
386	2
387	2
388	1
389	1
390	1
391	1
392	2
393	2
394	1
396	2
397	3
398	3
399	1
400	1
401	1
402	2
403	2
404	1
405	1
406	2
407	2
410	1
411	3
412	3
413	1
414	2
415	1
416	3
417	3
420	1
422	1
423	2
424	2
425	1
426	1
427	1
429	1
430	2
431	2
432	2
433	1
434	2
438	1
440	2
442	1
445	2
446	1
449	1
451	1
454	2
455	1
459	1
461	1
462	2
465	1
466	1
467	3
468	1
474	1
477	2
478	2
479	1
480	1
481	1
482	1
483	1
486	1
487	2
488	1
490	1
497	1
500	1
504	1
508	2
514	2
516	1
517	1
518	2
519	1
523	2
524	1
532	1
536	3
537	1
543	2
548	1
550	1
556	1
558	1
559	1
562	1
565	1
568	1
569	1
573	1
575	1
578	1
580	1
588	1
589	1
593	1
601	1
605	1
606	2
608	1
609	1
610	1
613	1
618	1
623	2
627	1
628	1
631	2
635	1
641	1
652	1
657	2
663	1
664	1
668	1
685	1
694	1
698	1
699	1
701	1
704	1
706	1
707	2
718	1
721	1
728	1
729	2
734	1
763	1
776	1
823	1
825	1
851	1
905	1
914	1
940	1
942	1
992	1
1016	1
1057	1
1124	1
1164	1
1167	1
1200	1
1208	1
1222	1
1320	1
1387	1
1610	1
1735	1
2269	1
2646	1
4328	1
6516	1
7797	1

## Sheet: Trypsin
Peptide_Length	Frequency	<7	>20	7~20	Total	Inappropriate	appropriate frequency
1	28066	106833	22192	69991	199016	129025	810145
2	21449
3	17742
4	14943
5	13133
6	11500	SUM
7	10179	71253
8	8848	70784
9	7854	70686
10	6510	65100
11	6070	66770
12	5179	62148
13	4598	59774
14	4023	56322
15	3692	55380
16	3200	51200
17	2819	47923
18	2626	47268
19	2323	44137
20	2070	41400
21	1921
22	1683
23	1535
24	1521
25	1303
26	1179
27	1120
28	1045
29	902
30	882
31	764
32	713
33	662
34	570
35	511
36	463
37	425
38	371
39	342
40	322
41	298
42	253
43	215
44	211
45	198
46	177
47	199
48	165
49	134
50	134
51	119
52	128
53	95
54	89
55	99
56	86
57	87
58	74
59	70
60	67
61	65
62	59
63	58
64	63
65	45
66	39
67	38
68	34
69	29
70	33
71	27
72	24
73	35
74	22
75	20
76	16
77	30
78	25
79	13
80	13
81	16
82	22
83	17
84	22
85	17
86	11
87	10
88	11
89	16
90	11
91	7
92	6
93	9
94	7
95	7
96	3
97	11
98	10
99	4
100	6
101	3
102	5
103	2
104	5
105	2
106	3
107	4
108	2
110	4
111	2
112	6
113	1
114	4
115	3
117	4
118	2
119	3
120	3
121	1
122	5
123	2
124	1
125	2
126	1
127	1
128	4
129	5
130	1
132	2
133	3
137	4
138	2
139	2
140	1
141	3
142	1
143	3
144	3
145	1
148	3
149	2
150	1
152	3
156	2
158	1
159	1
162	1
163	1
166	3
172	1
174	1
184	1
193	1
194	1
201	1
202	1
203	1
209	1
211	1
213	1
220	1
235	1
241	1
244	1
247	1
251	1
258	1
267	1
295	1
298	1
316	1
558	1
602	1
929	1

## Sheet: Chymotrypsin
Peptide_Length	Frequency	<7	>20	7~20	Total	Inappropriate	appropriate frequency
1	12080	54190	26627	53164	133981	80817	638576
2	9749
3	9545
4	8799
5	7355
6	6662	SUM
7	6625	46375
8	5950	47600
9	5440	48960
10	4753	47530
11	4426	48686
12	4189	50268
13	3609	46917
14	3450	48300
15	3132	46980
16	2649	42384
17	2505	42585
18	2239	40302
19	2251	42769
20	1946	38920
21	1737
22	1623
23	1507
24	1448
25	1296
26	1123
27	1123
28	1006
29	961
30	963
31	854
32	788
33	699
34	686
35	604
36	575
37	495
38	482
39	465
40	439
41	392
42	368
43	373
44	329
45	291
46	287
47	240
48	261
49	229
50	224
51	224
52	195
53	180
54	179
55	169
56	137
57	156
58	148
59	136
60	144
61	125
62	121
63	122
64	101
65	92
66	80
67	97
68	82
69	95
70	76
71	90
72	76
73	68
74	76
75	58
76	49
77	43
78	55
79	58
80	39
81	52
82	43
83	59
84	45
85	38
86	30
87	27
88	42
89	43
90	37
91	27
92	36
93	15
94	29
95	25
96	25
97	22
98	21
99	20
100	23
101	22
102	18
103	28
104	16
105	23
106	14
107	24
108	15
109	18
110	21
111	19
112	16
113	20
114	18
115	13
116	16
117	10
118	16
119	9
120	16
121	6
122	12
123	16
124	13
125	10
126	9
127	8
128	11
129	11
130	6
131	6
132	8
133	15
134	5
135	3
136	14
137	6
138	5
139	5
140	4
141	10
142	5
143	8
144	5
145	1
146	15
147	5
148	6
149	4
150	8
151	1
152	3
153	5
154	4
155	6
156	4
157	5
159	4
160	5
161	3
162	1
163	2
164	2
165	2
166	4
167	6
168	3
169	1
170	1
171	7
172	2
173	4
176	1
177	9
178	4
179	2
180	5
181	4
182	3
183	5
184	2
185	1
186	2
187	2
188	4
189	5
190	1
192	3
193	2
194	1
195	2
196	1
197	4
199	1
200	2
201	3
202	2
203	1
204	1
205	1
206	5
207	2
208	2
209	1
210	1
211	1
213	2
214	1
216	6
217	2
219	2
221	1
222	1
223	2
224	1
227	1
229	1
230	3
231	1
232	2
233	1
234	1
236	2
237	1
240	3
241	1
242	2
245	1
248	1
250	1
254	1
257	1
258	1
264	1
268	1
272	1
285	1
286	1
288	2
295	2
300	2
303	1
314	1
336	1
343	1
359	1
361	1
366	1
372	2
375	1
408	1
413	1
416	1
420	2
433	1
531	1
600	1
660	1
898	1
1020	1
1342	1

## Sheet: Trypsin + Chymo
Peptide_Length	Frequency	<7	>20	7~20	Total	Inappropriate	appropriate frequency
1	68416	234113	9421	86463	329997	243534	923650
2	50693
3	38806
4	30606
5	25074
6	20518	SUM
7	16768	117376
8	13633	109064
9	10860	97740
10	8855	88550
11	7397	81367
12	6178	74136
13	4809	62517
14	4083	57162
15	3558	53370
16	2817	45072
17	2404	40868
18	1986	35748
19	1620	30780
20	1495	29900
21	1252
22	1059
23	850
24	764
25	694
26	550
27	508
28	426
29	372
30	341
31	271
32	249
33	205
34	188
35	153
36	140
37	141
38	124
39	86
40	91
41	71
42	62
43	64
44	62
45	42
46	39
47	56
48	37
49	28
50	37
51	24
52	33
53	27
54	19
55	17
56	17
57	31
58	12
59	14
60	13
61	12
62	13
63	9
64	16
65	5
66	10
67	9
68	11
69	9
70	5
71	5
72	6
73	5
74	4
75	6
76	2
77	5
78	9
79	3
80	1
81	5
82	3
83	6
84	9
85	1
86	4
87	4
88	3
89	3
90	2
91	2
92	2
93	2
94	3
95	2
96	1
97	2
98	1
100	5
102	1
104	5
105	3
107	2
110	2
113	1
114	1
115	1
118	2
119	1
121	2
123	1
124	3
128	2
132	2
133	1
134	1
139	1
147	1
148	1
152	1
167	1
173	1
177	1
184	1
197	1
200	2
220	1
258	1
298	1
602	1
886	1

## Sheet: Trypsin + Reagent 1
Peptide_Length	Frequency	<7	>20	7~20	Total	Inappropriate	appropriate frequency
1	32924	138829	17261	79682	235772	156090	899083
2	29756
3	24768
4	19738
5	17024
6	14619	SUM
7	12647	88529
8	10703	85624
9	9686	87174
10	7735	77350
11	6881	75691
12	5806	69672
13	5029	65377
14	4334	60676
15	3796	56940
16	3303	52848
17	2831	48127
18	2651	47718
19	2243	42617
20	2037	40740
21	1751
22	1560
23	1353
24	1313
25	1087
26	1015
27	889
28	826
29	710
30	651
31	534
32	501
33	500
34	413
35	366
36	309
37	297
38	284
39	257
40	208
41	203
42	173
43	159
44	137
45	120
46	104
47	119
48	103
49	78
50	79
51	84
52	79
53	64
54	46
55	49
56	49
57	61
58	42
59	43
60	28
61	42
62	36
63	23
64	38
65	25
66	21
67	21
68	17
69	16
70	16
71	21
72	14
73	11
74	10
75	18
76	10
77	14
78	15
79	8
80	7
81	9
82	14
83	11
84	15
85	8
86	8
87	6
88	8
89	8
90	11
91	6
92	3
93	3
94	6
95	3
96	1
97	6
98	4
99	4
100	5
102	3
104	3
106	1
107	2
109	1
110	4
111	2
112	4
114	1
115	2
117	3
118	2
119	3
120	2
122	5
123	1
124	1
128	2
129	3
130	1
131	1
132	1
133	1
137	2
138	1
139	1
140	1
142	1
143	4
144	1
145	1
148	2
149	2
152	3
156	1
158	1
159	1
166	1
170	1
171	1
172	1
174	1
184	1
189	1
193	1
194	1
201	1
203	1
213	1
220	1
235	1
237	1
247	1
251	1
258	1
267	1
286	1
309	1
558	1
602	1
929	1

## Sheet: Chymo + Reagent 1
Peptide_Length	Frequency	<7	>20	7~20	Total	Inappropriate	appropriate frequency
1	16807	84279	22797	64490	171566	107076	752671
2	16311
3	15741
4	13307
5	12132
6	9981	SUM
7	9200	64400
8	8072	64576
9	6786	61074
10	6040	60400
11	5370	59070
12	4847	58164
13	4358	56654
14	3960	55440
15	3440	51600
16	2945	47120
17	2696	45832
18	2402	43236
19	2375	45125
20	1999	39980
21	1794
22	1607
23	1481
24	1420
25	1257
26	1064
27	1052
28	911
29	791
30	811
31	717
32	659
33	607
34	567
35	495
36	467
37	411
38	414
39	387
40	361
41	314
42	299
43	271
44	260
45	226
46	231
47	198
48	203
49	180
50	163
51	162
52	154
53	131
54	118
55	127
56	101
57	98
58	87
59	95
60	94
61	79
62	76
63	71
64	57
65	70
66	56
67	68
68	63
69	63
70	42
71	59
72	58
73	43
74	42
75	50
76	38
77	36
78	39
79	35
80	30
81	38
82	28
83	40
84	38
85	21
86	26
87	14
88	20
89	36
90	22
91	20
92	23
93	6
94	20
95	15
96	13
97	17
98	19
99	15
100	17
101	11
102	14
103	17
104	13
105	15
106	8
107	13
108	9
109	11
110	12
111	12
112	13
113	13
114	4
115	7
116	9
117	9
118	8
119	5
120	6
121	5
122	6
123	8
124	5
125	7
126	8
127	3
128	6
129	15
130	2
131	2
132	7
133	9
134	3
135	1
136	3
137	3
138	5
139	5
140	1
141	4
142	2
144	4
145	3
146	6
147	4
148	5
149	2
150	3
153	3
154	2
155	3
156	2
157	4
158	2
159	3
160	2
163	1
164	1
165	2
166	1
167	2
168	2
169	1
170	1
171	3
173	2
174	1
175	1
176	1
177	4
178	4
179	1
180	1
181	3
182	2
183	3
184	1
186	1
187	1
189	3
190	2
191	1
192	2
193	1
195	4
196	1
197	1
198	2
200	2
201	4
204	1
206	3
207	2
208	2
209	1
211	2
213	1
214	1
216	4
217	1
219	1
220	1
222	2
223	2
230	1
232	1
233	1
234	1
236	1
240	1
242	2
248	1
250	1
254	1
264	1
268	1
286	1
288	1
300	2
314	1
318	1
335	1
336	1
359	2
361	1
370	1
372	1
397	1
416	1
420	1
531	1
600	1
660	1
898	1
1020	1
1342	1

## Sheet: example
Entry_PDB	Entry_Name	Name	Total_AA	Reagent 1_Sites	Reagent 1 sites ratio (%)	Trypsin_Sites	Trypsin sites ratio (%)	Sequence
P81534	D103A_HUMAN	Beta-defensin 103	67	6	8.95522	14	20.8955	MRIHYLLFALLFLFLVPVPGHGGIINTLQKYYCRVRGGRCAVLSCLPKEEQIGKCSTRGRKCCRRKK
Q3LI64	KRA61_HUMAN	Keratin-associated protein 6-1	71	9	12.6761	3	4.22535	MCGSYYGNYYGTPGYGFCGYGGLGYGYGGLGCGYGSCCGCGFRRLGCGYGYGSRSLCGYGYGCGSGSGYYY
